# Supplementary material for: Synthesis of diversely substituted pyridin-2(1H)-ones and in vivo evaluation of their anti-allodynic effect on cutaneous inflammatory mechanical allodynia
Source: Royal Society of Chemistry journal article supplement (doi:10.1039/d4md00375f), 2024-01-01
Supplement: d4md00375f1.pdf [file d4md00375f1.pdf]

**Synthesis of diversely substituted pyridin-2(1H)-ones and *in vivo* evaluation of their anti-allodynic effect on cutaneous inflammatory mechanical allodynia**

*Théo Frazier,<sup>a,#</sup> Pauline Murail,<sup>b,#</sup> Arthur Boulangé,<sup>a</sup> Nazim Chalane,<sup>a</sup> Francis Giraud,<sup>a</sup> Alain Artola,<sup>b,\*</sup> Radhouane Dallel,<sup>b,\*</sup> Fabrice Anizon,<sup>a,\*</sup> Pascale Moreau,<sup>a,\*</sup>*

<sup>a</sup> Université Clermont Auvergne, CNRS, Clermont Auvergne INP, ICCF, F-63000 Clermont-Ferrand, France.

<sup>b</sup> Université Clermont Auvergne, CHU Clermont-Ferrand, Inserm, Neuro-Dol, F-63000 Clermont-Ferrand, France.

**Table of contents**

*<sup>1</sup>H and <sup>13</sup>C NMR spectra of compounds 4–10, 12–27, 31–40, 44, 45, 49–58, 69–88.....S2 to S68*

*HRMS spectra of compounds 4–10, 12–27, 31–40, 44, 45, 49–58, 69–88.....S69 to S102*

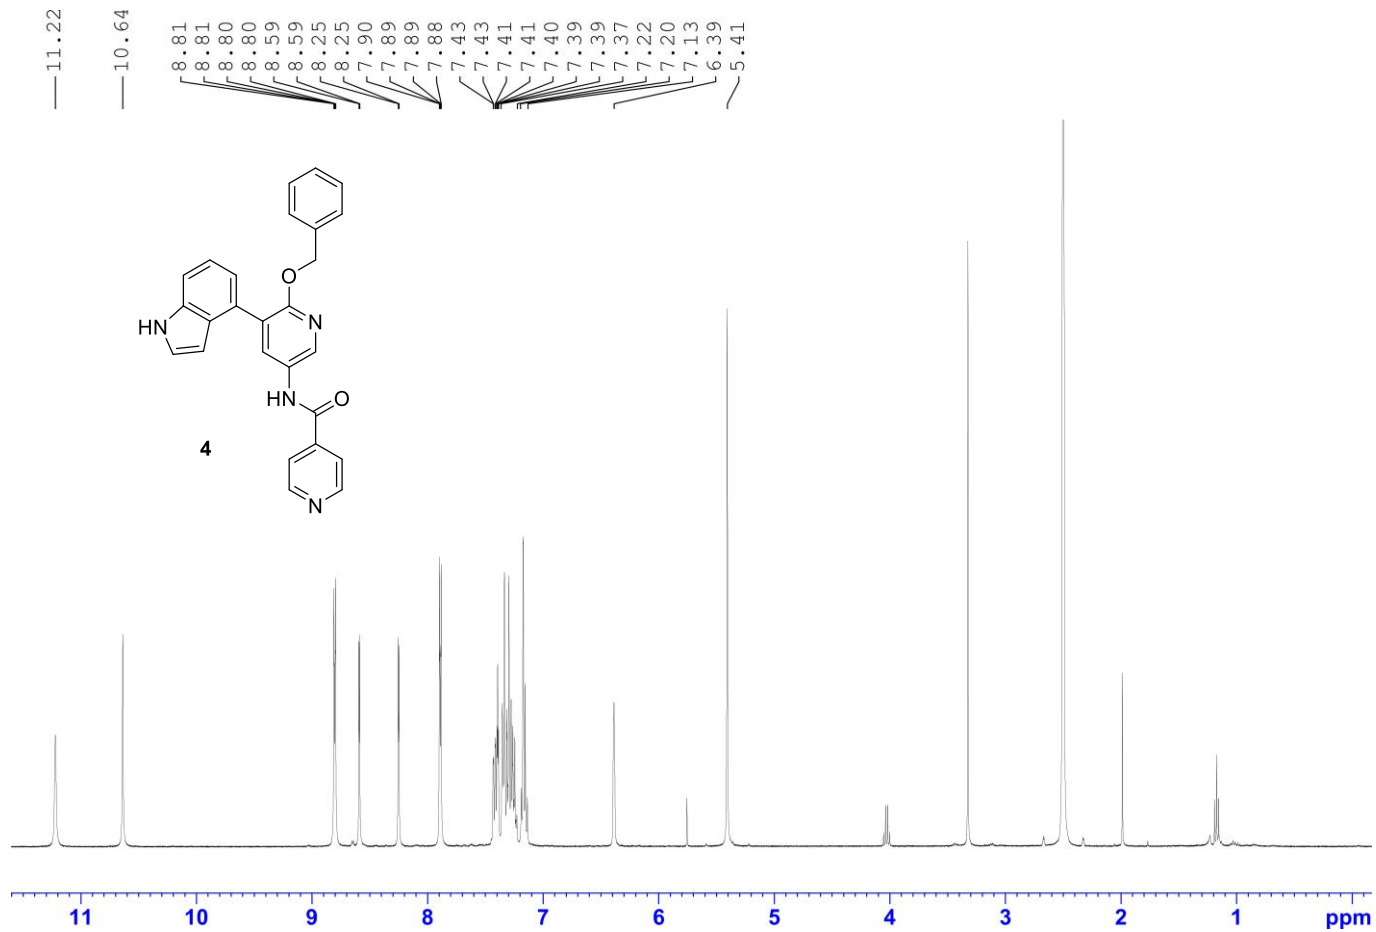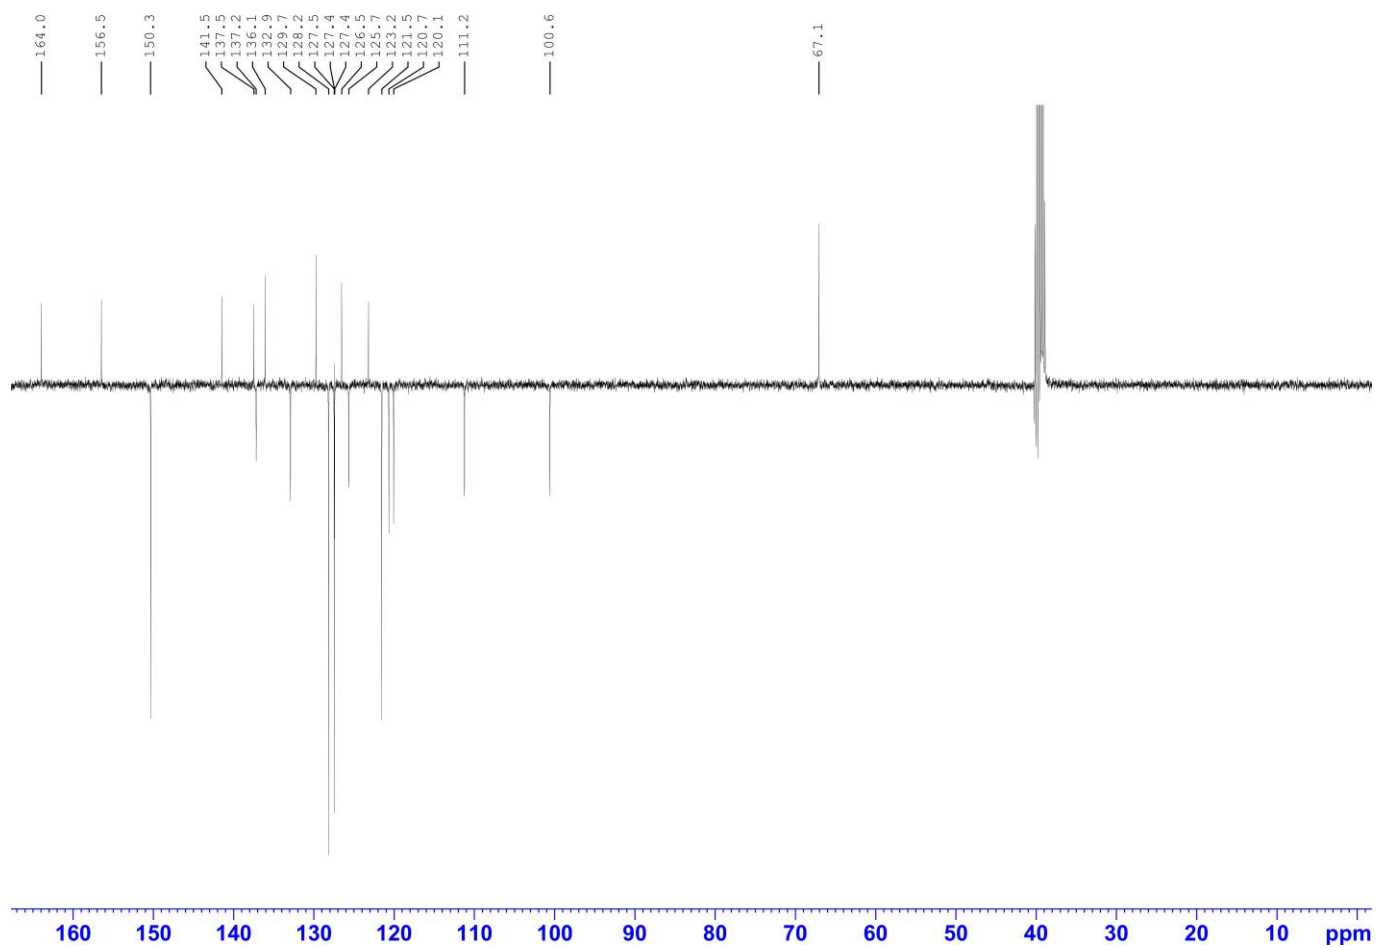

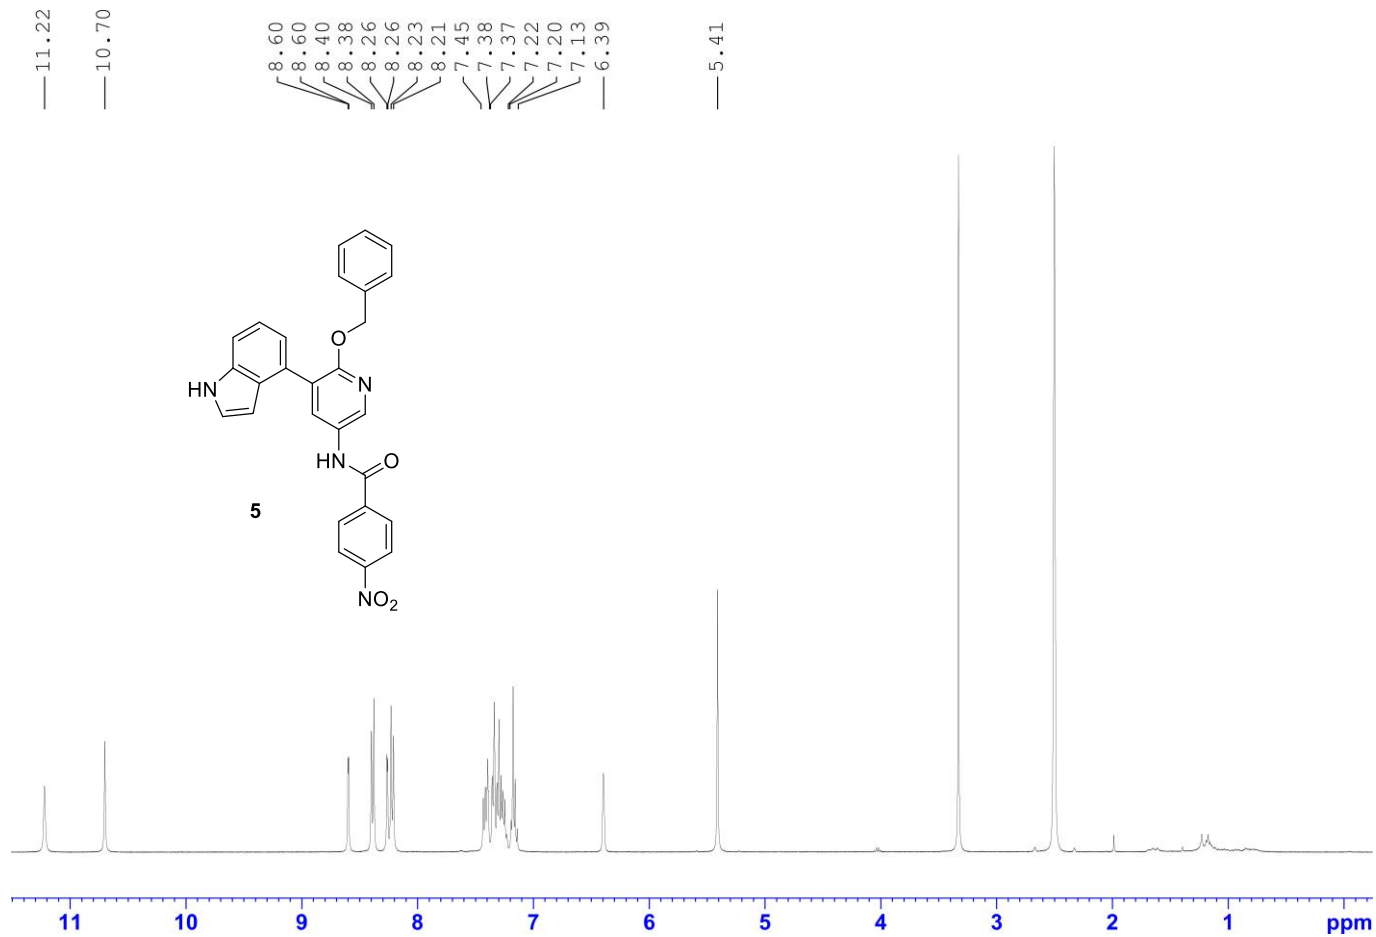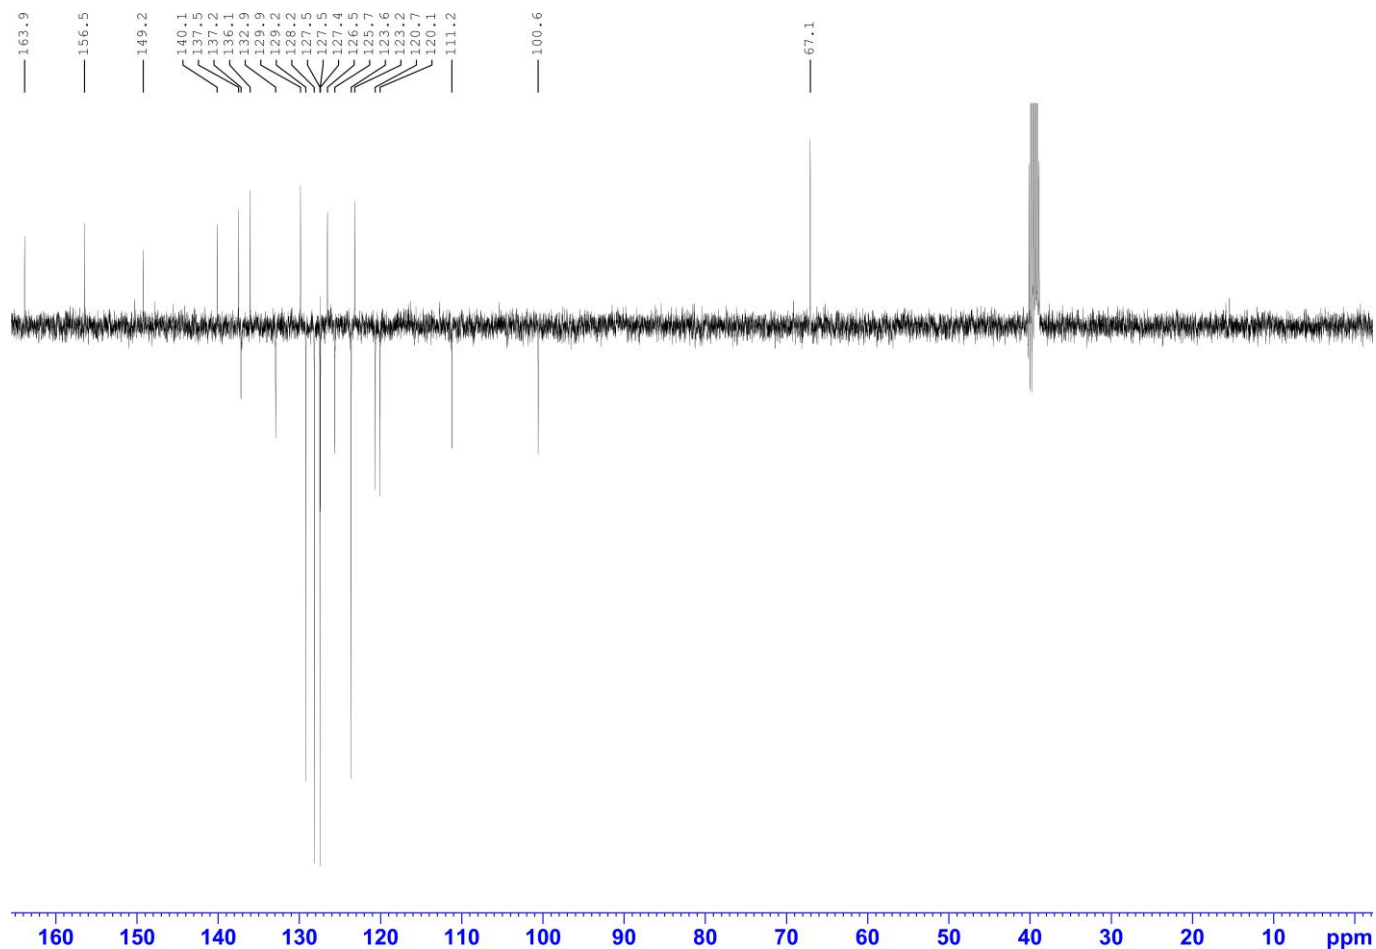

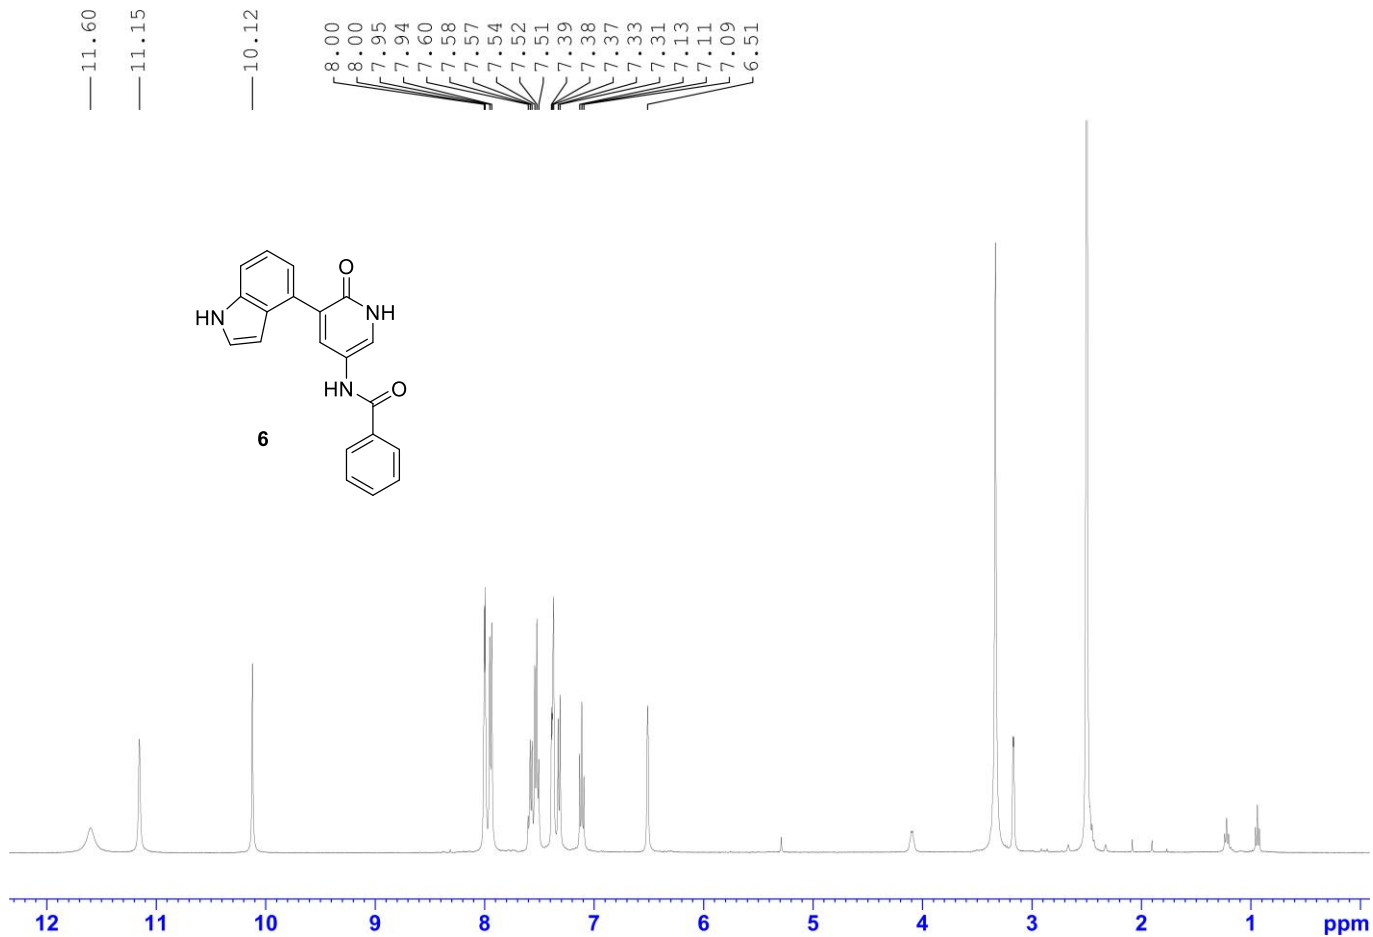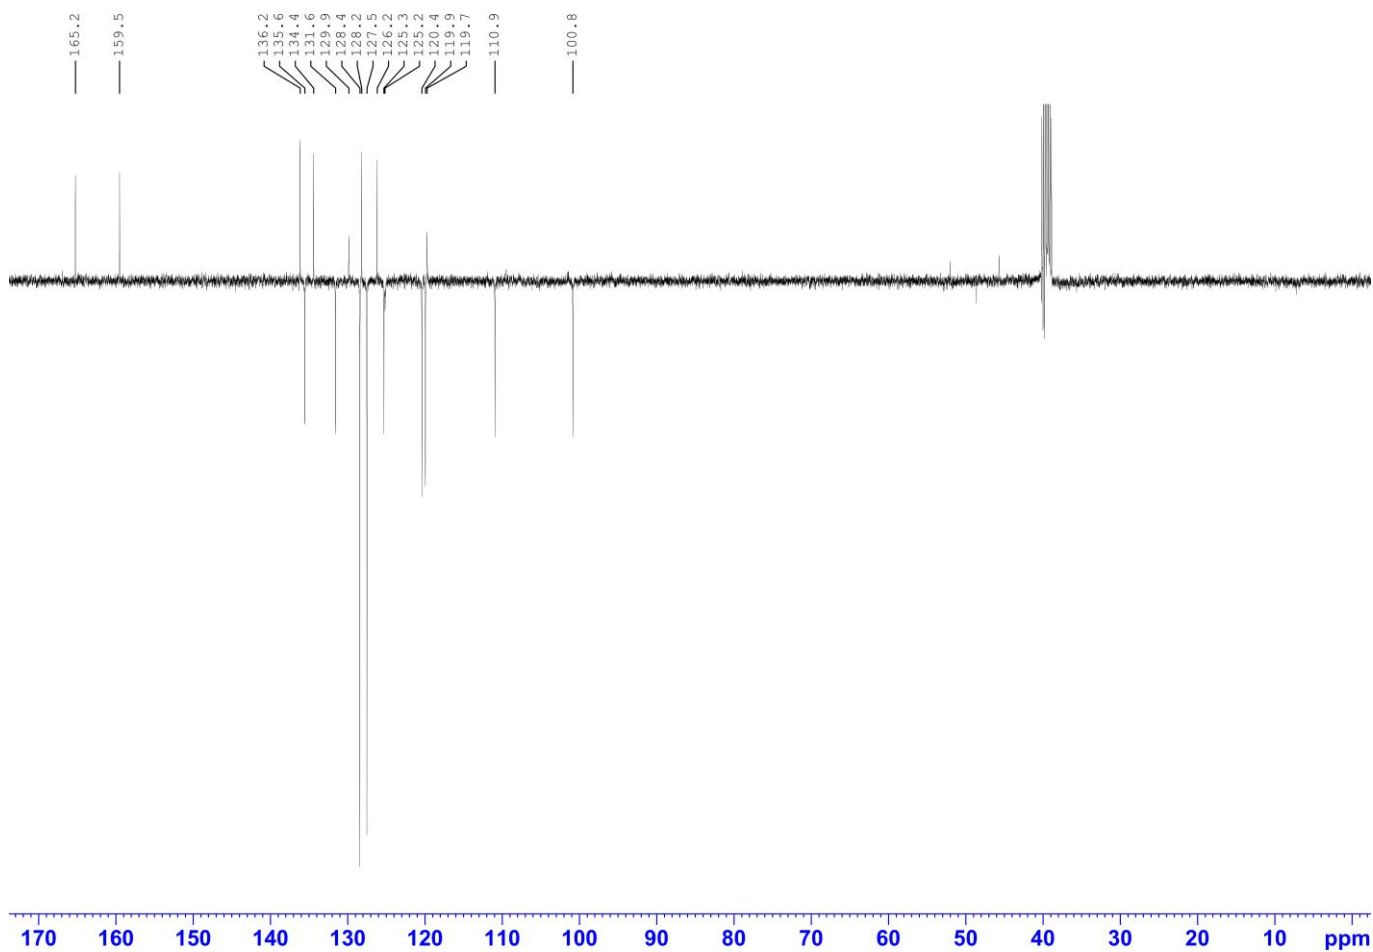

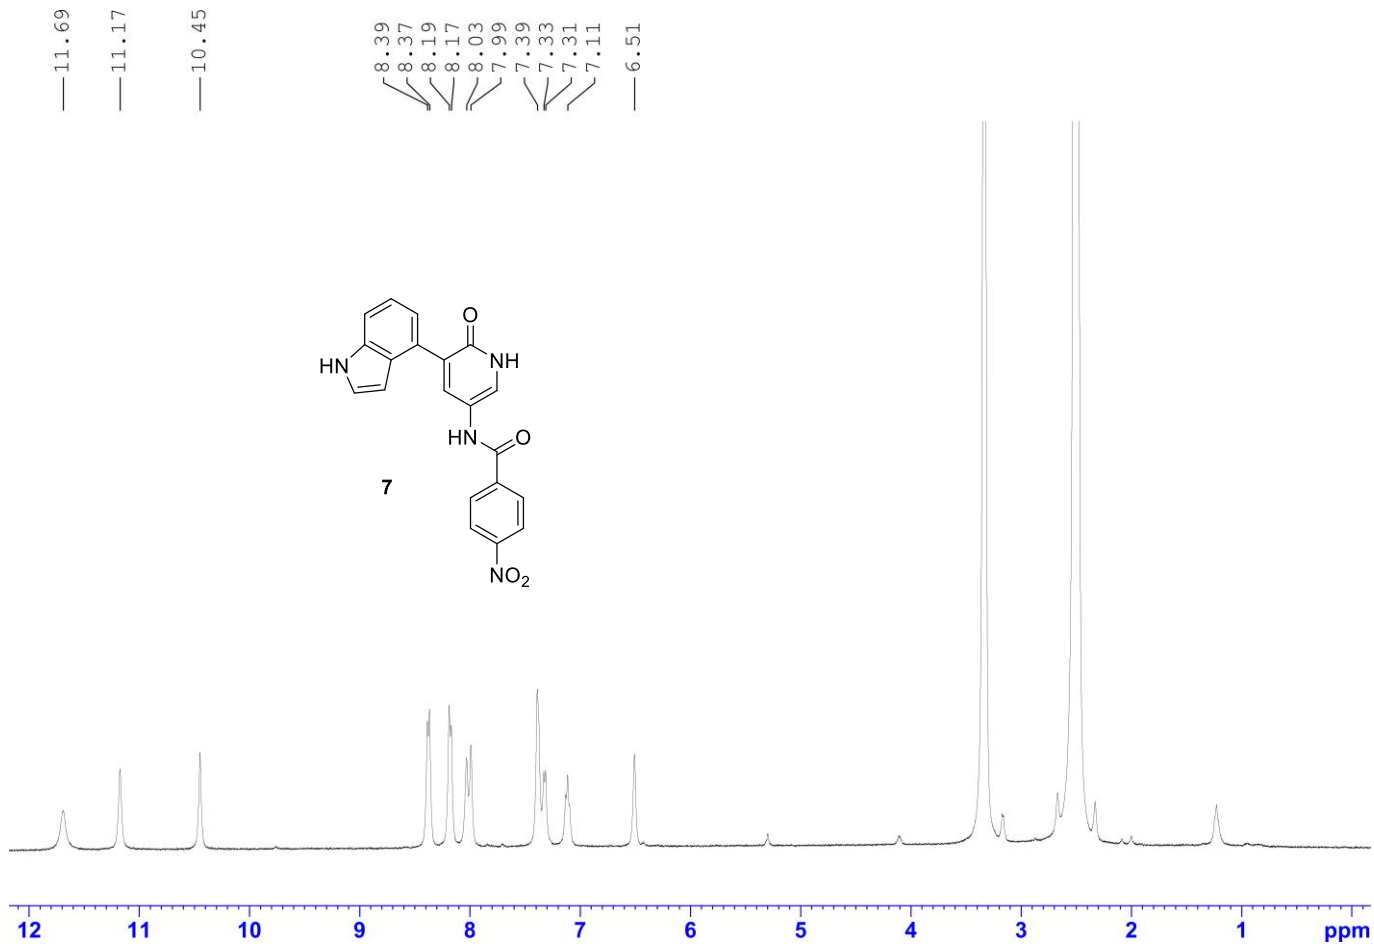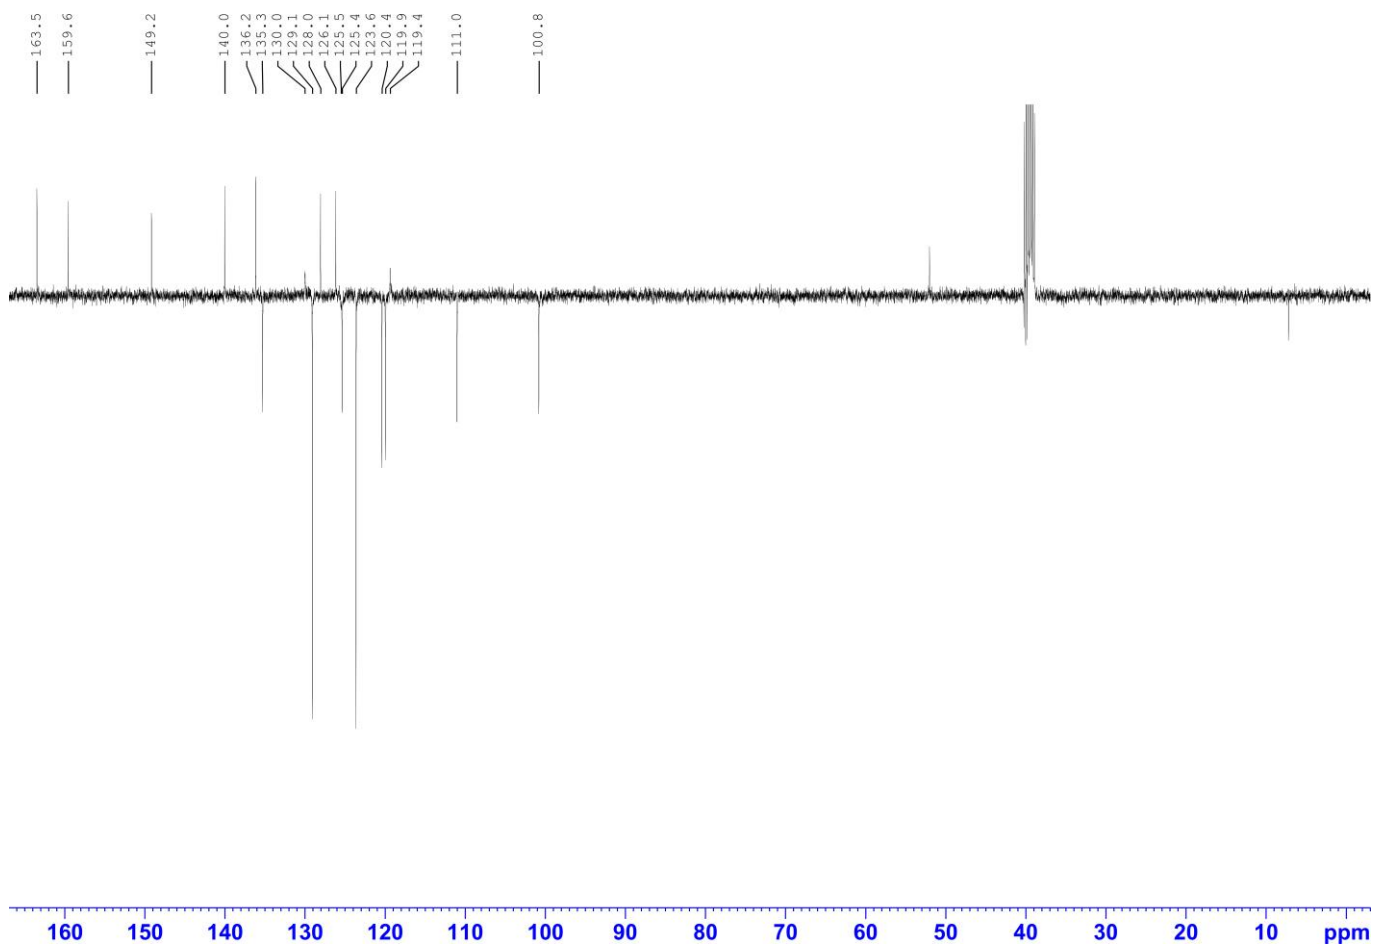

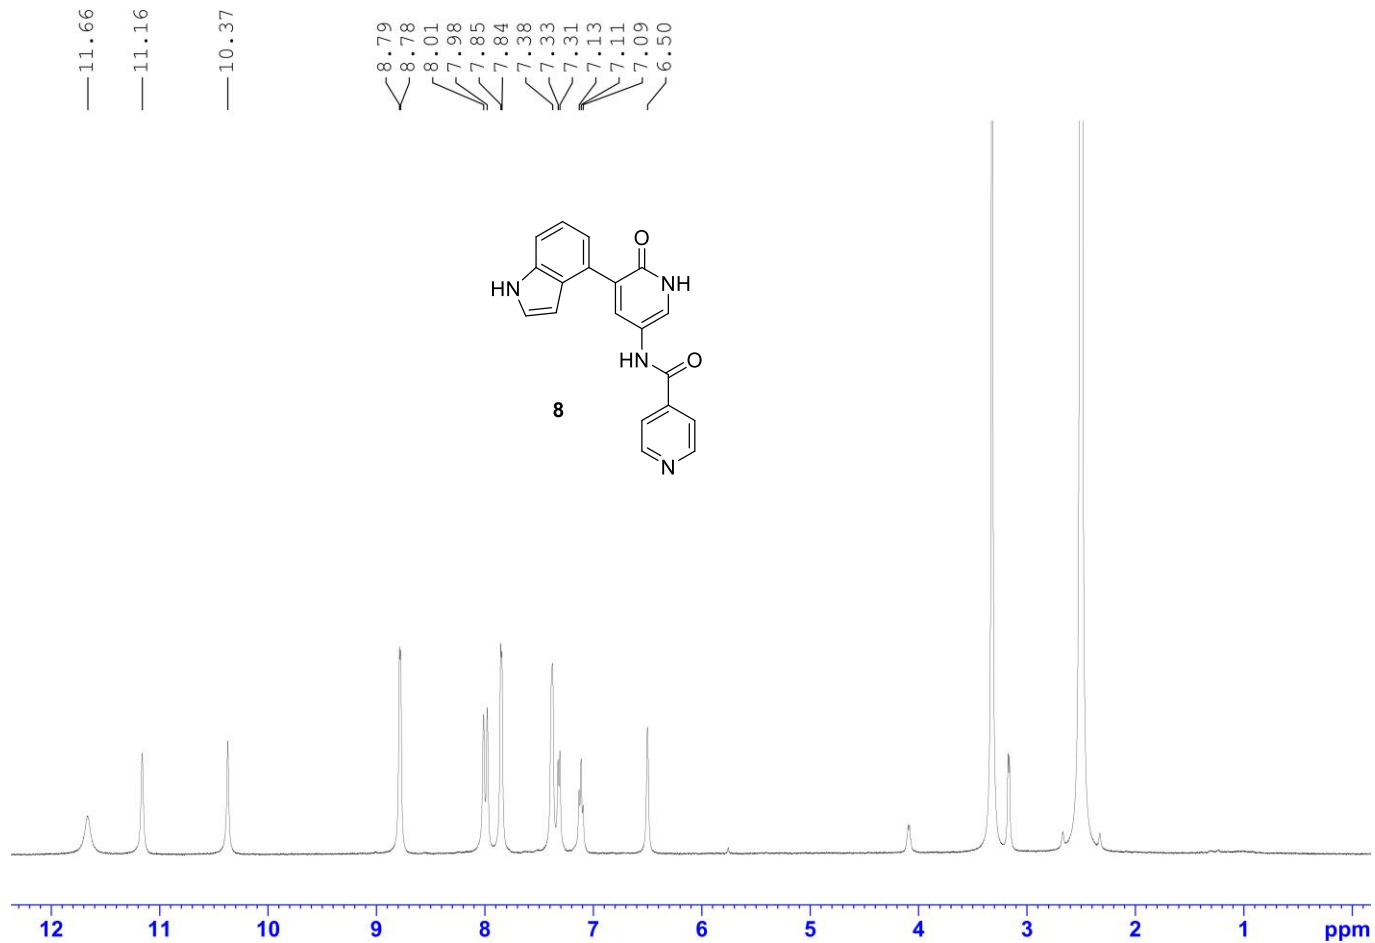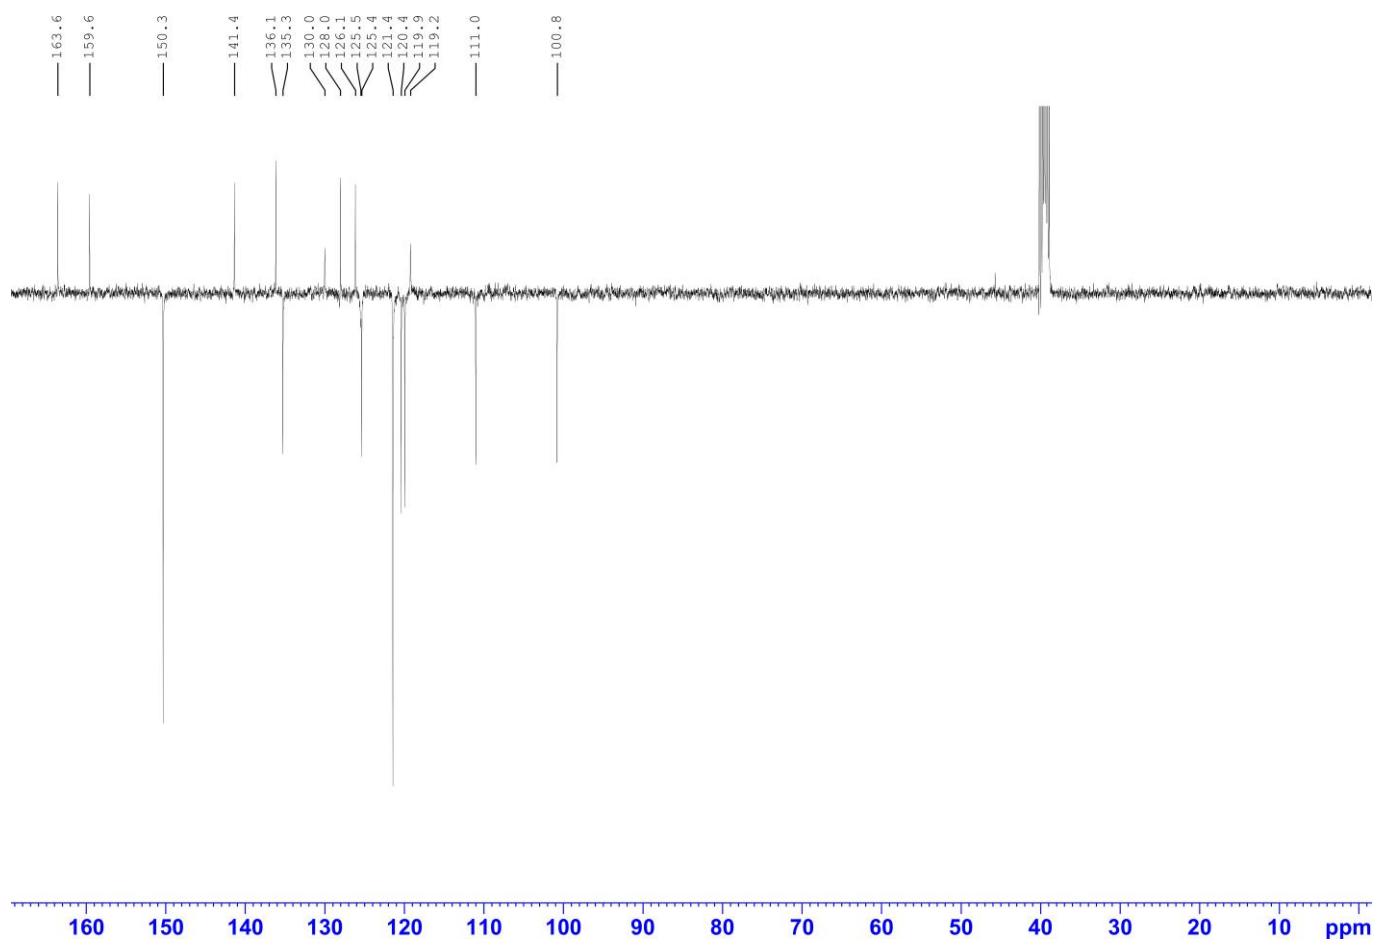

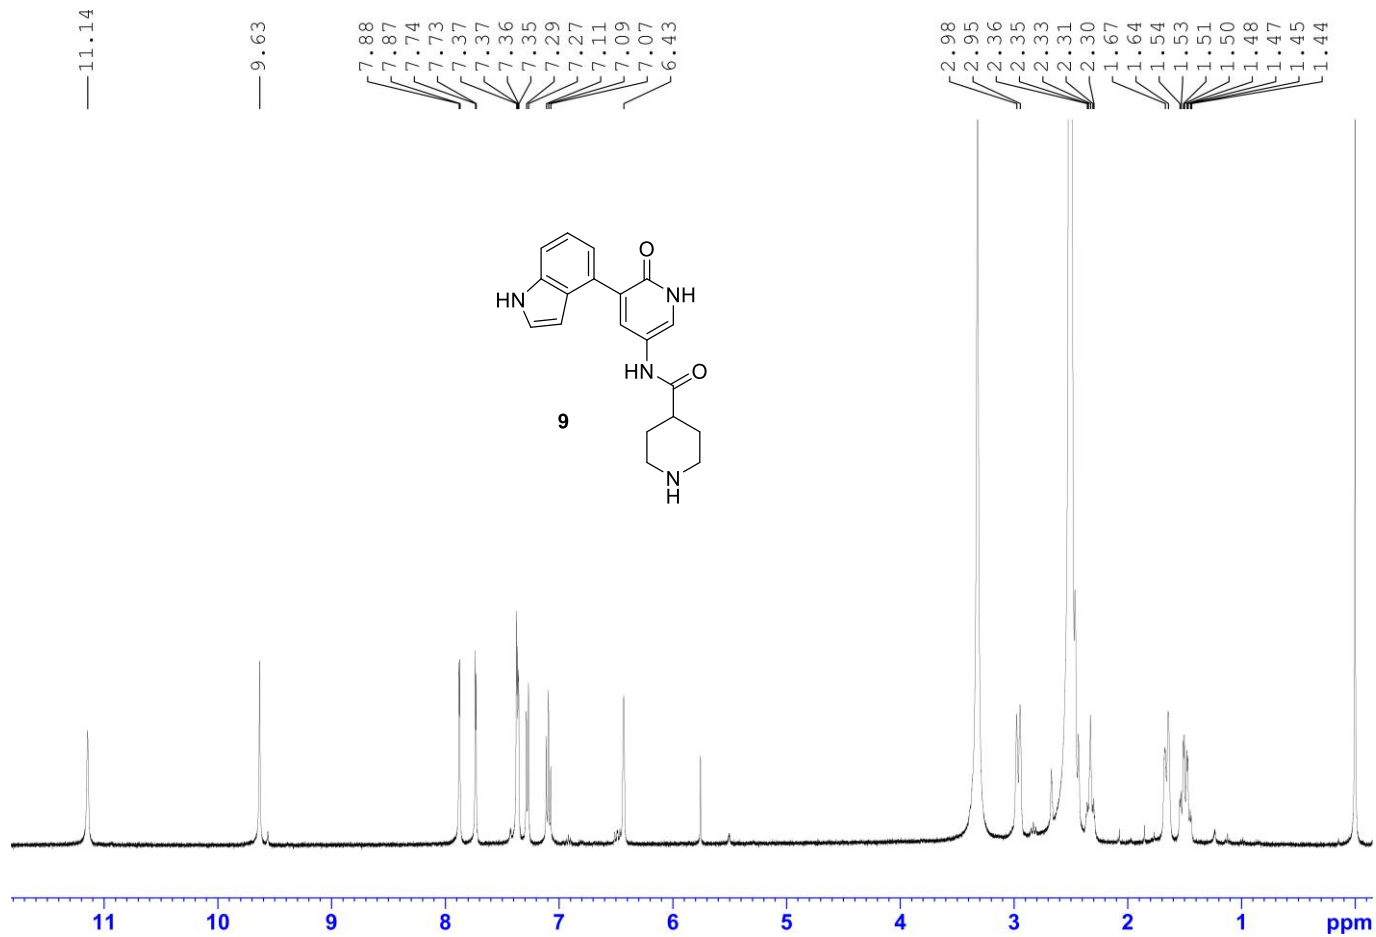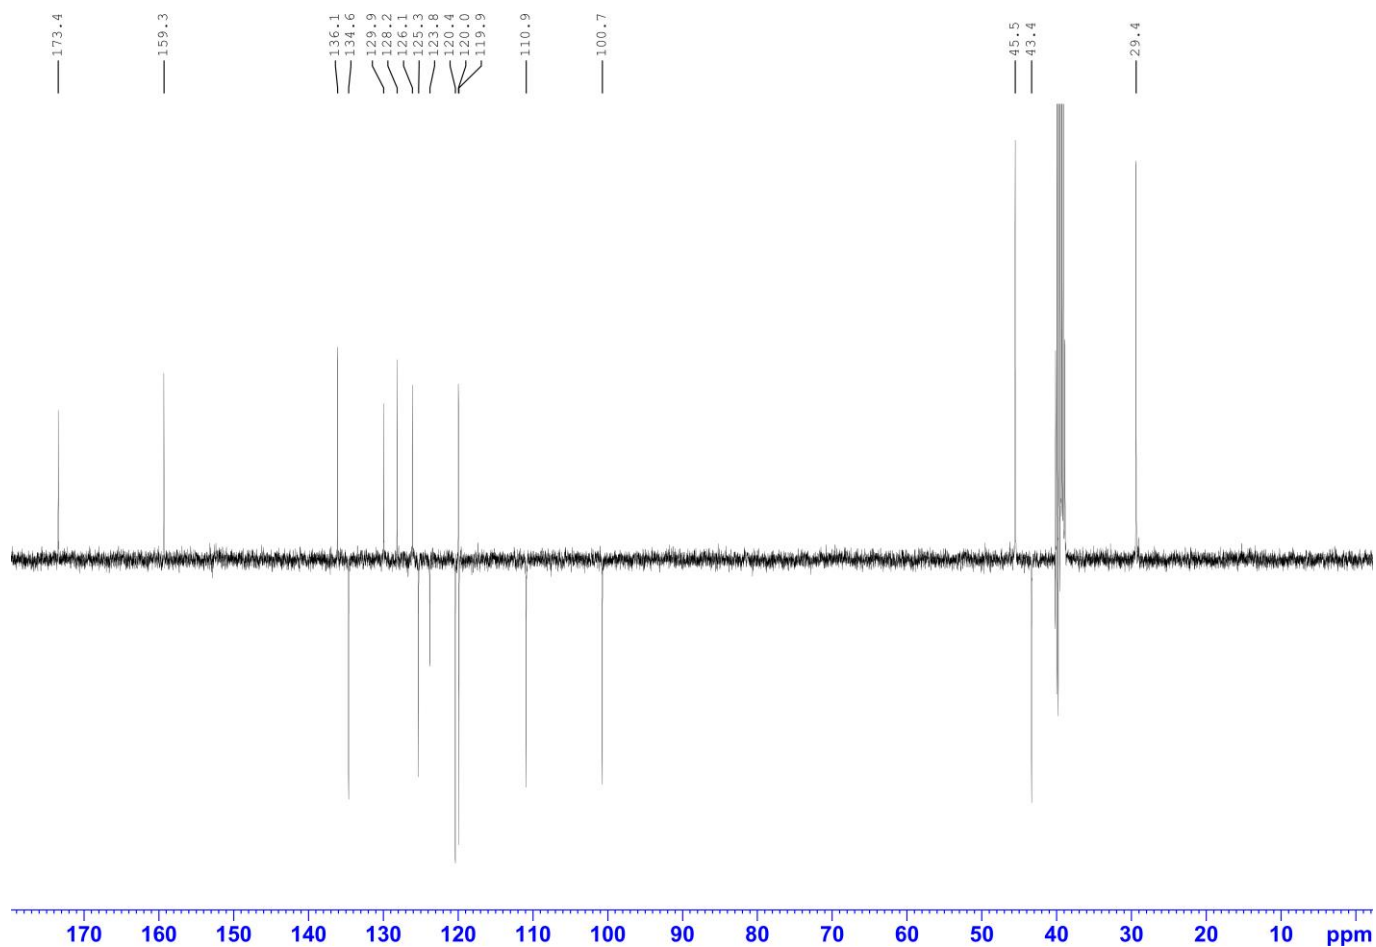

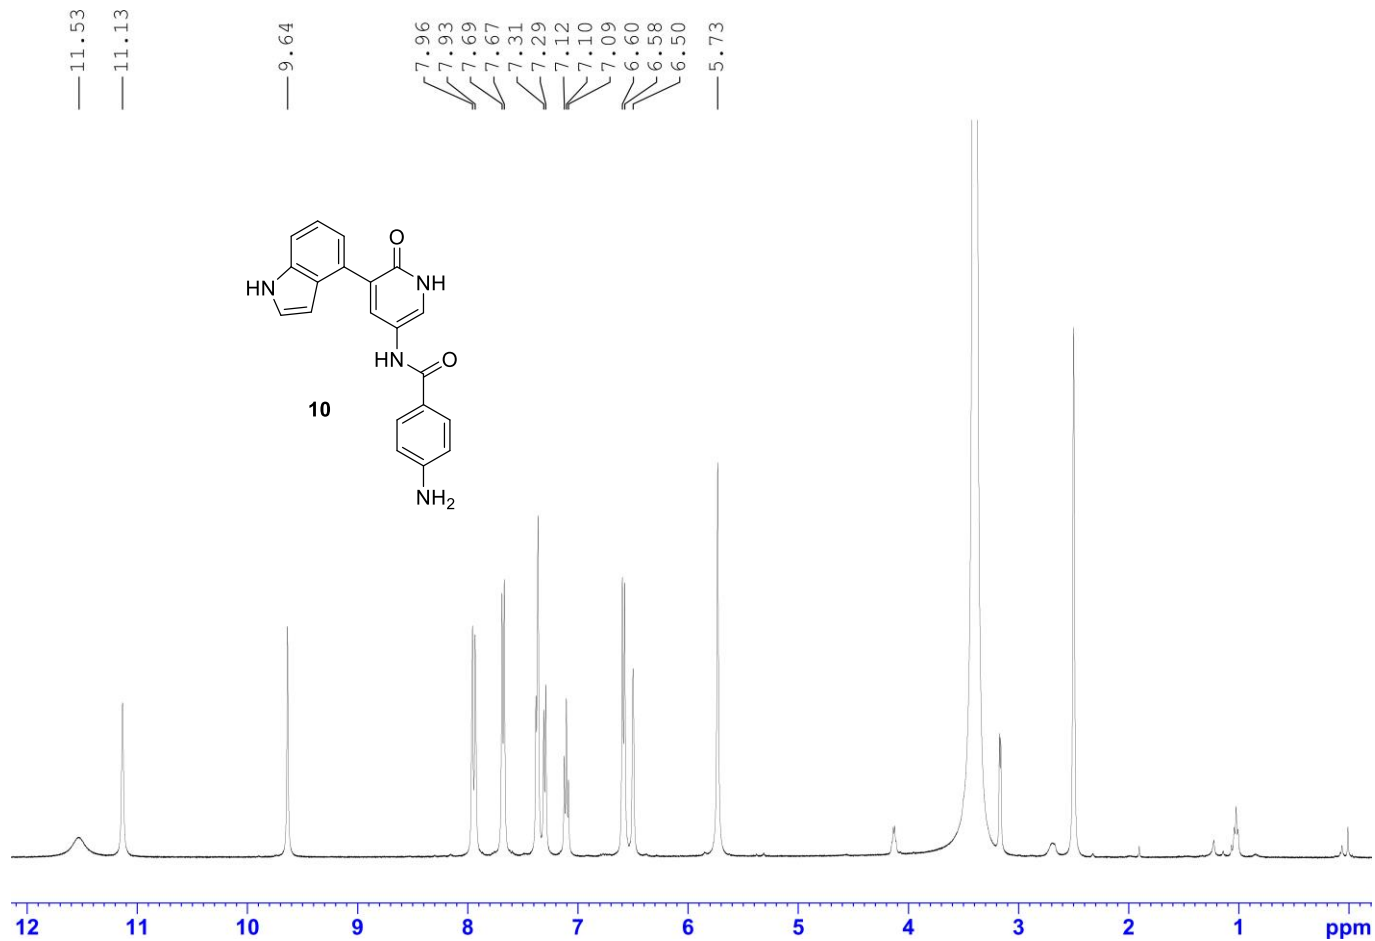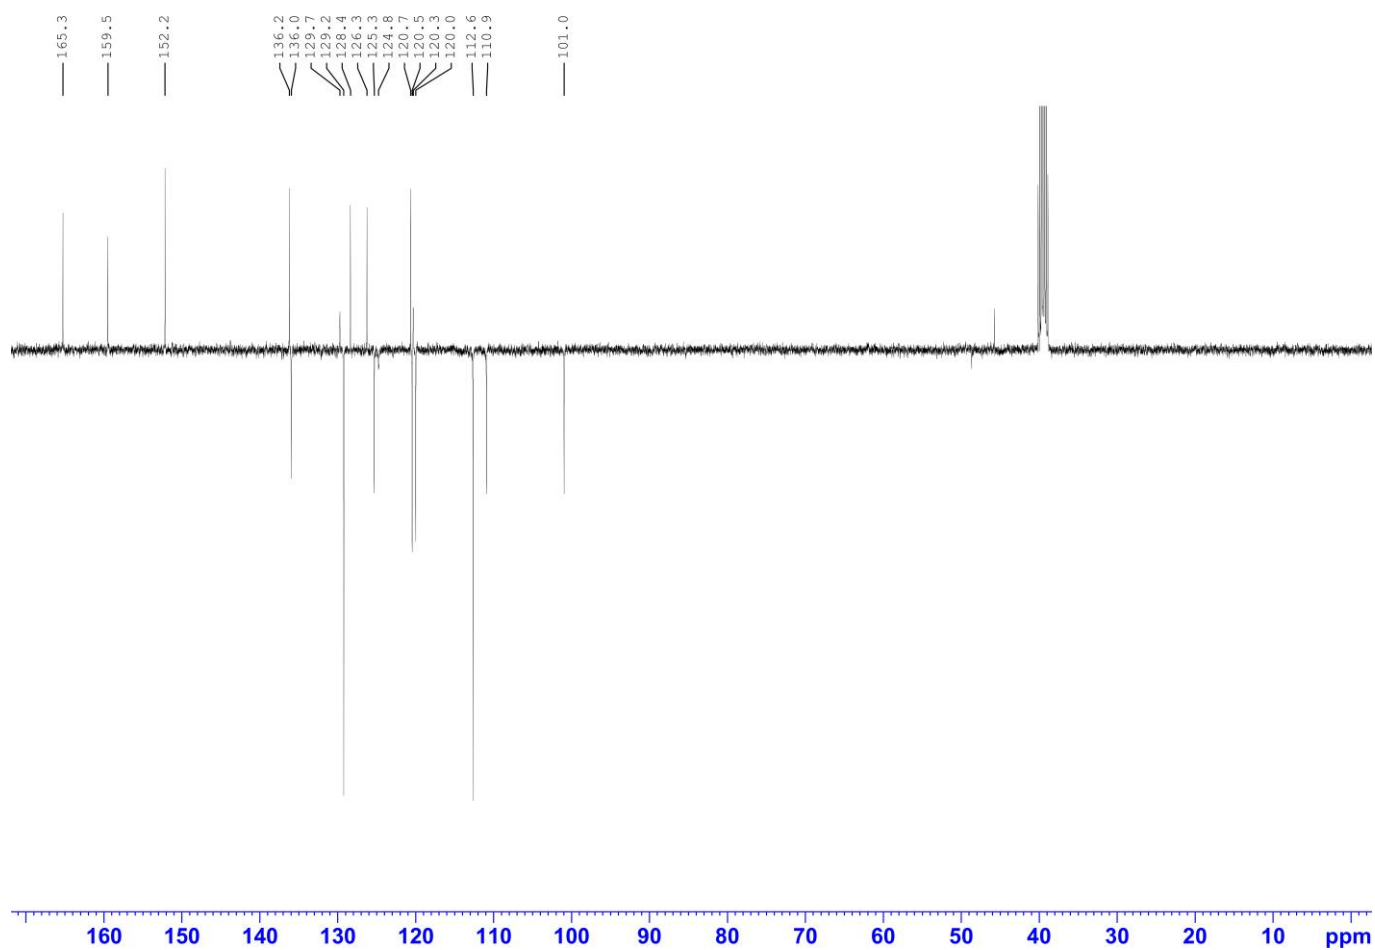



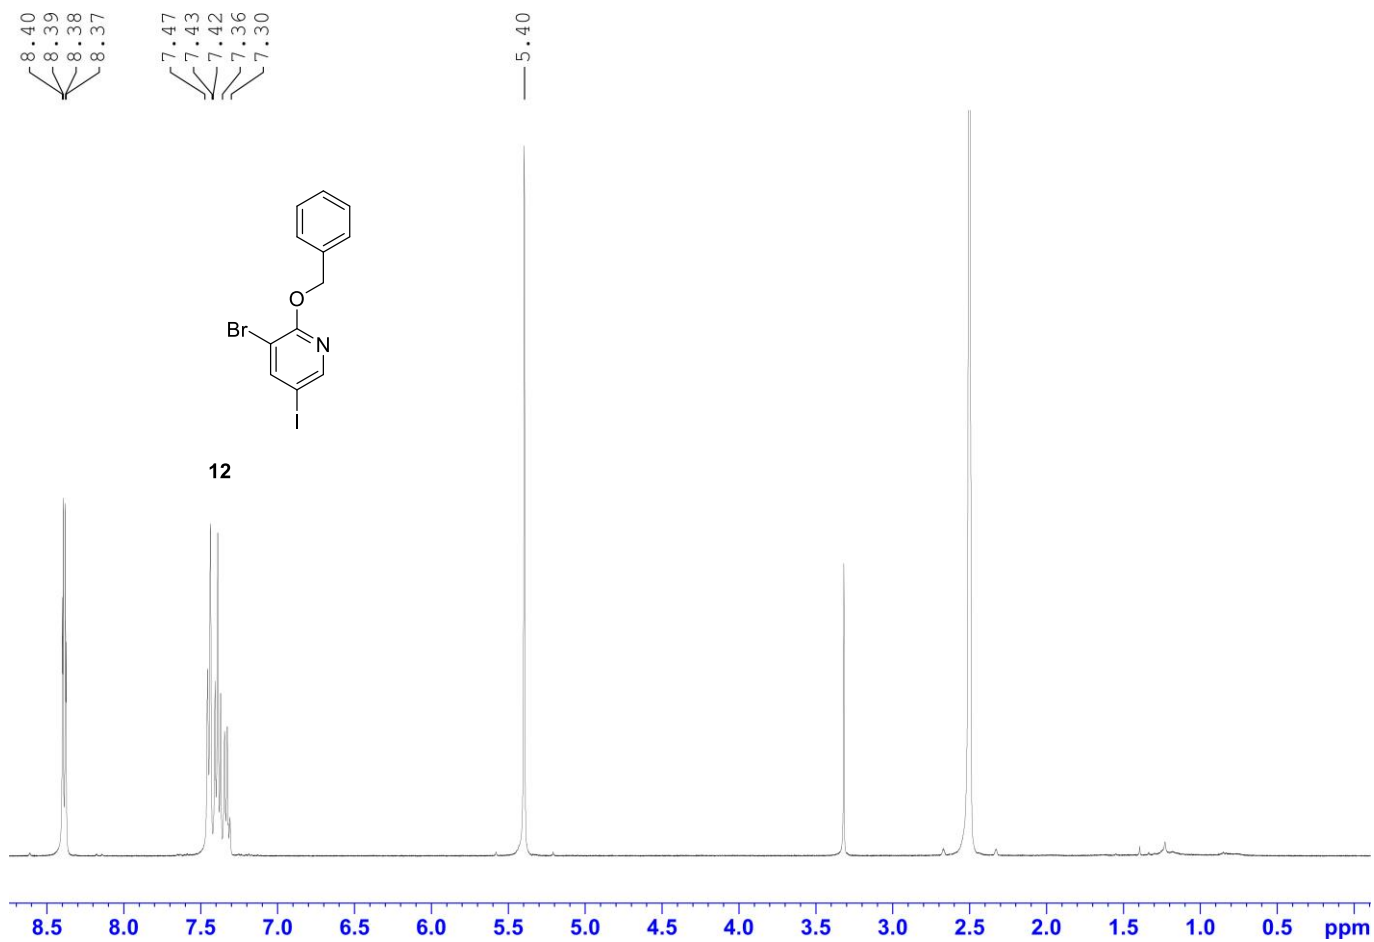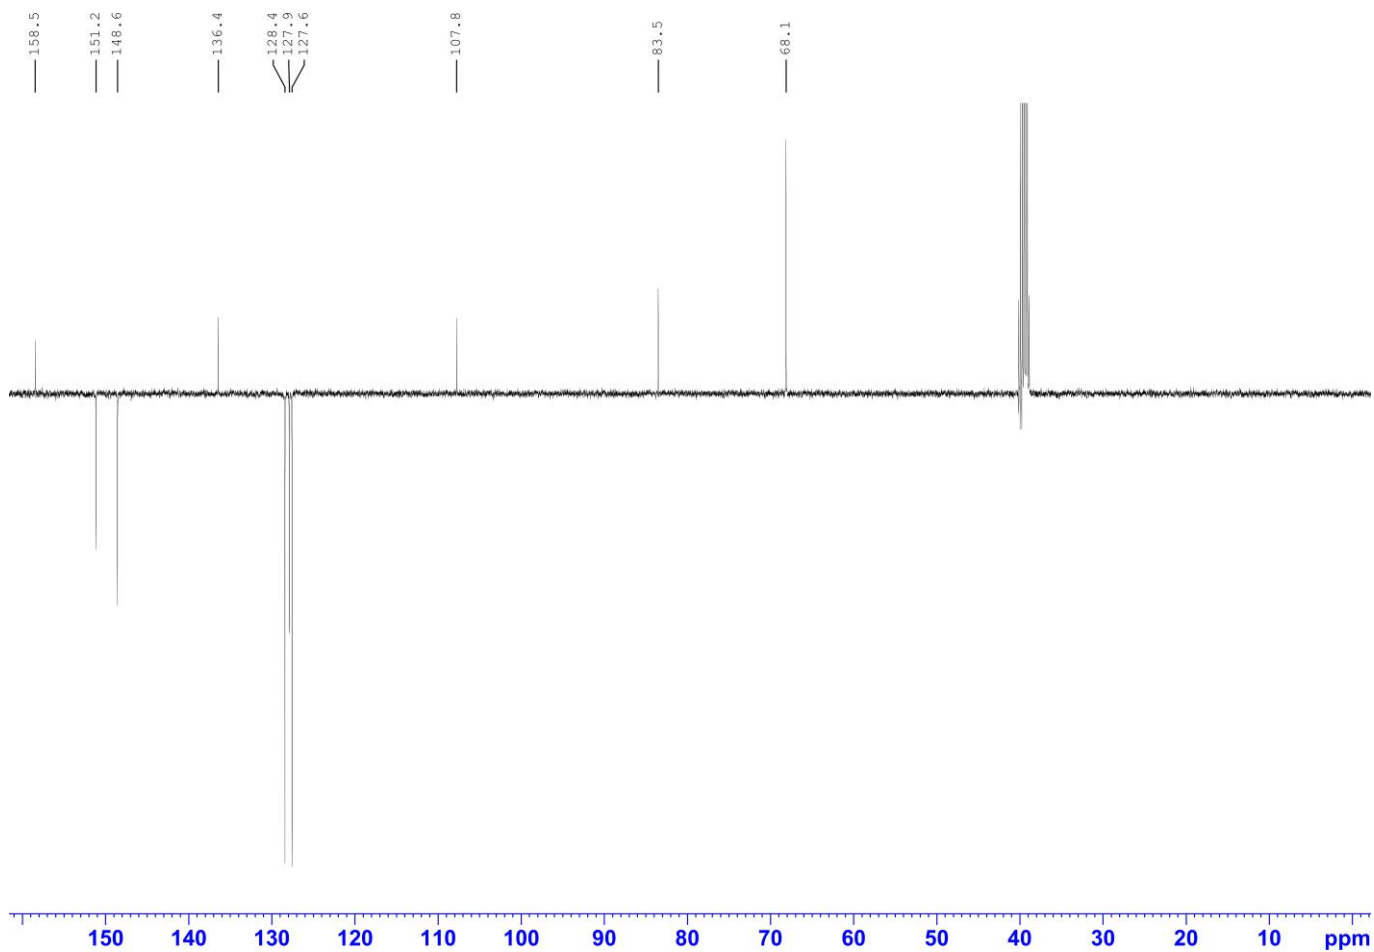

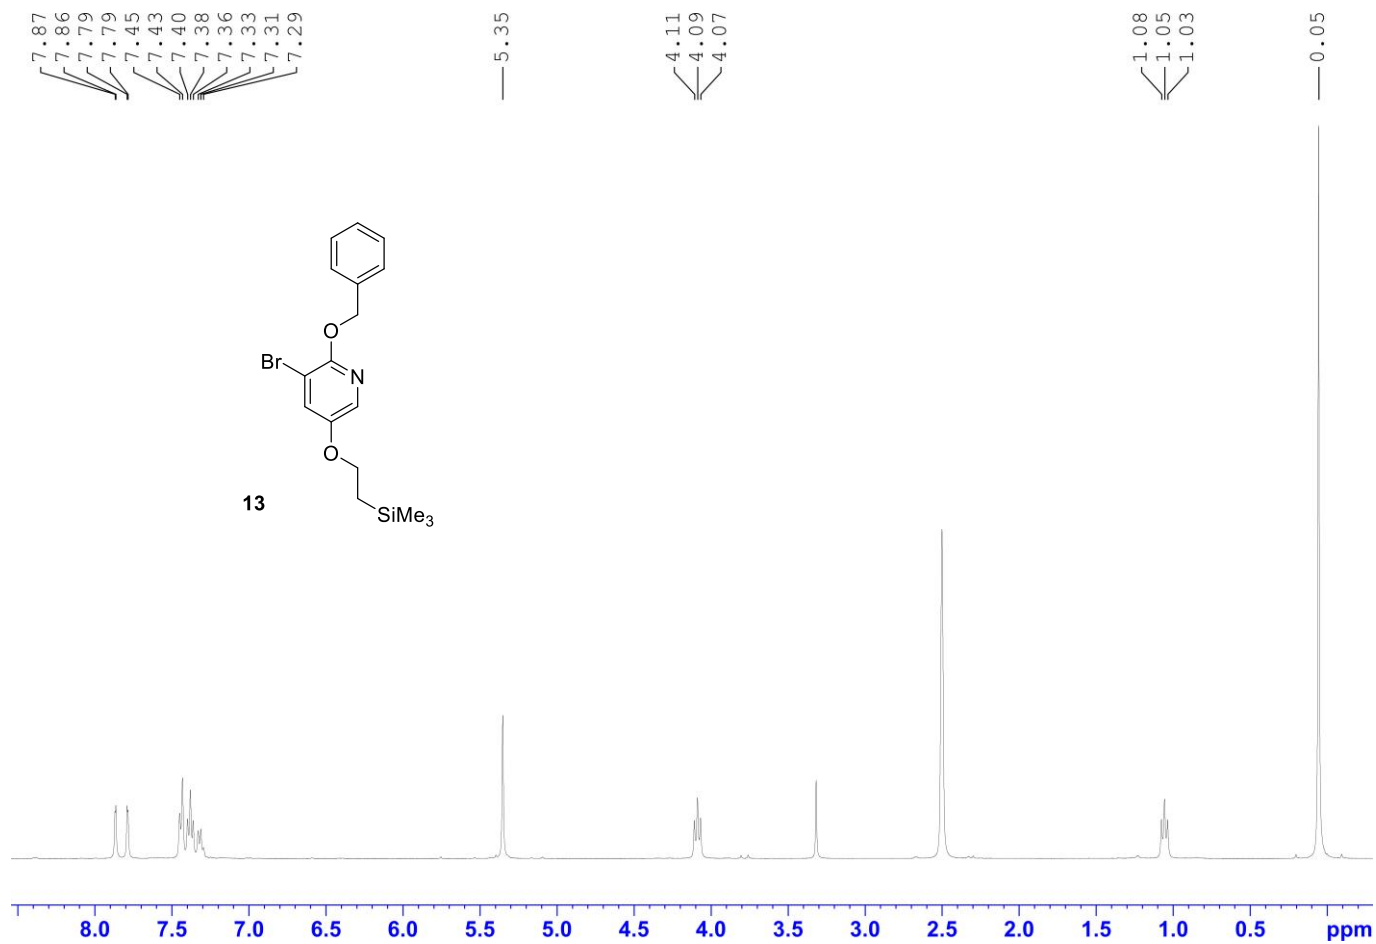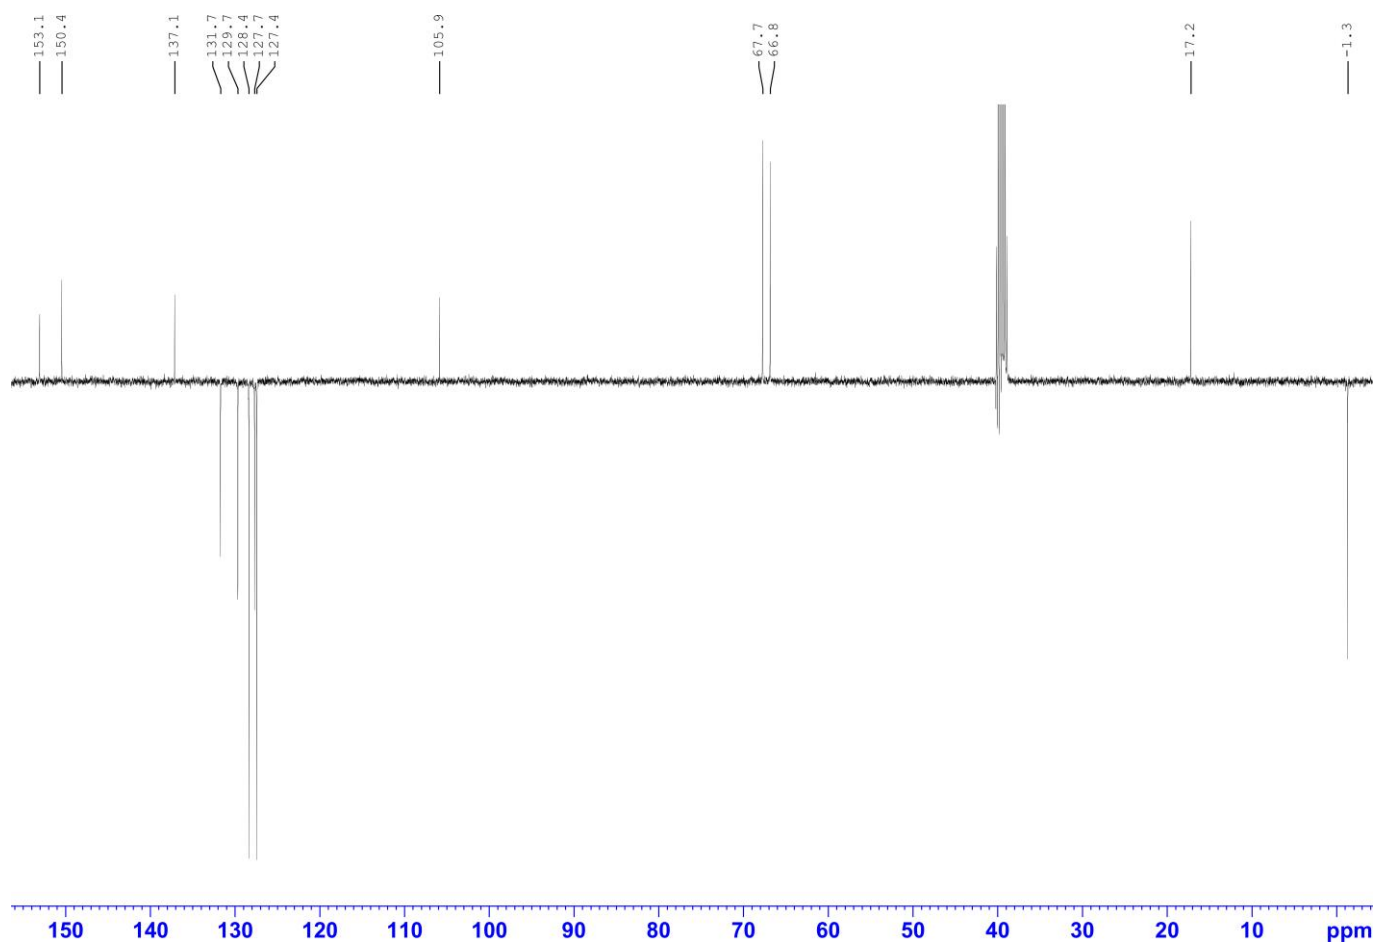

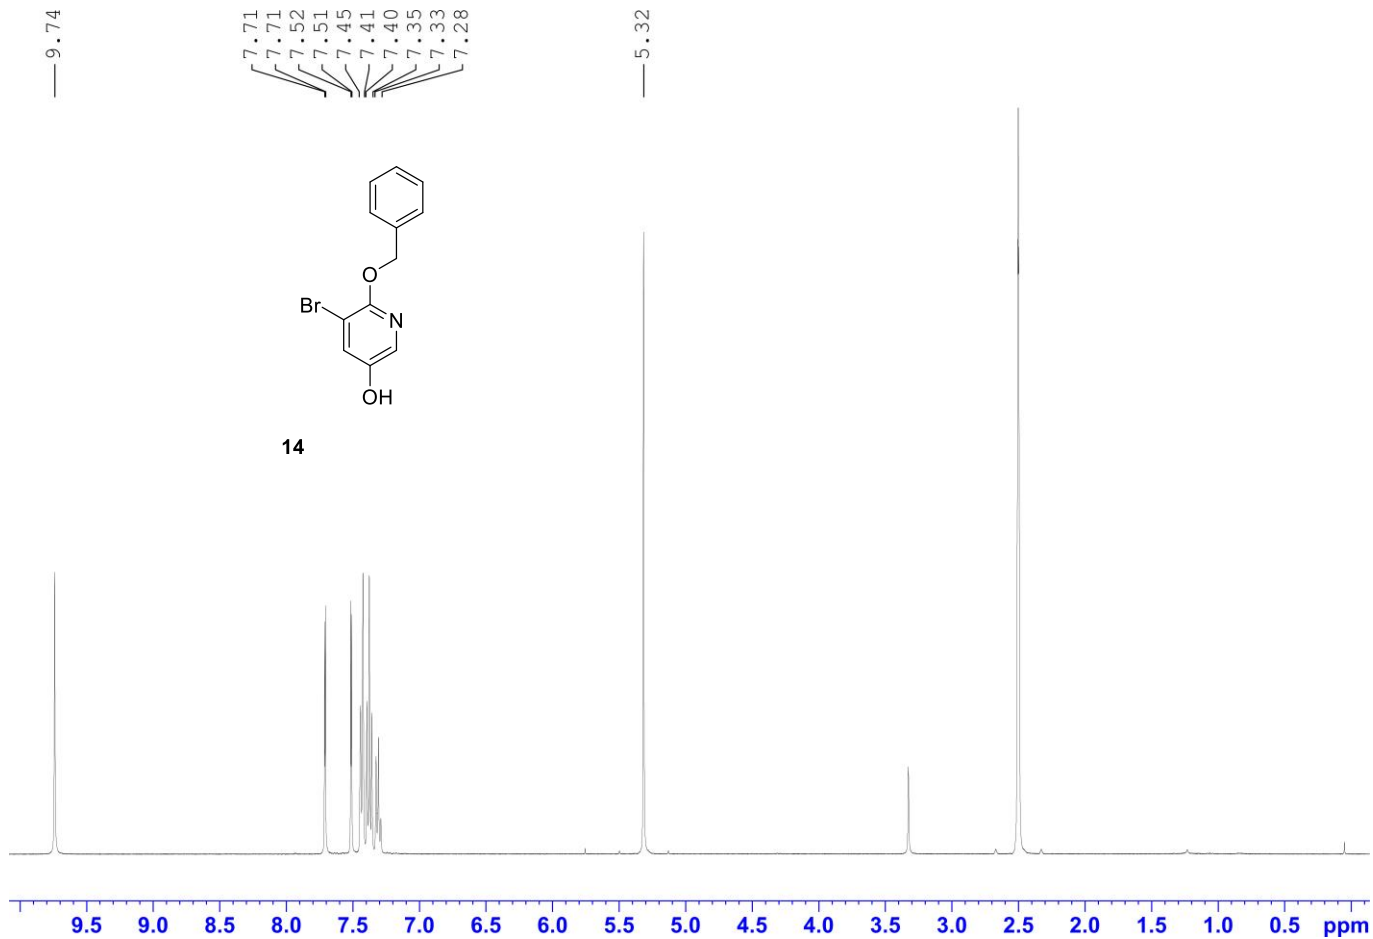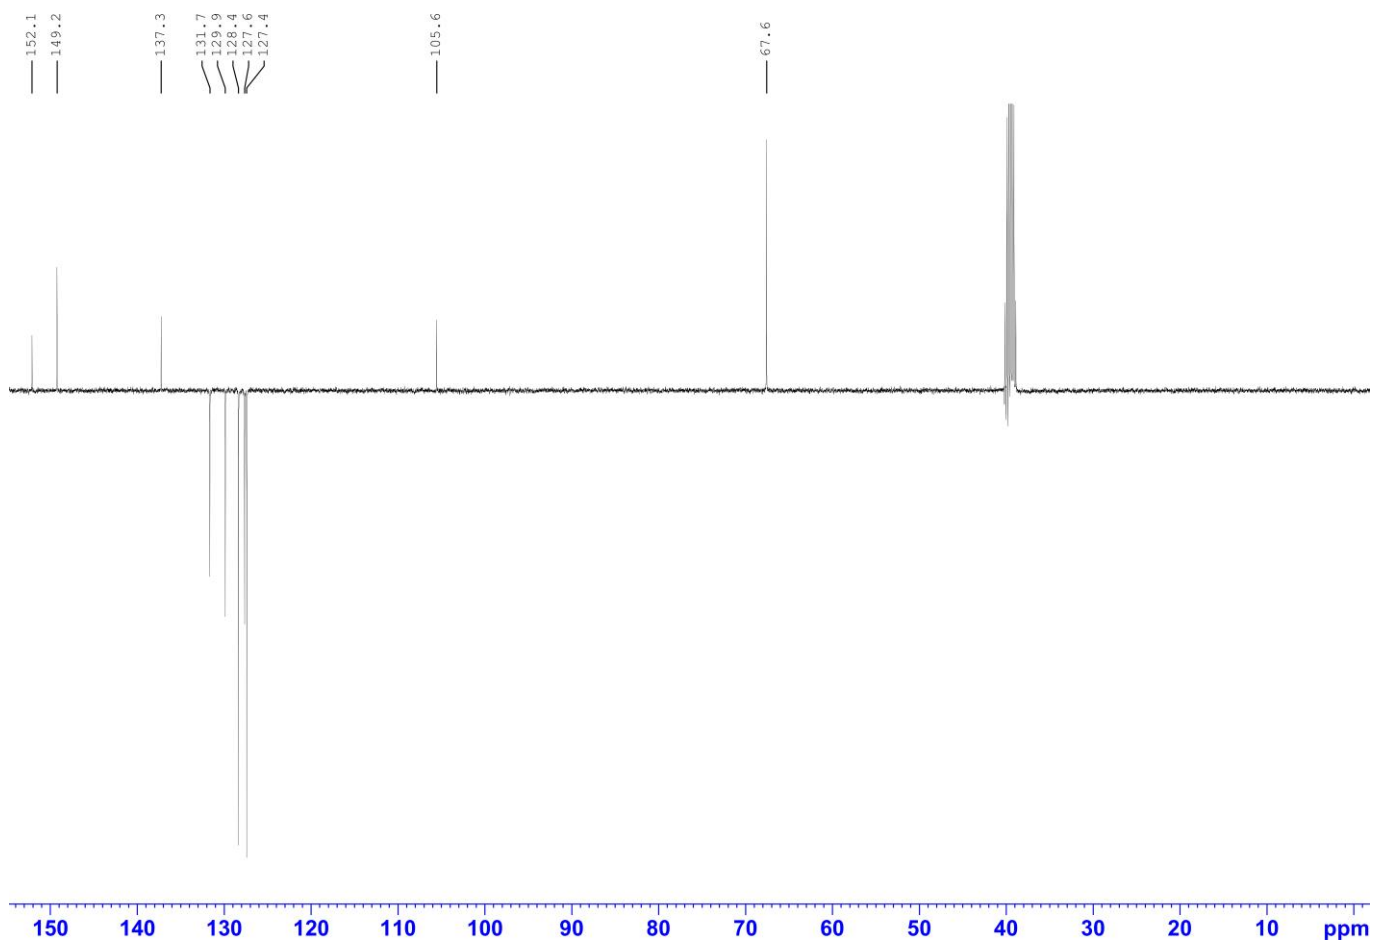

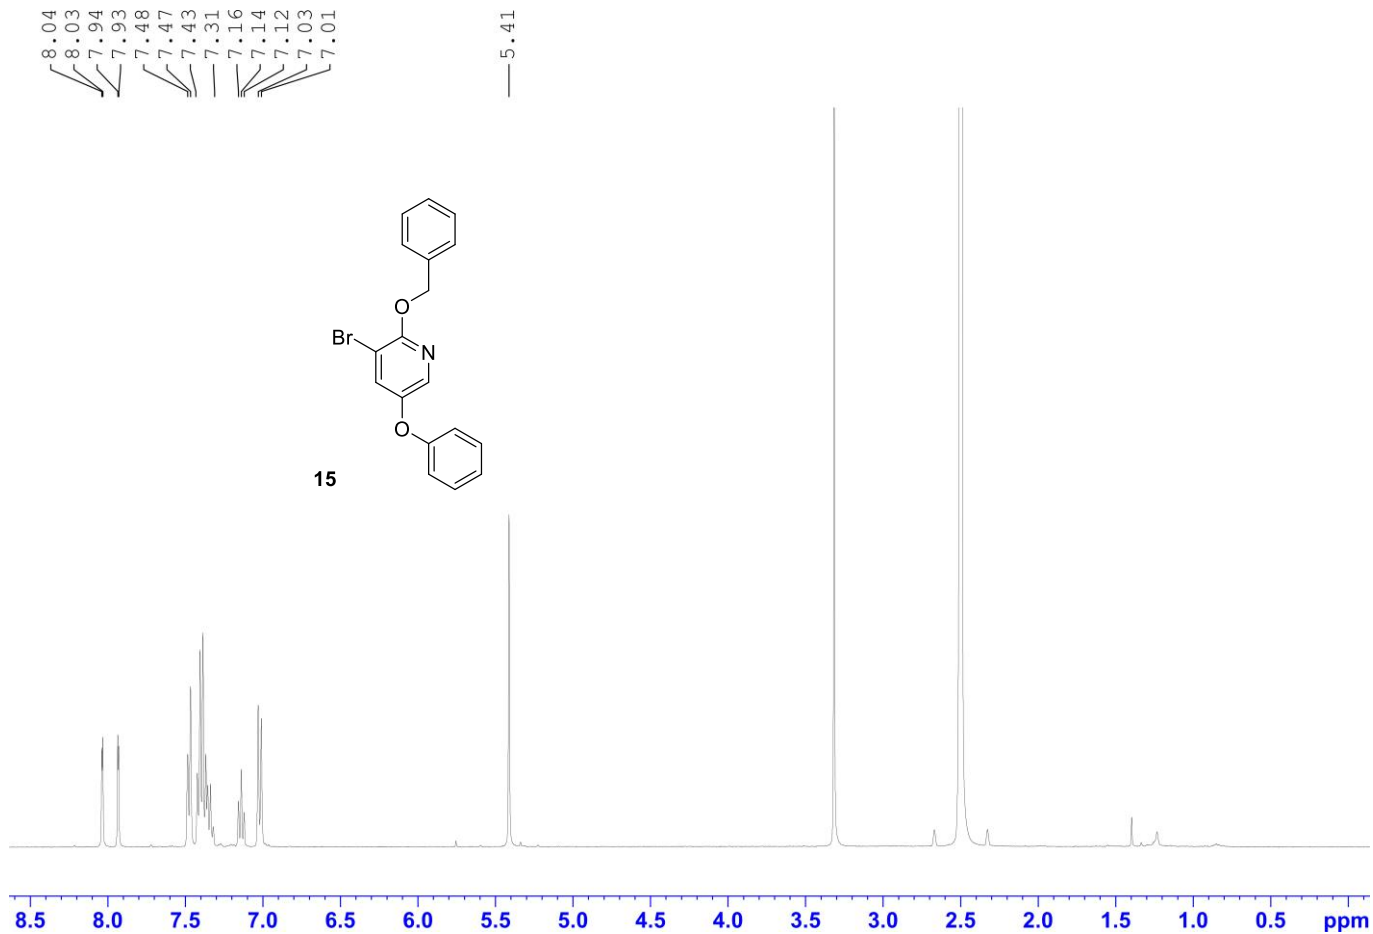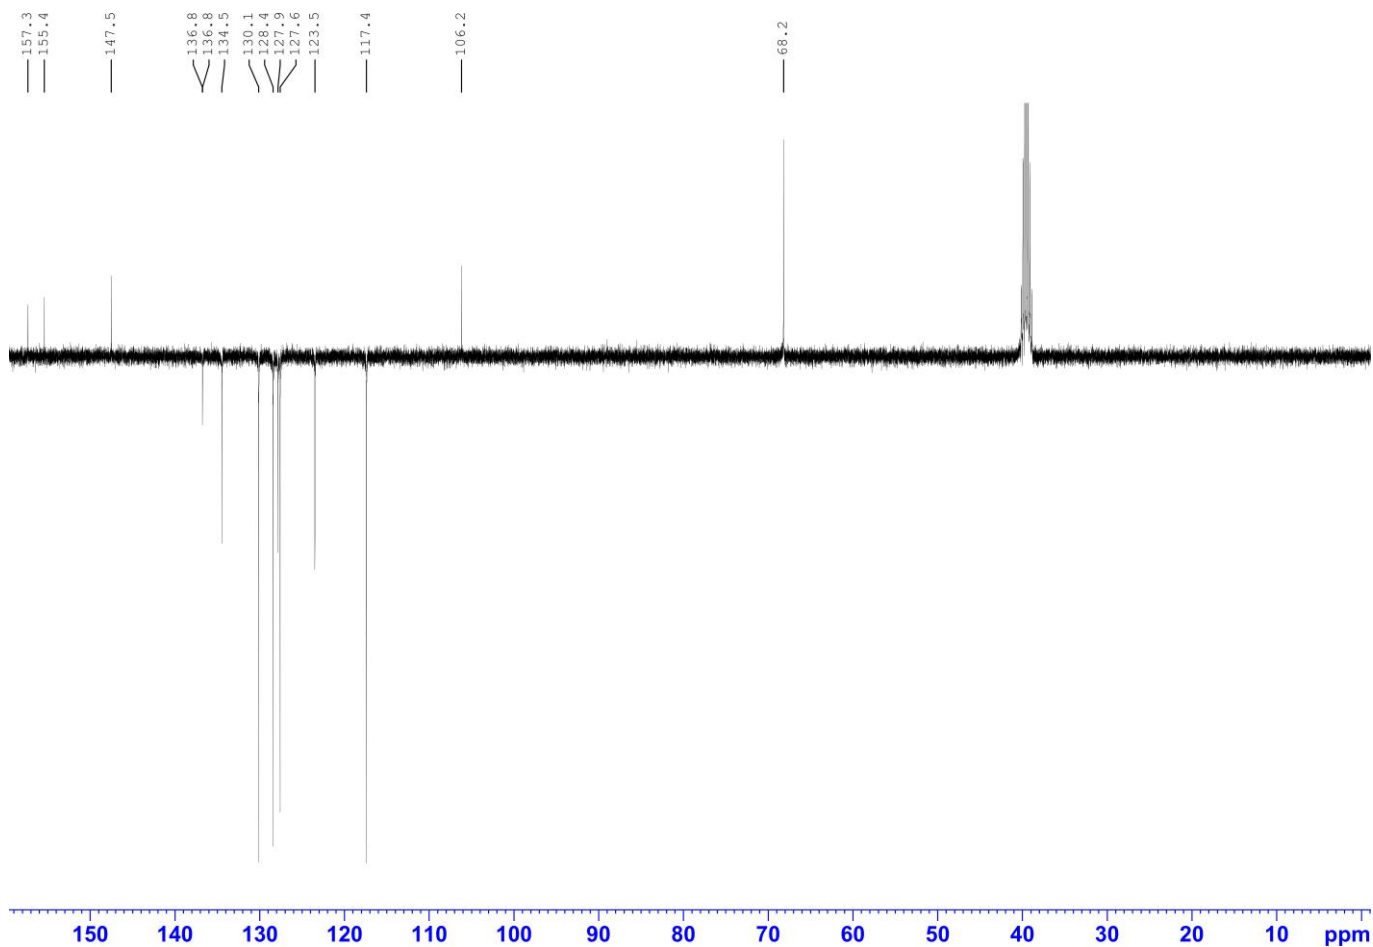

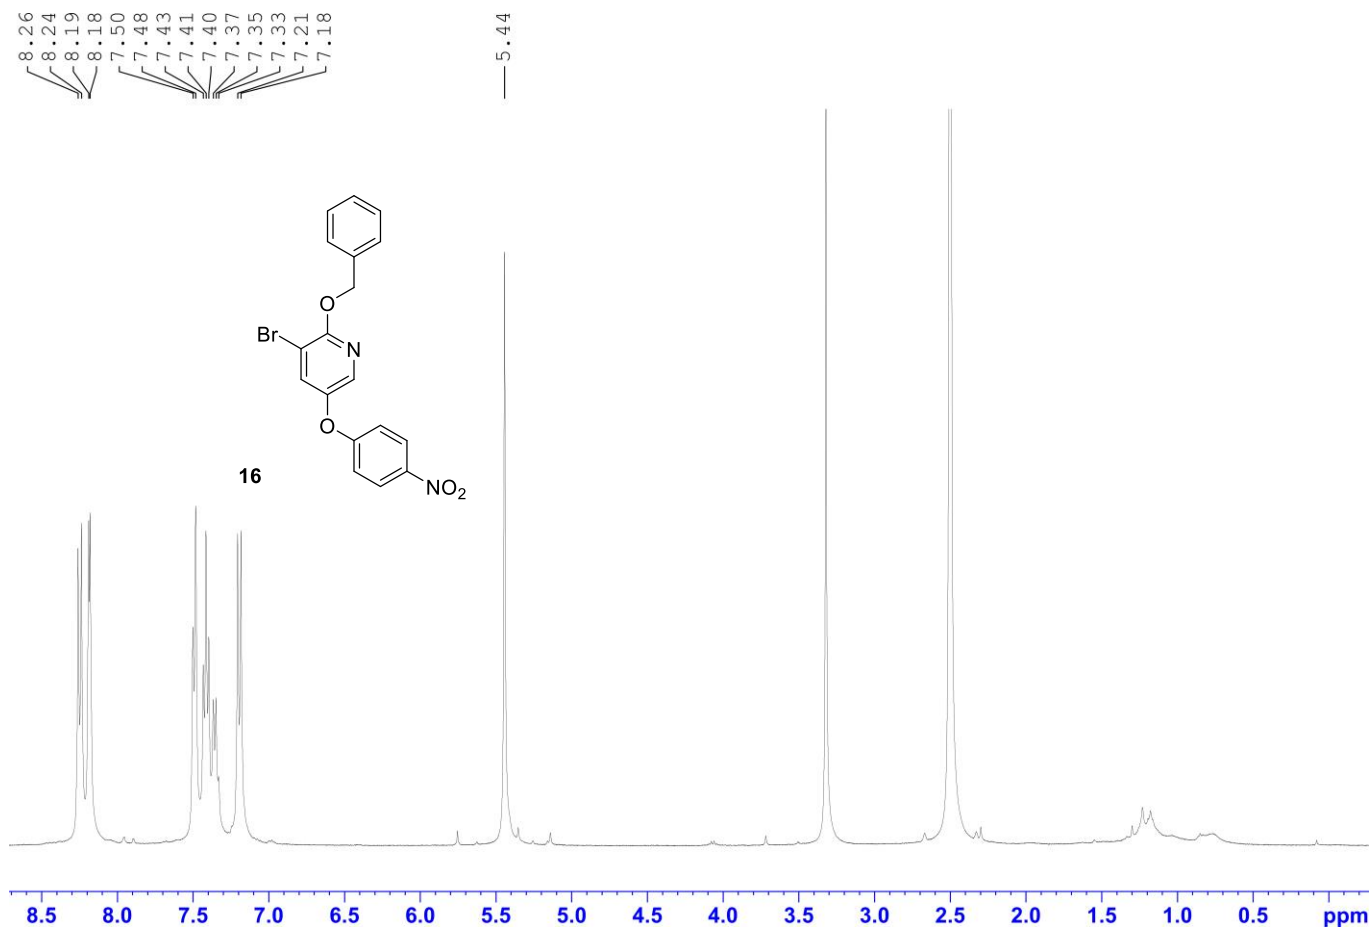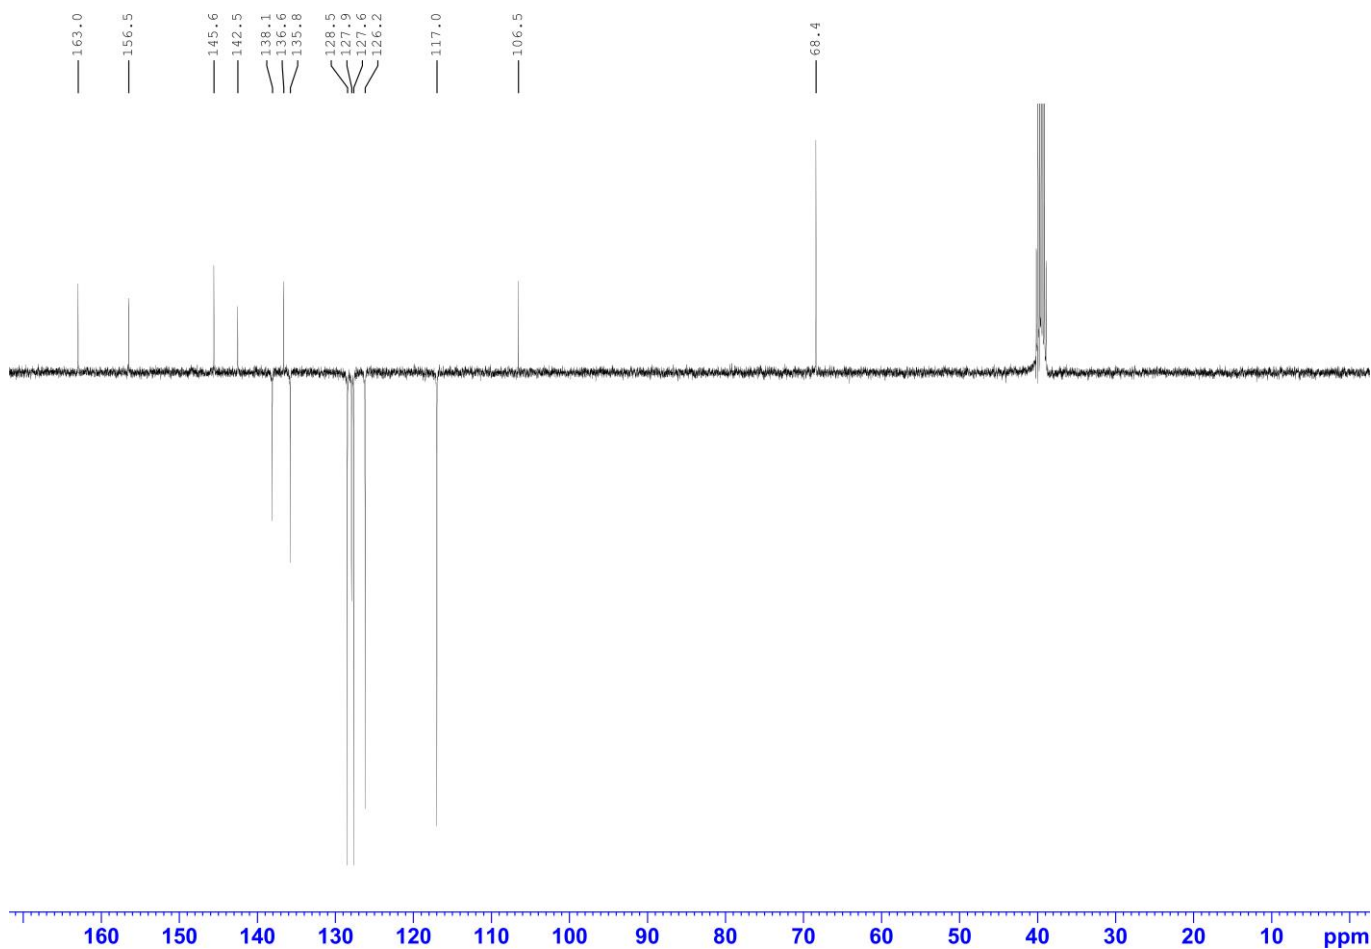

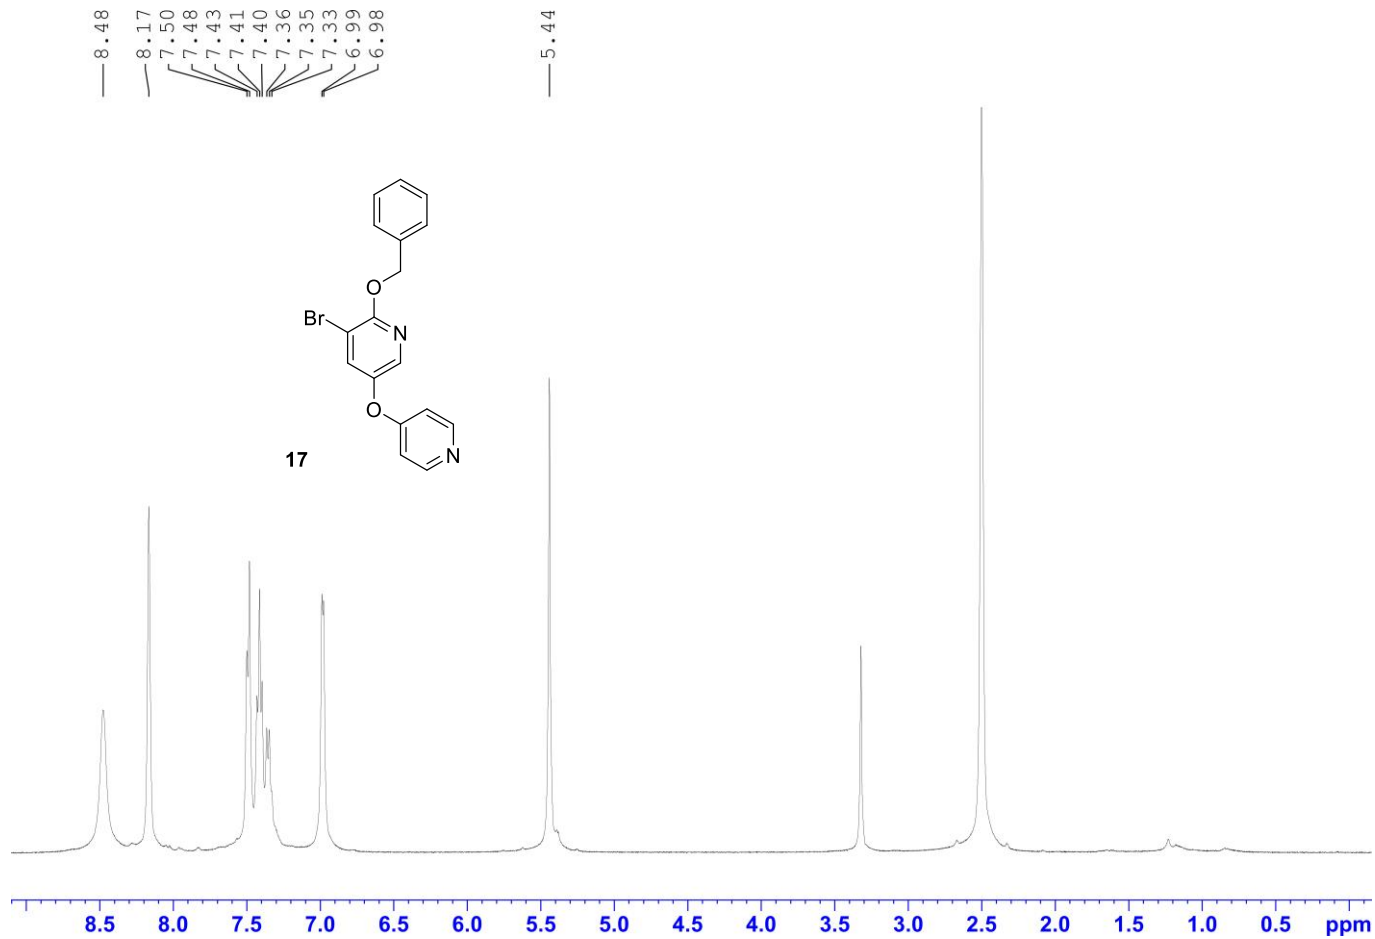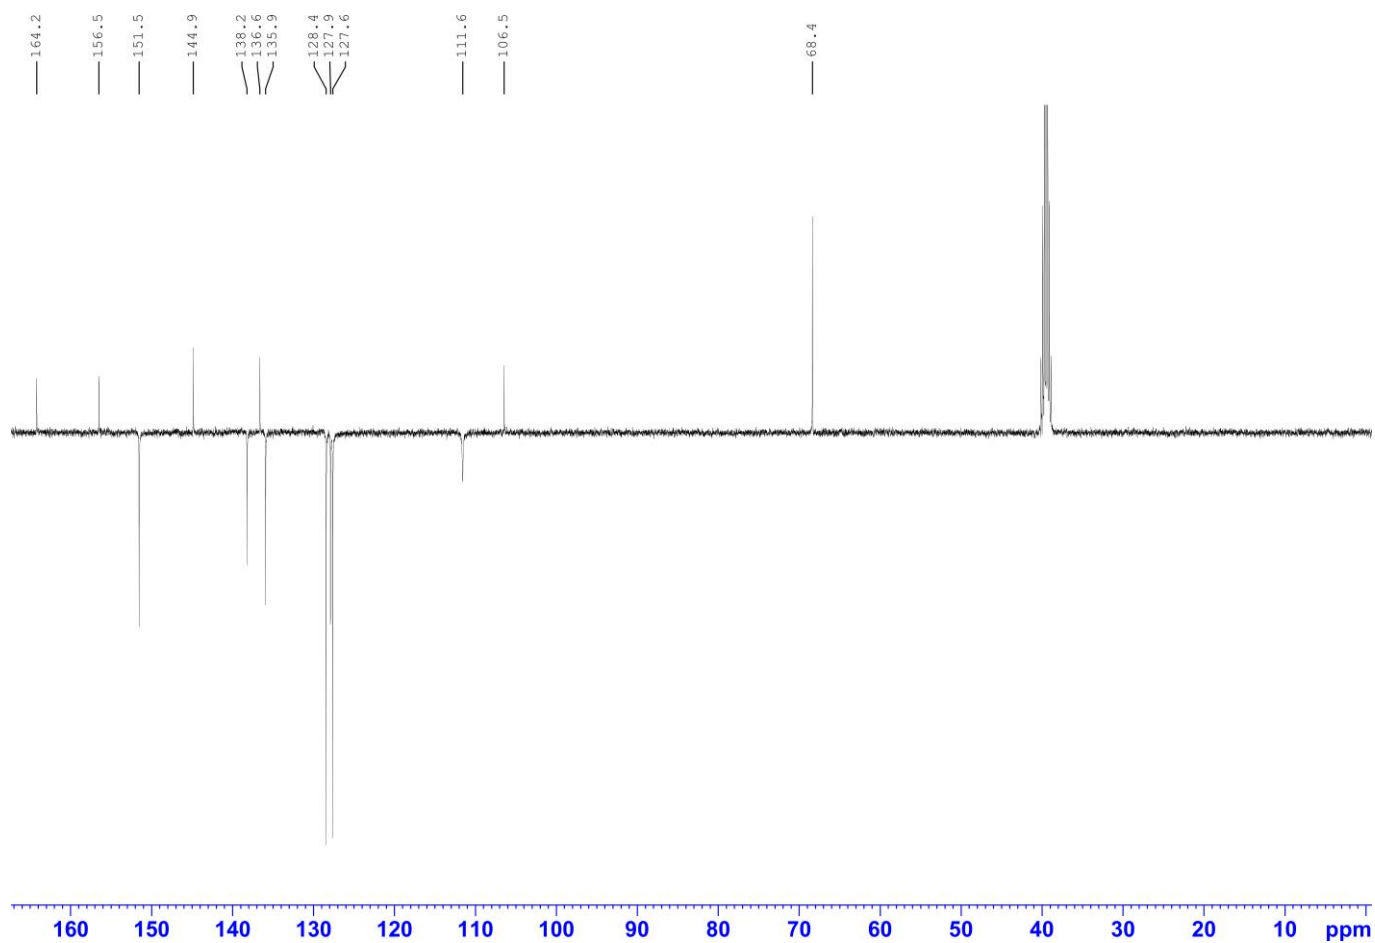

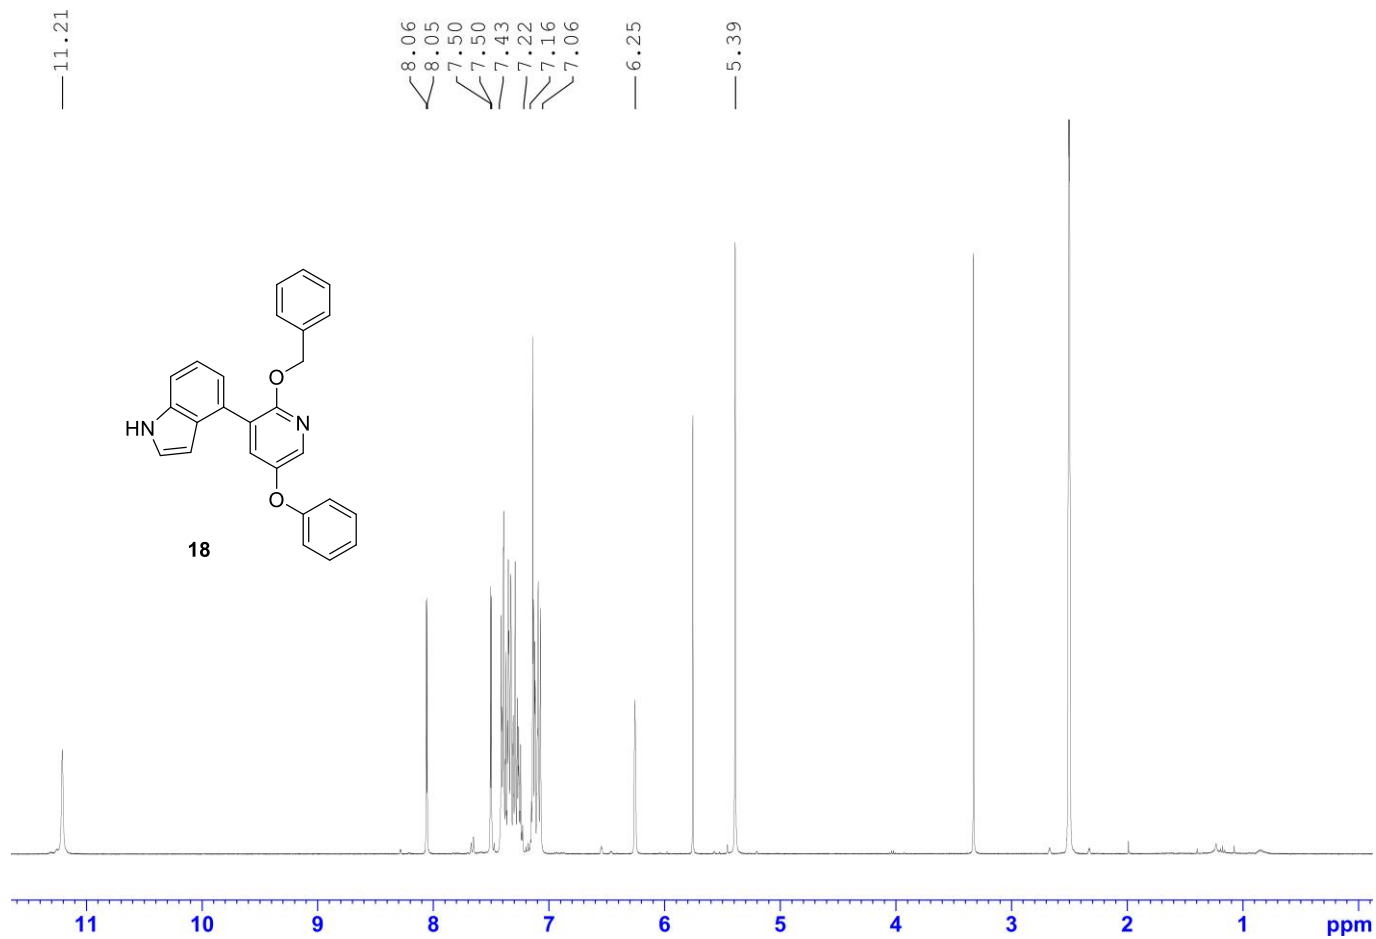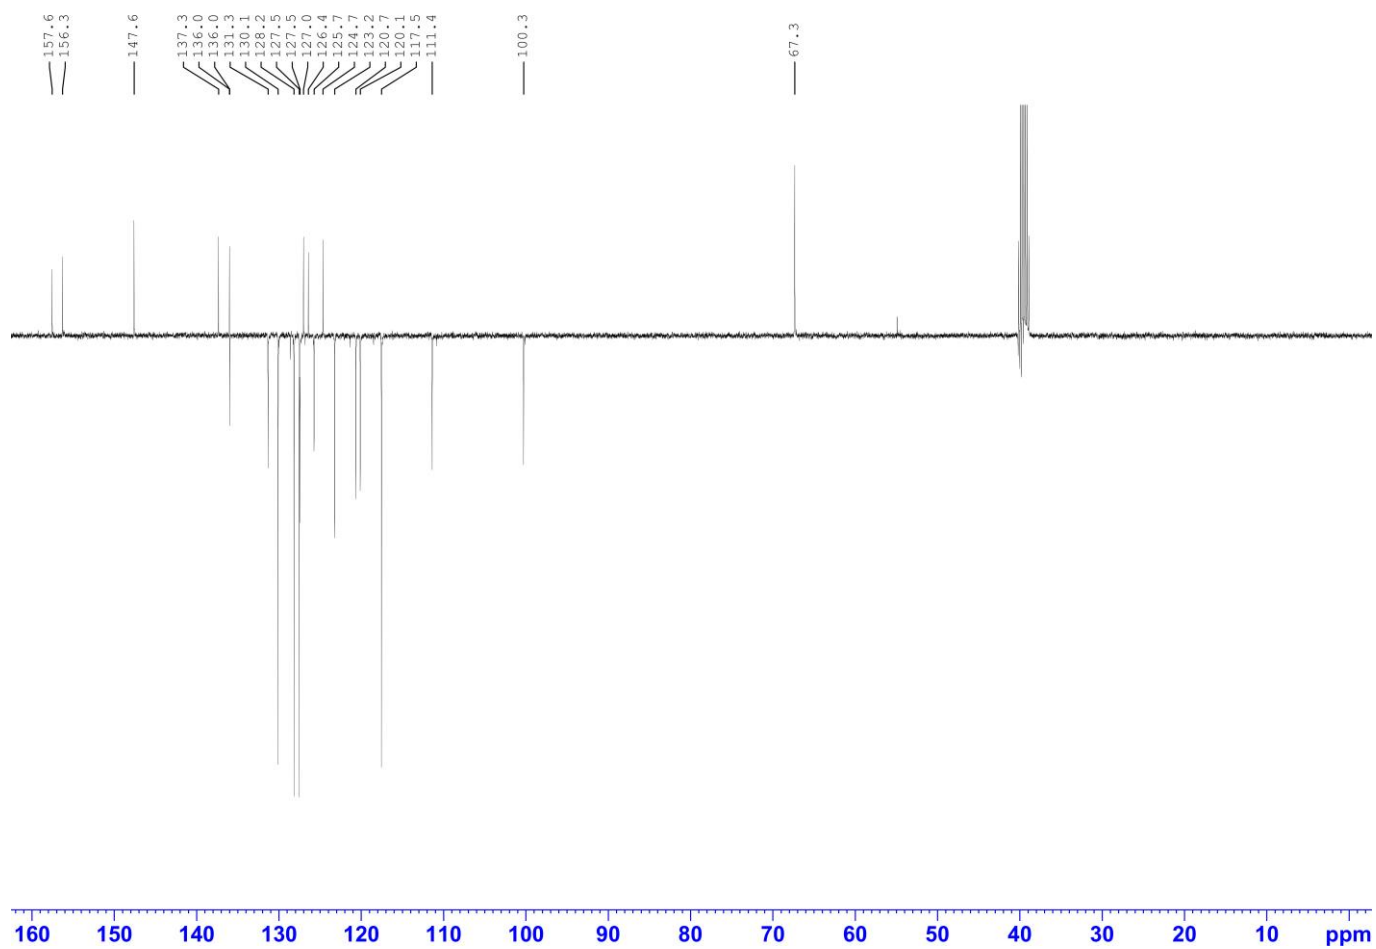

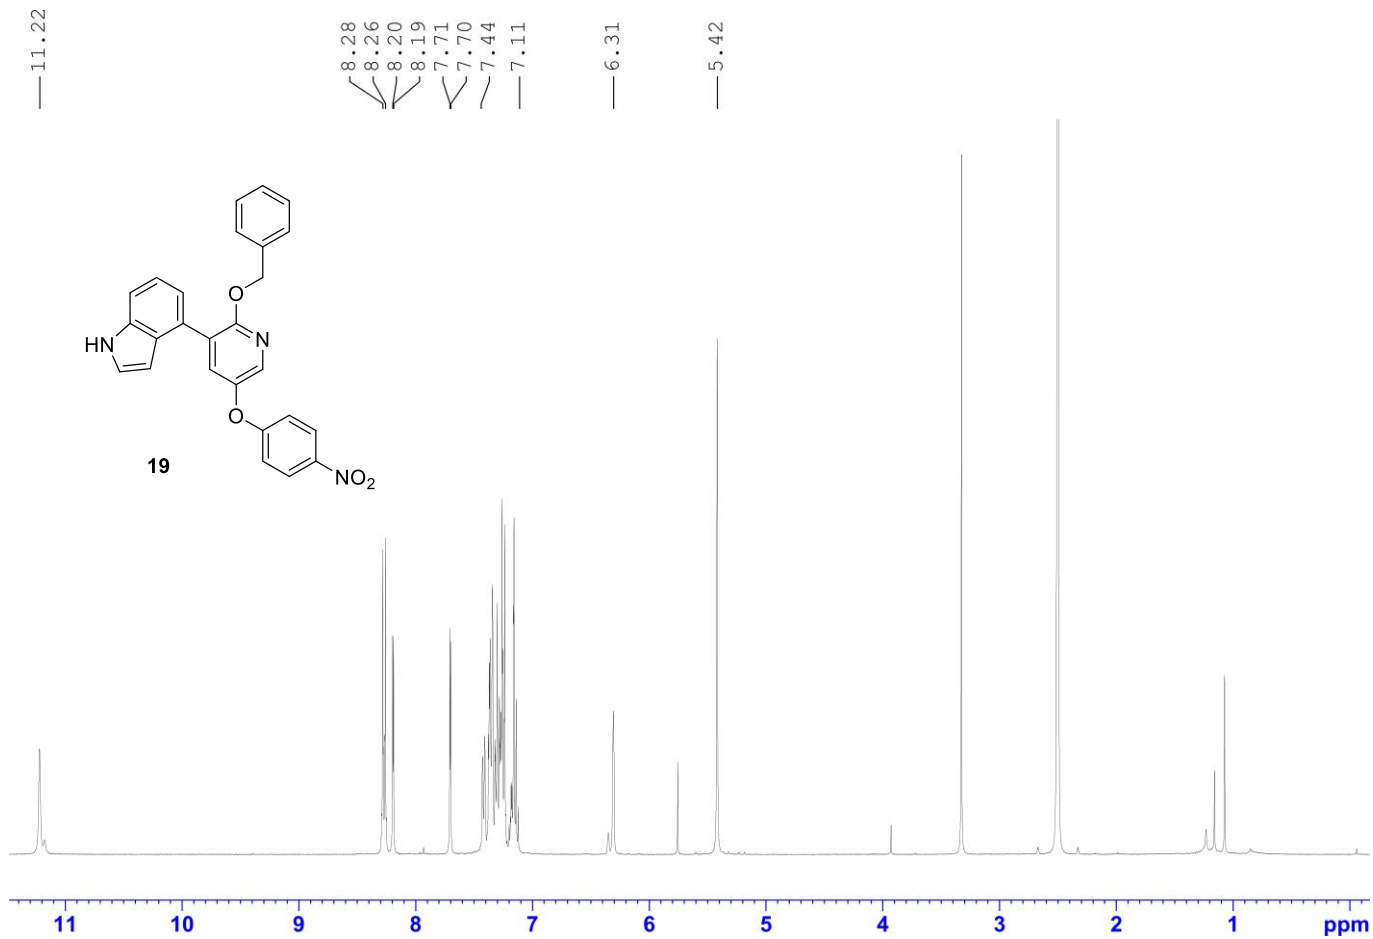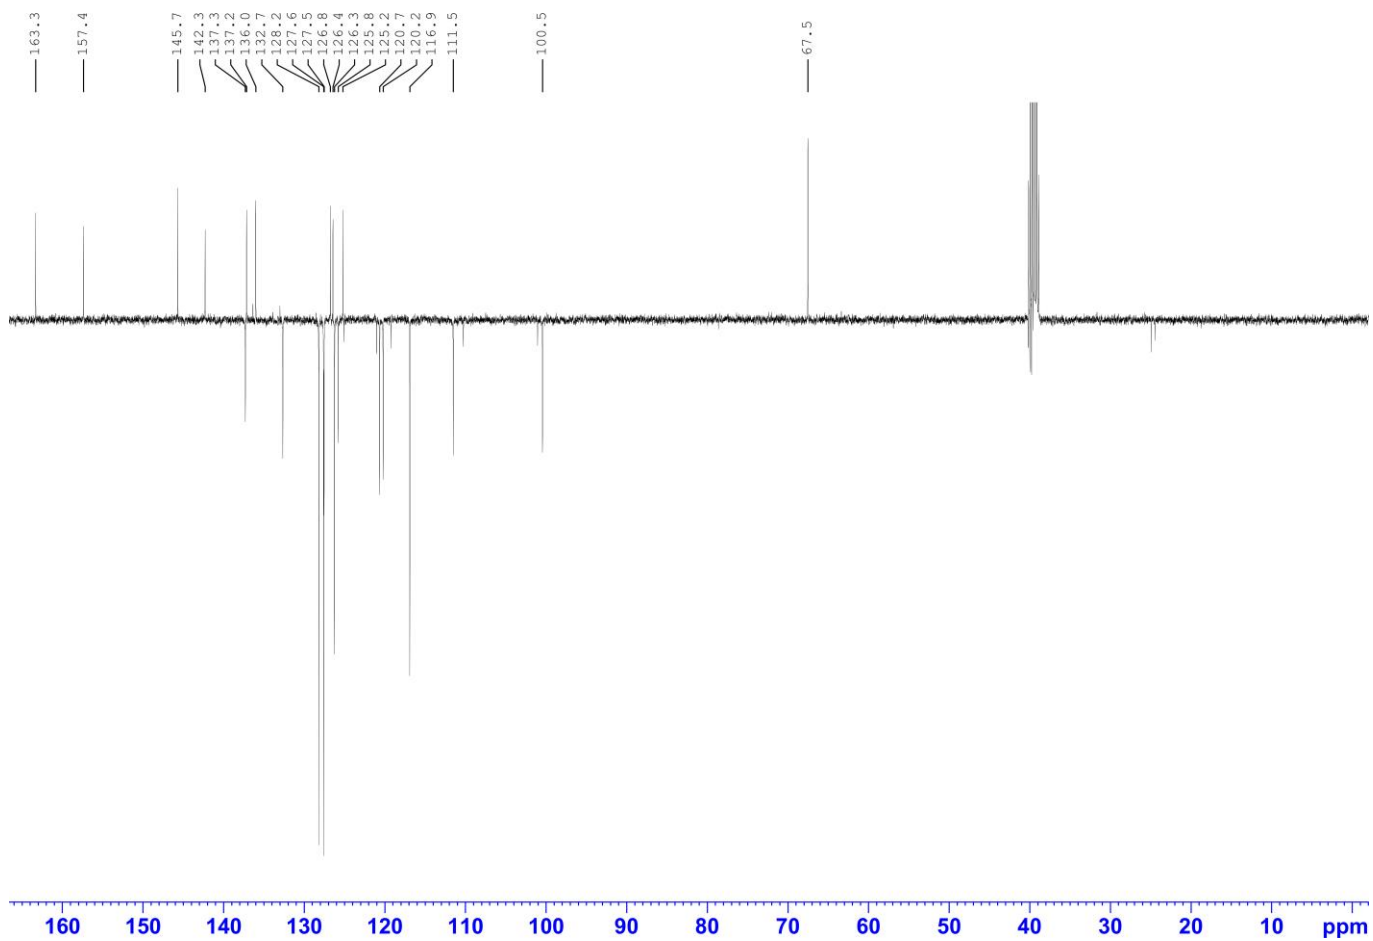



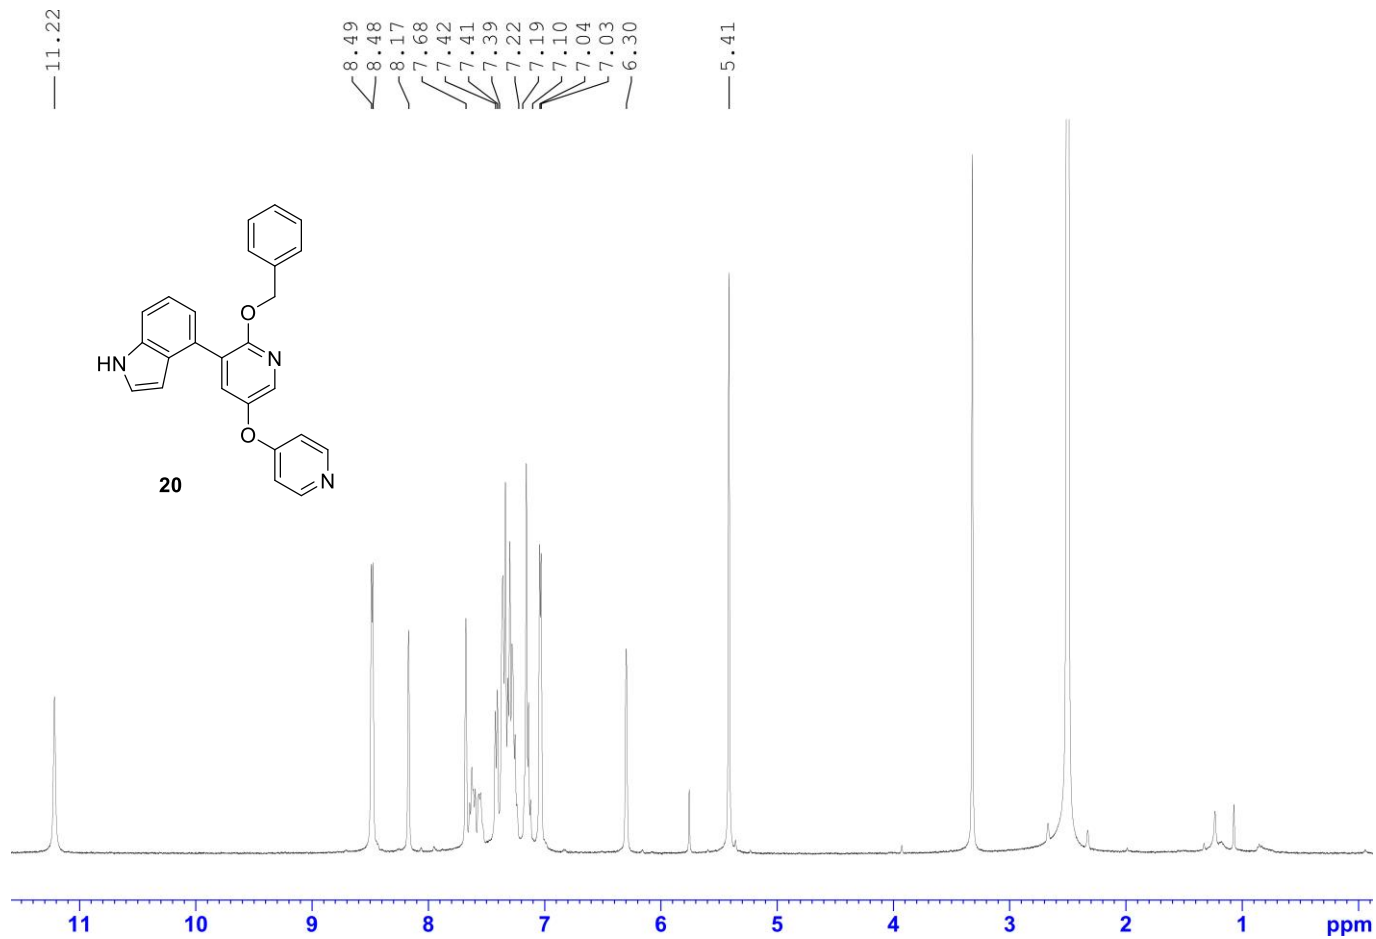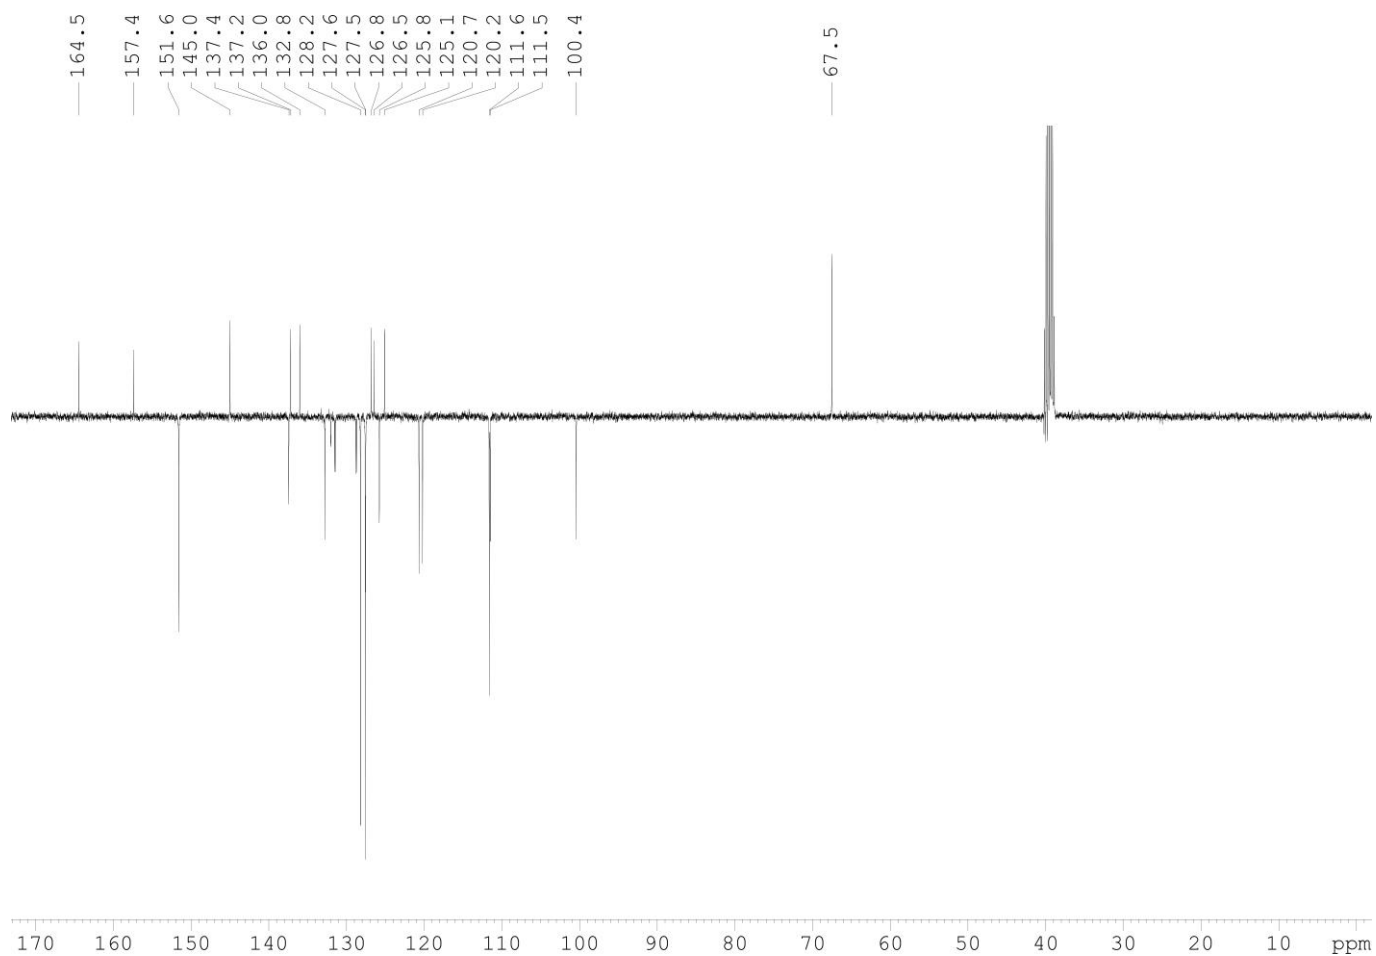

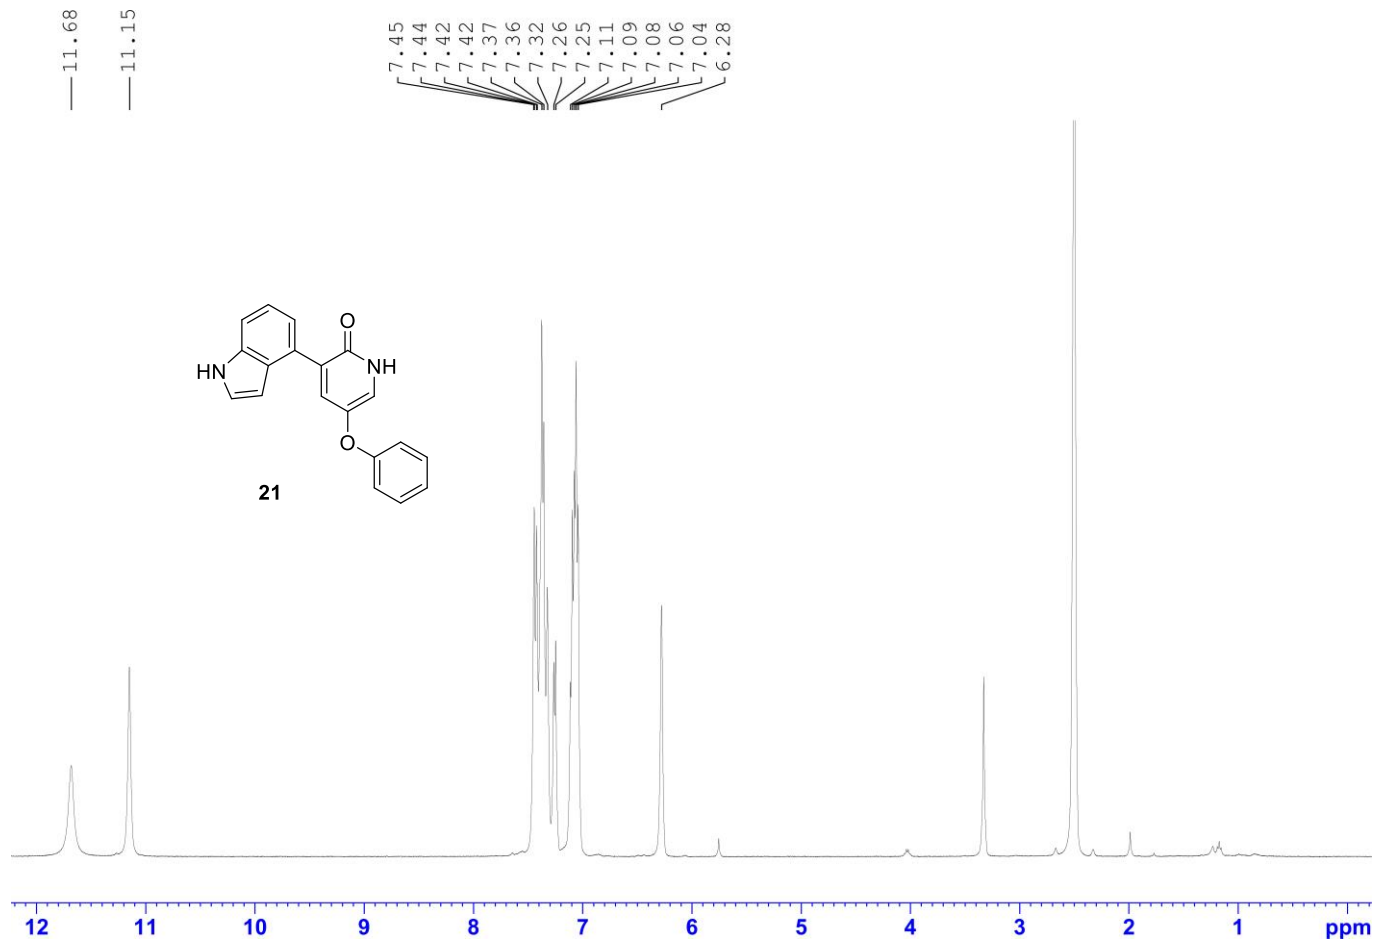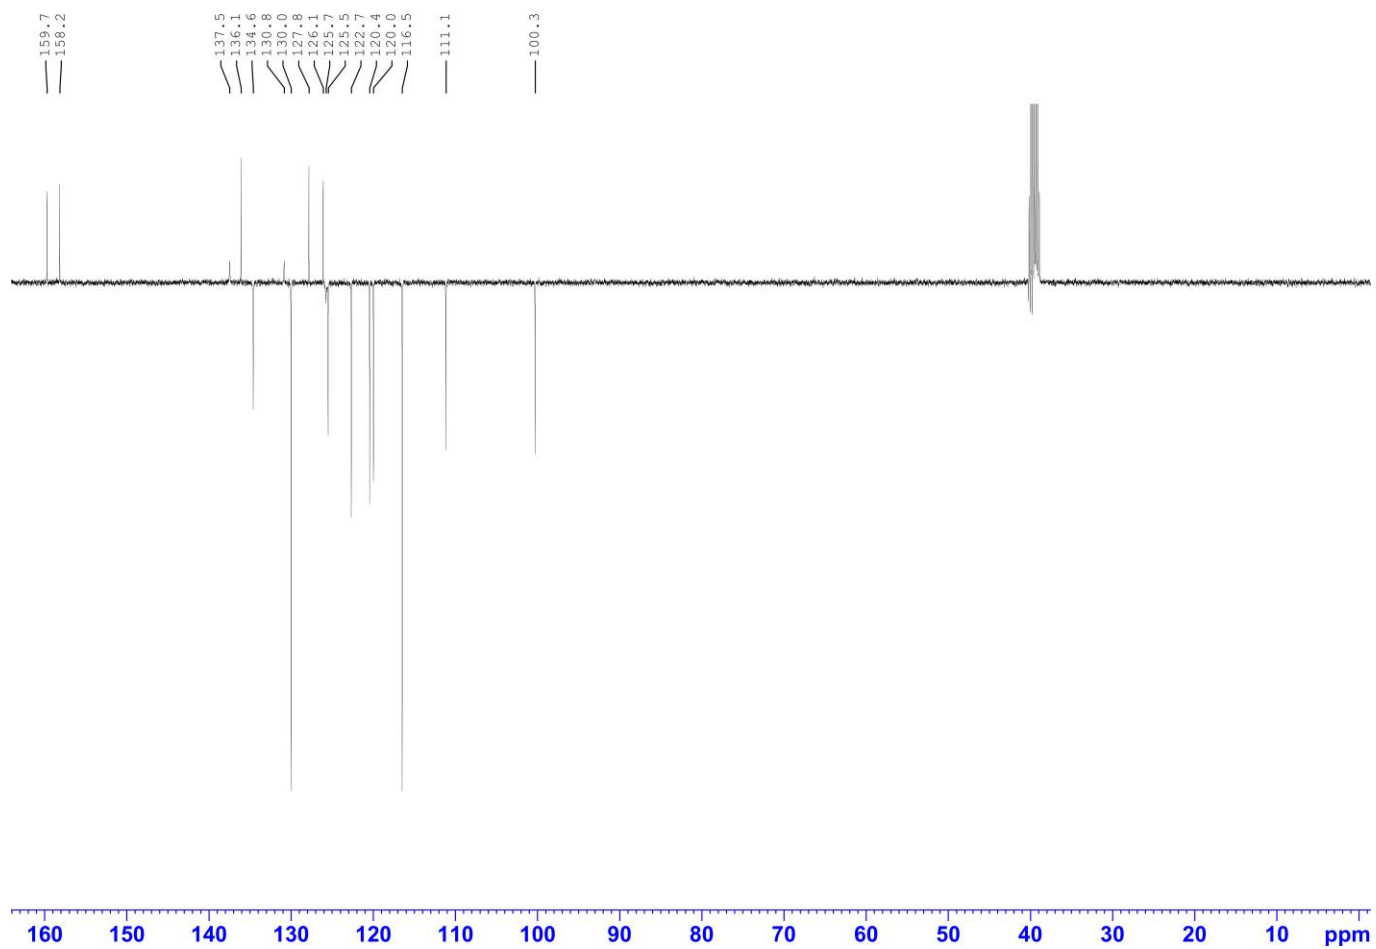

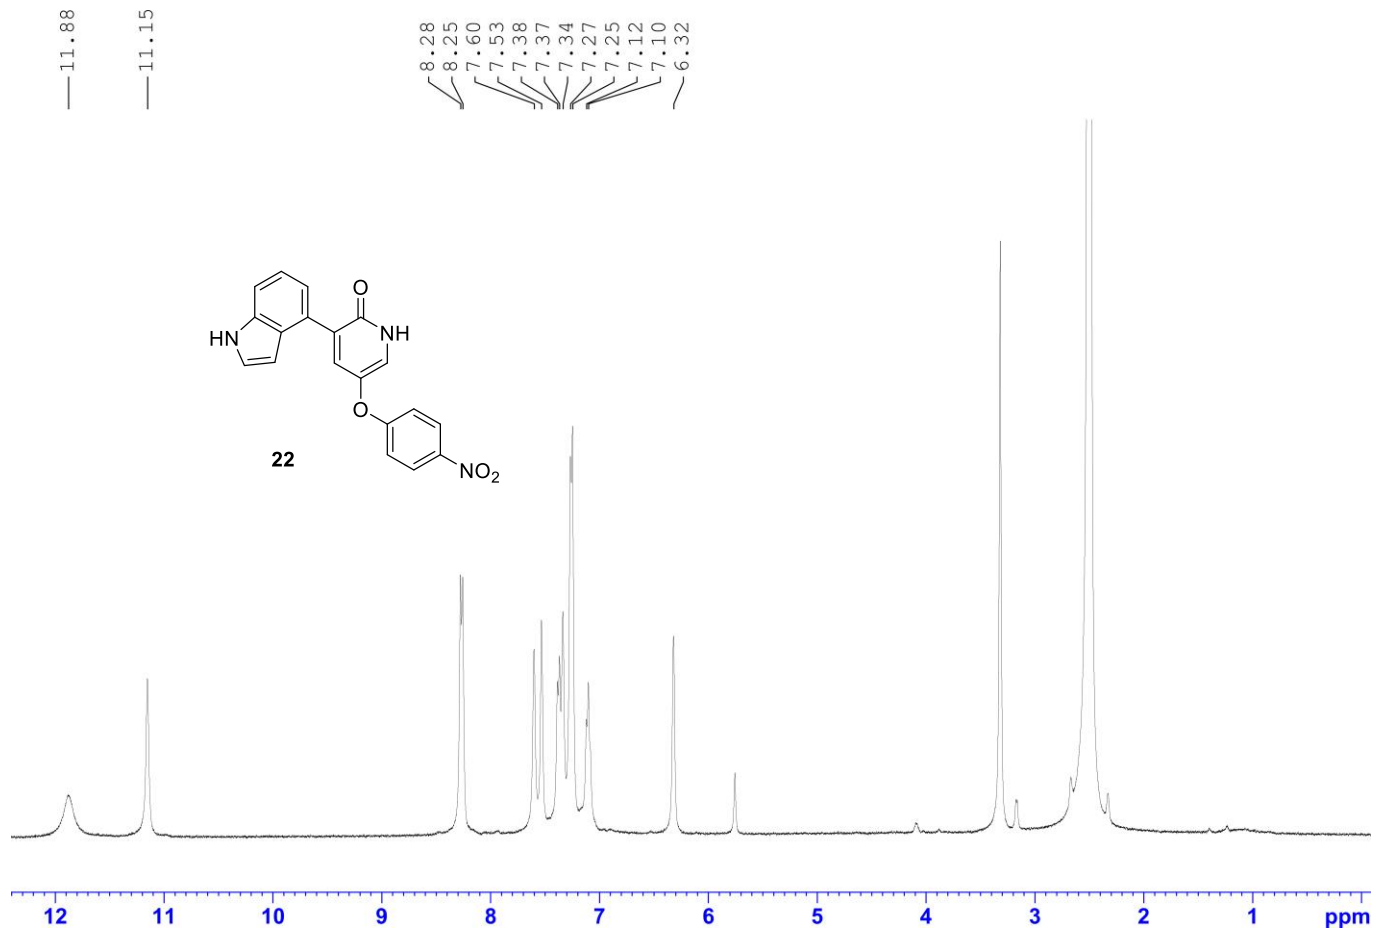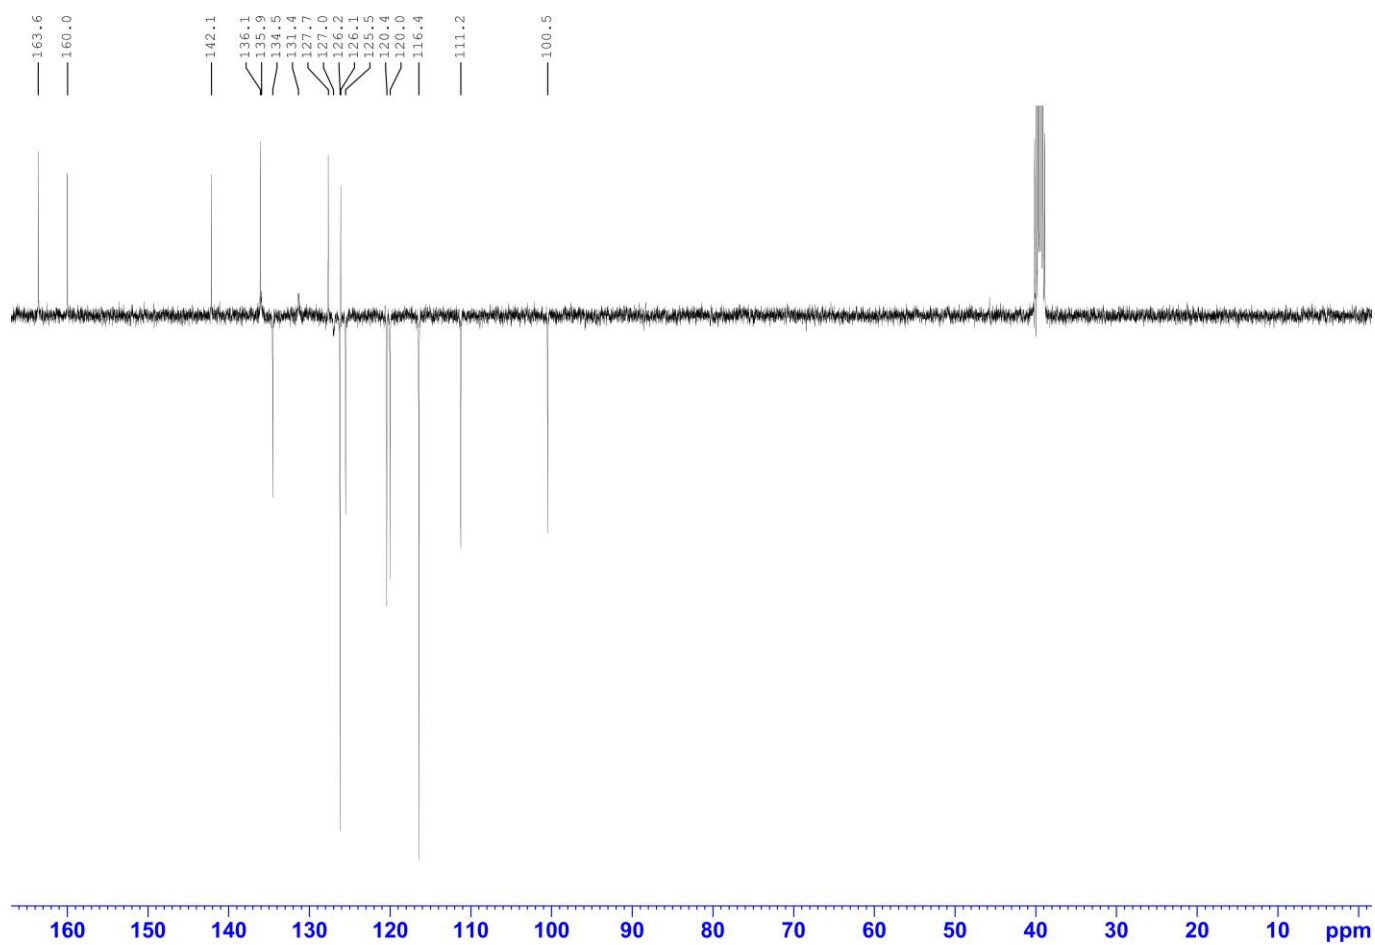

— 11.84

— 11.15

8.48  
8.48  
8.47  
8.46  
7.56  
7.50  
7.50  
7.38  
7.37  
7.33  
7.26  
7.25  
7.12  
7.10  
7.08  
7.06  
7.05  
7.04  
6.31

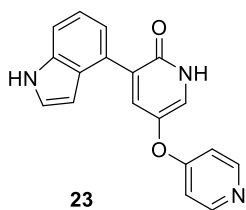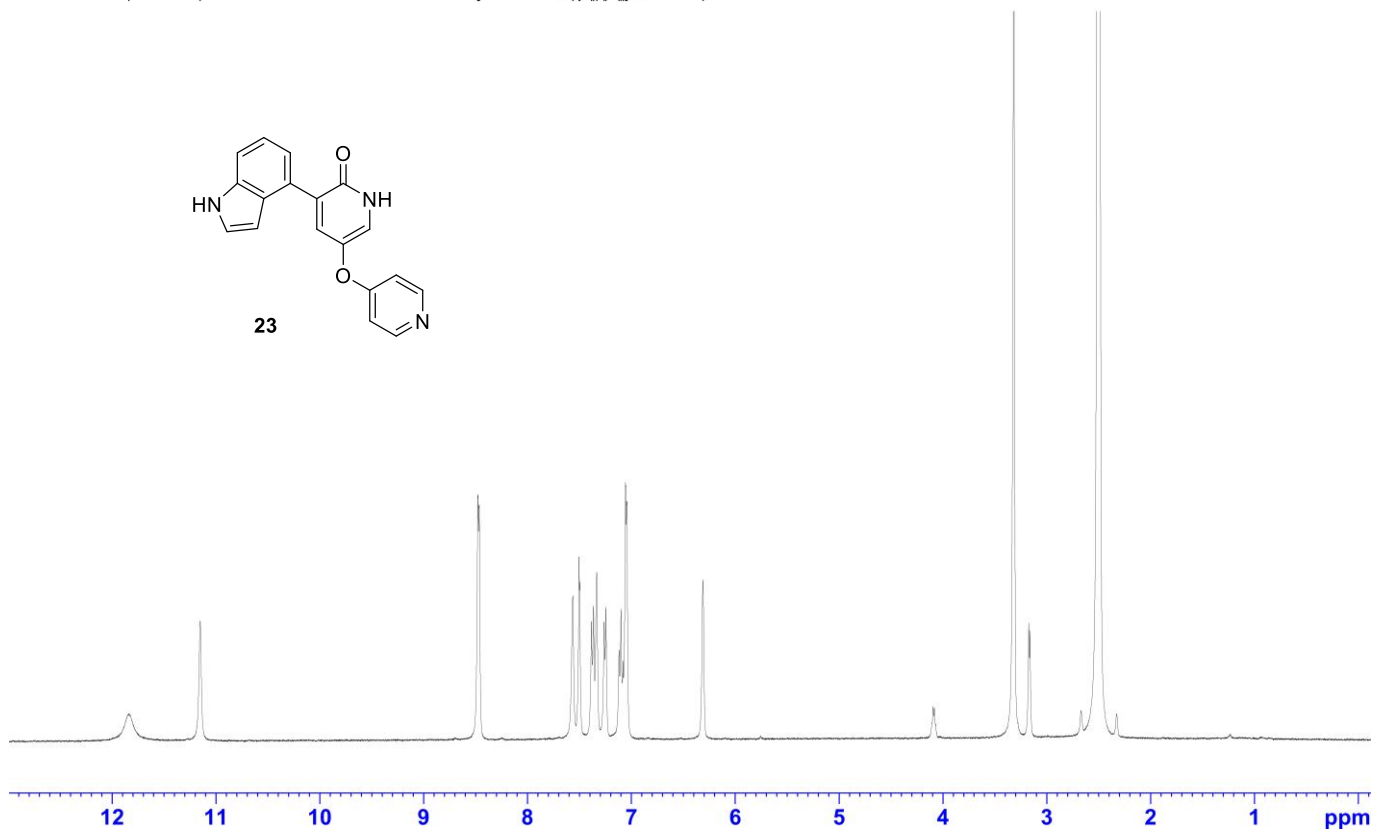

— 164.7

— 160.0

— 151.5

136.1

135.3

134.6

131.2

127.7

126.1

125.5

120.4

120.0

111.3

111.2

— 100.4

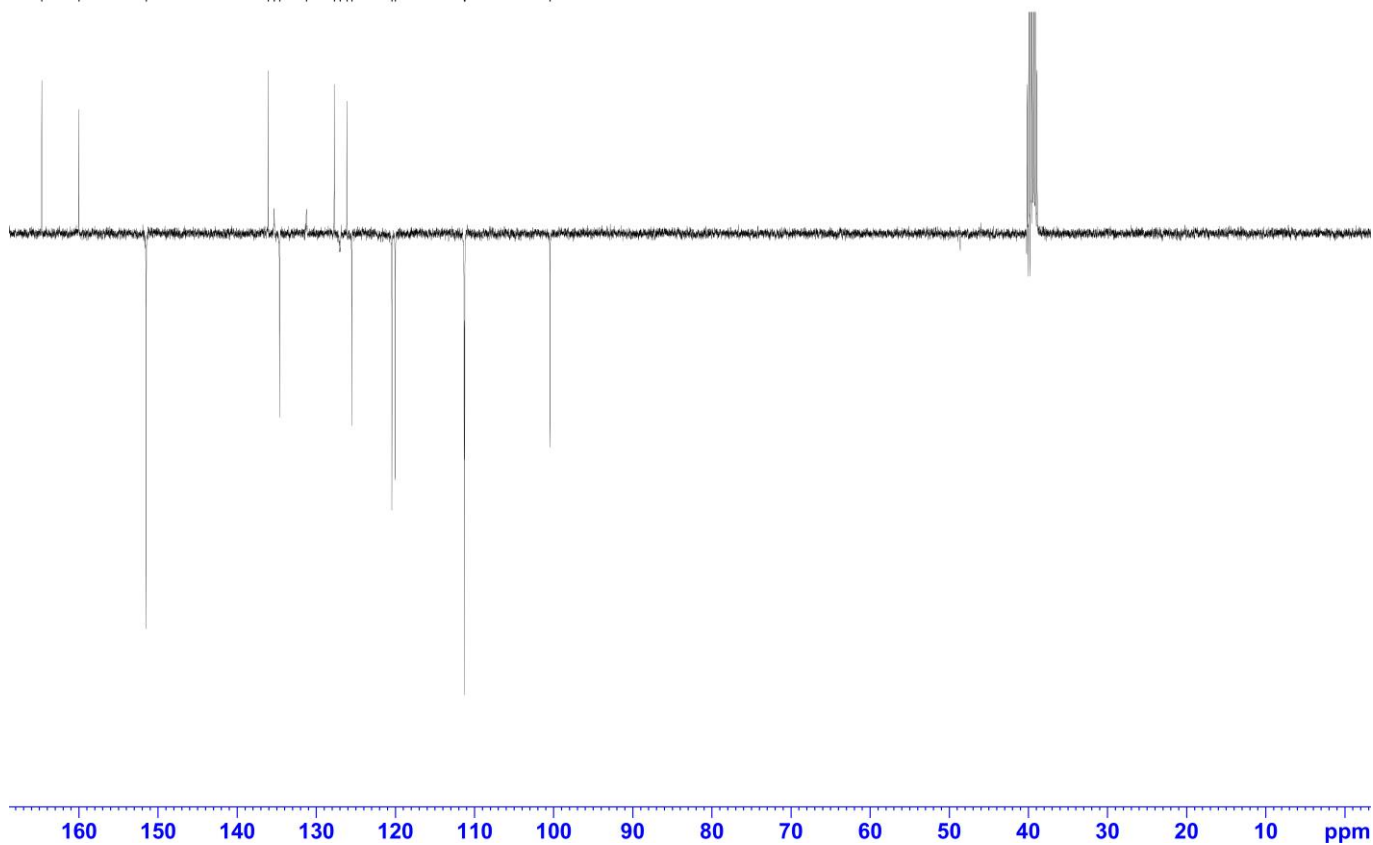

— 11.48  
— 11.14

7.40  
7.40  
7.37  
7.35  
7.32  
7.24  
7.22  
7.17  
7.10  
7.09  
7.07  
6.81  
6.79  
6.57  
6.55  
6.26  
5.75  
— 4.89

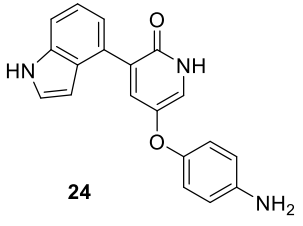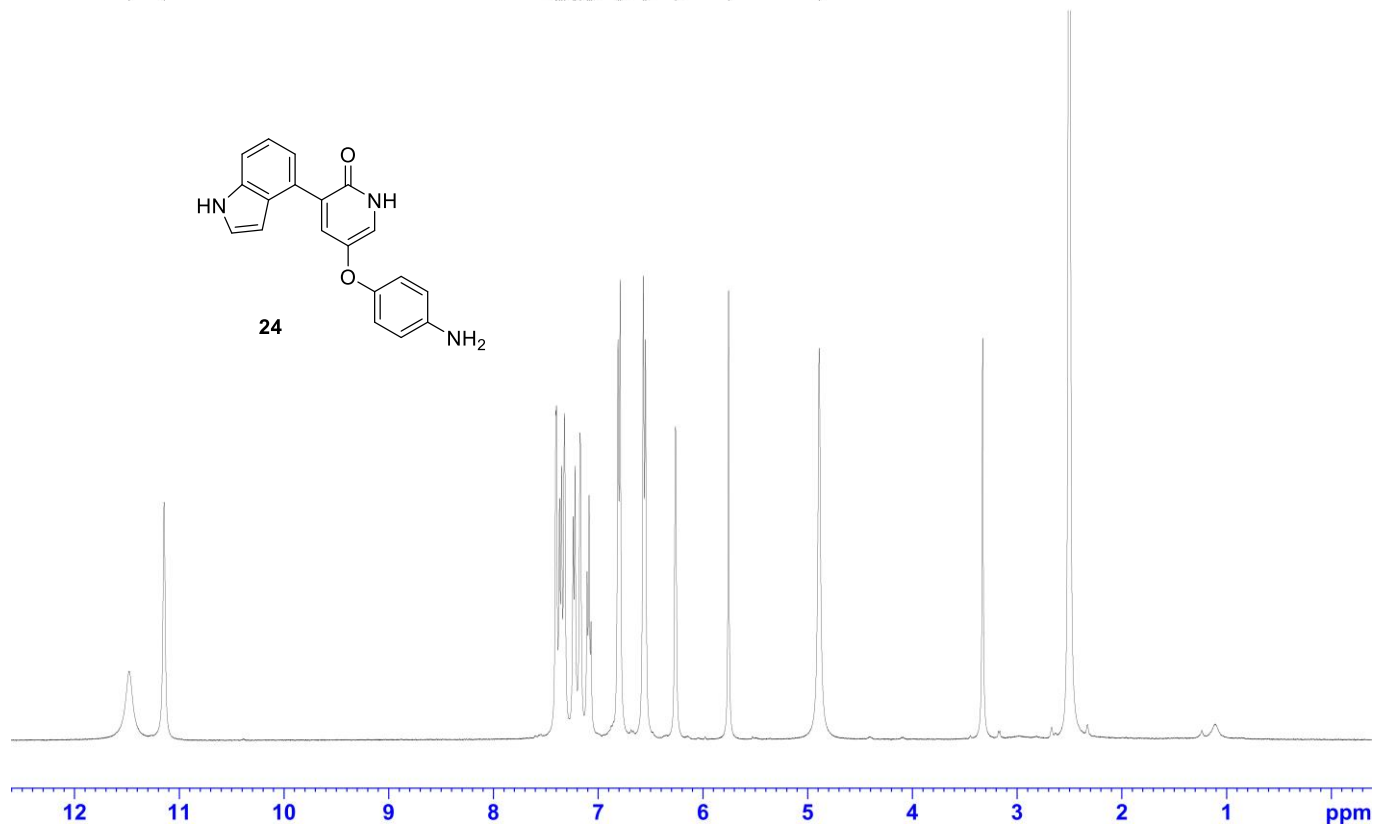

159.3  
147.7  
144.8  
140.3  
136.1  
133.6  
130.3  
128.0  
126.1  
125.4  
123.3  
120.4  
119.9  
118.8  
114.8  
111.0  
100.3

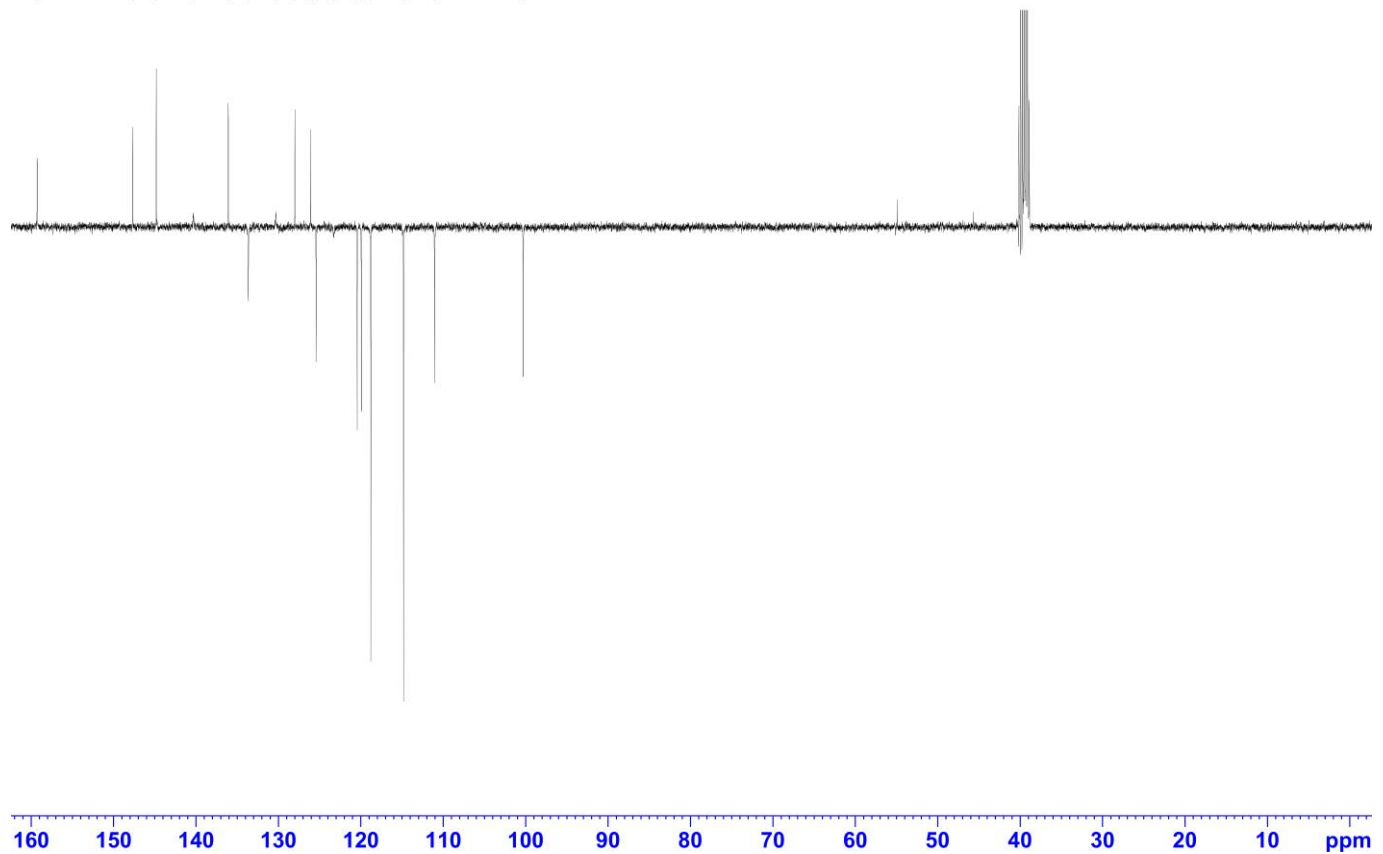

— 11.13

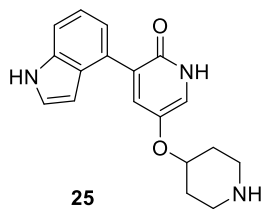

7.43  
7.43  
7.37  
7.35  
7.34  
7.21  
7.19  
7.15  
7.11  
7.09  
7.07  
6.31

4.10  
4.09  
4.08  
4.07  
4.06

2.95  
2.92

1.90  
1.87  
1.46  
1.44  
1.41  
1.39

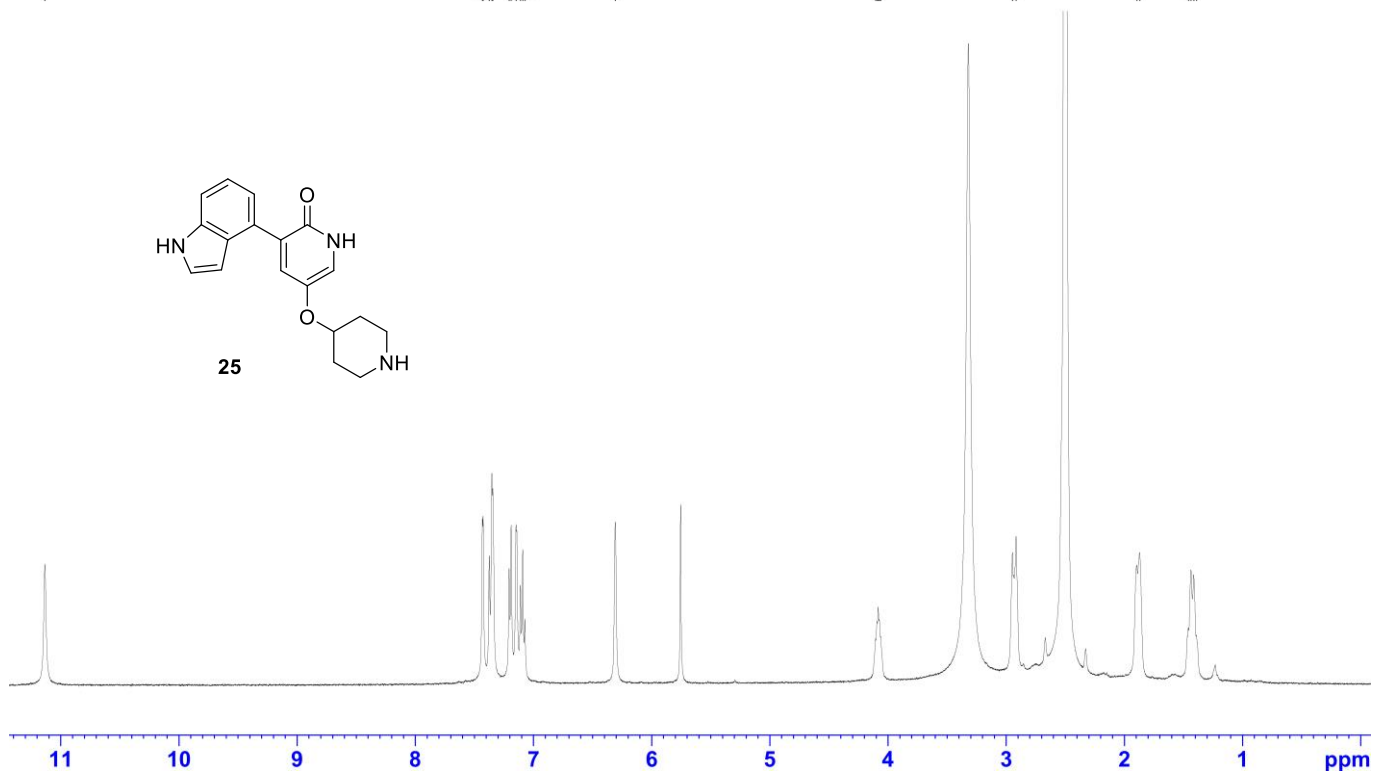

— 159.0

139.6  
136.1  
134.3  
130.2  
128.4  
126.2  
125.3  
122.0  
120.4  
119.9

— 110.9

— 100.6

— 76.4

— 43.5

— 32.2

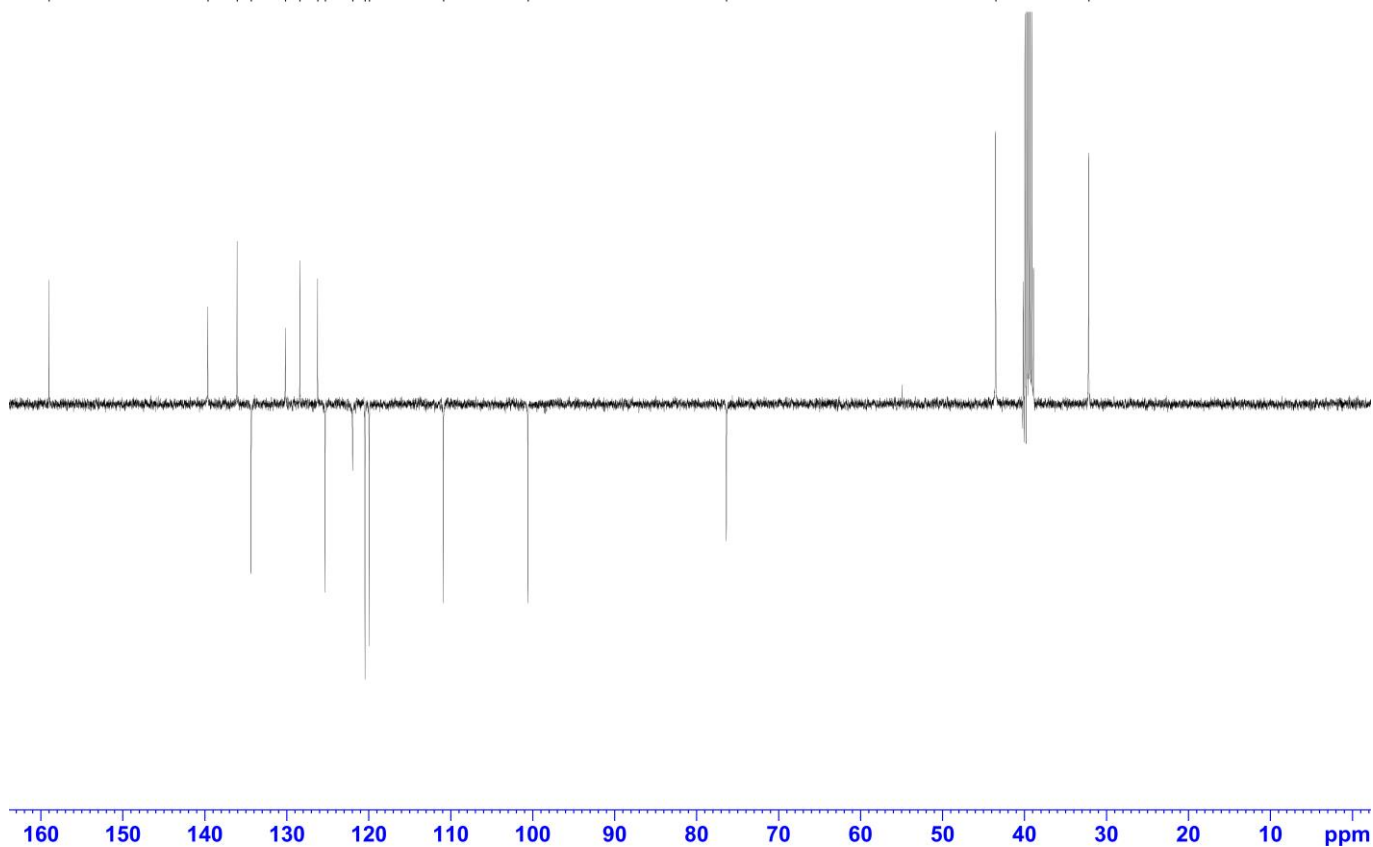

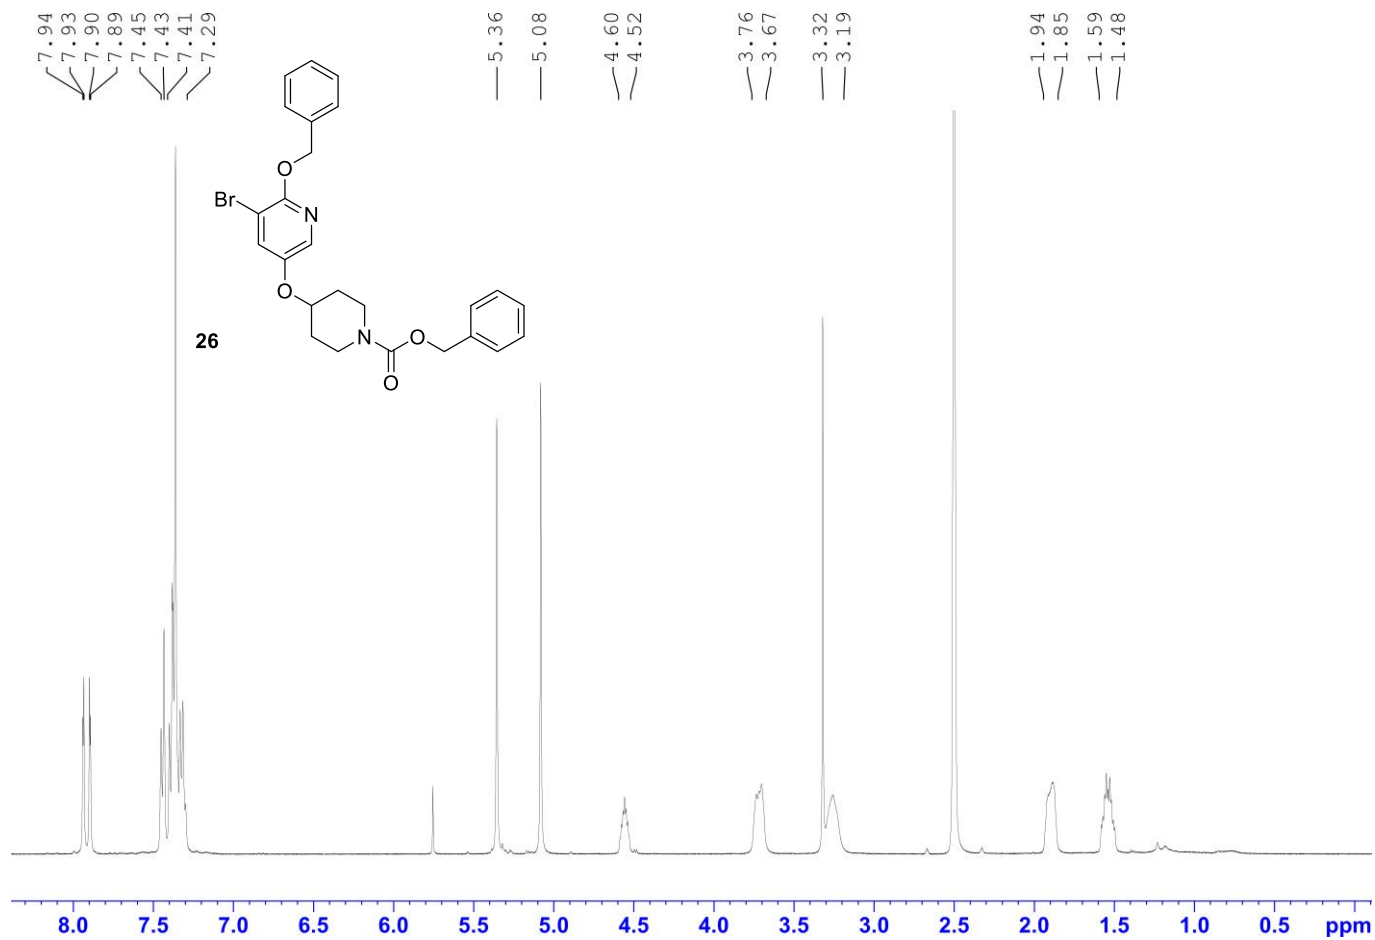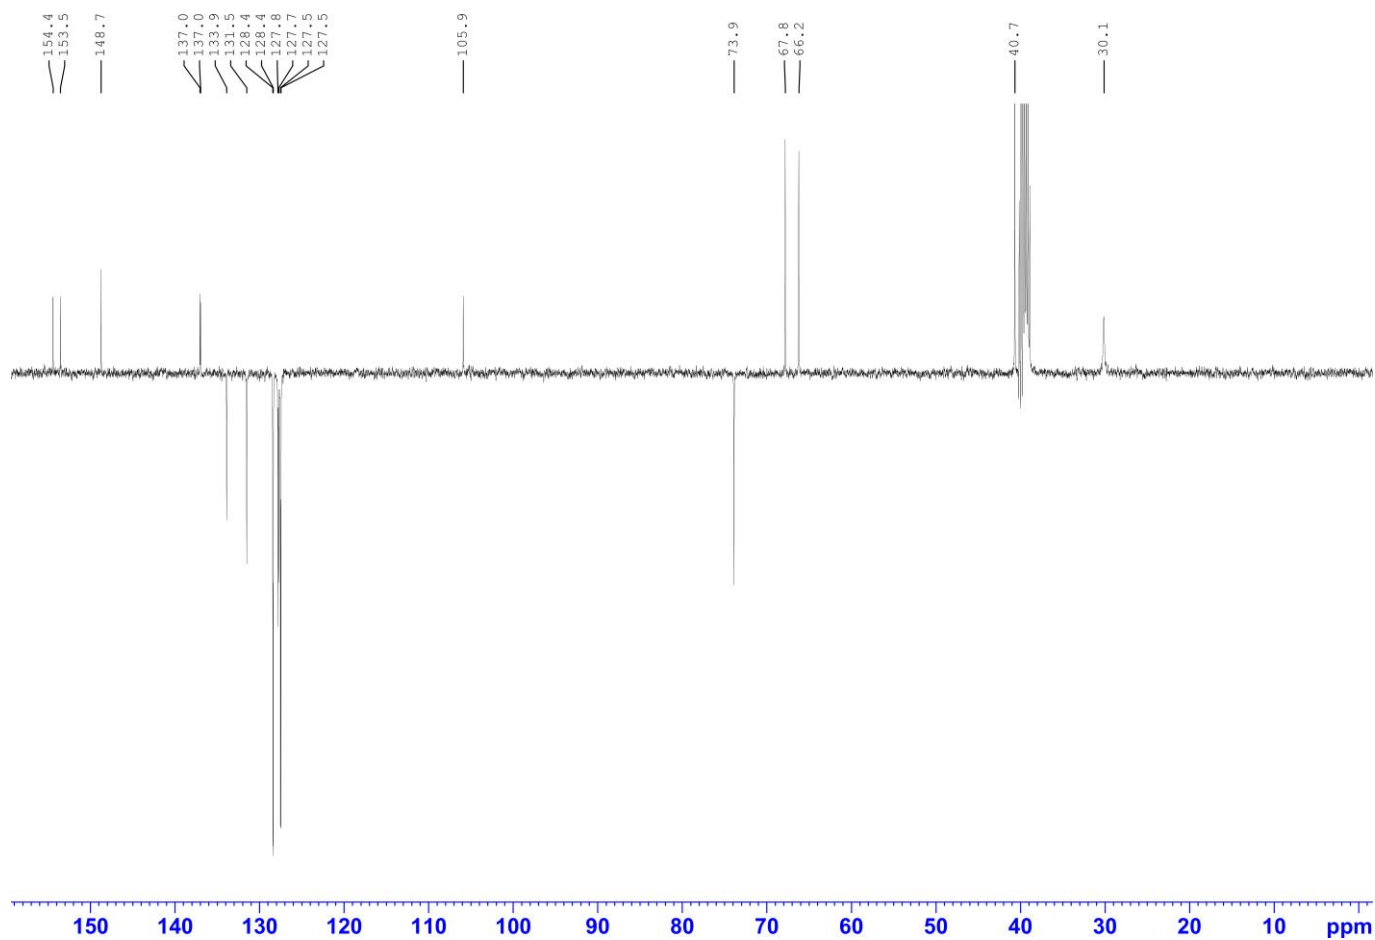

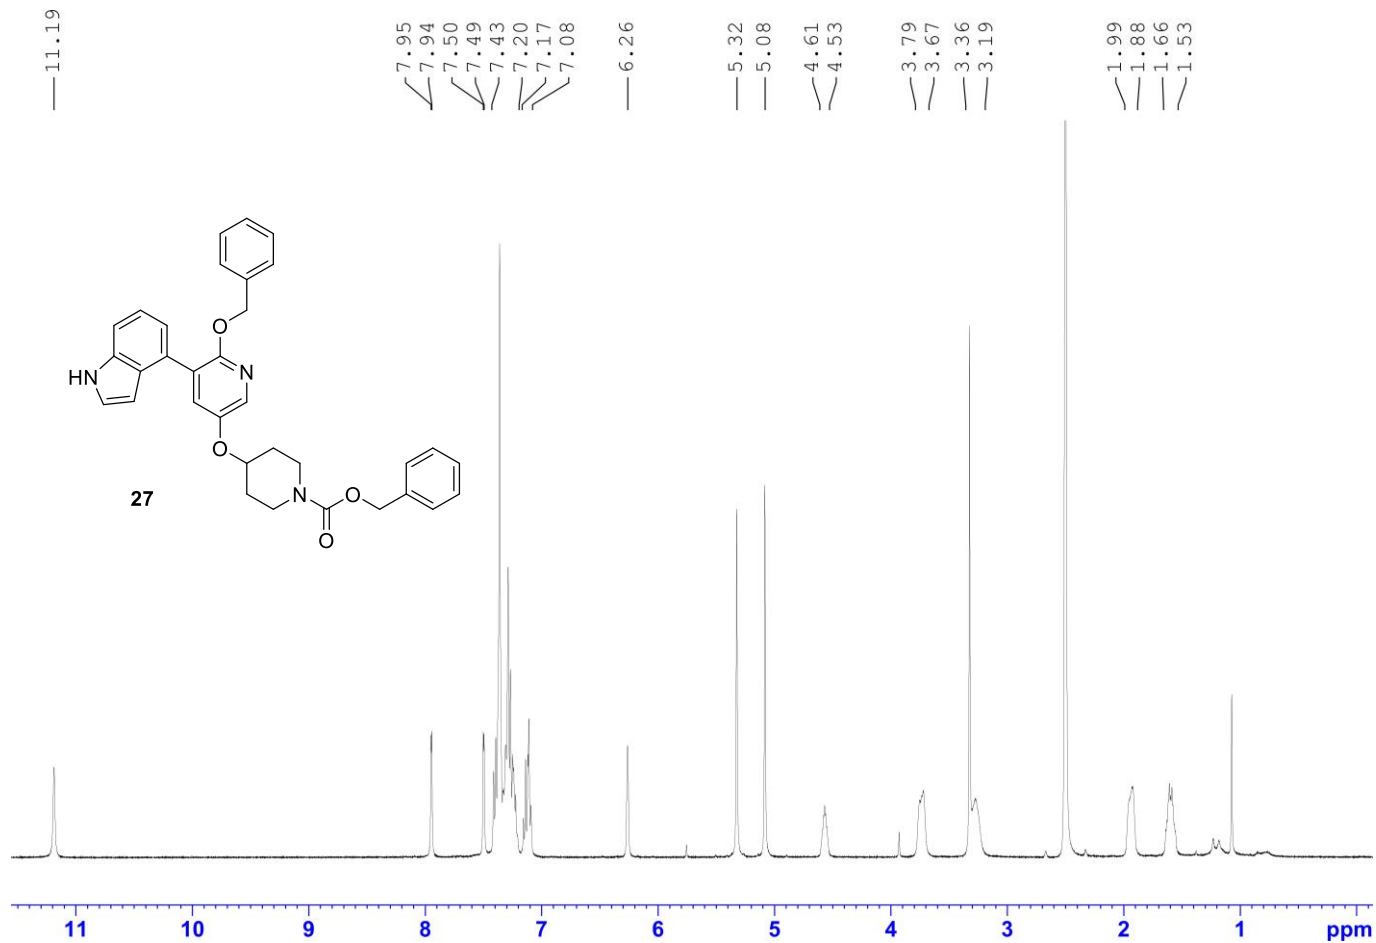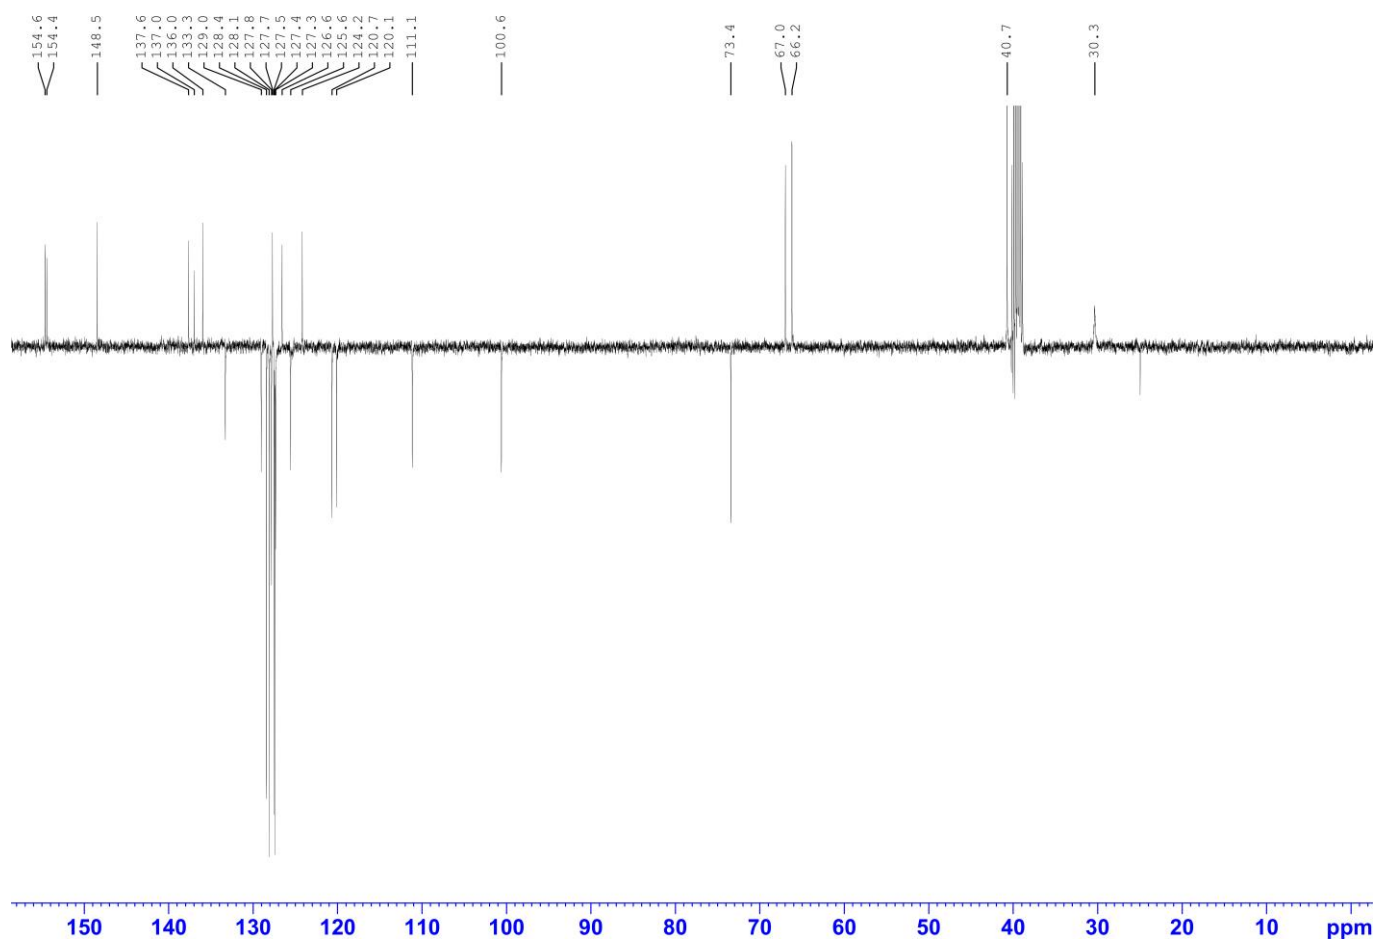



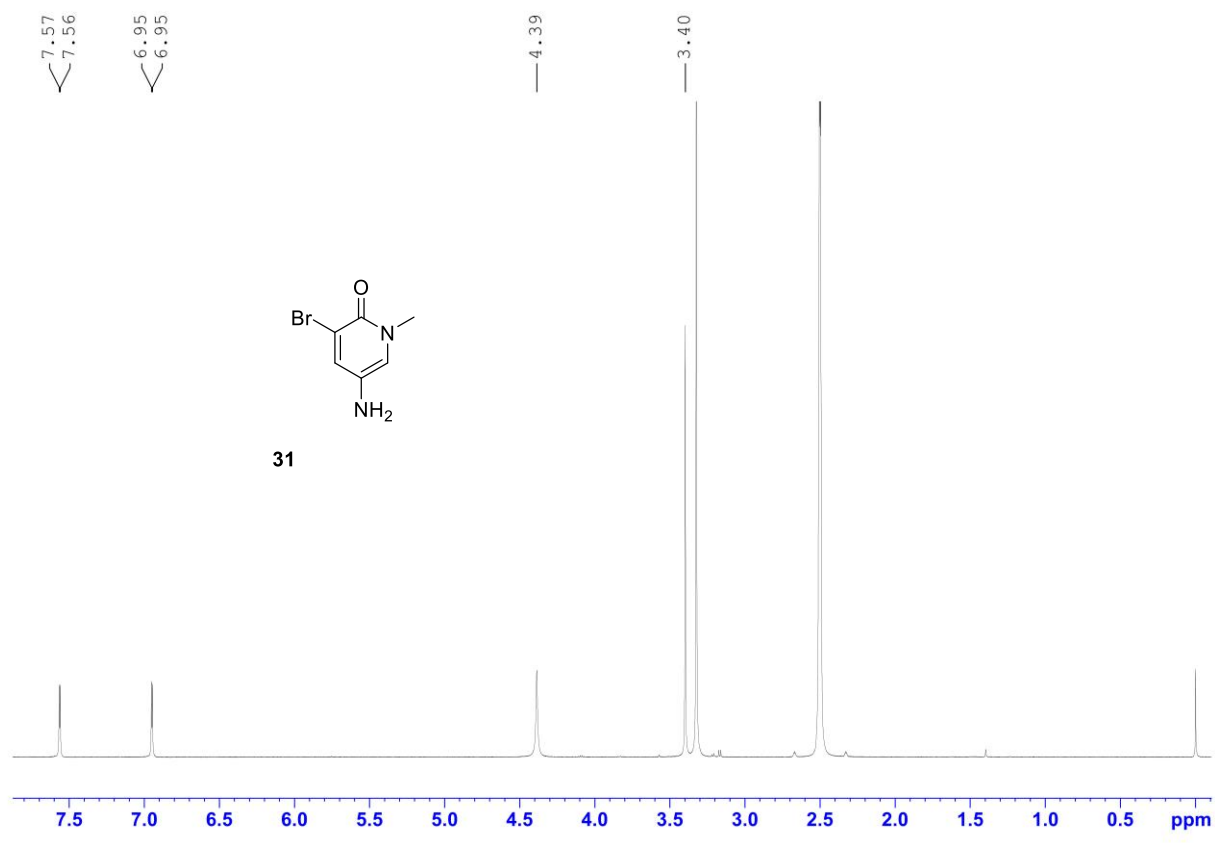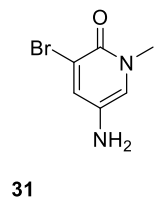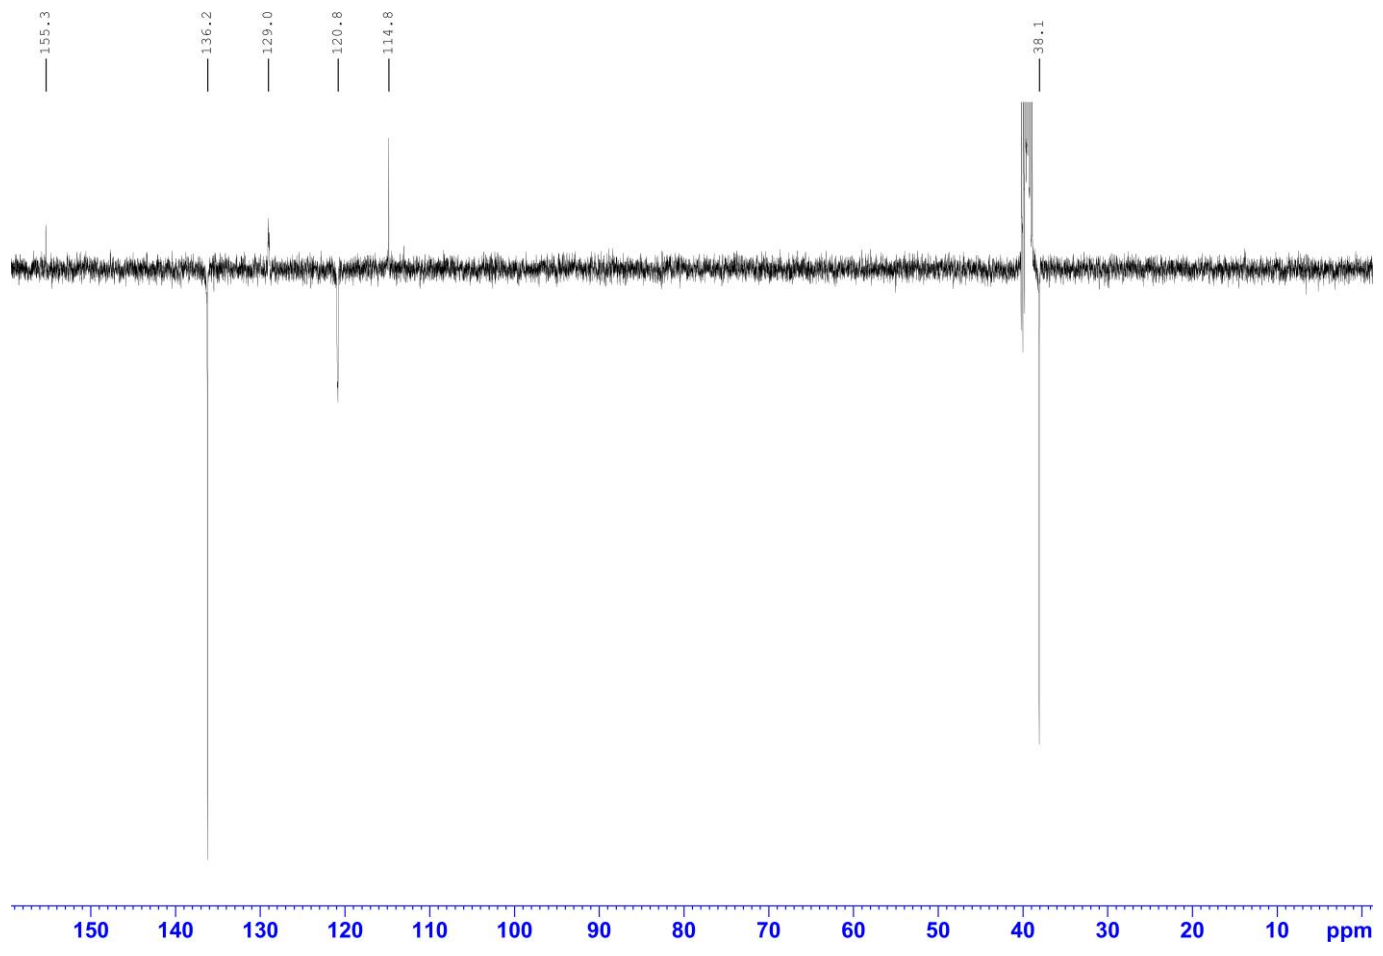

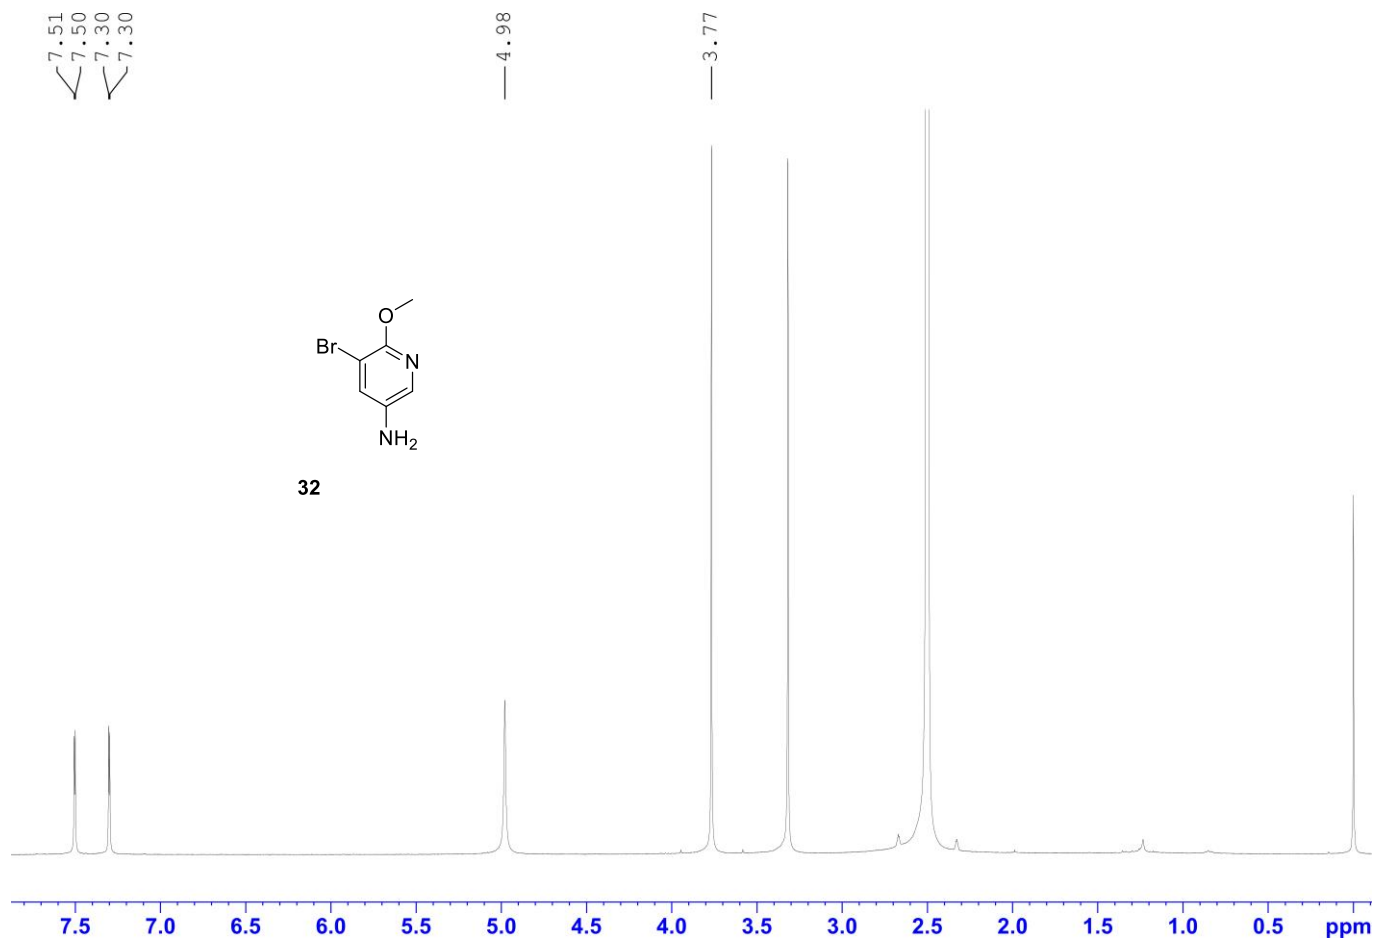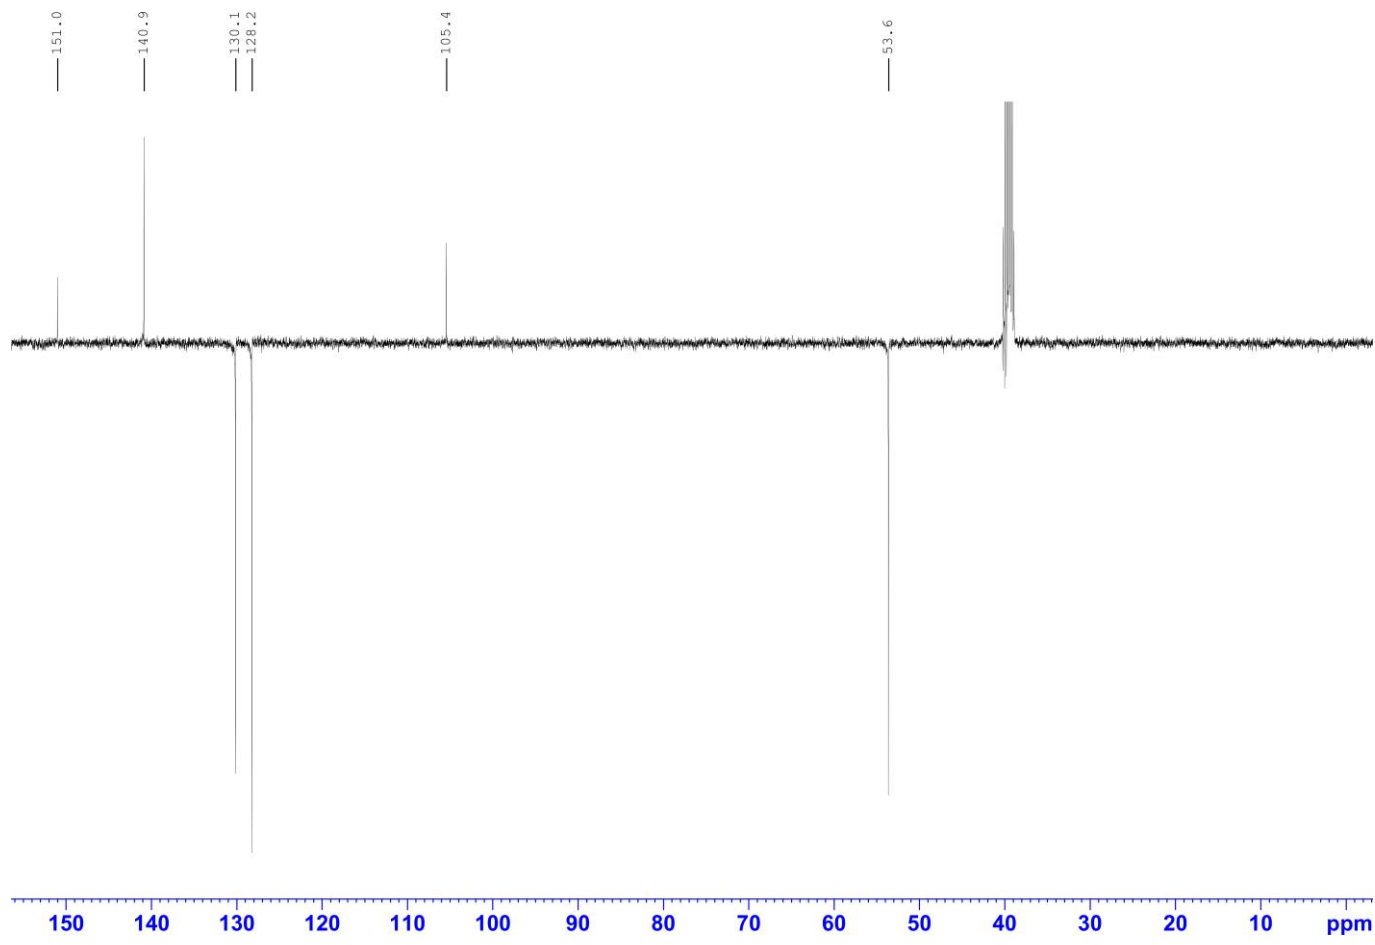

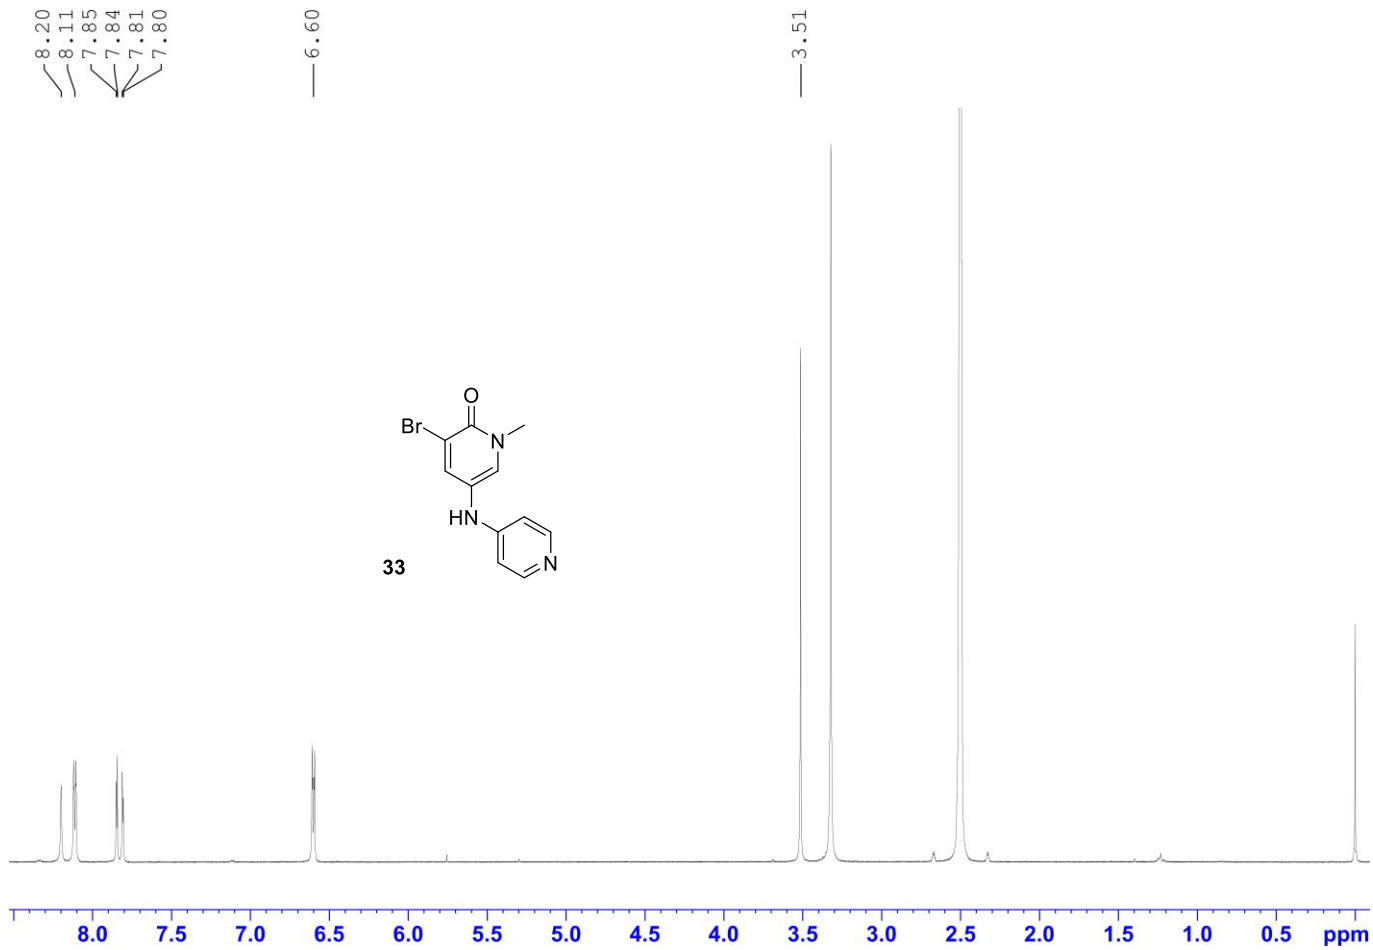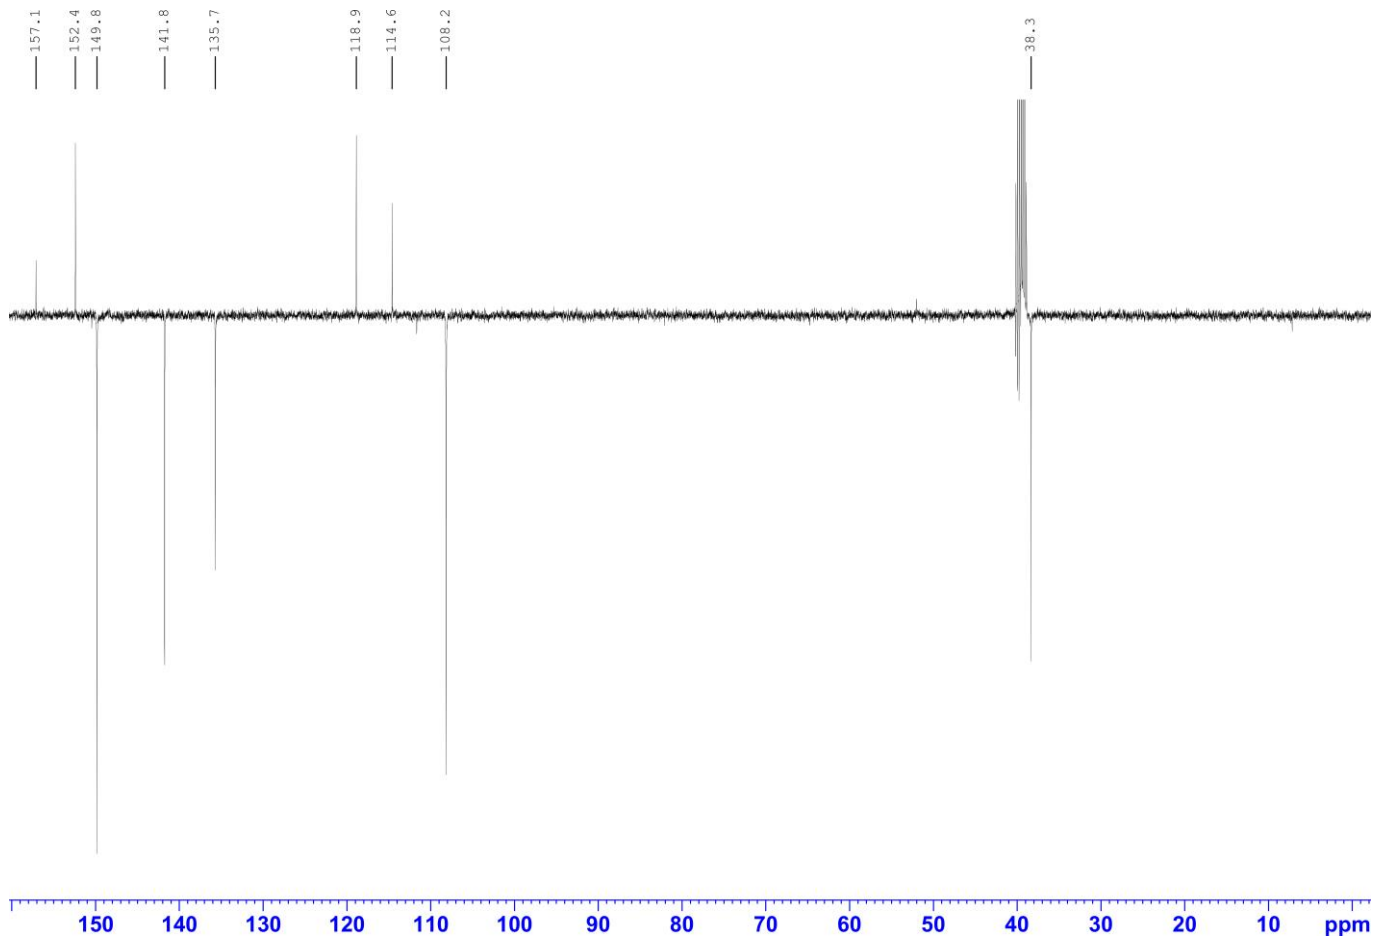

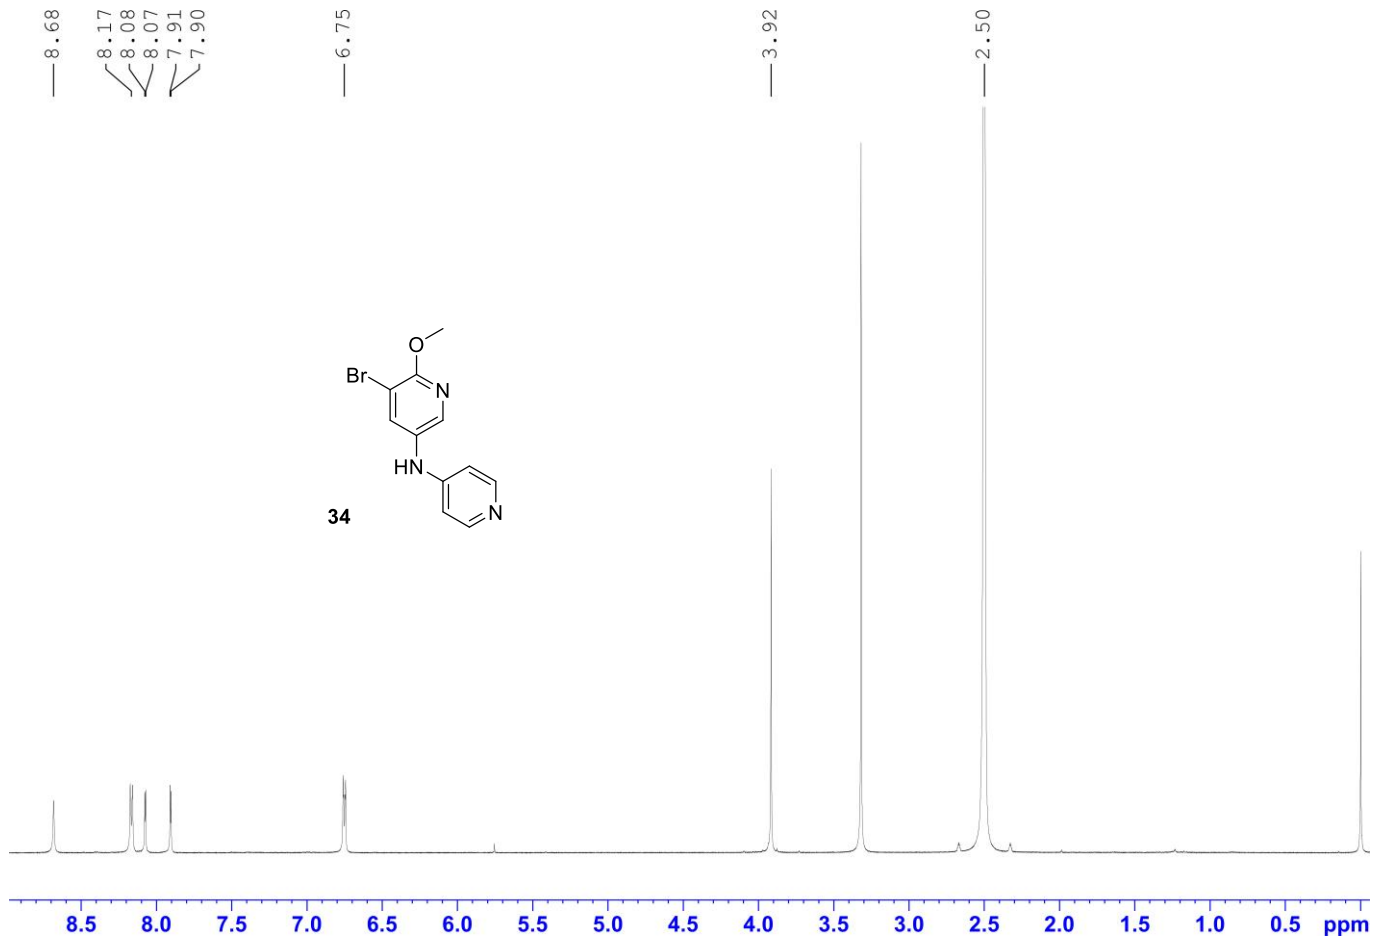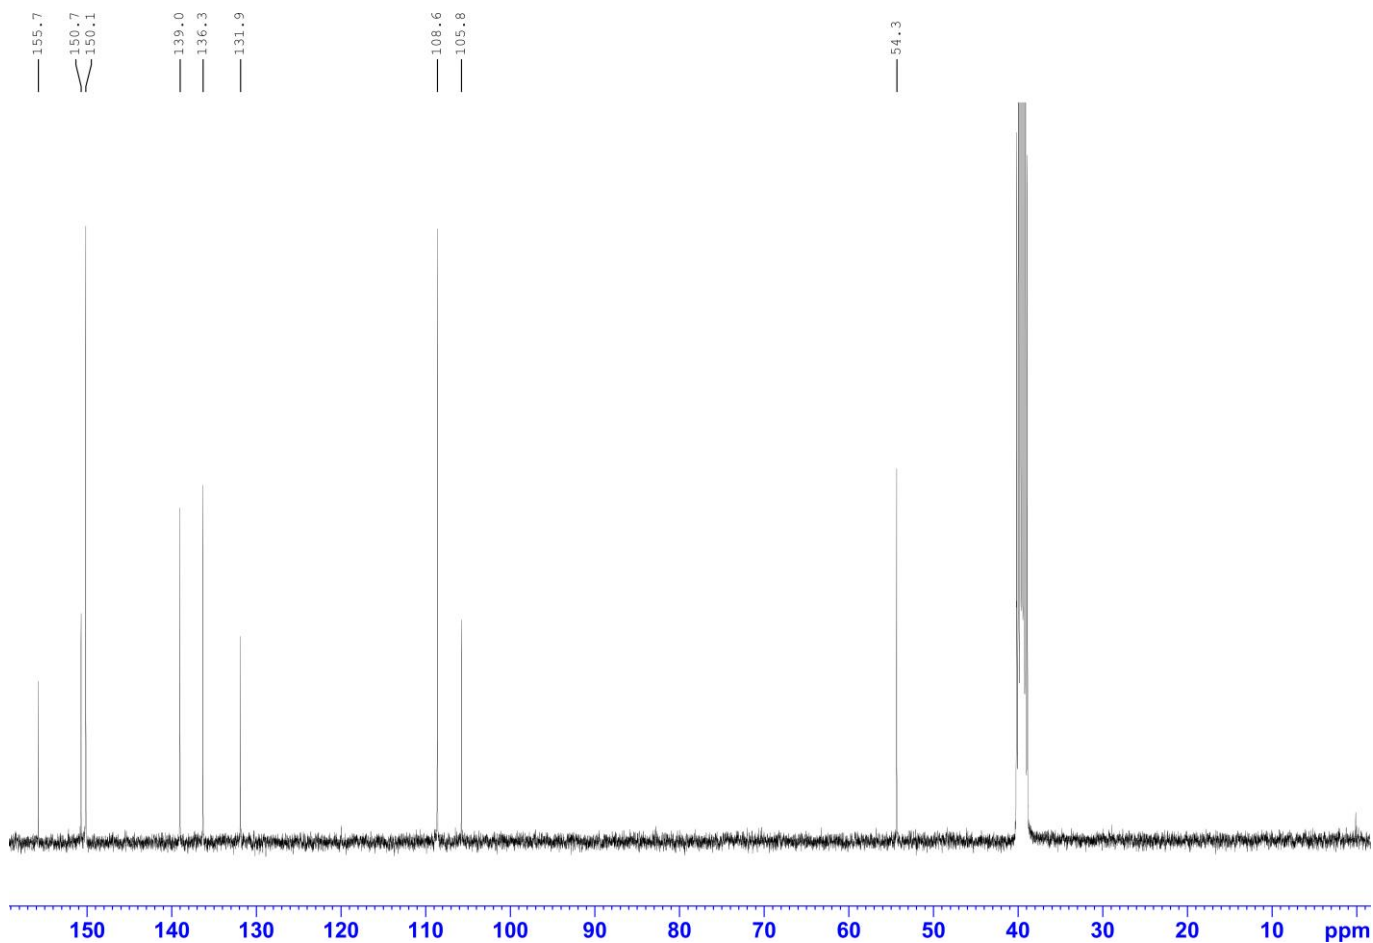

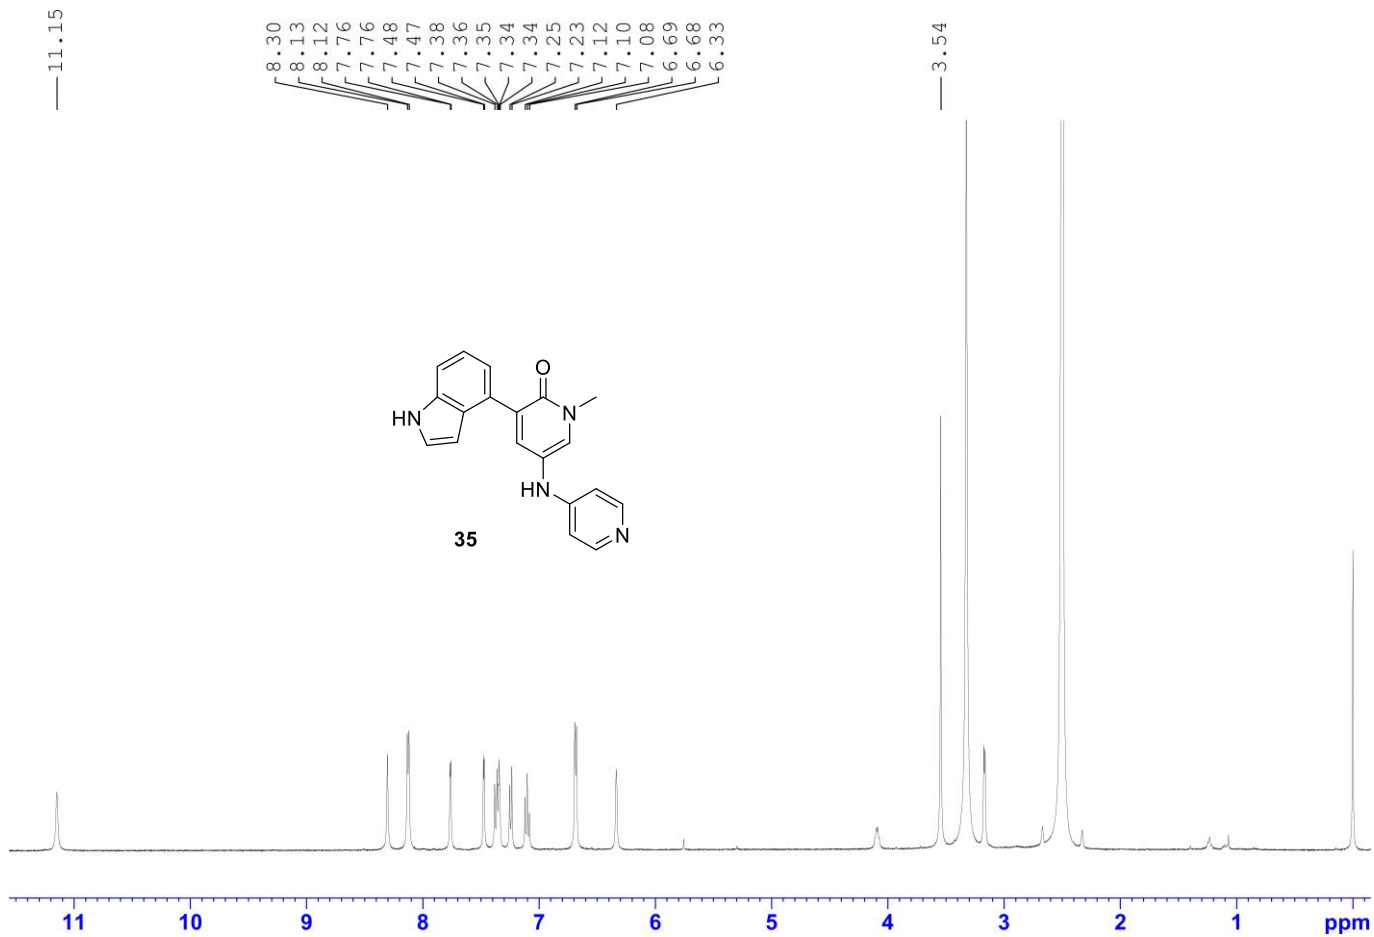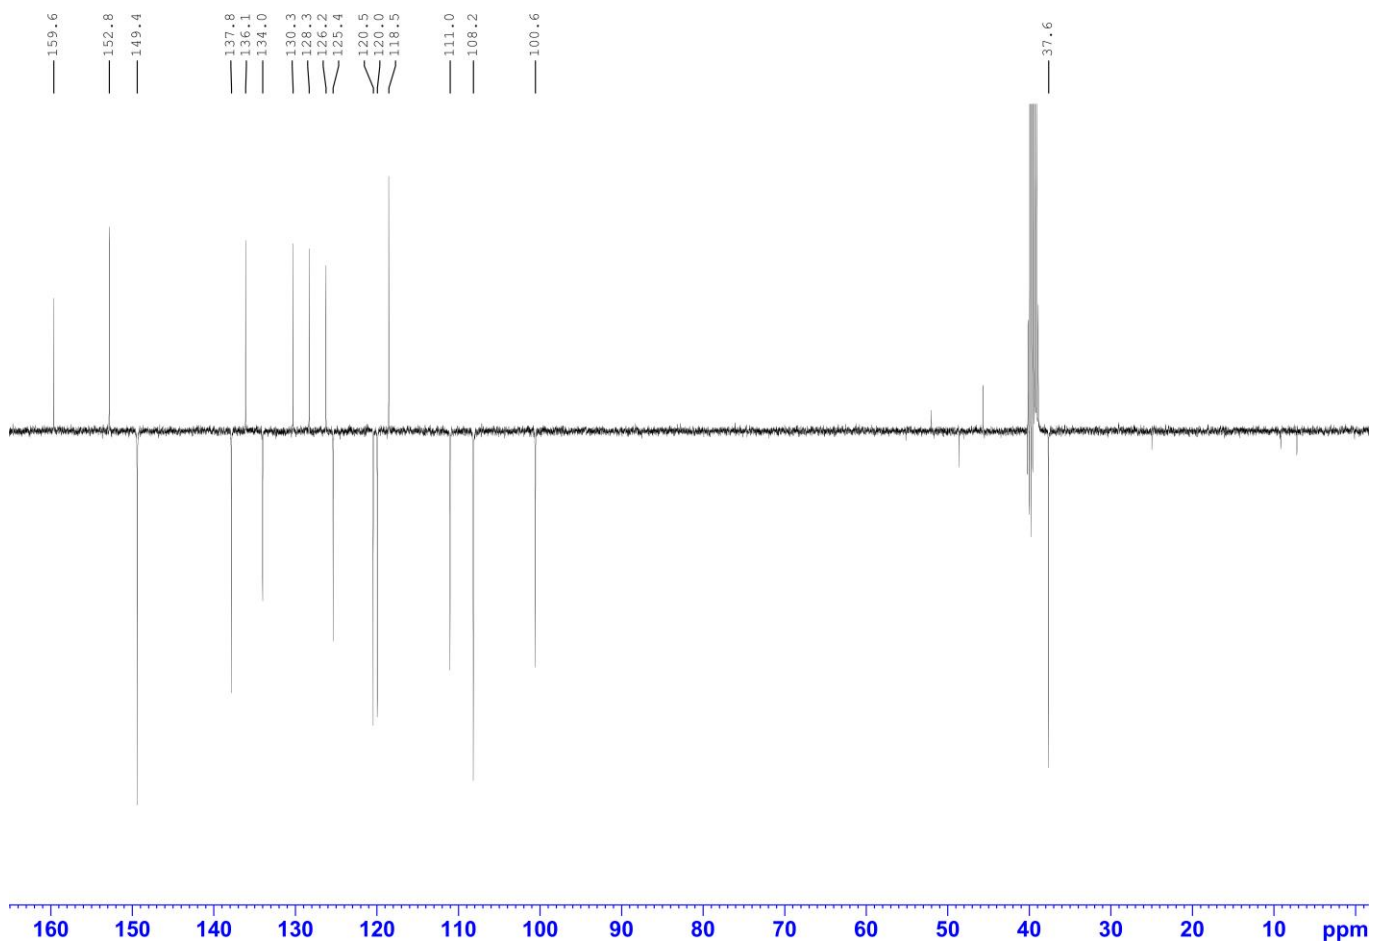

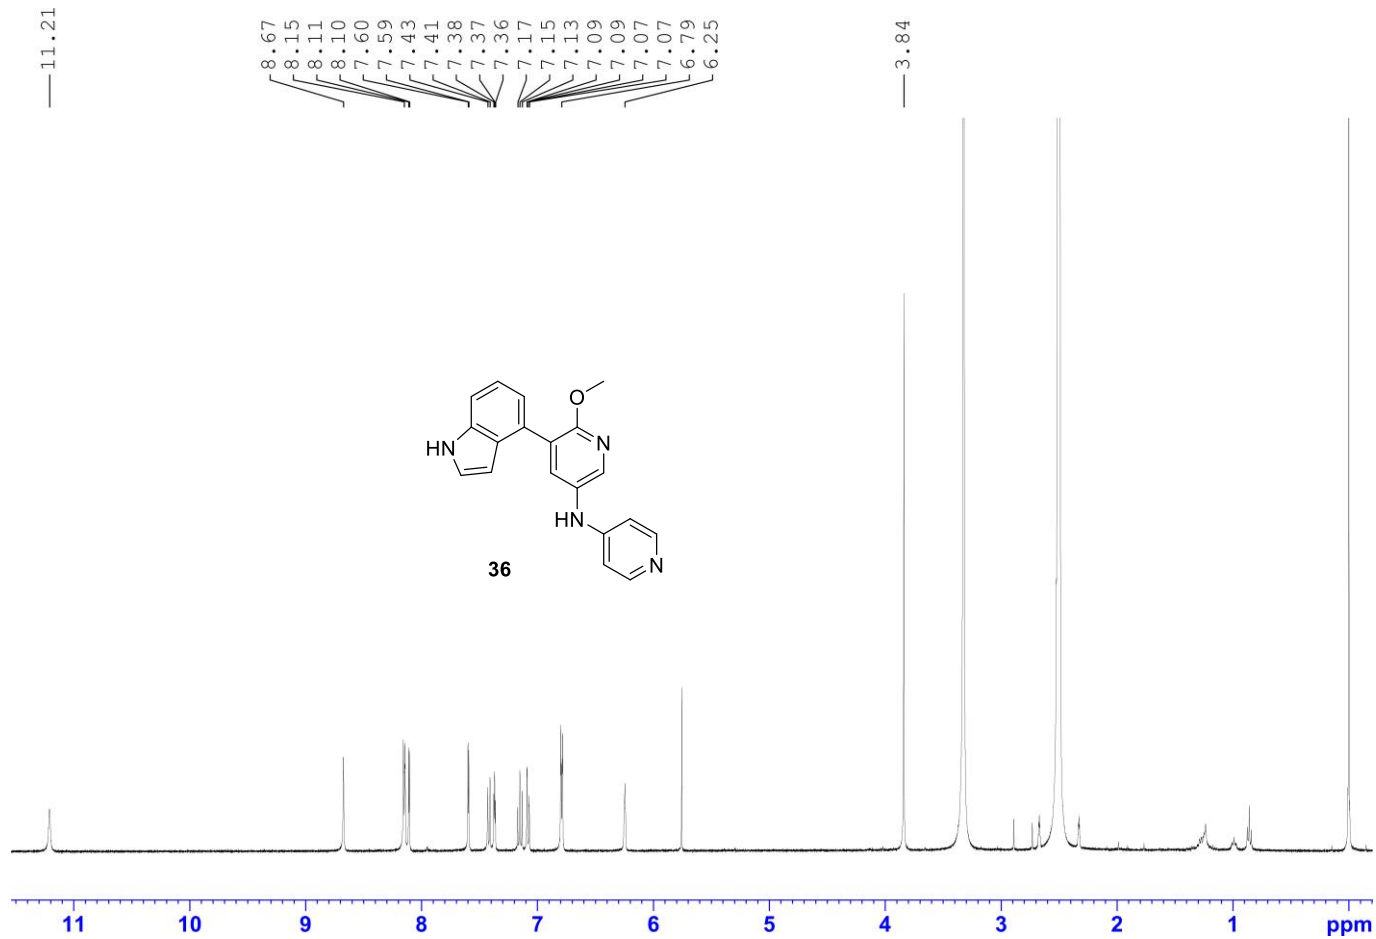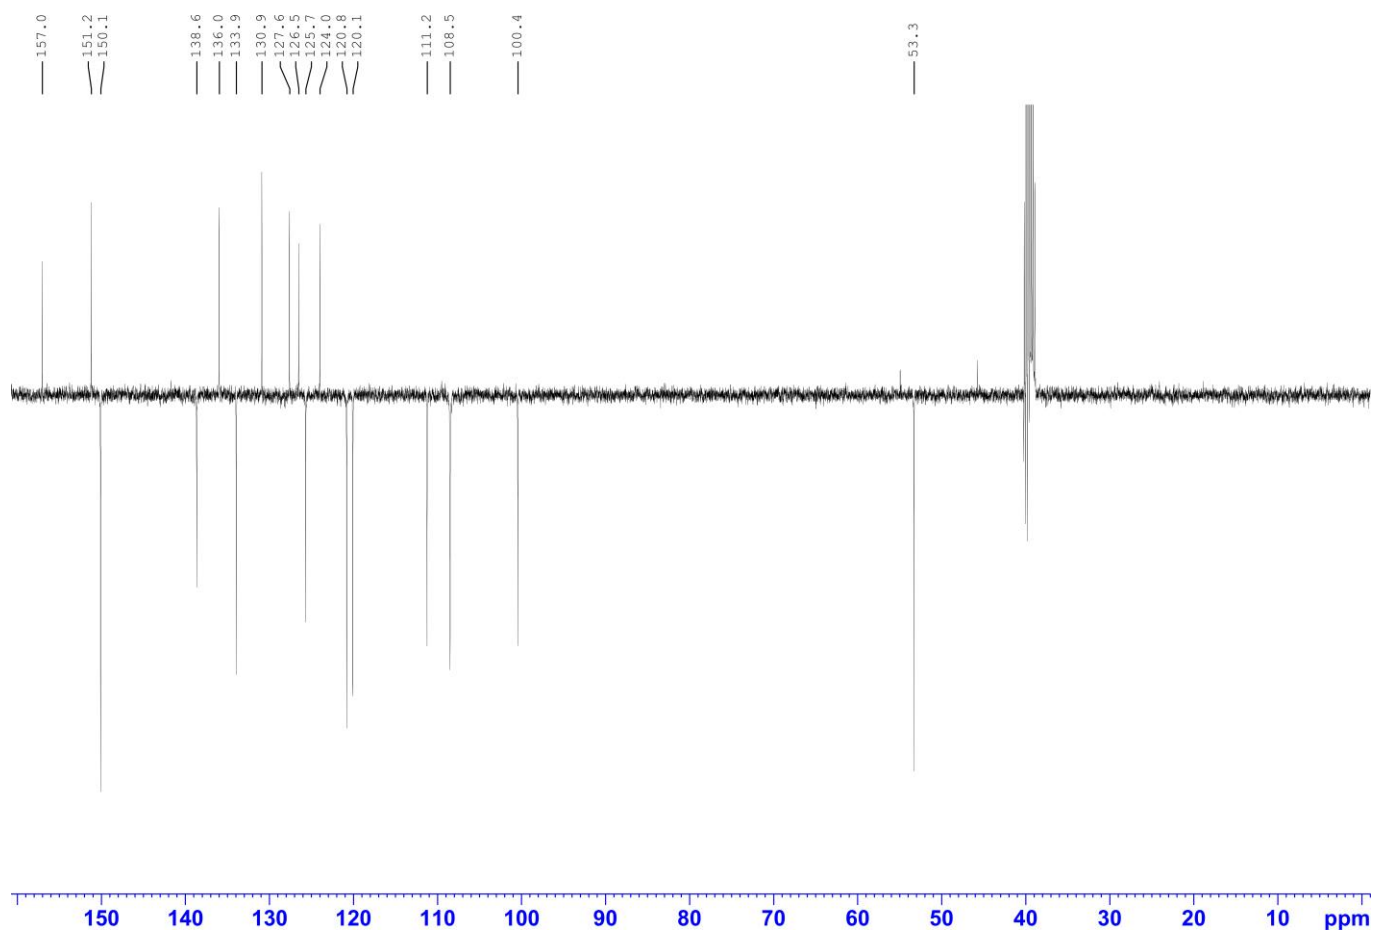

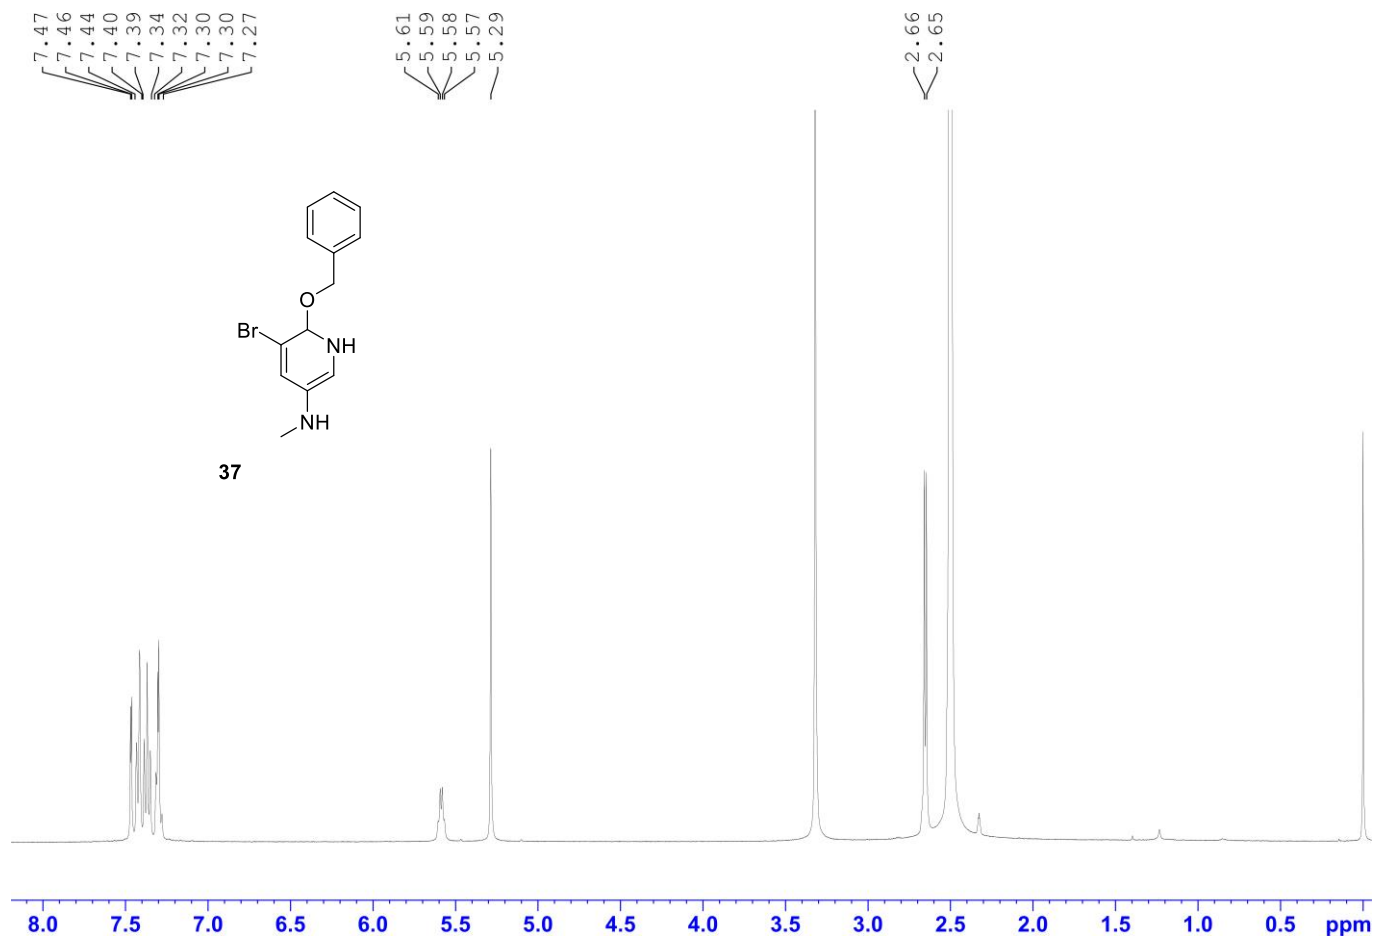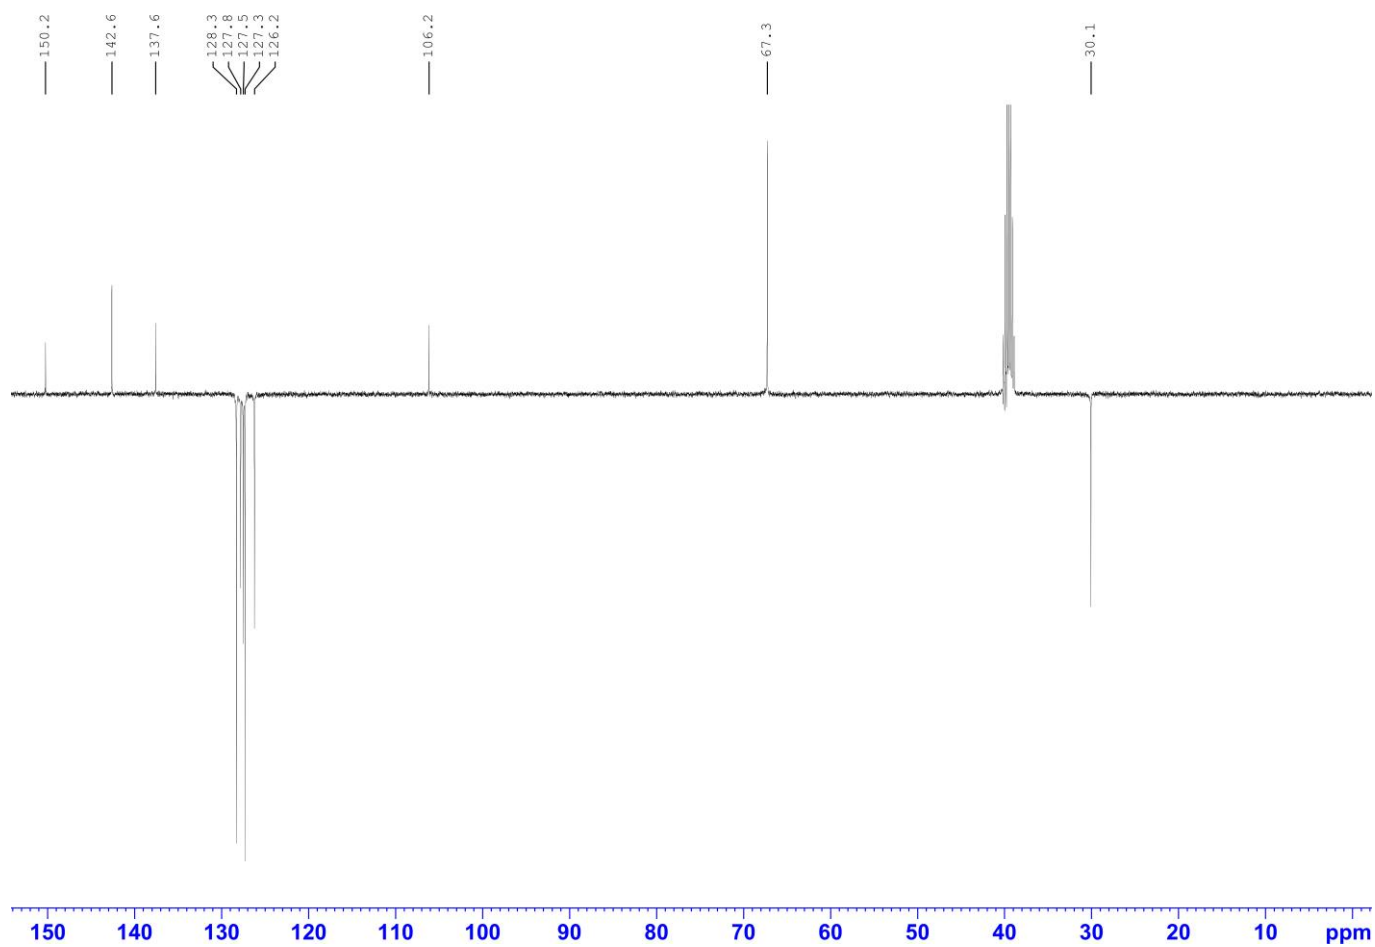

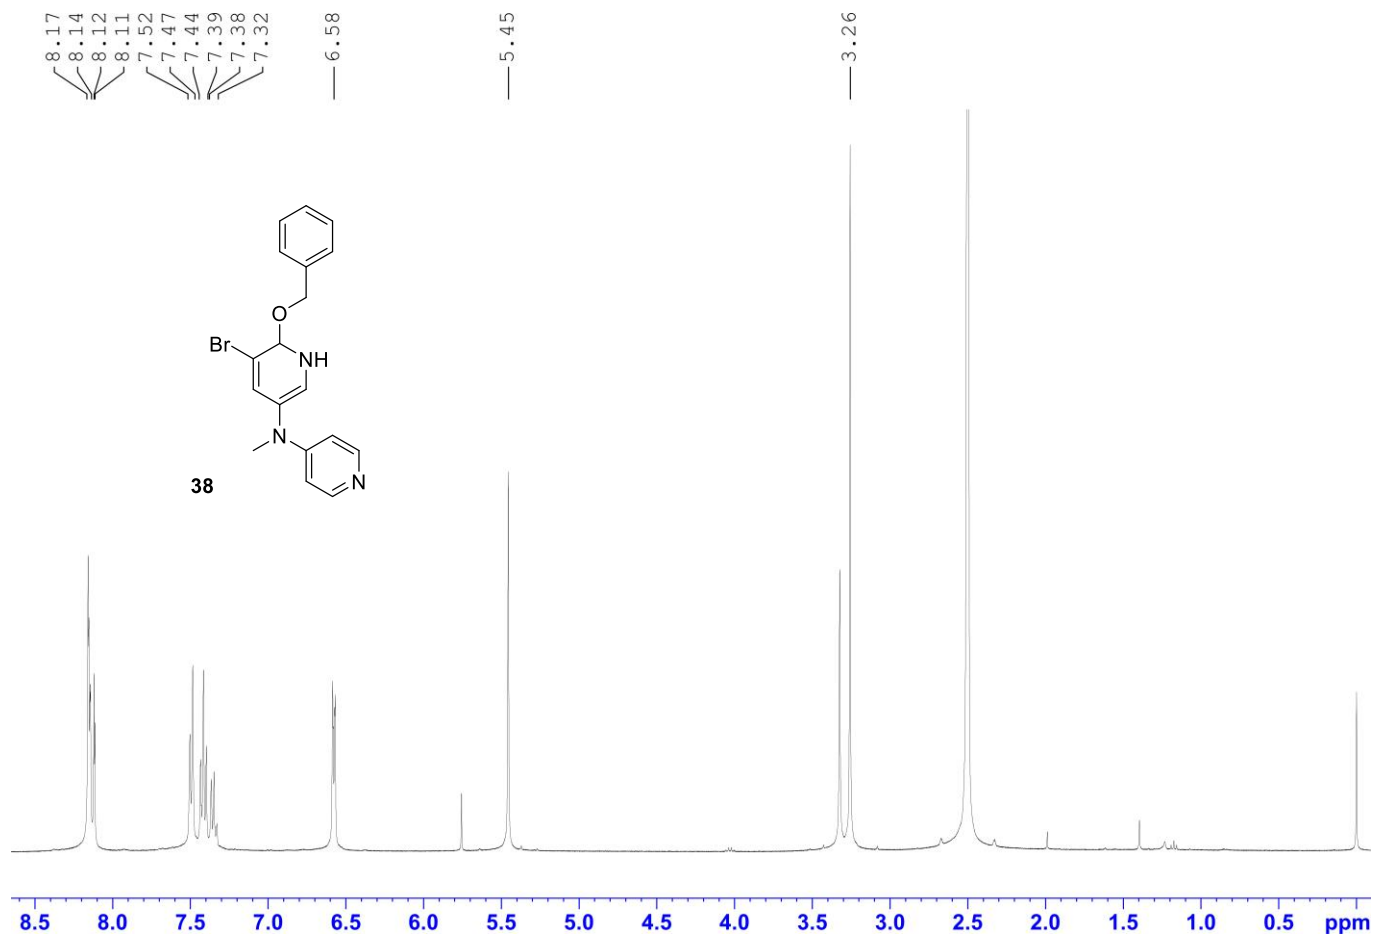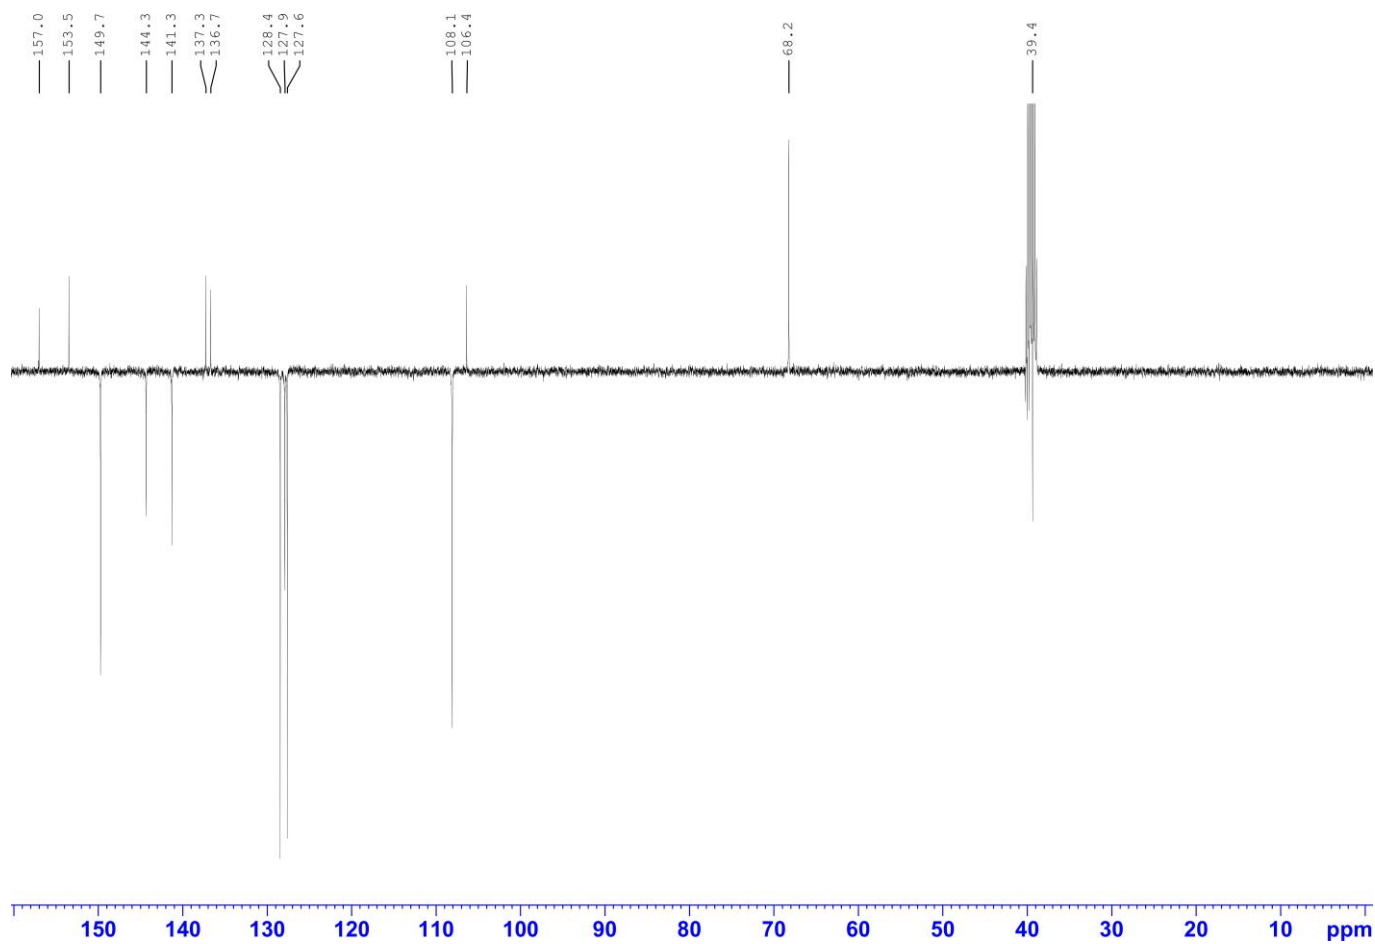



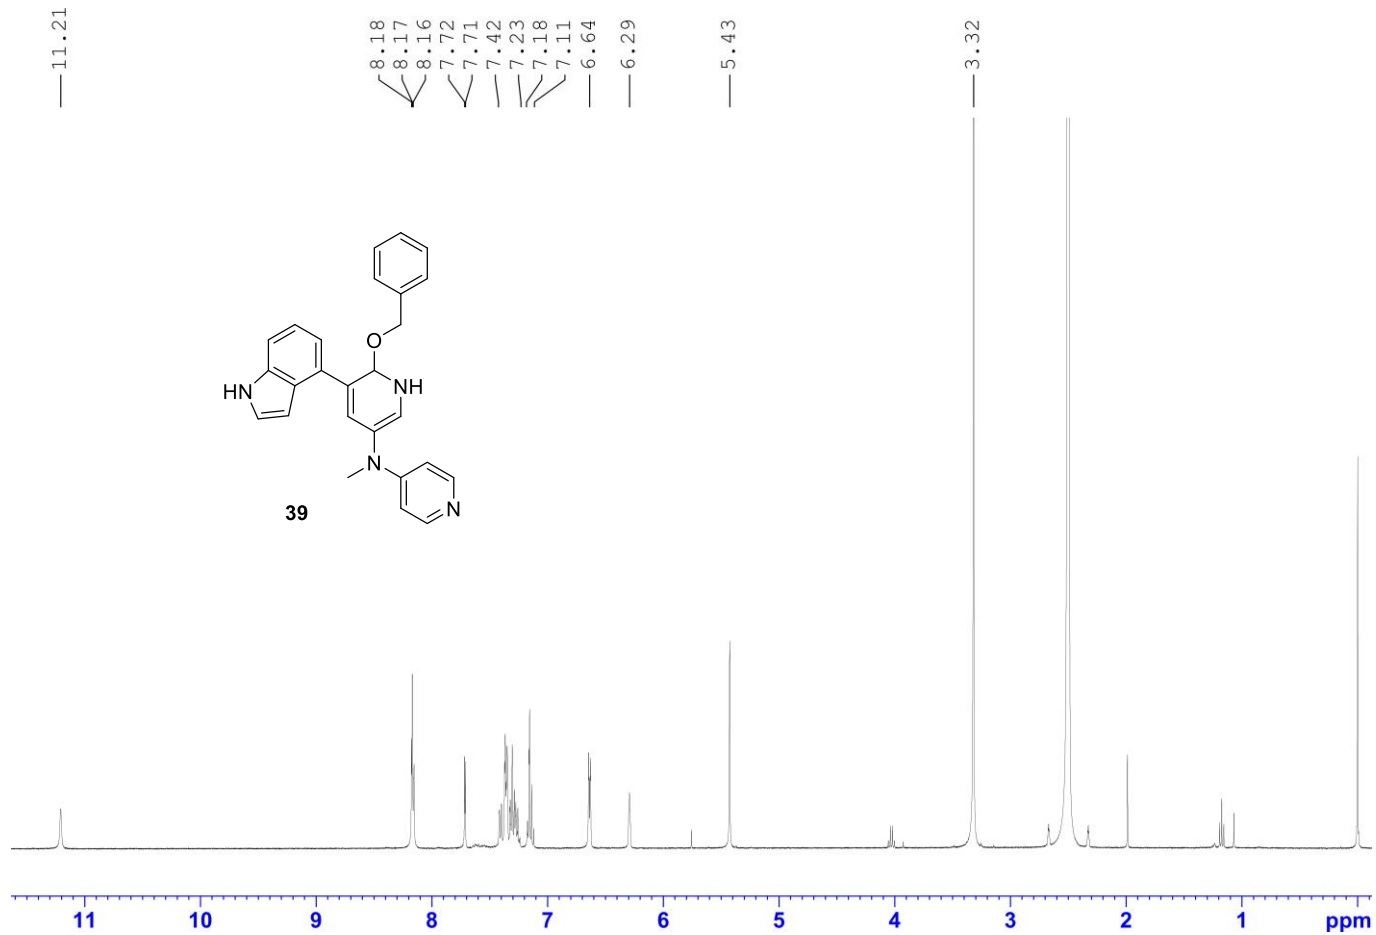

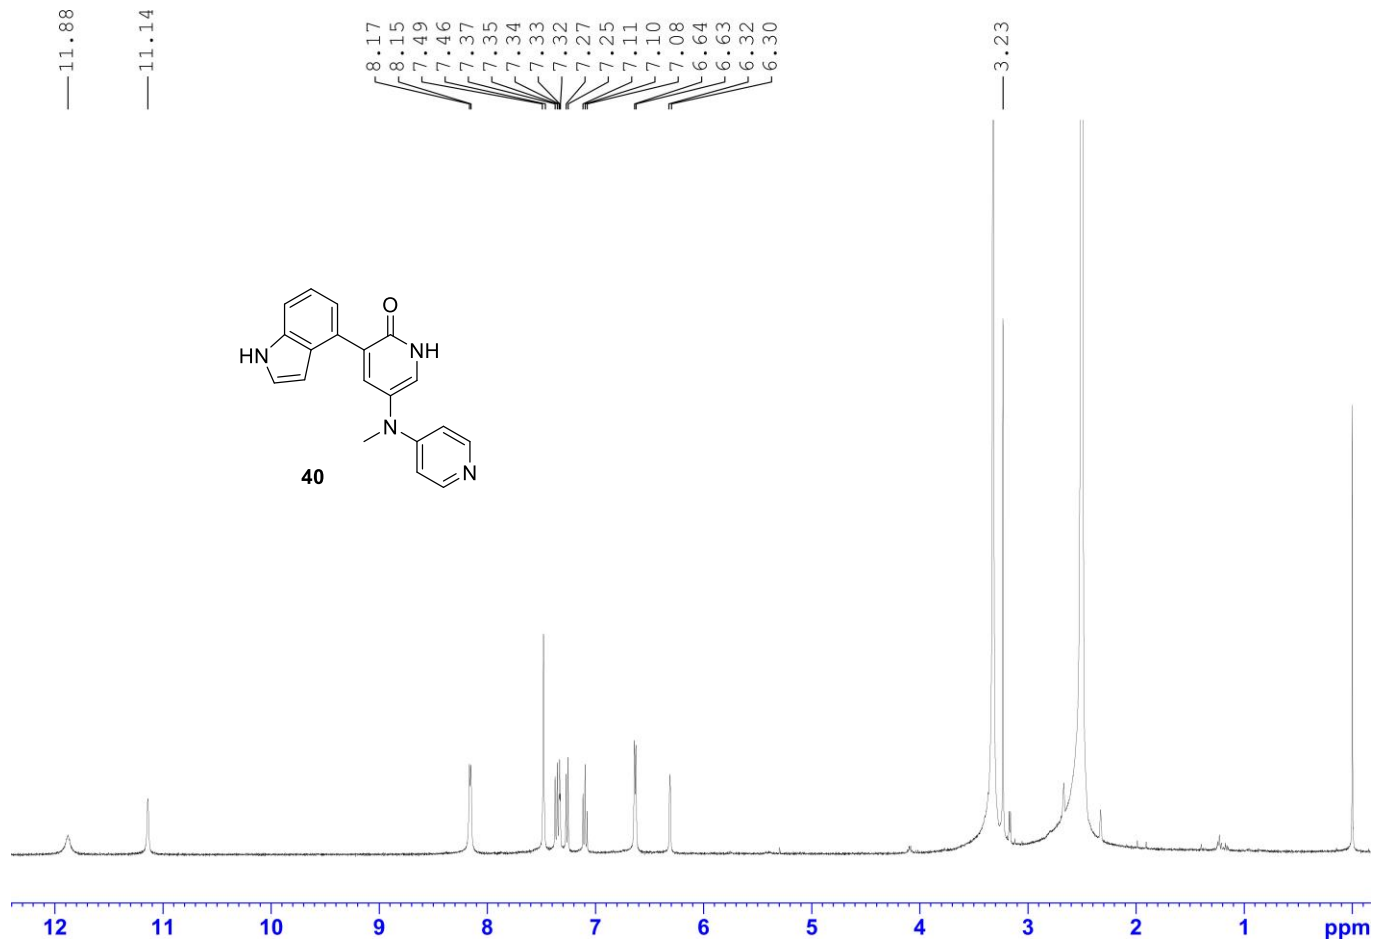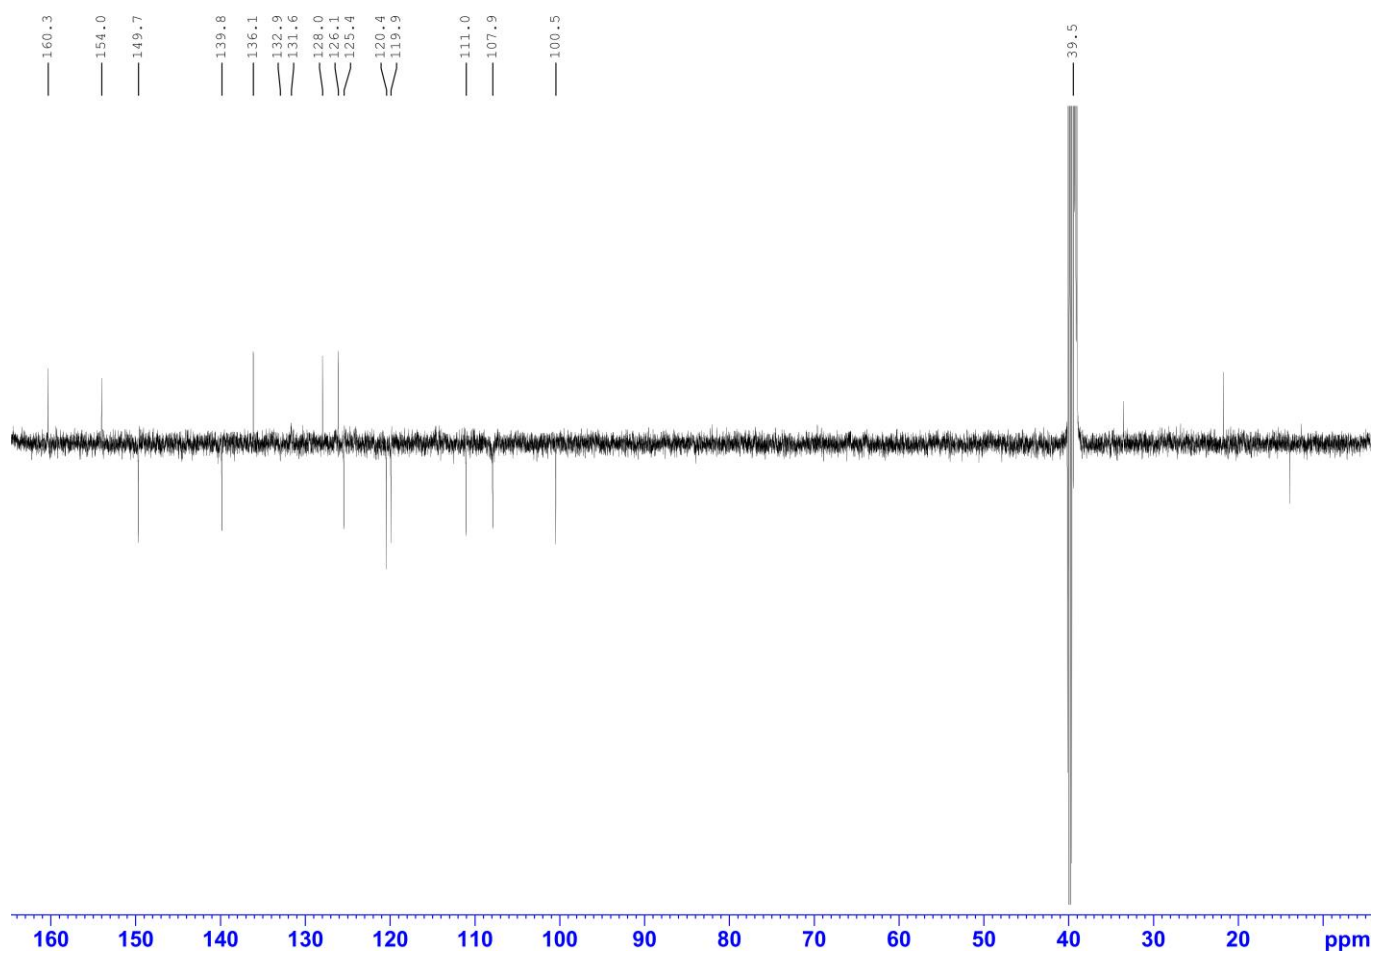

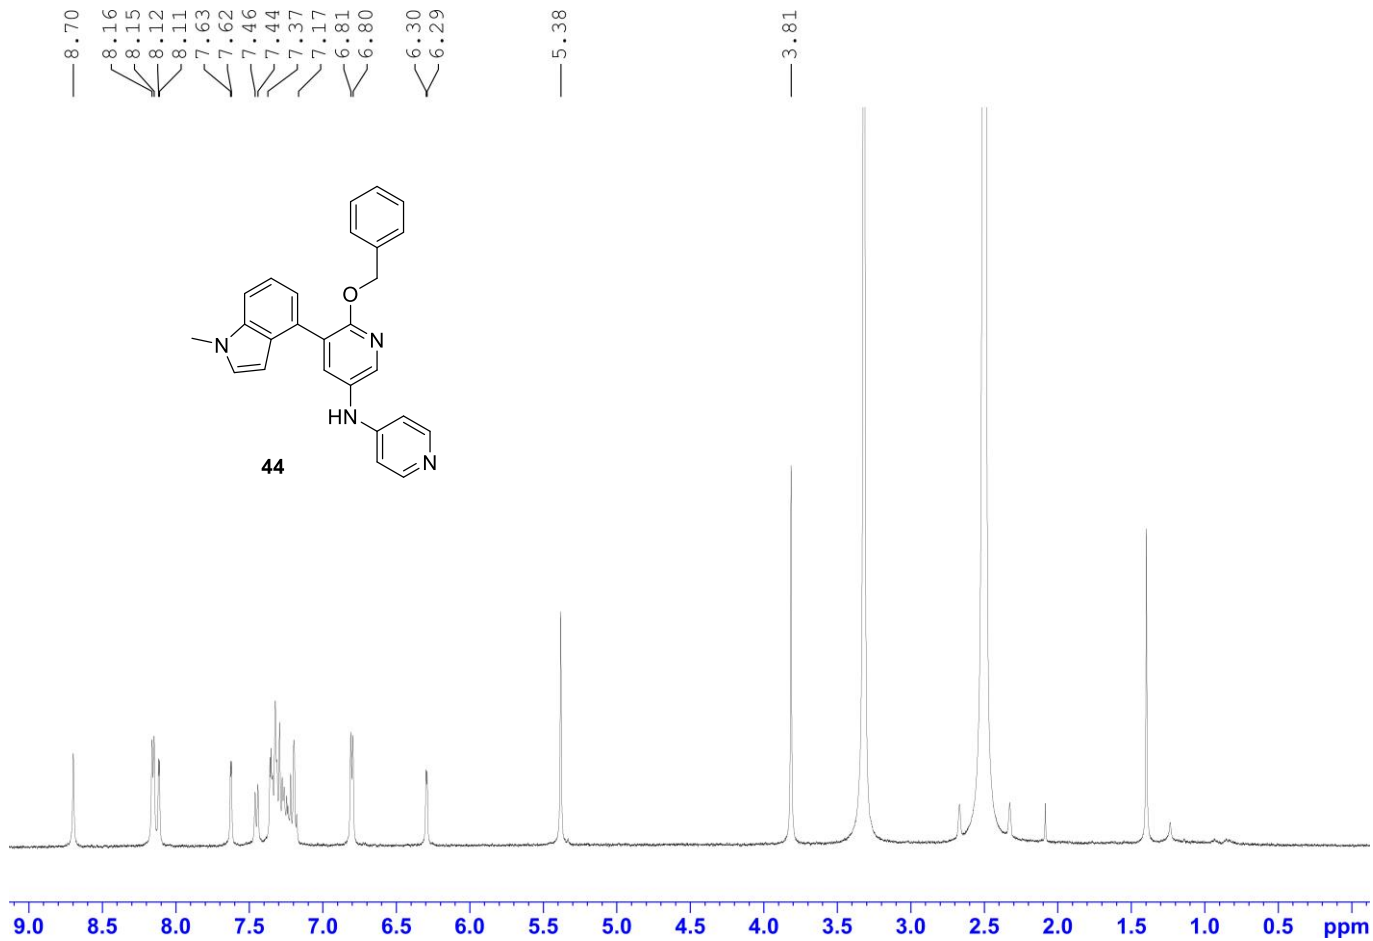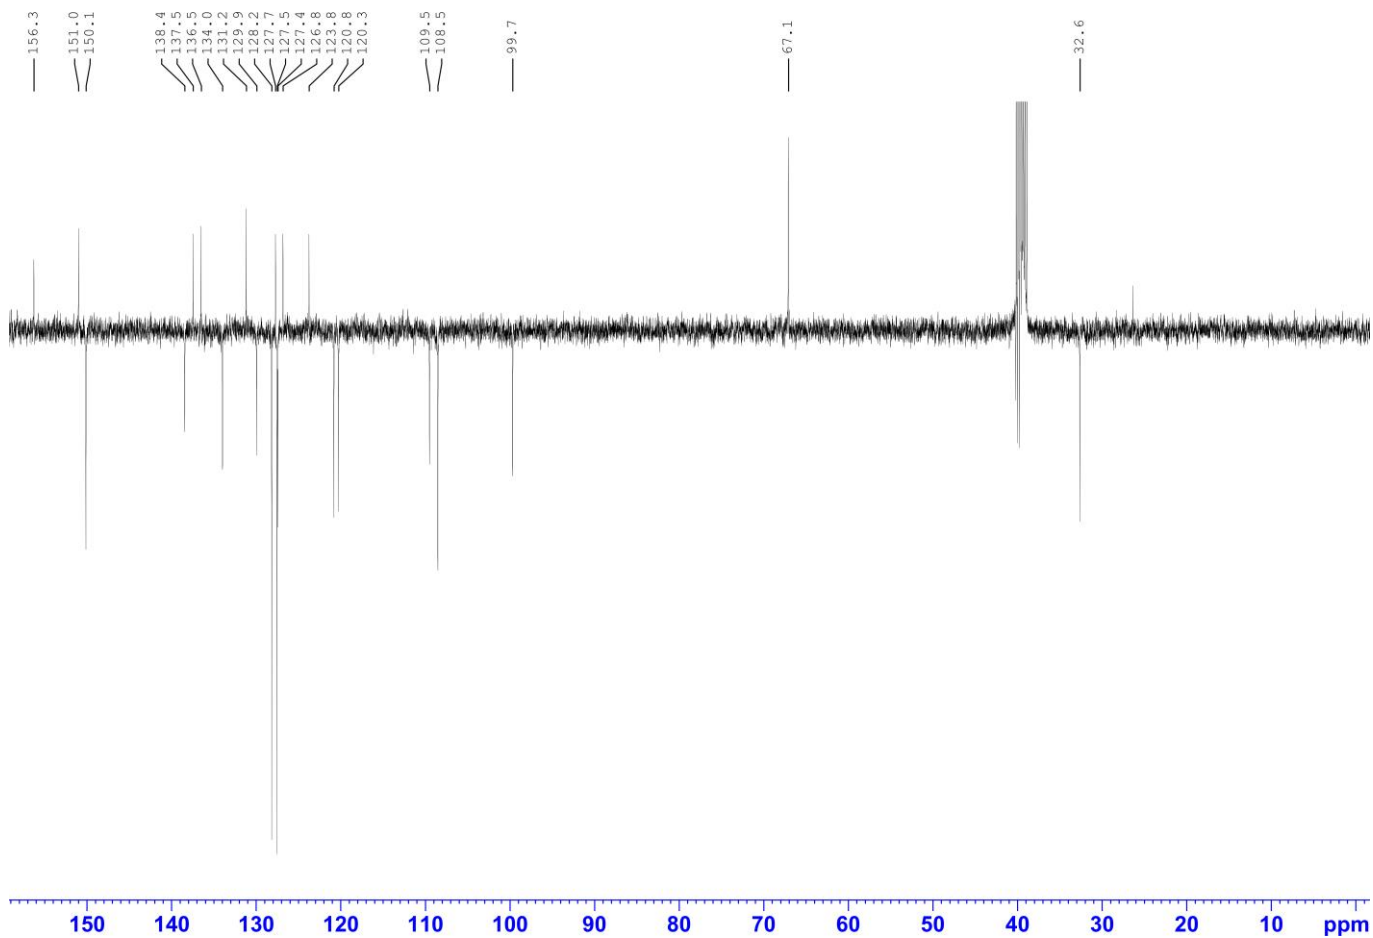

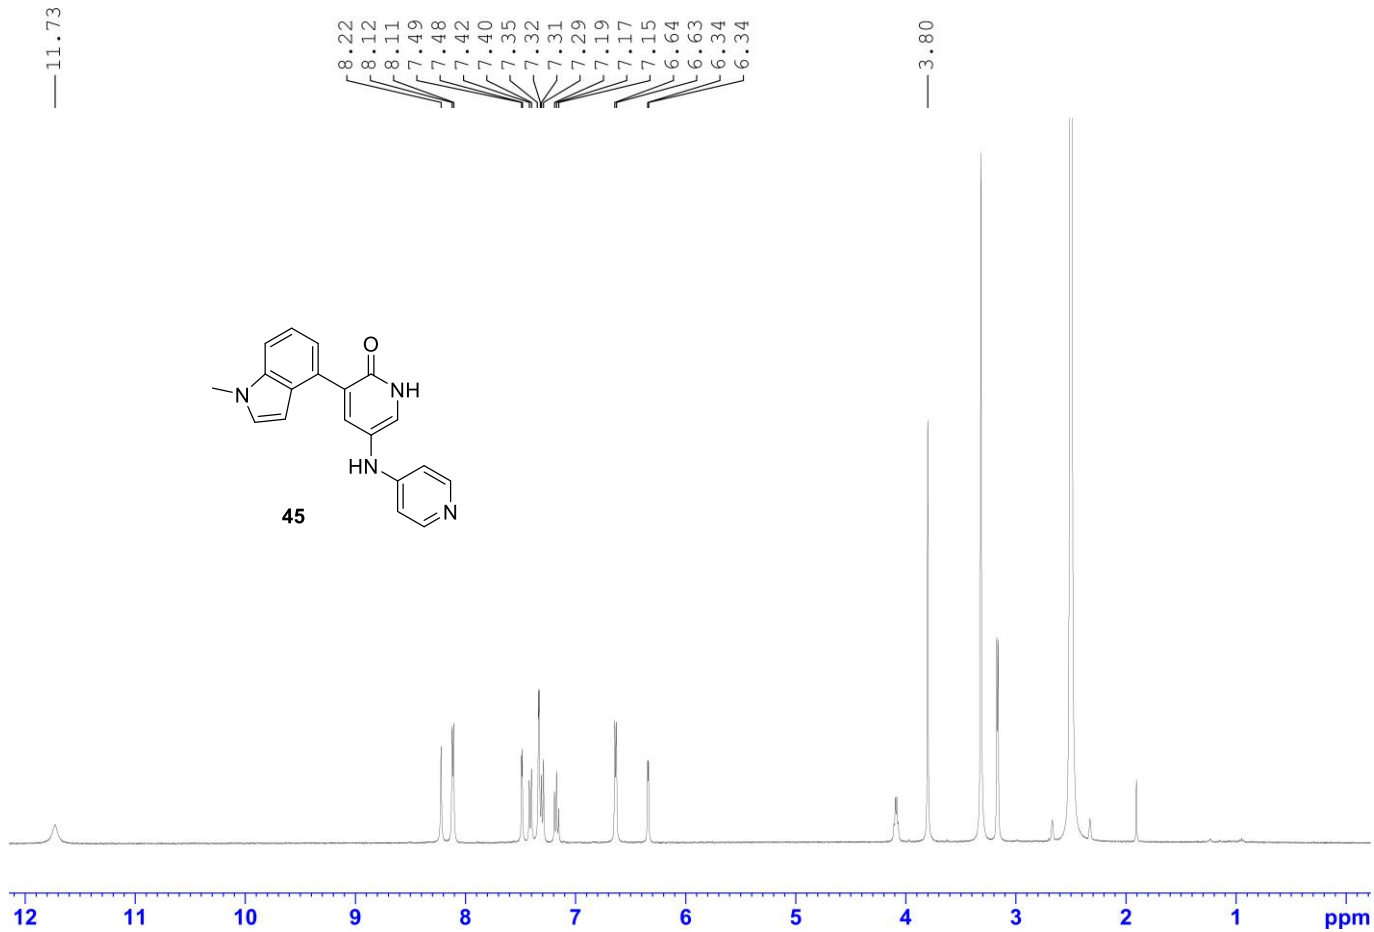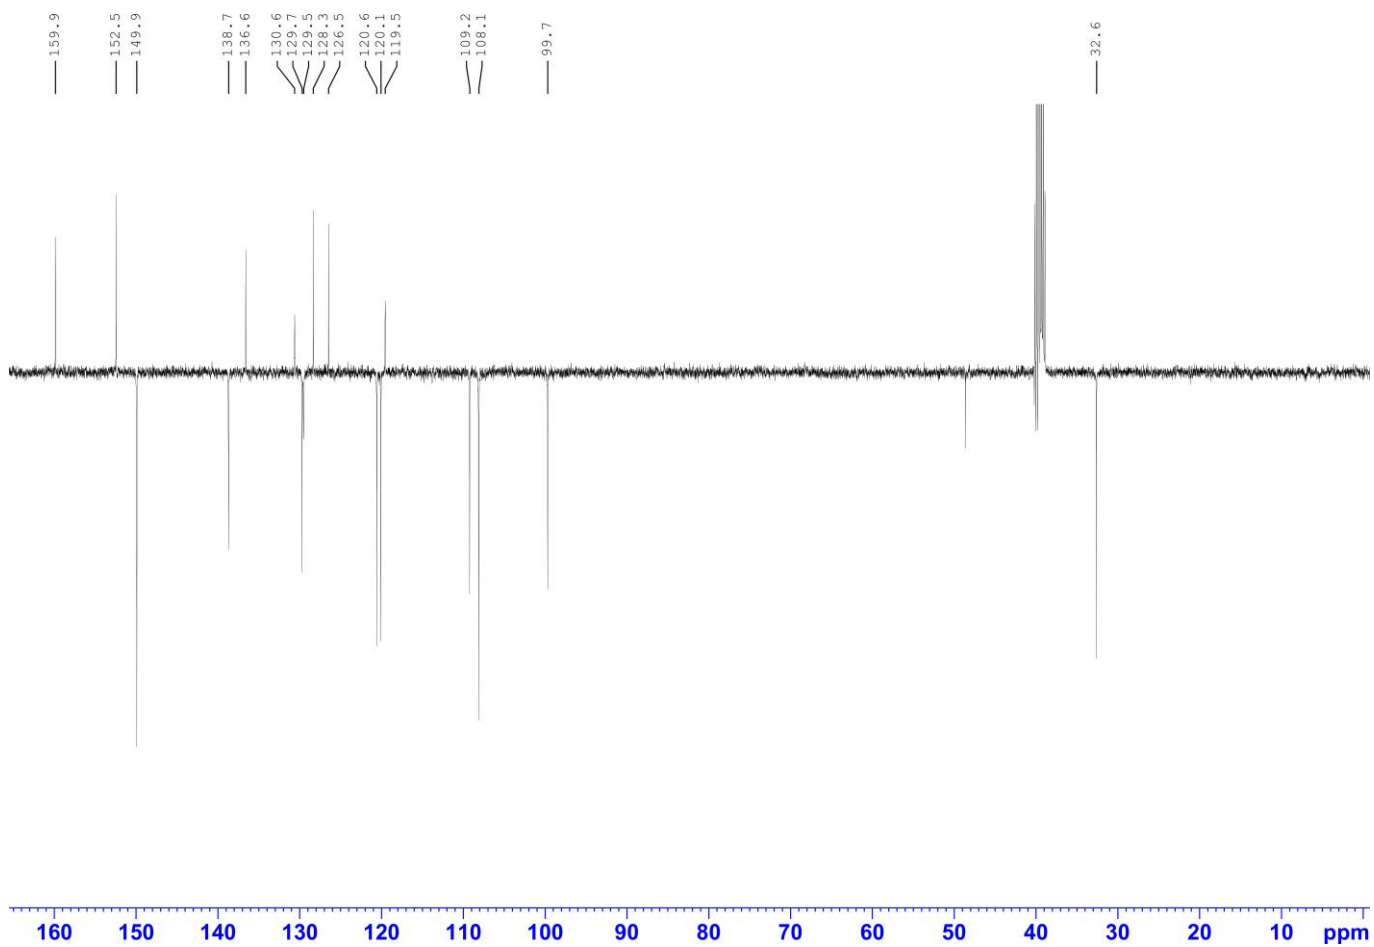

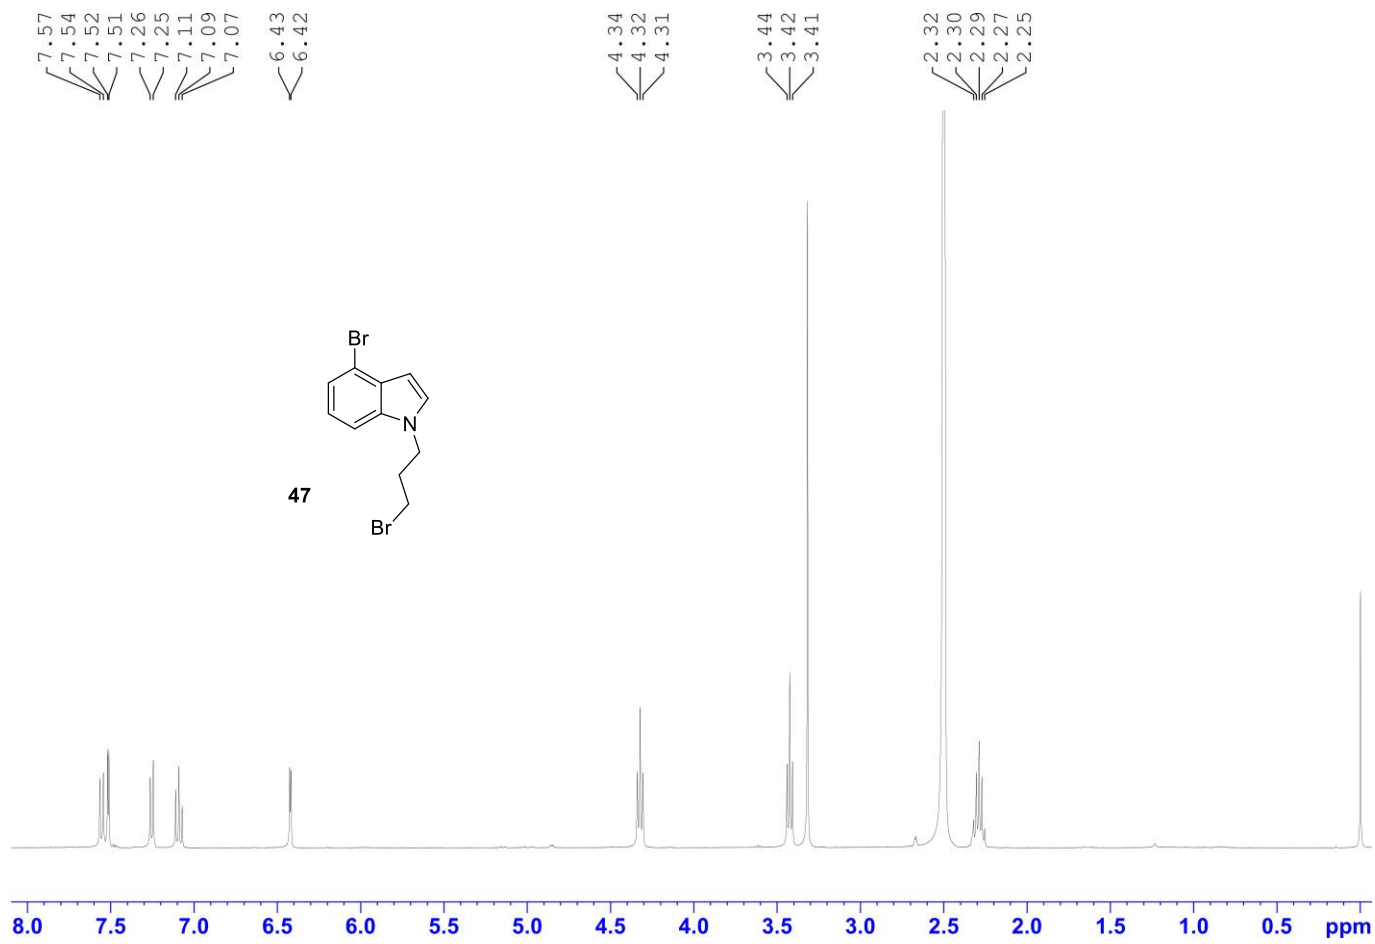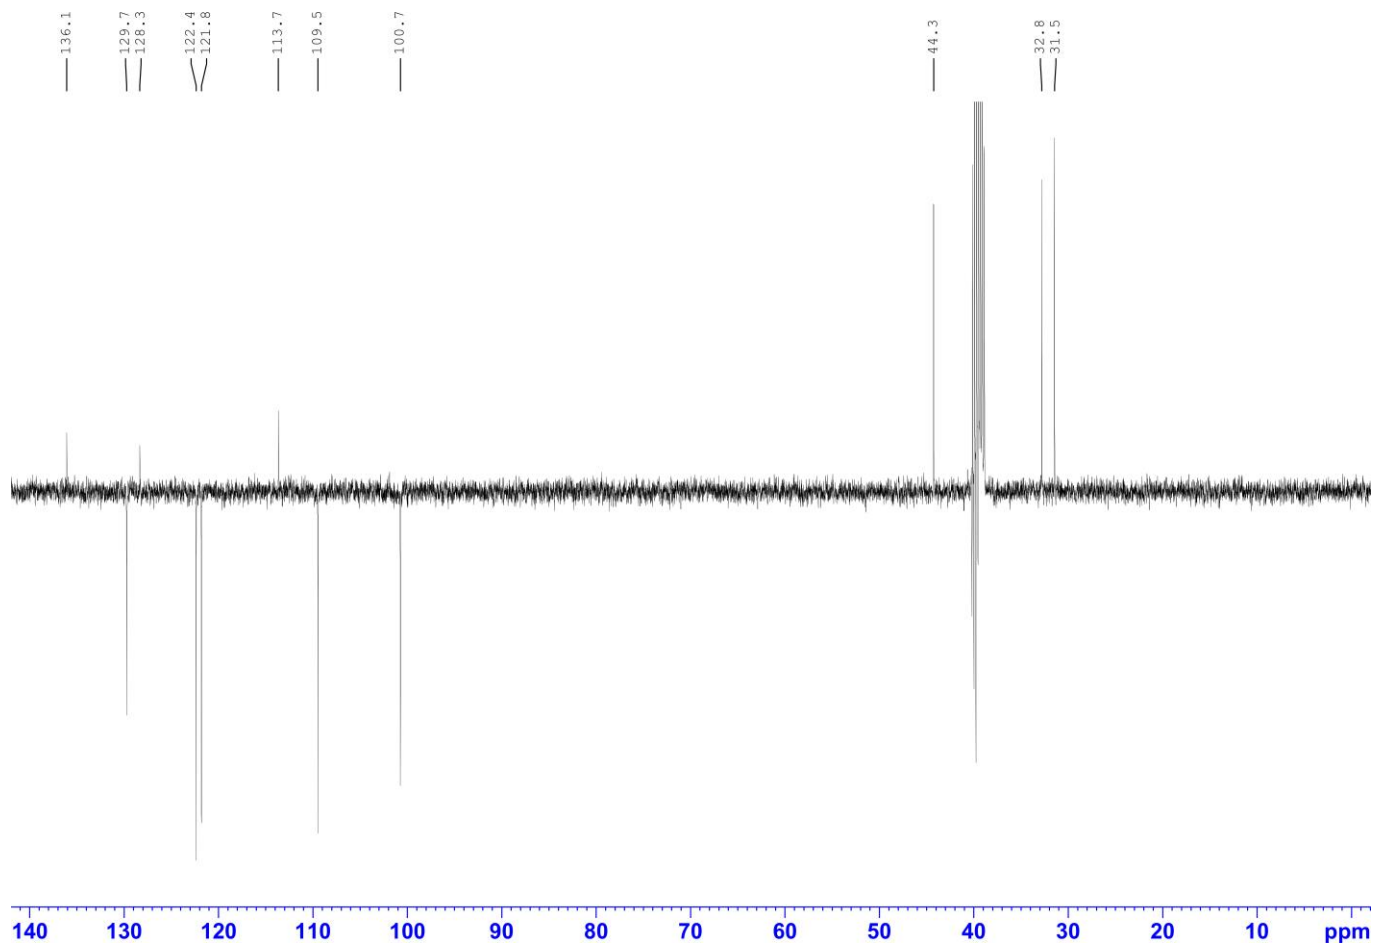

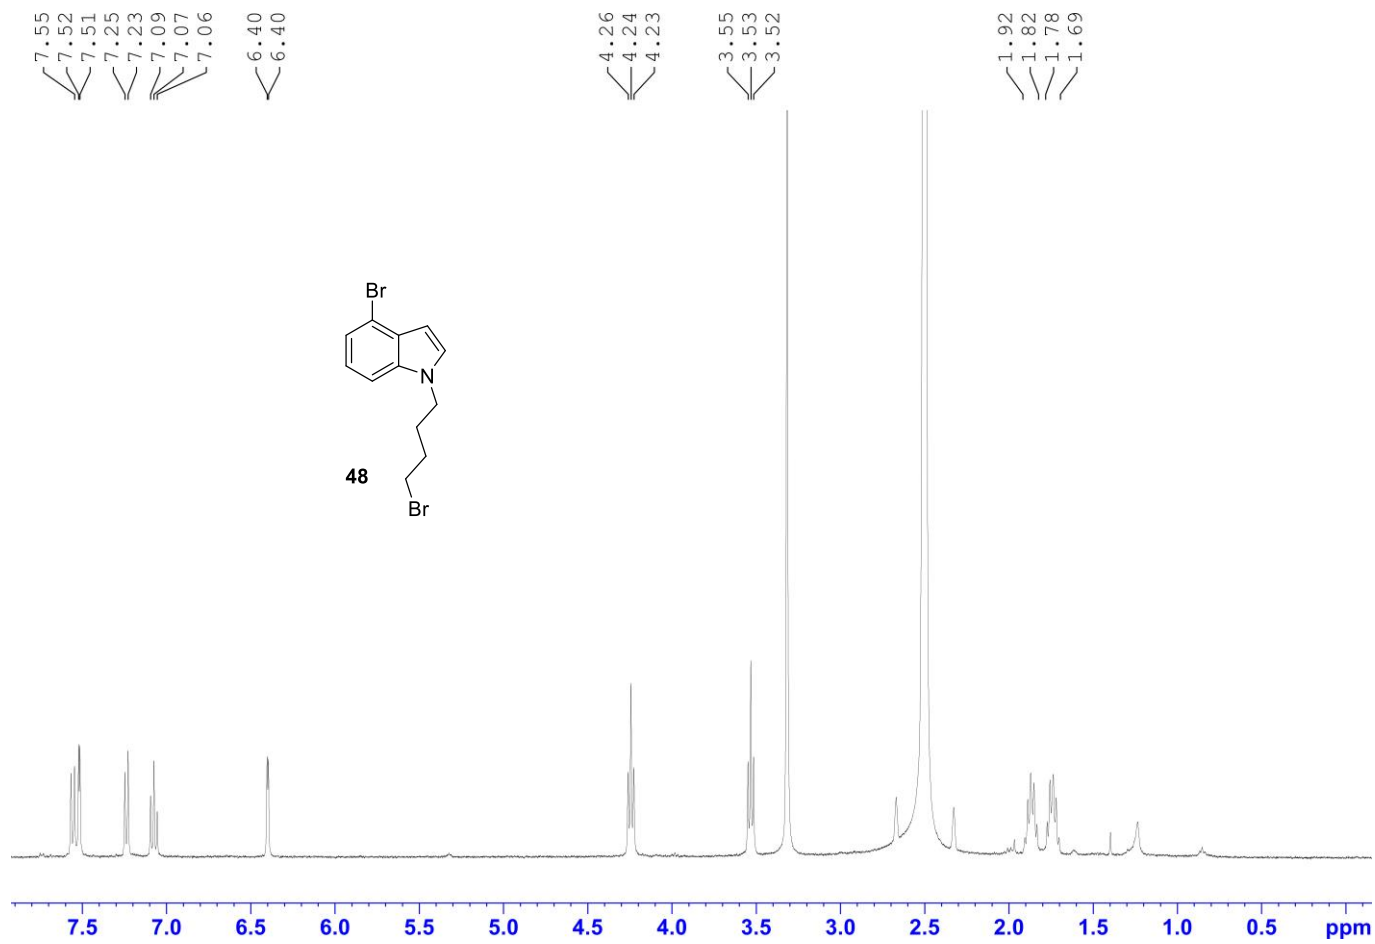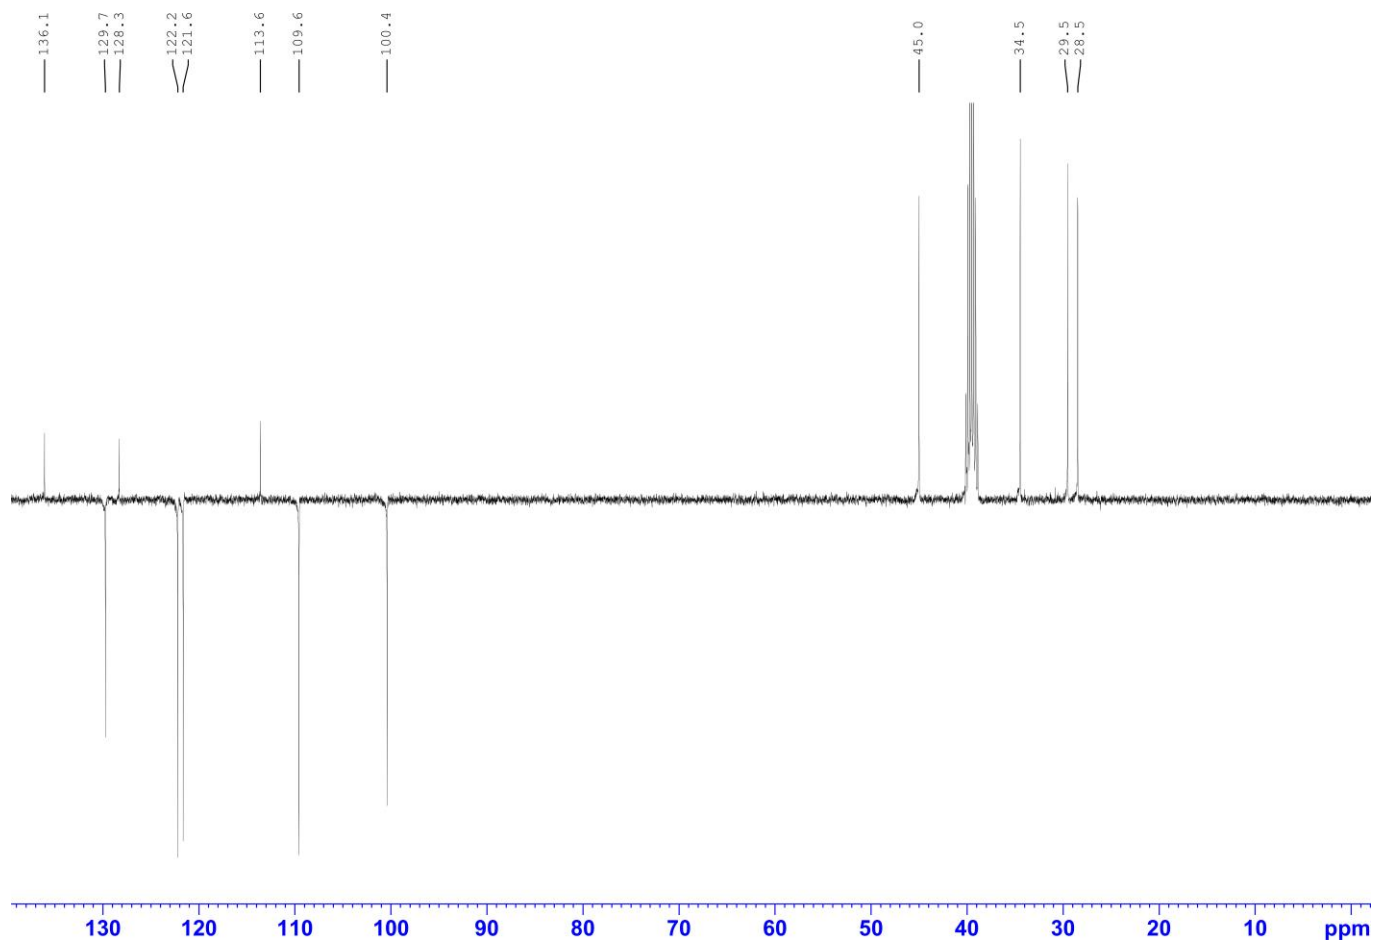

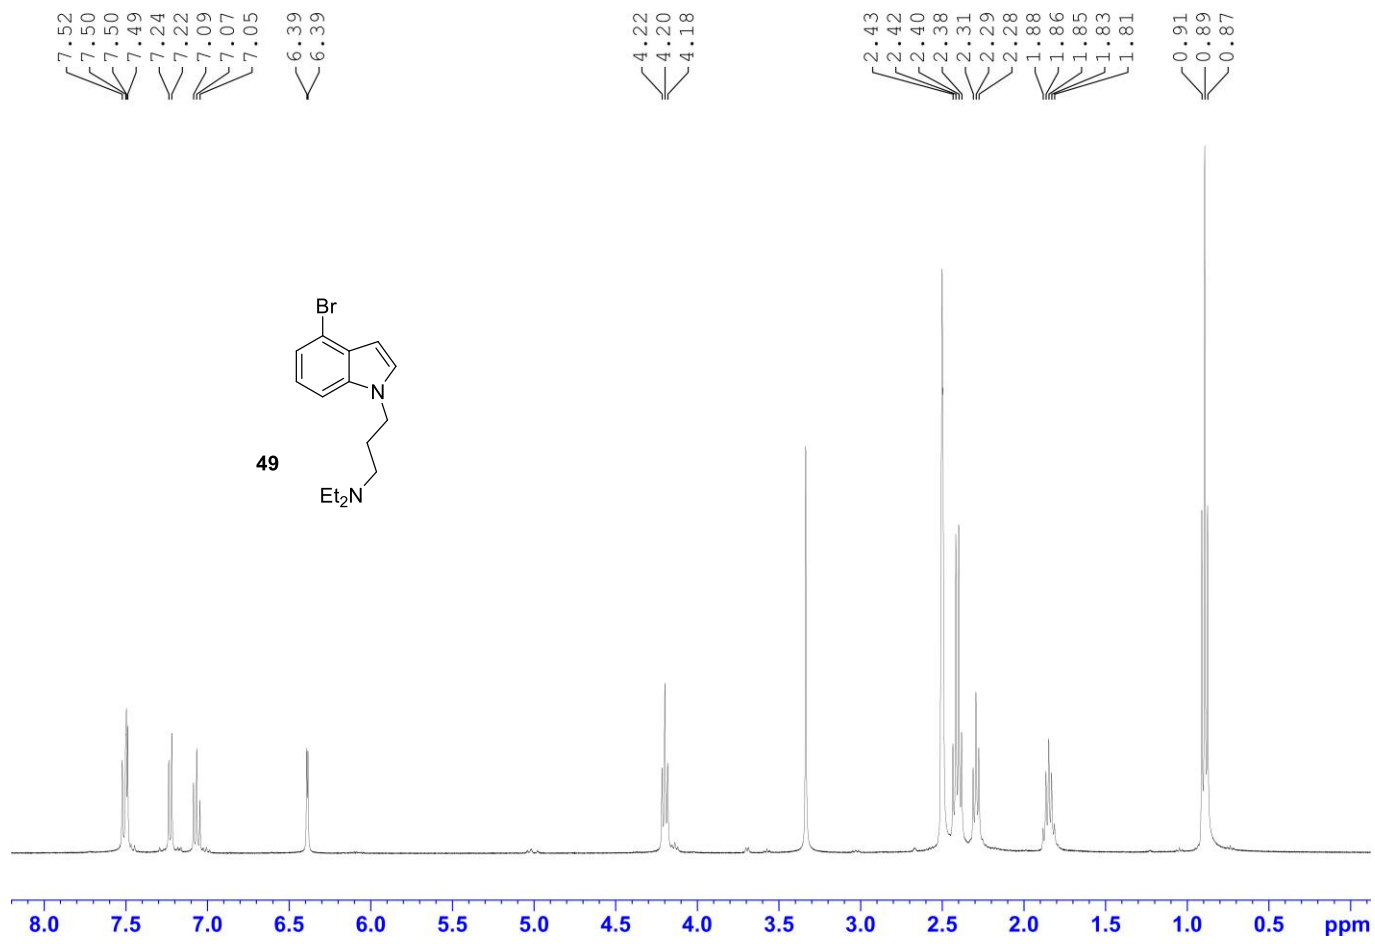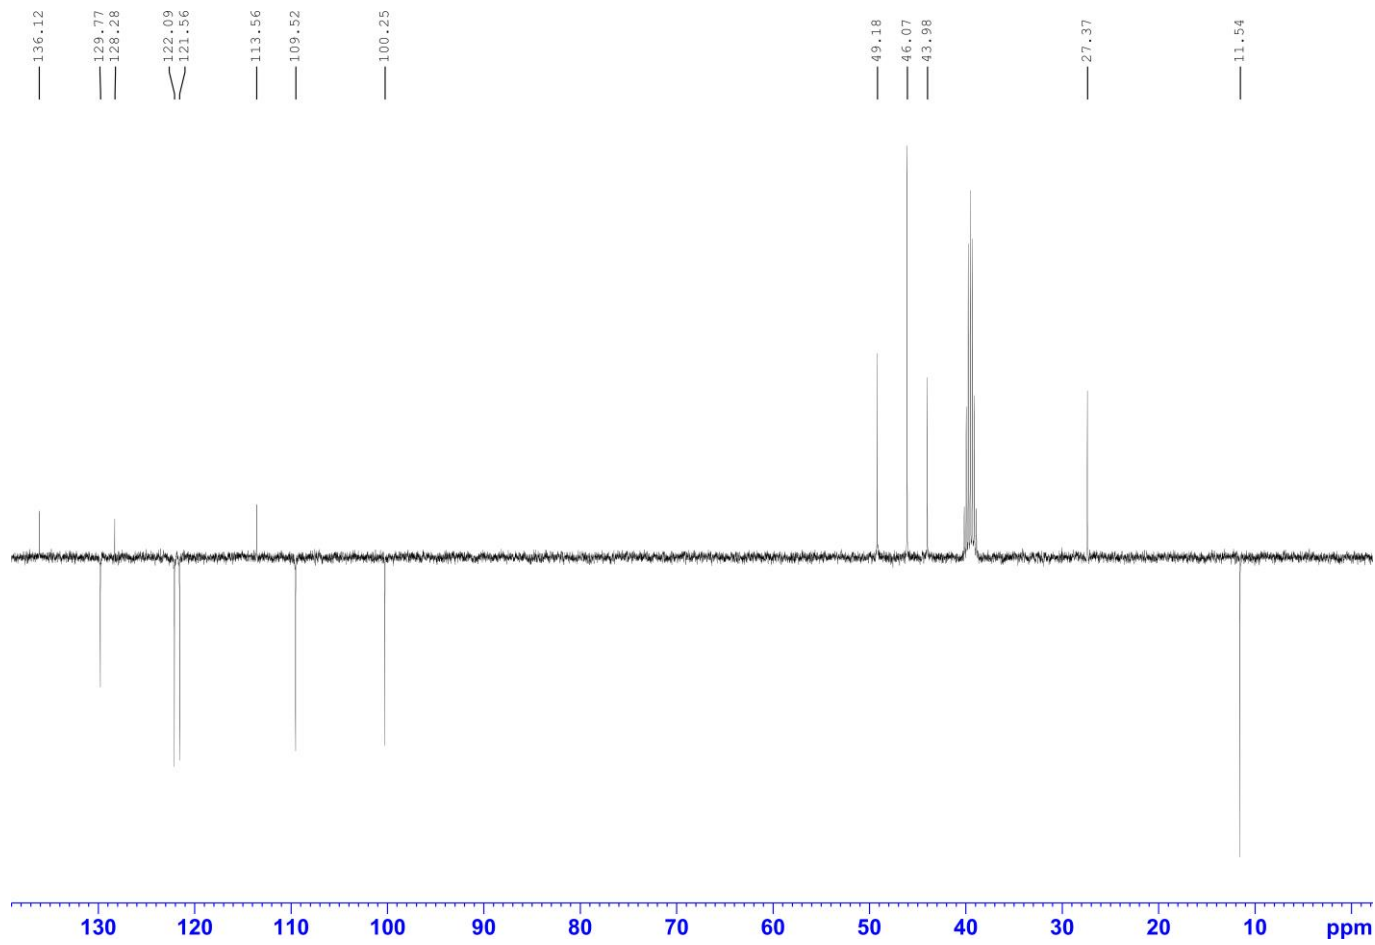

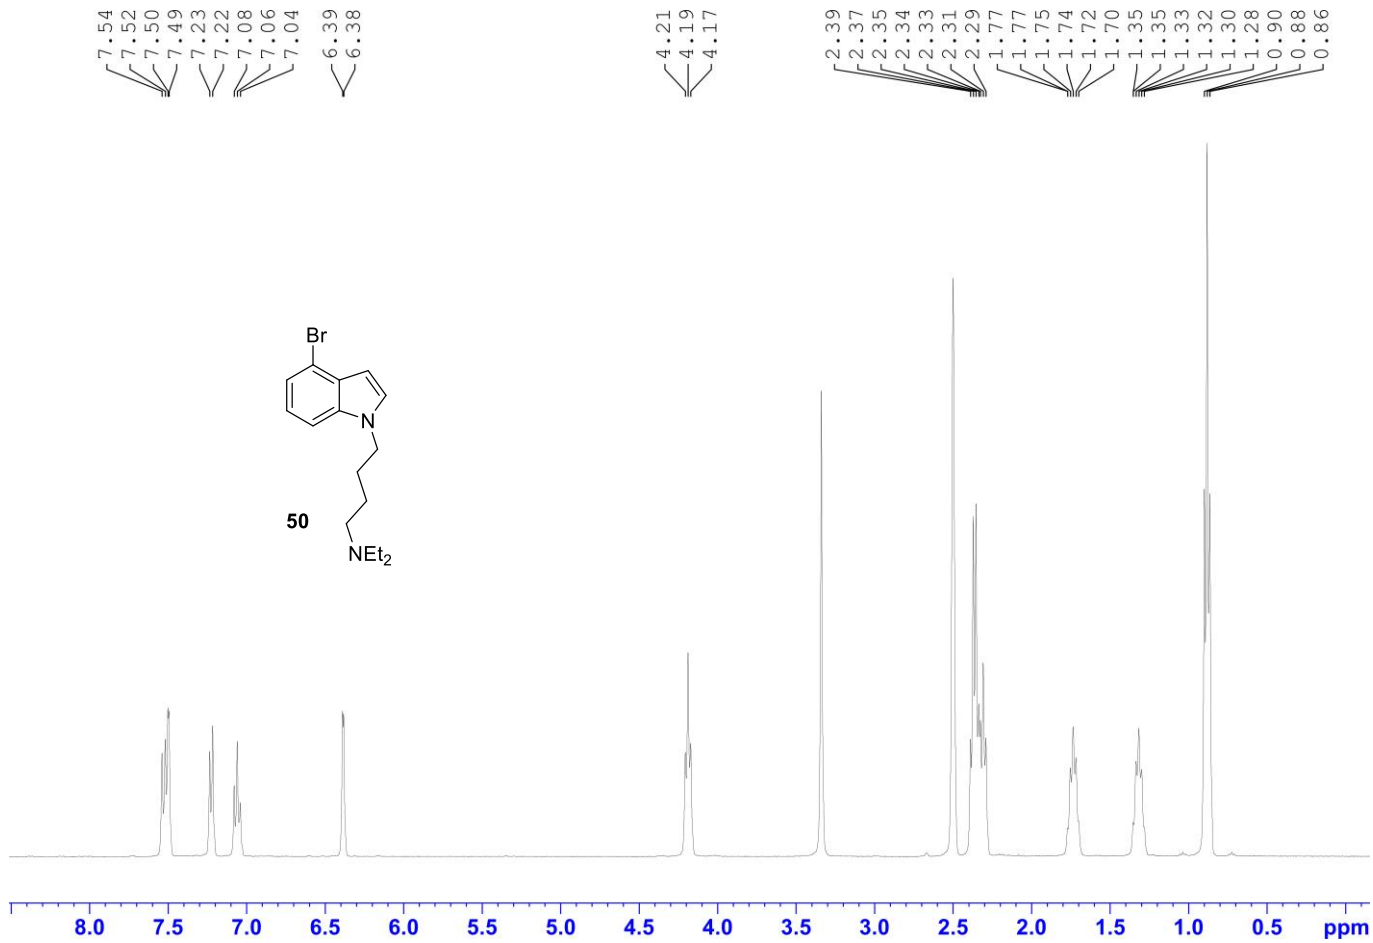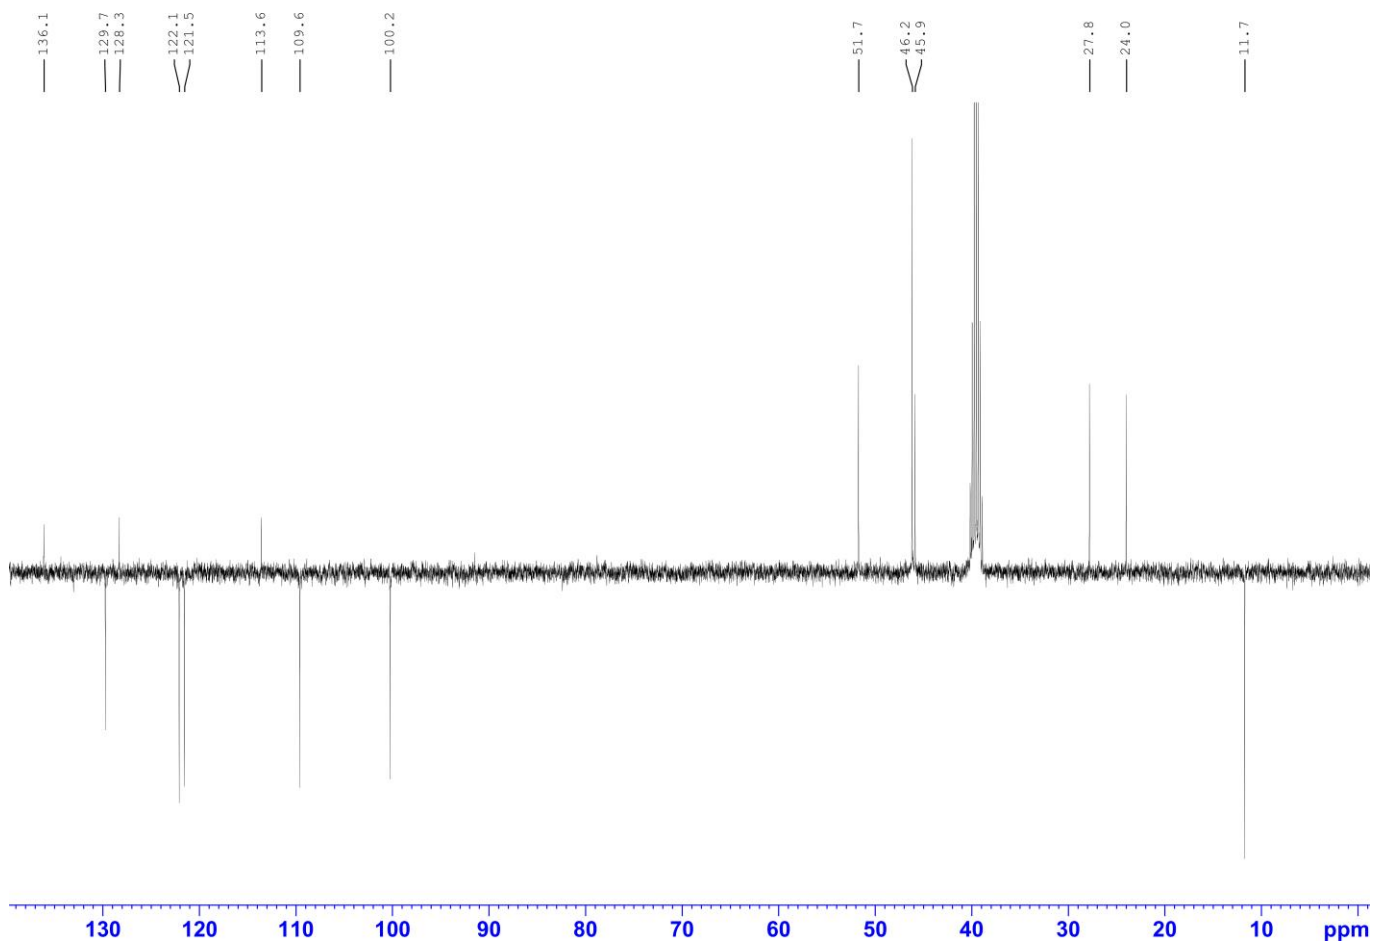



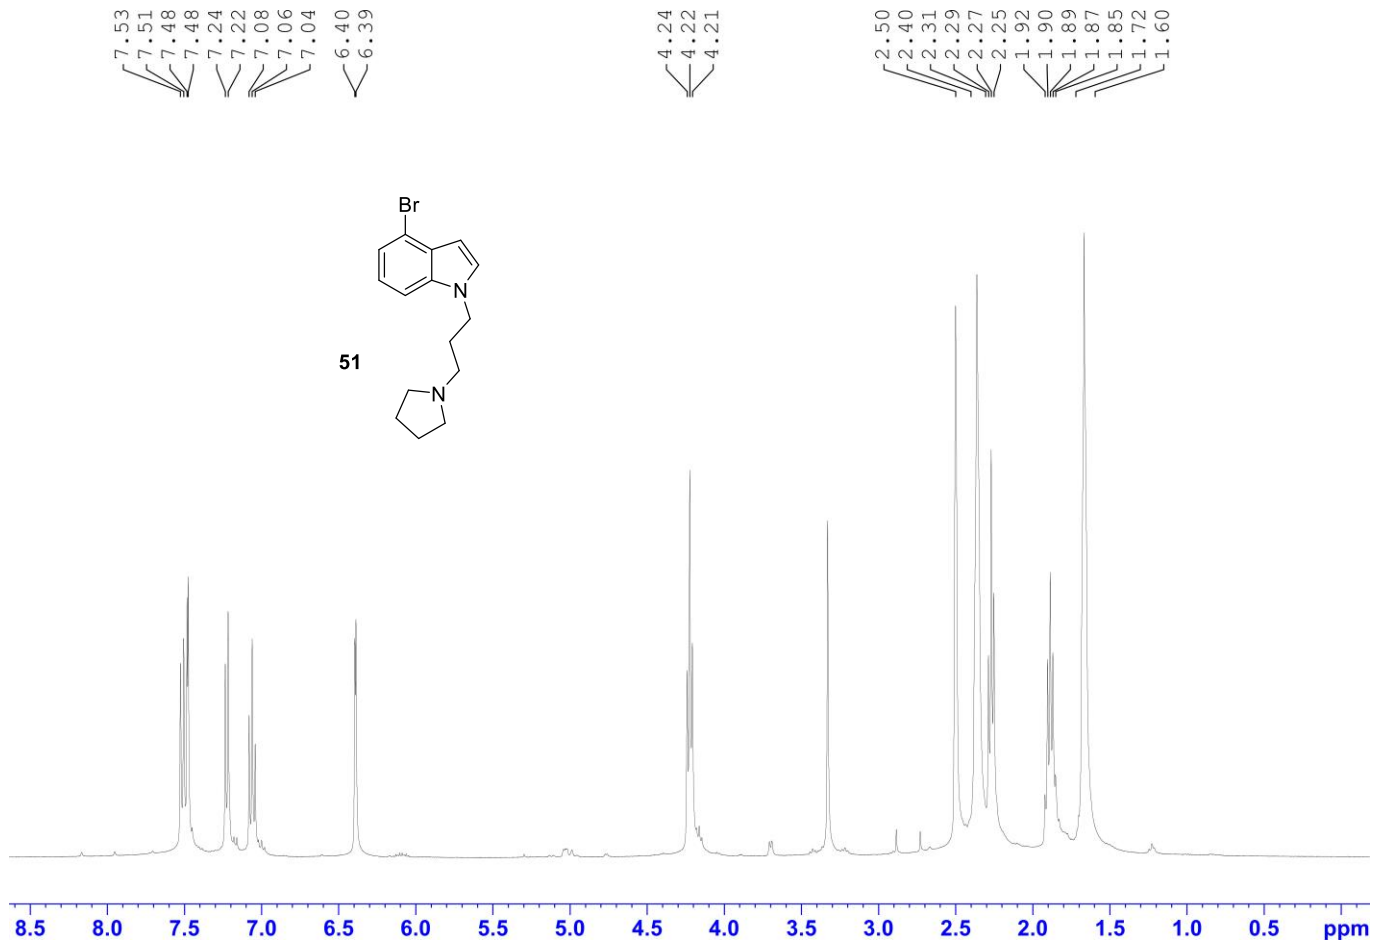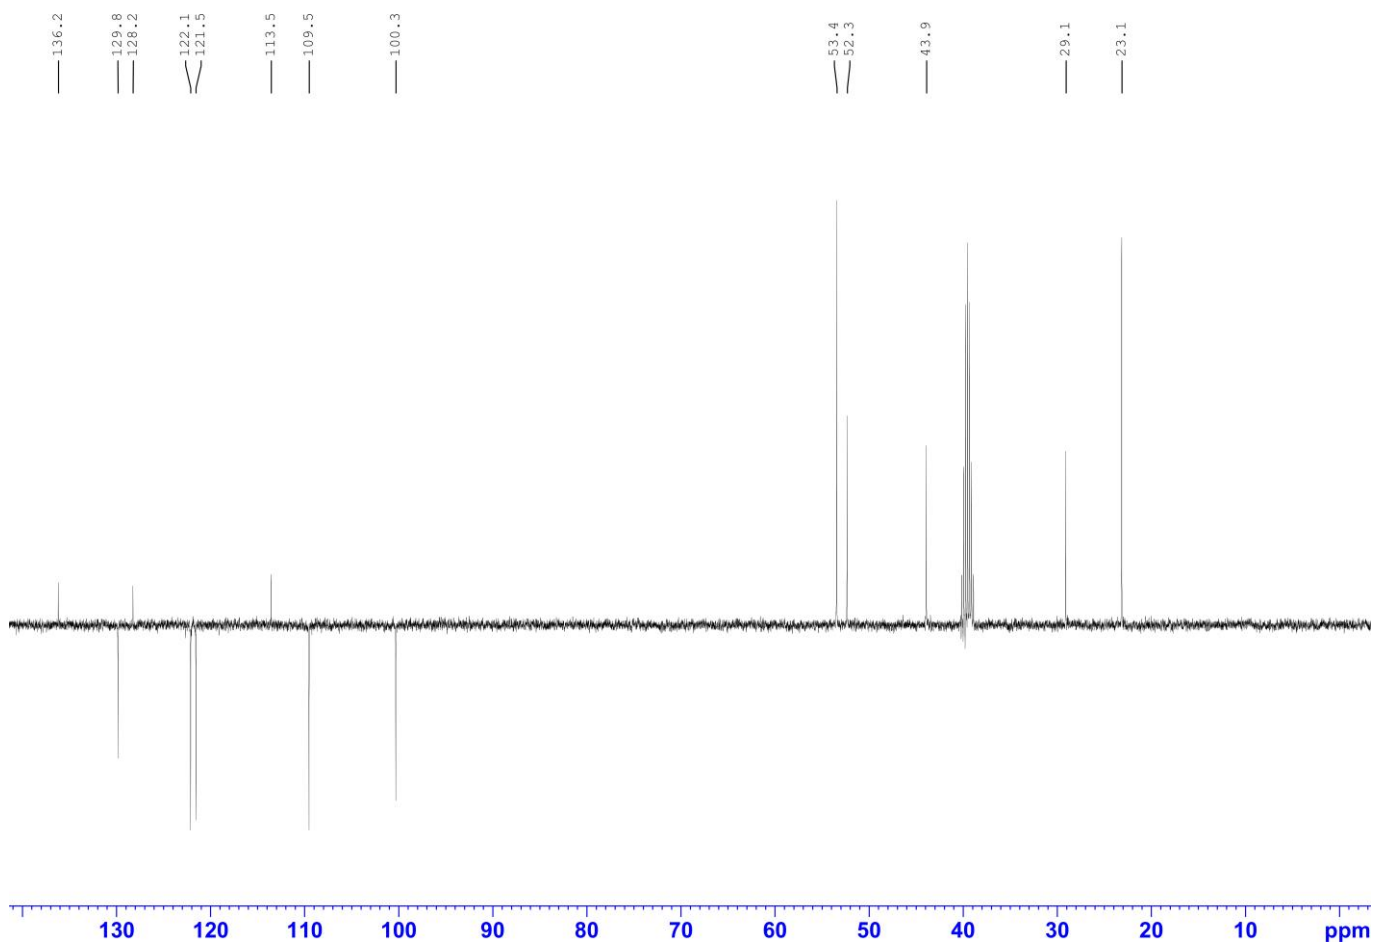

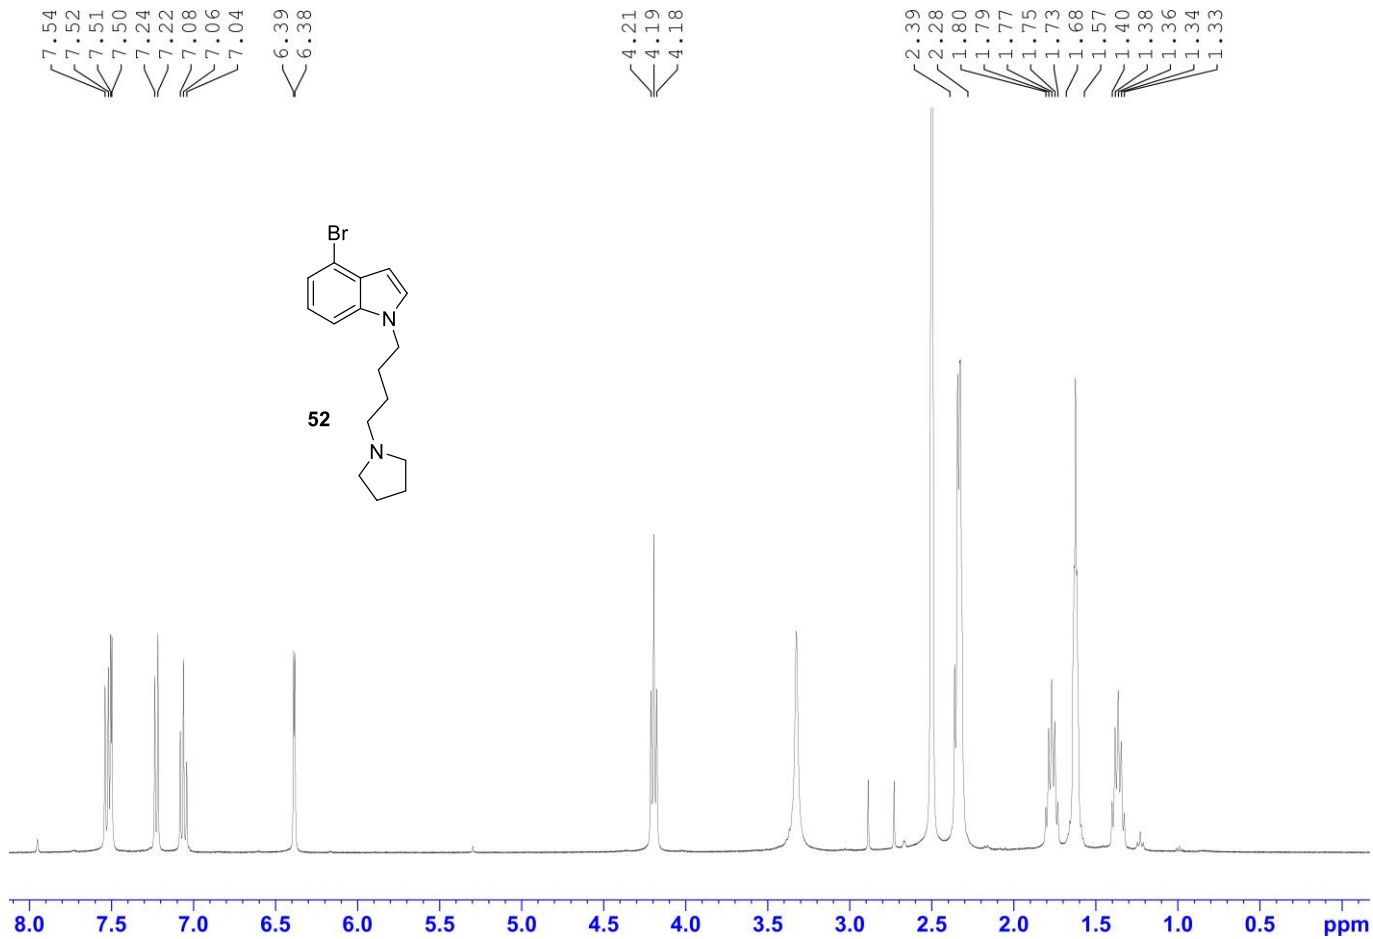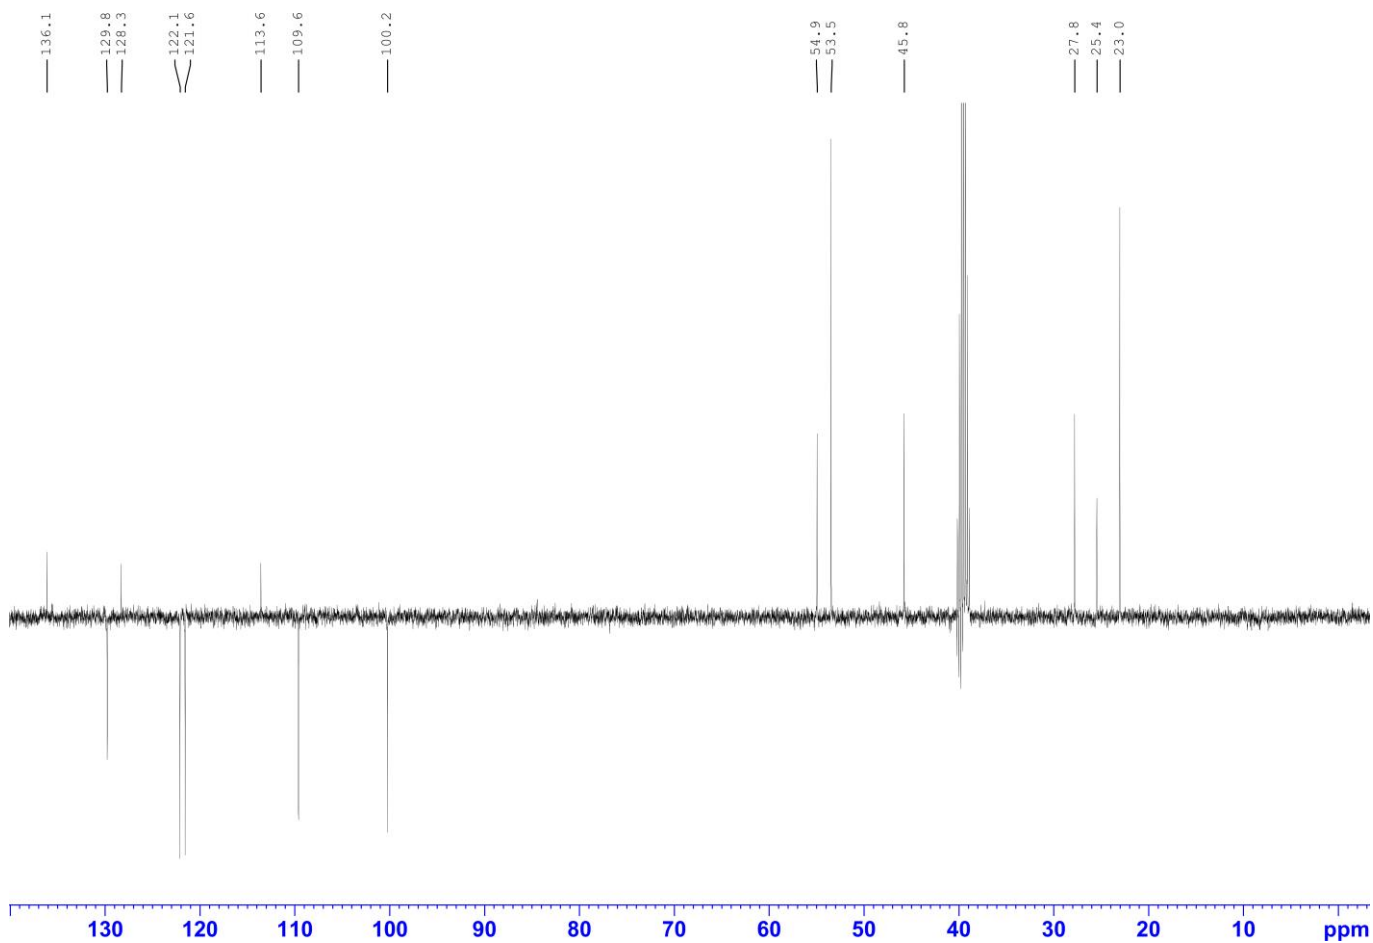

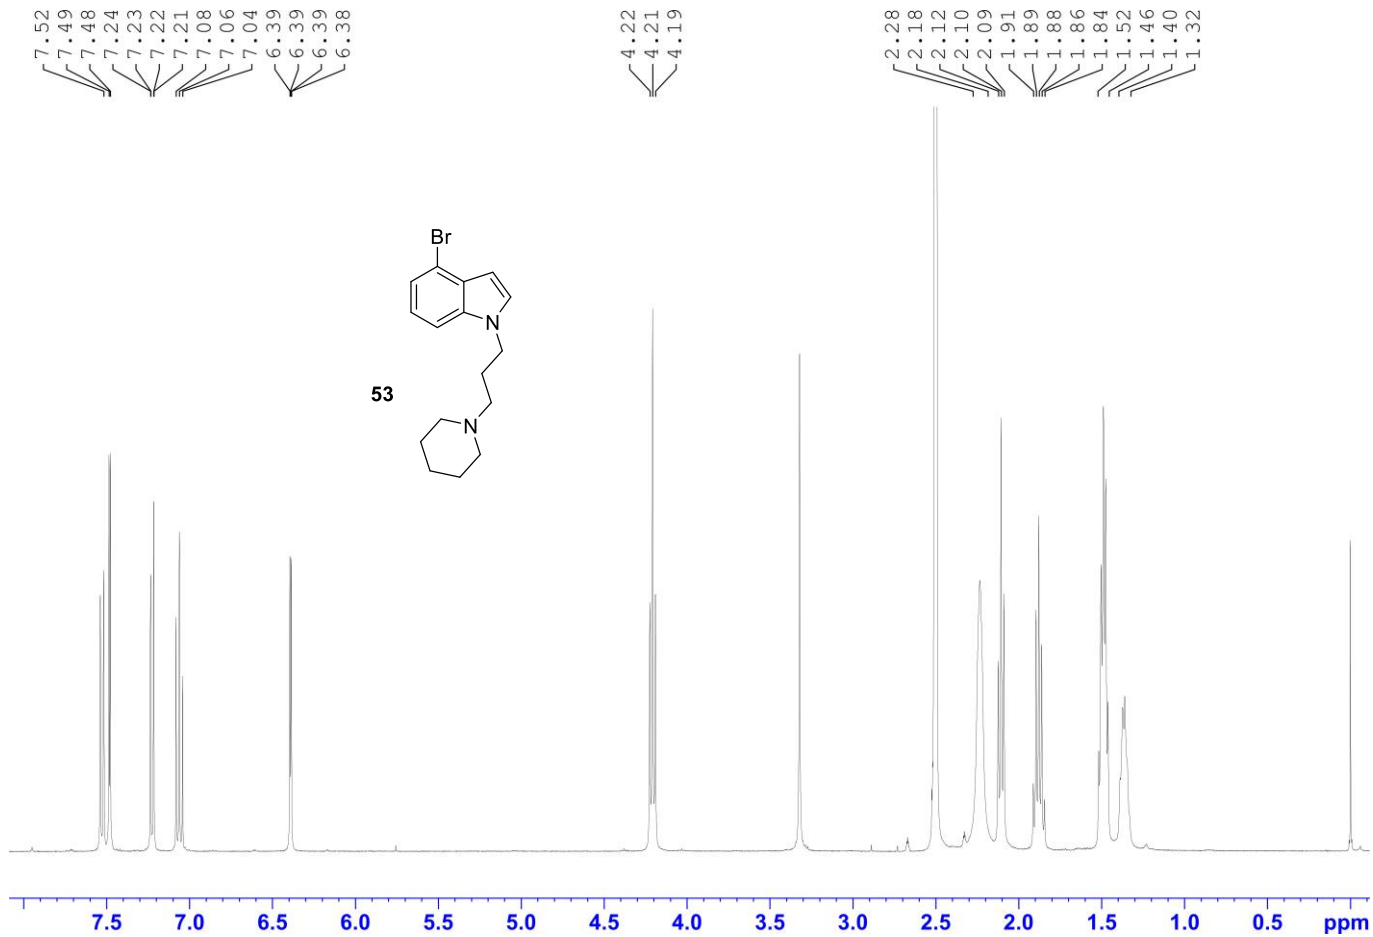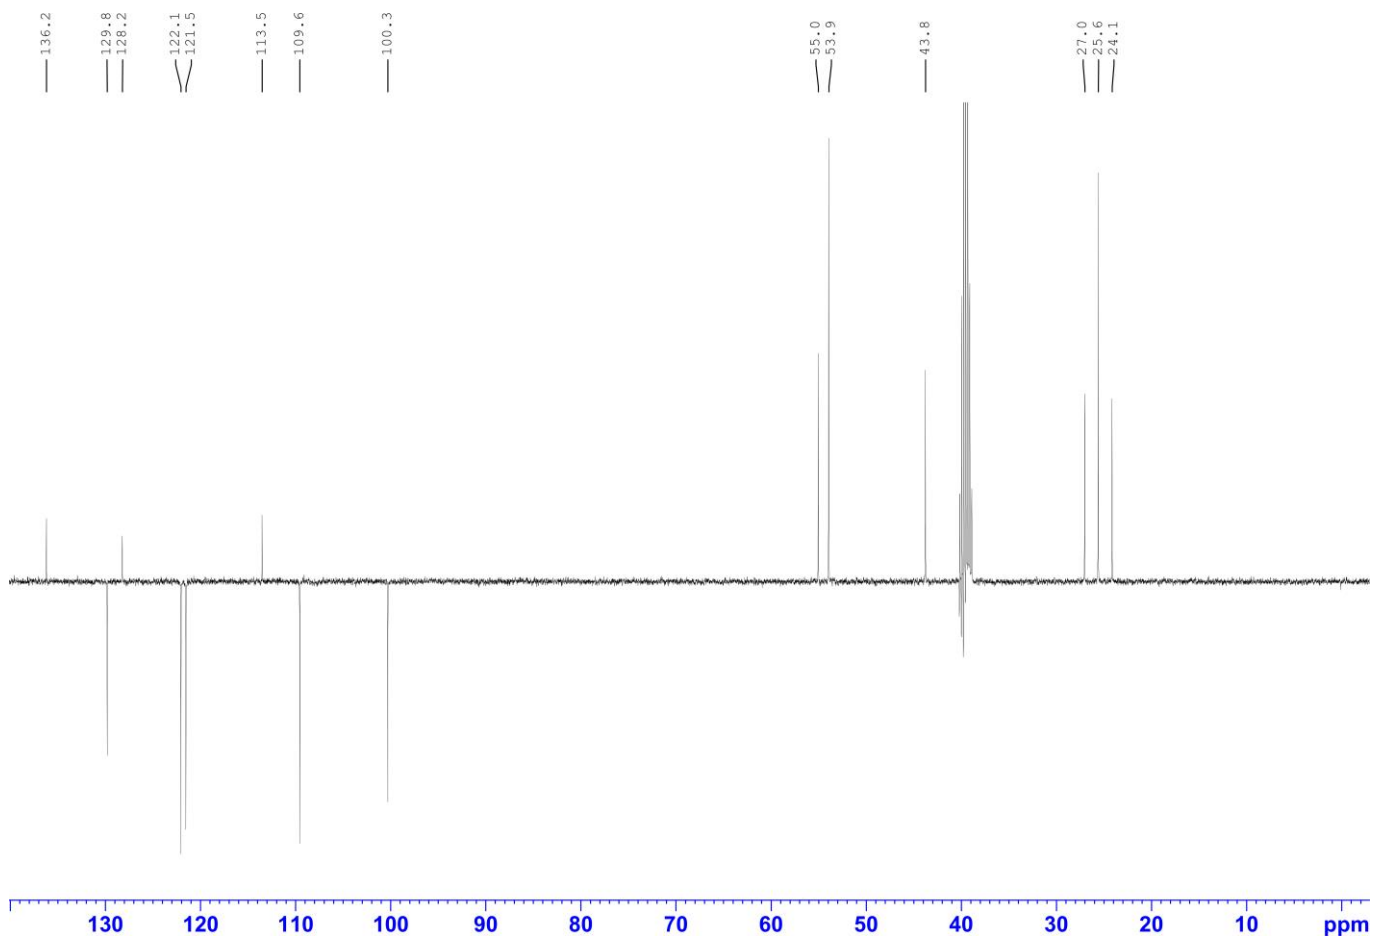

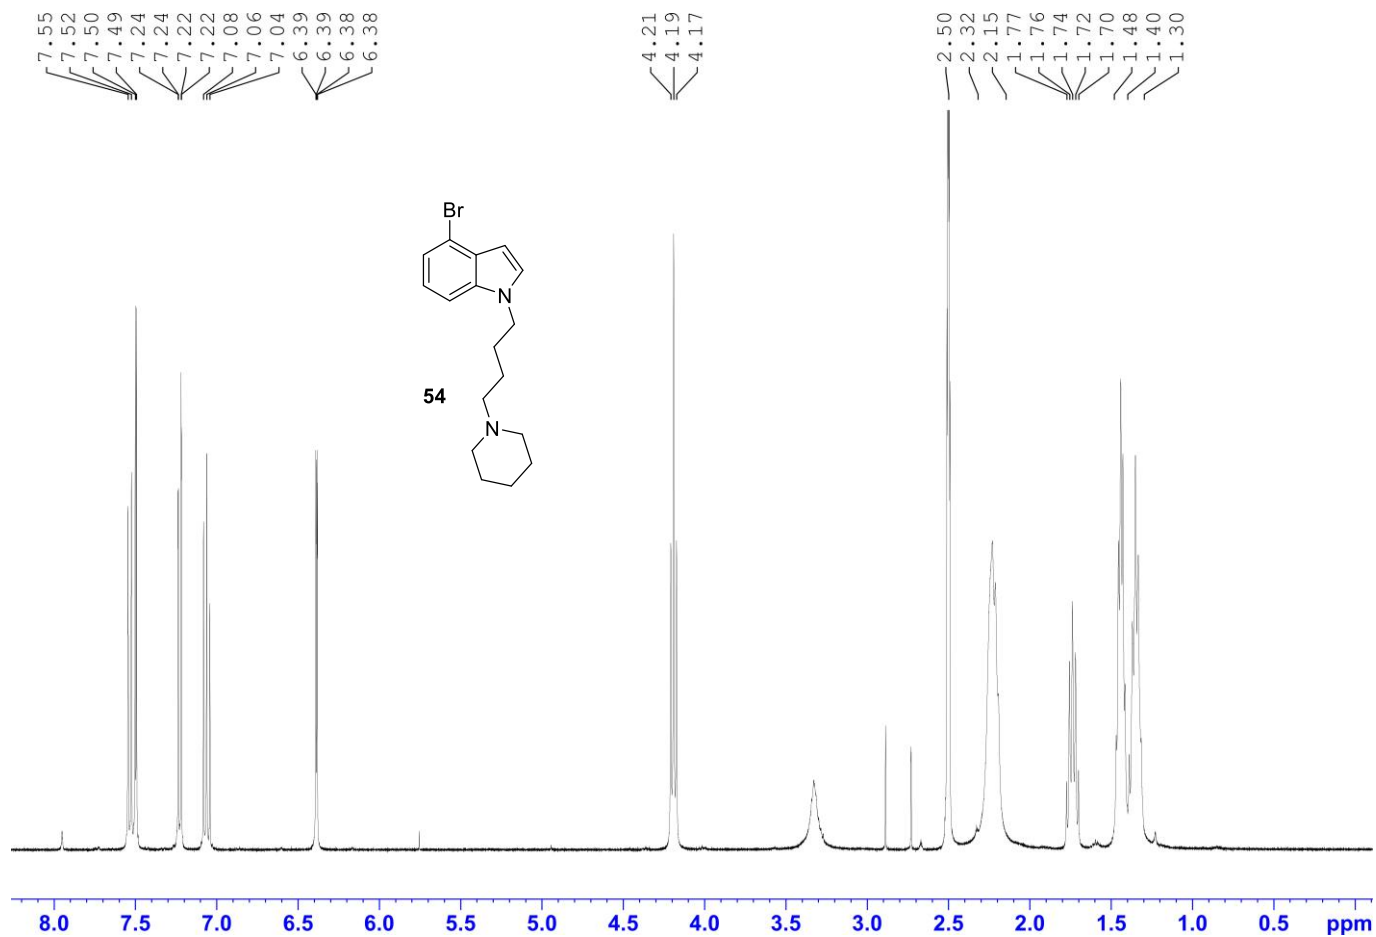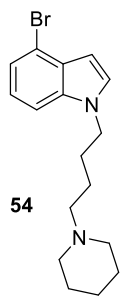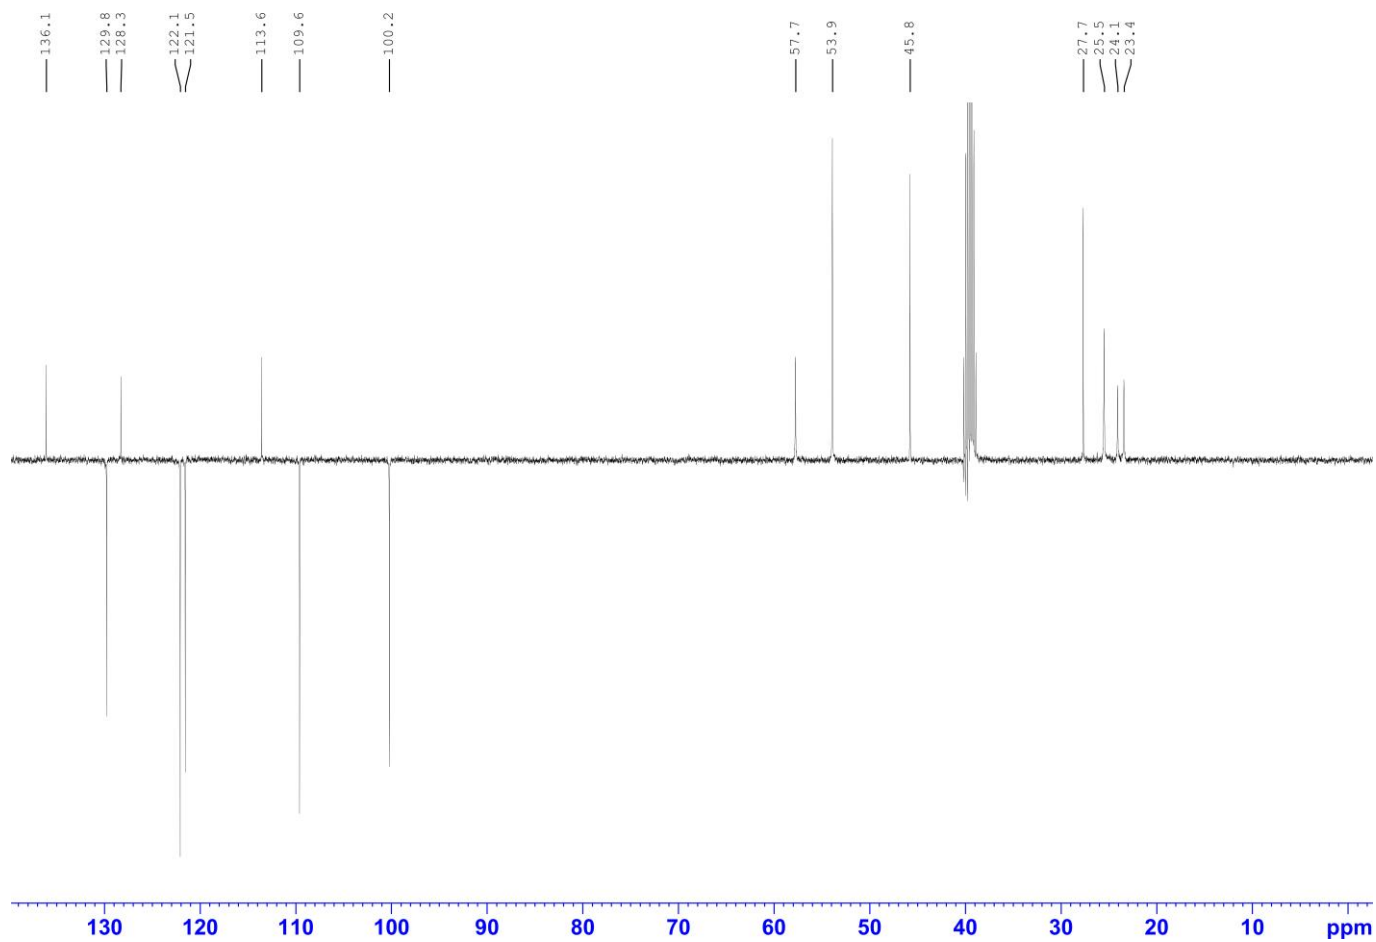

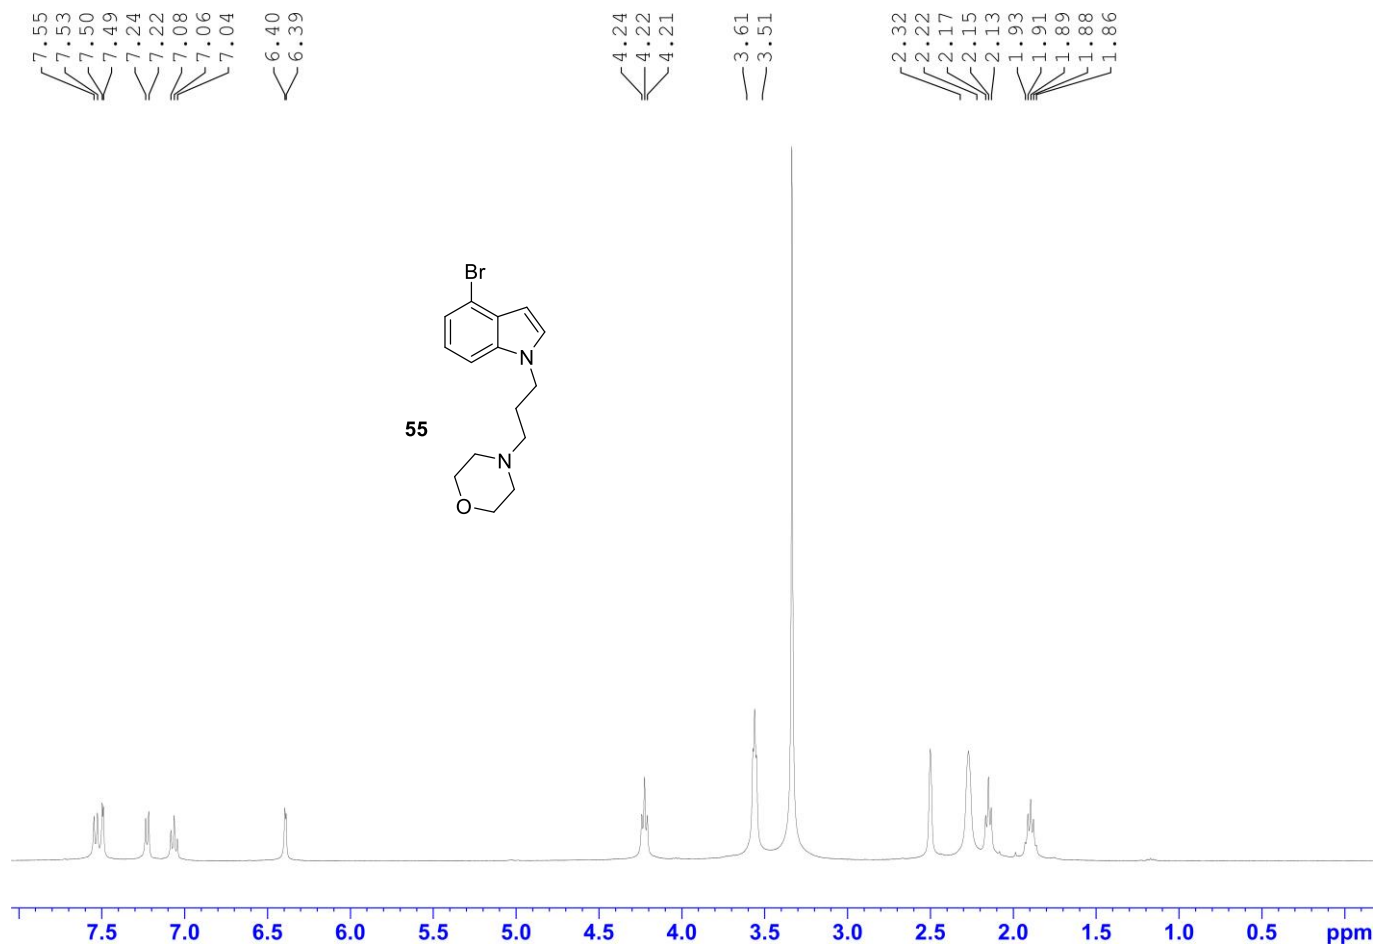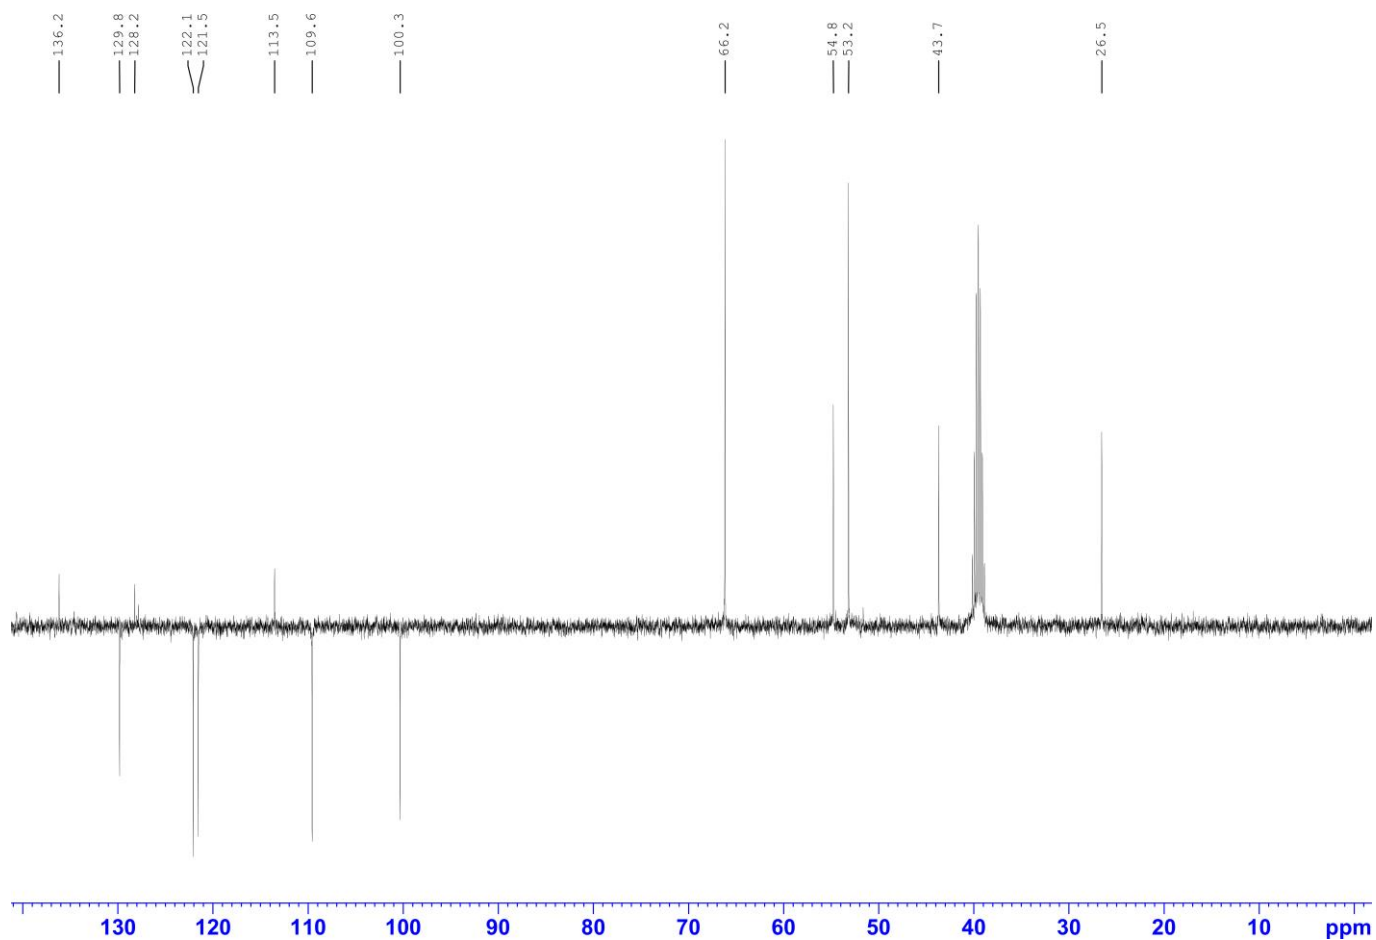

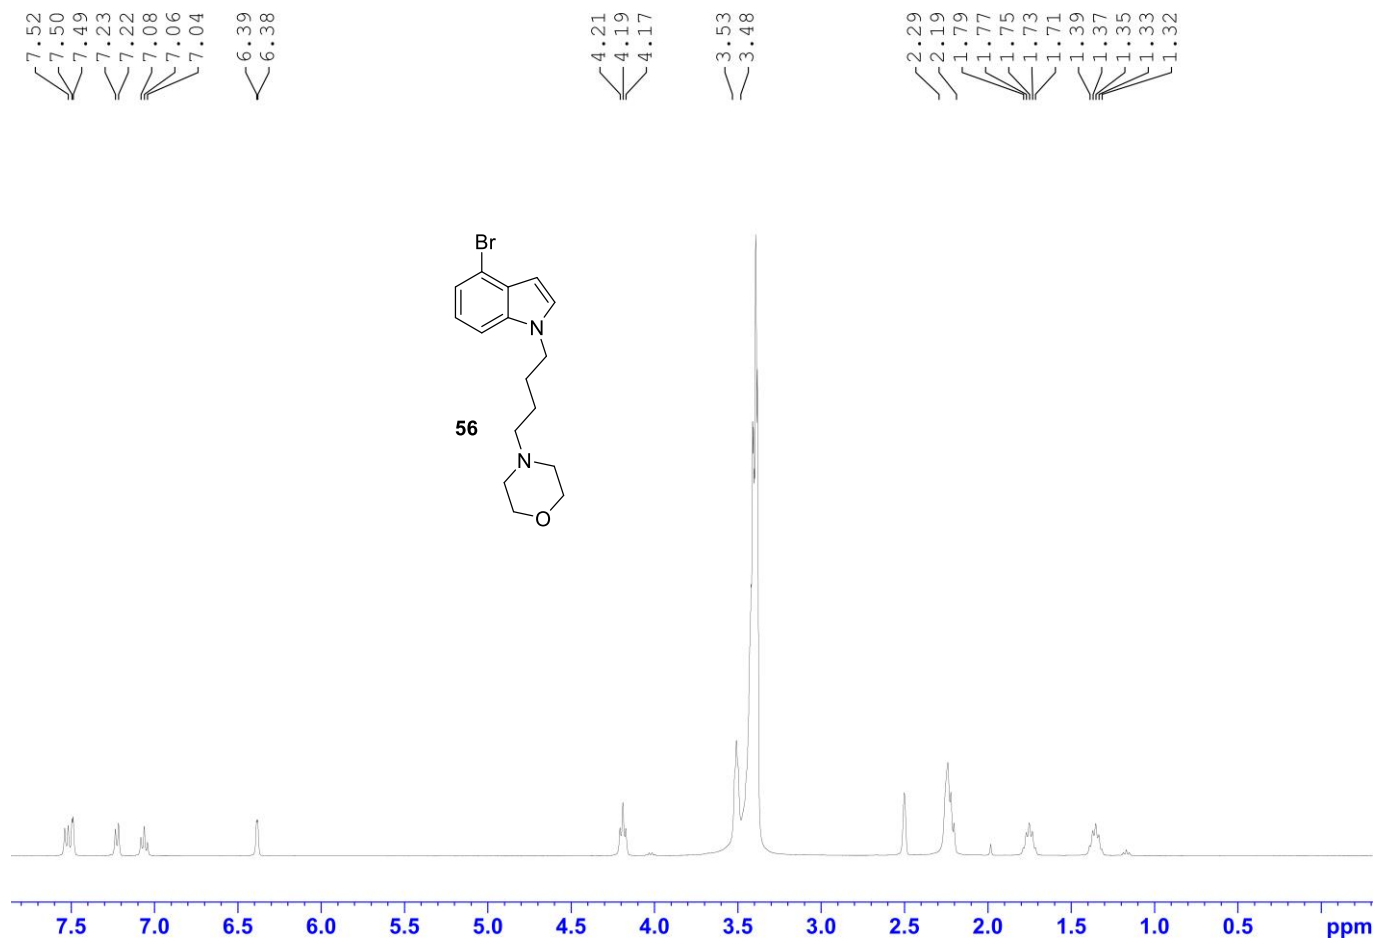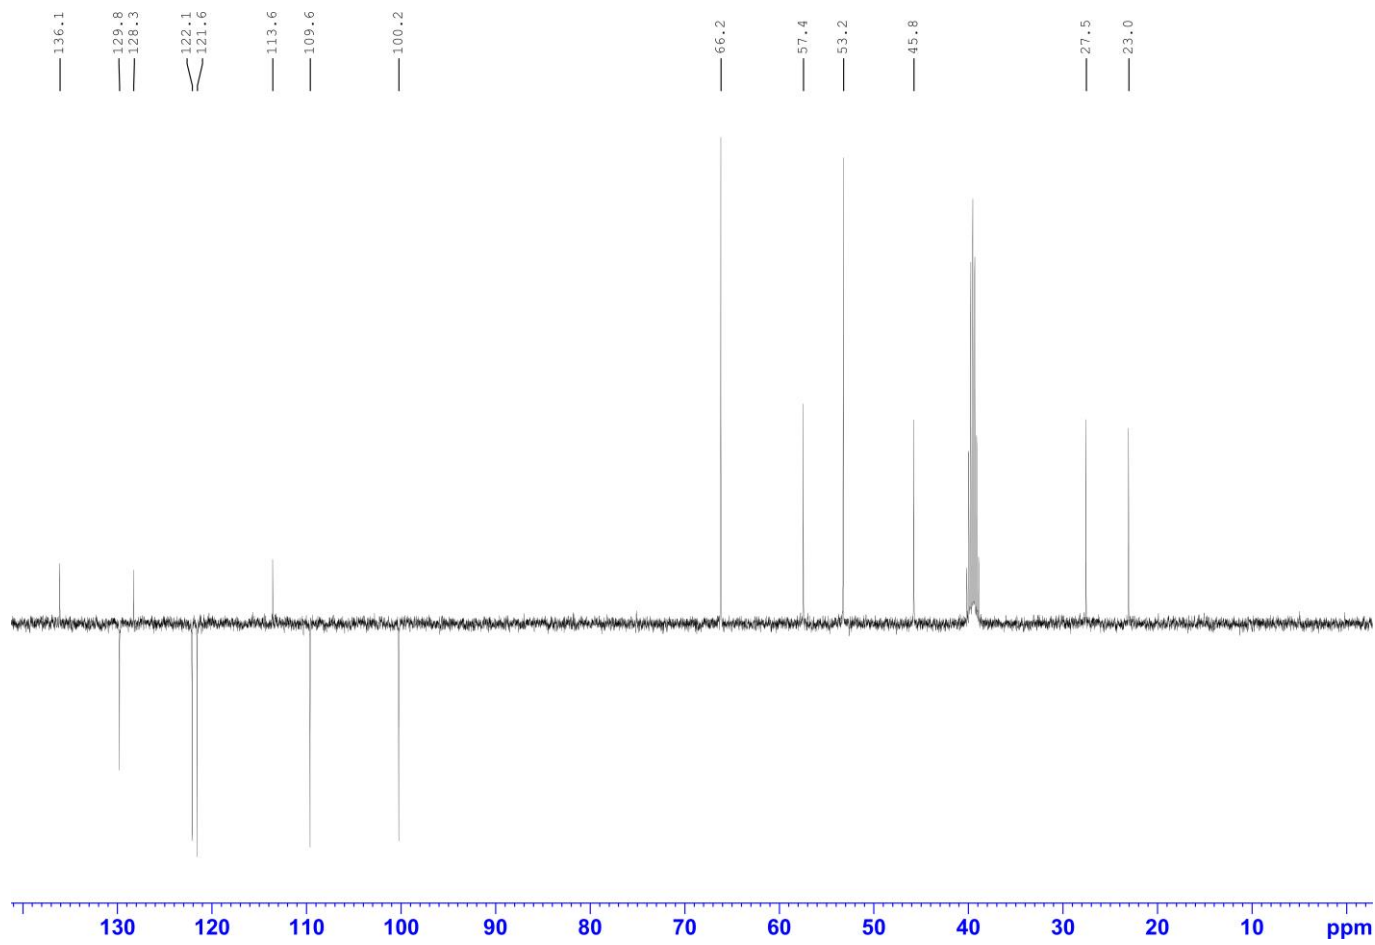

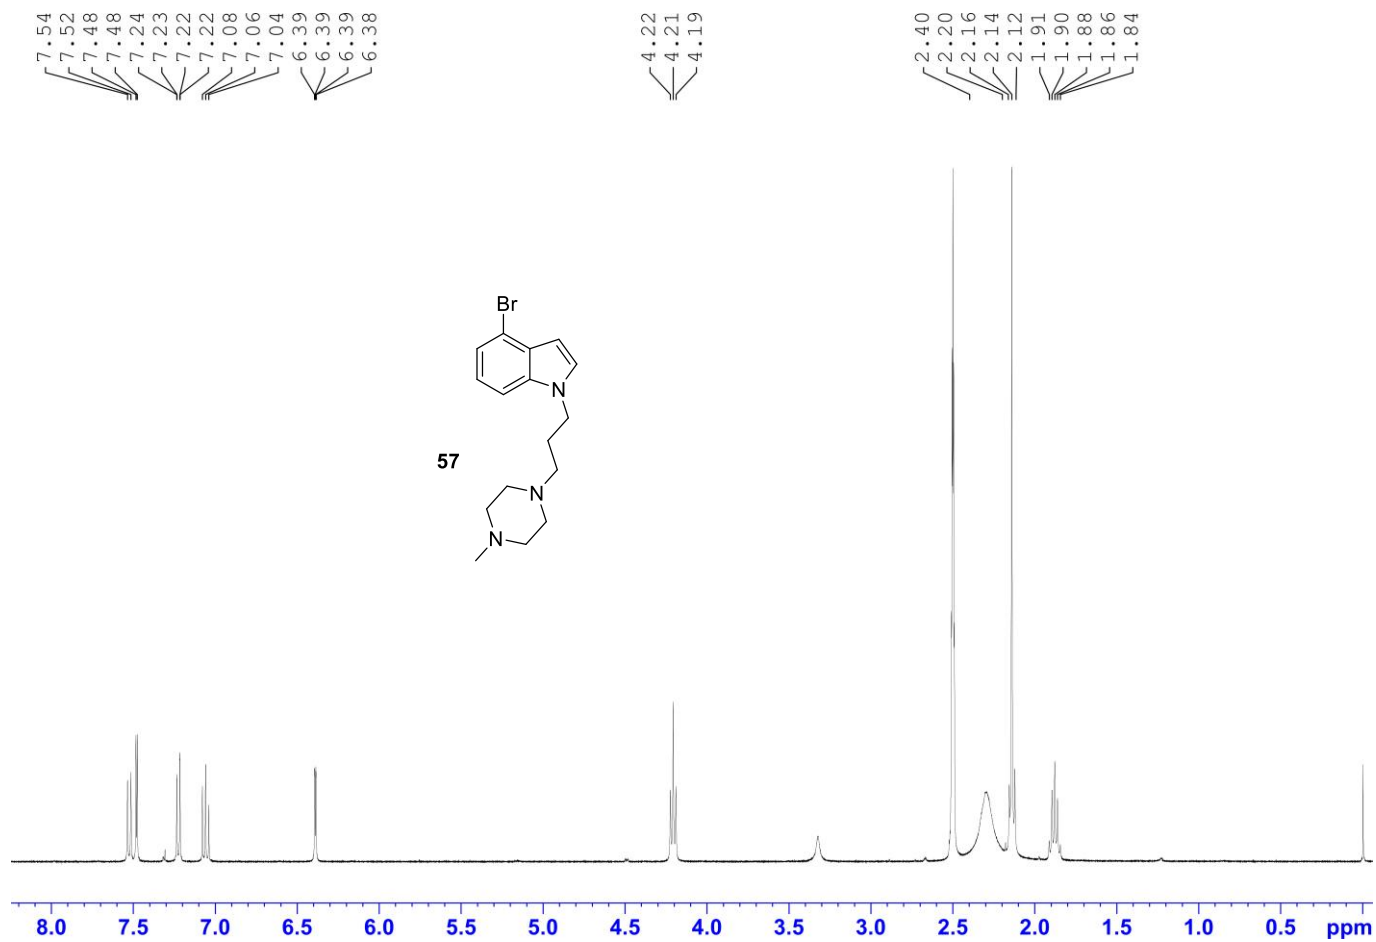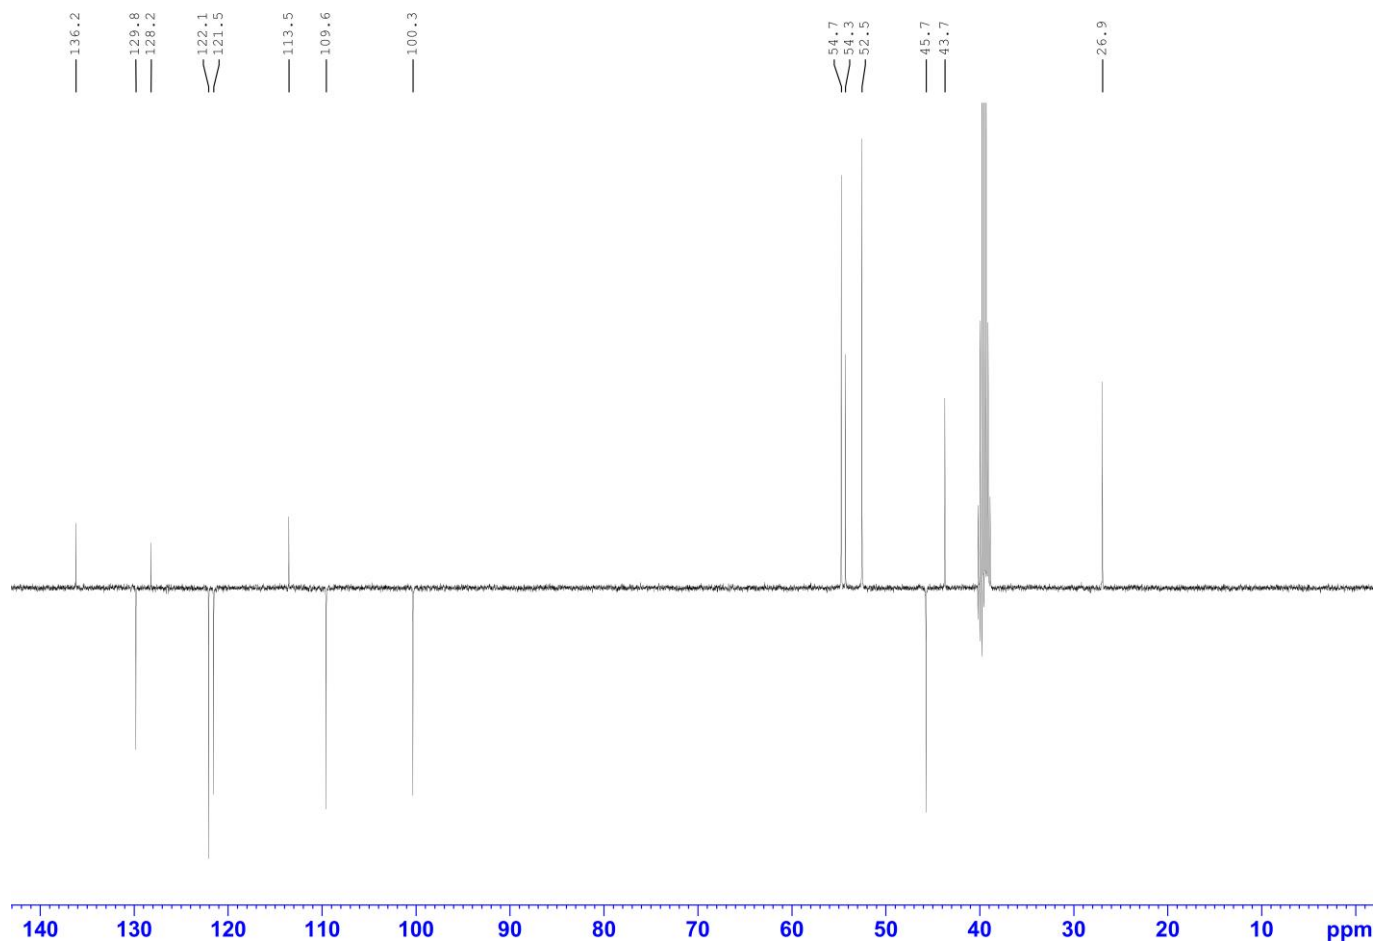

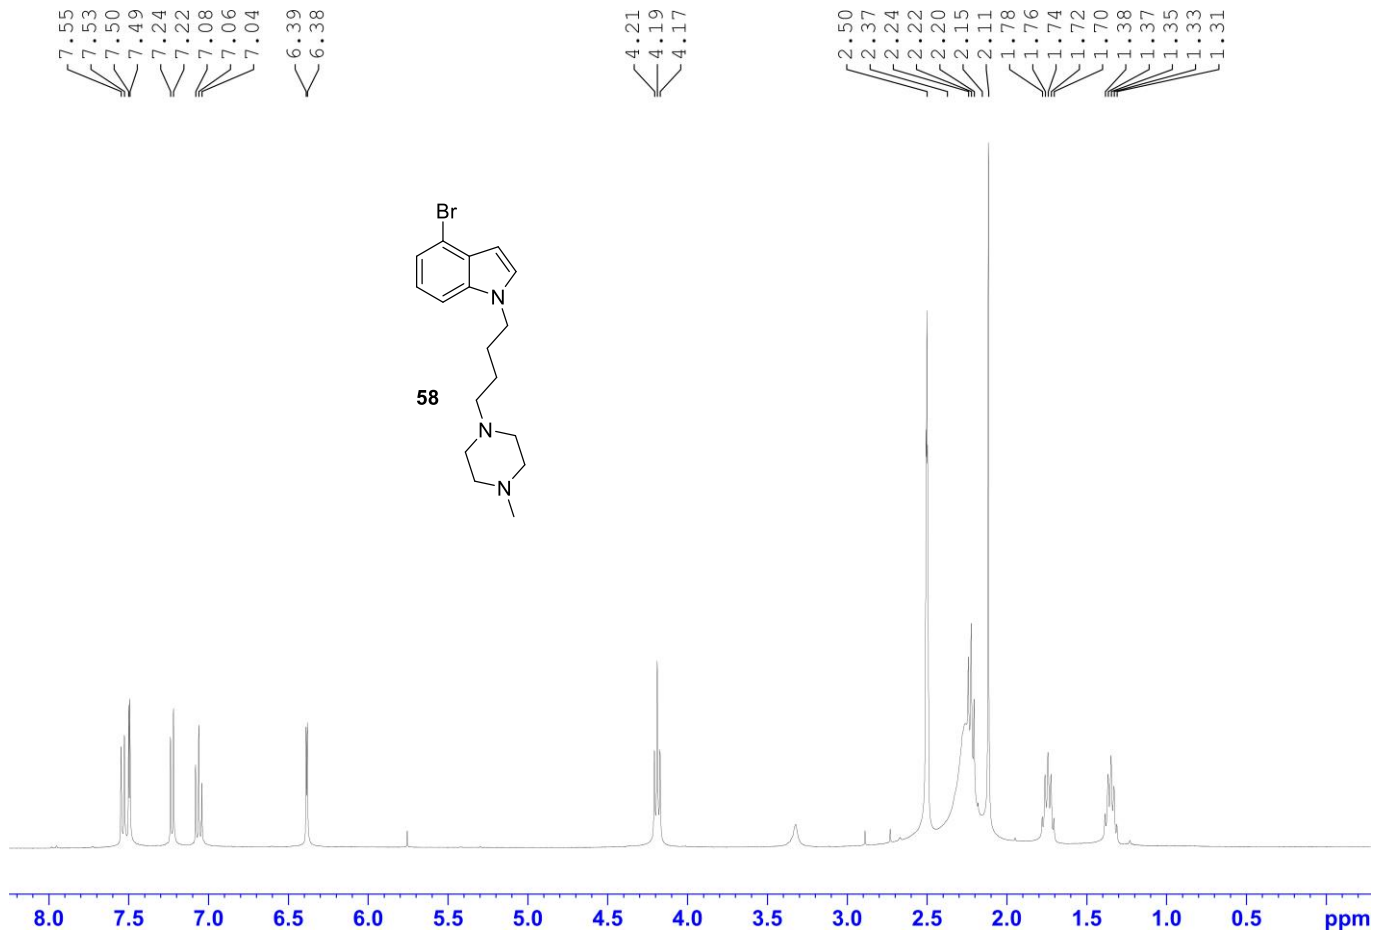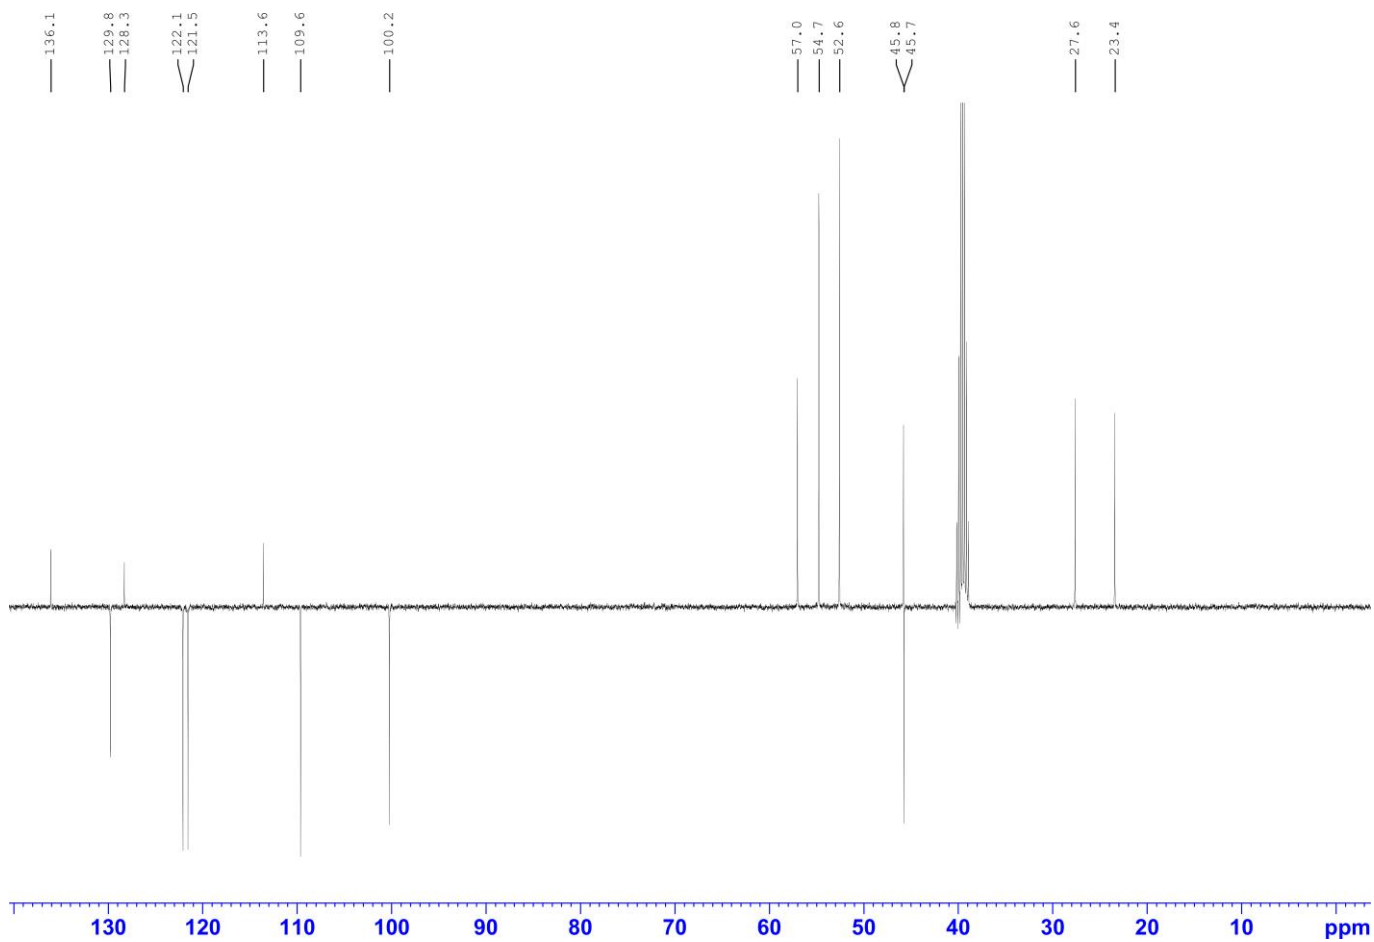



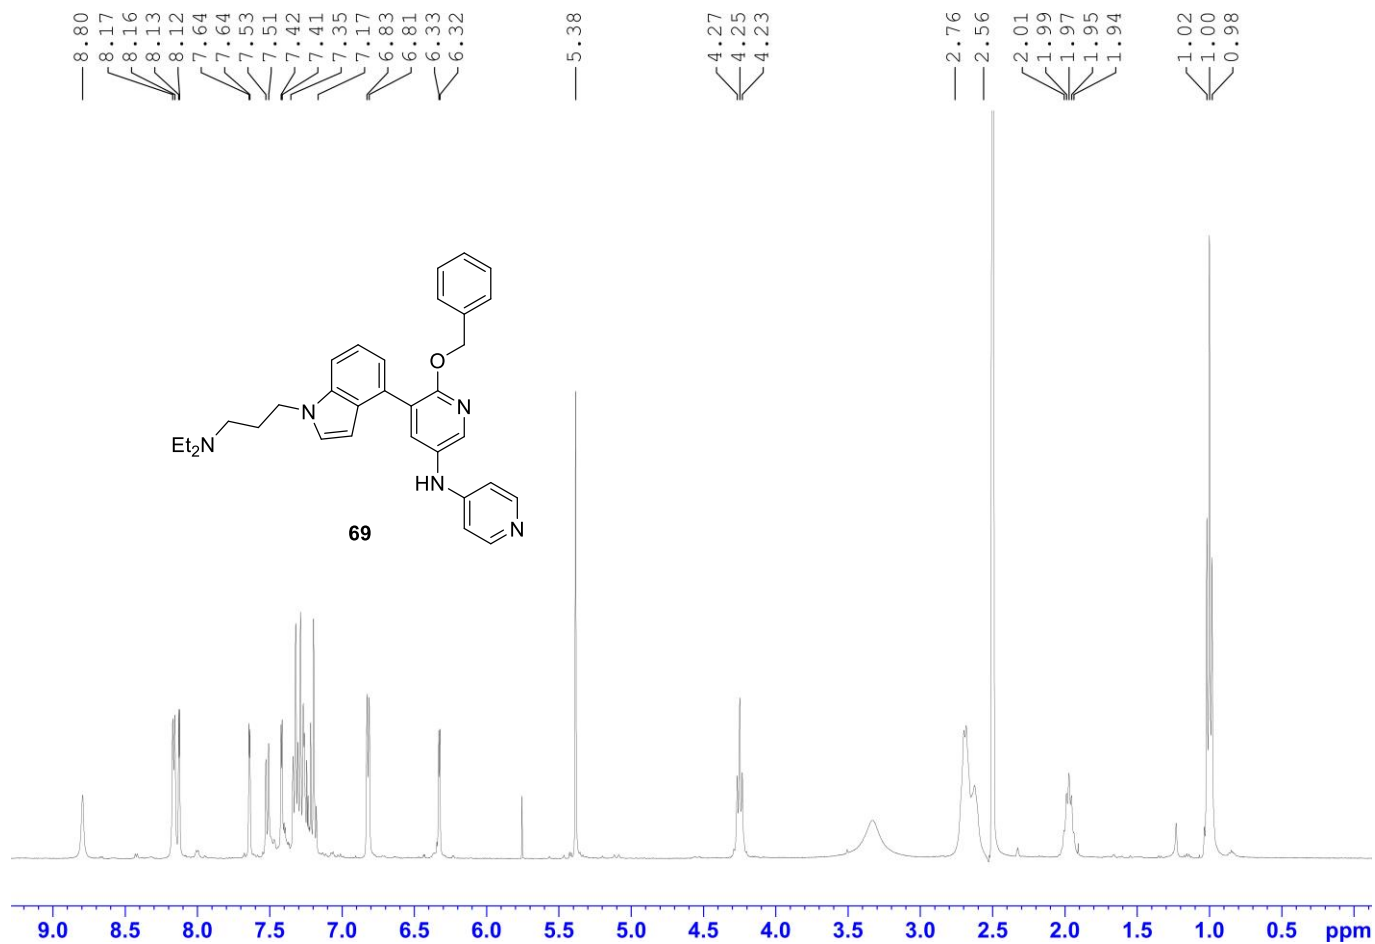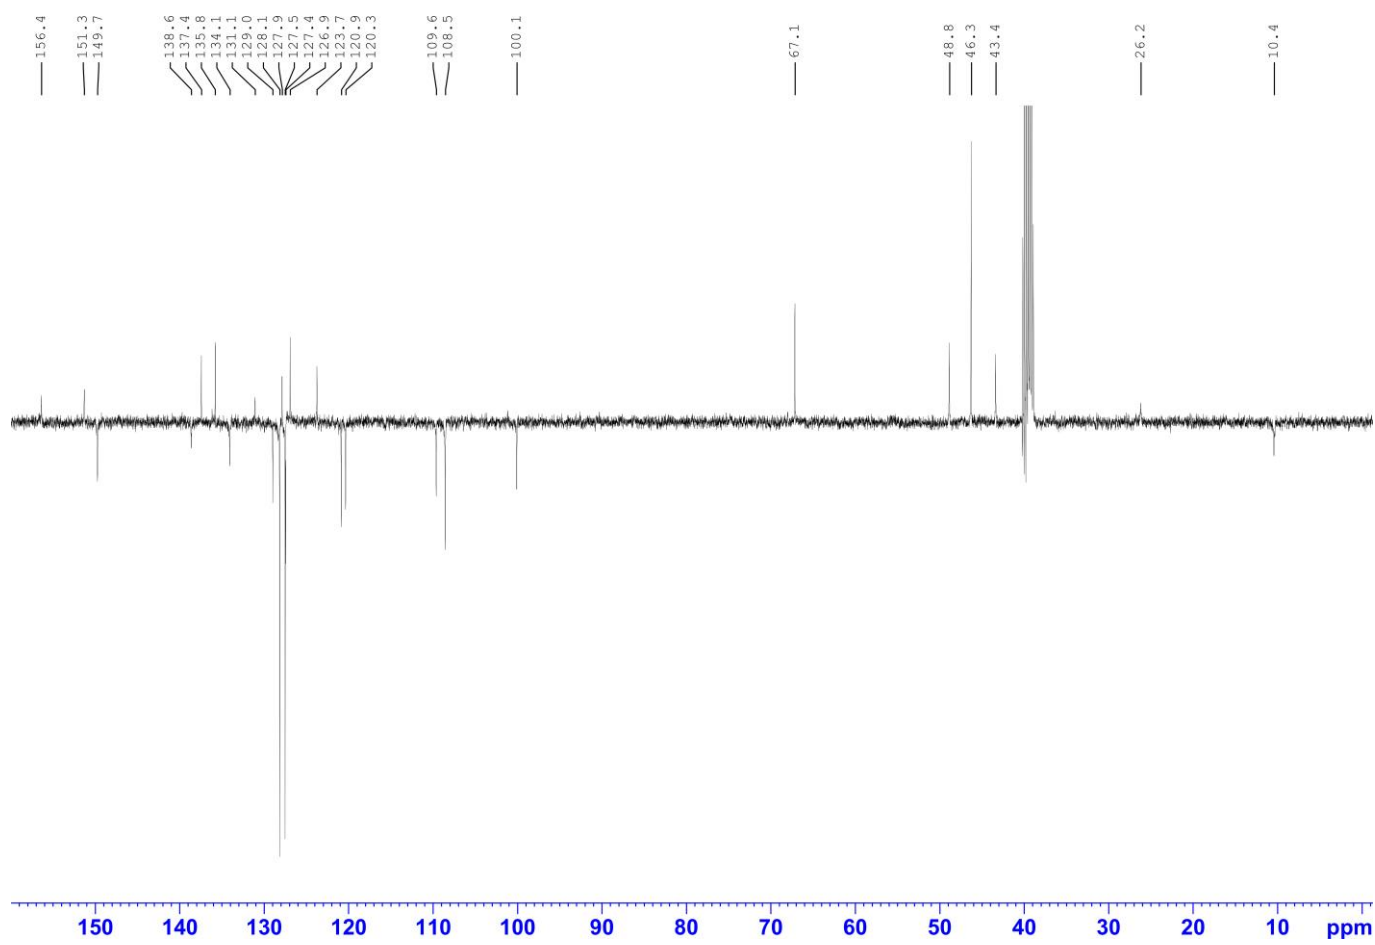

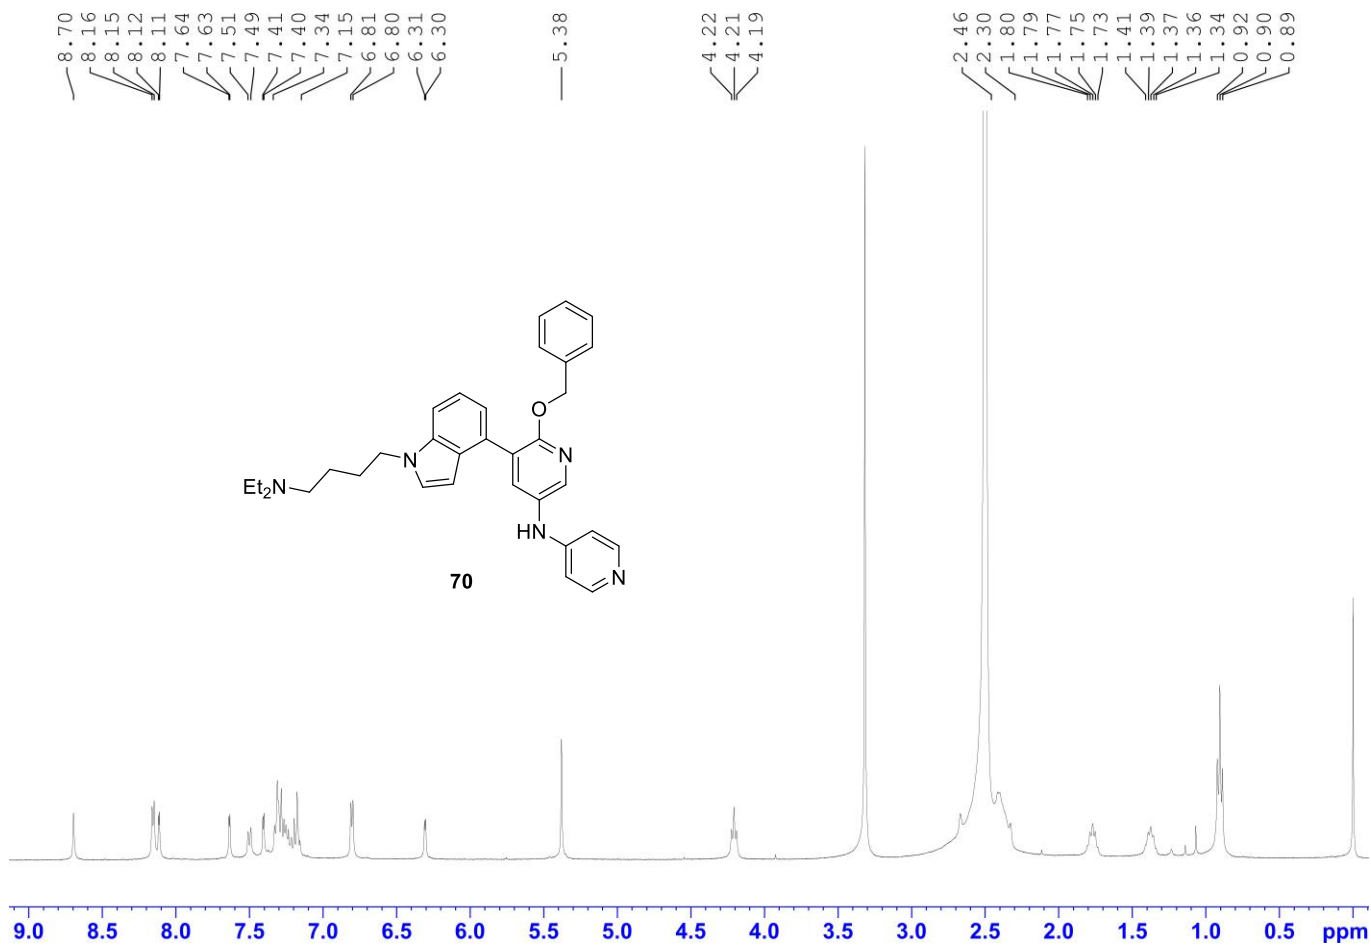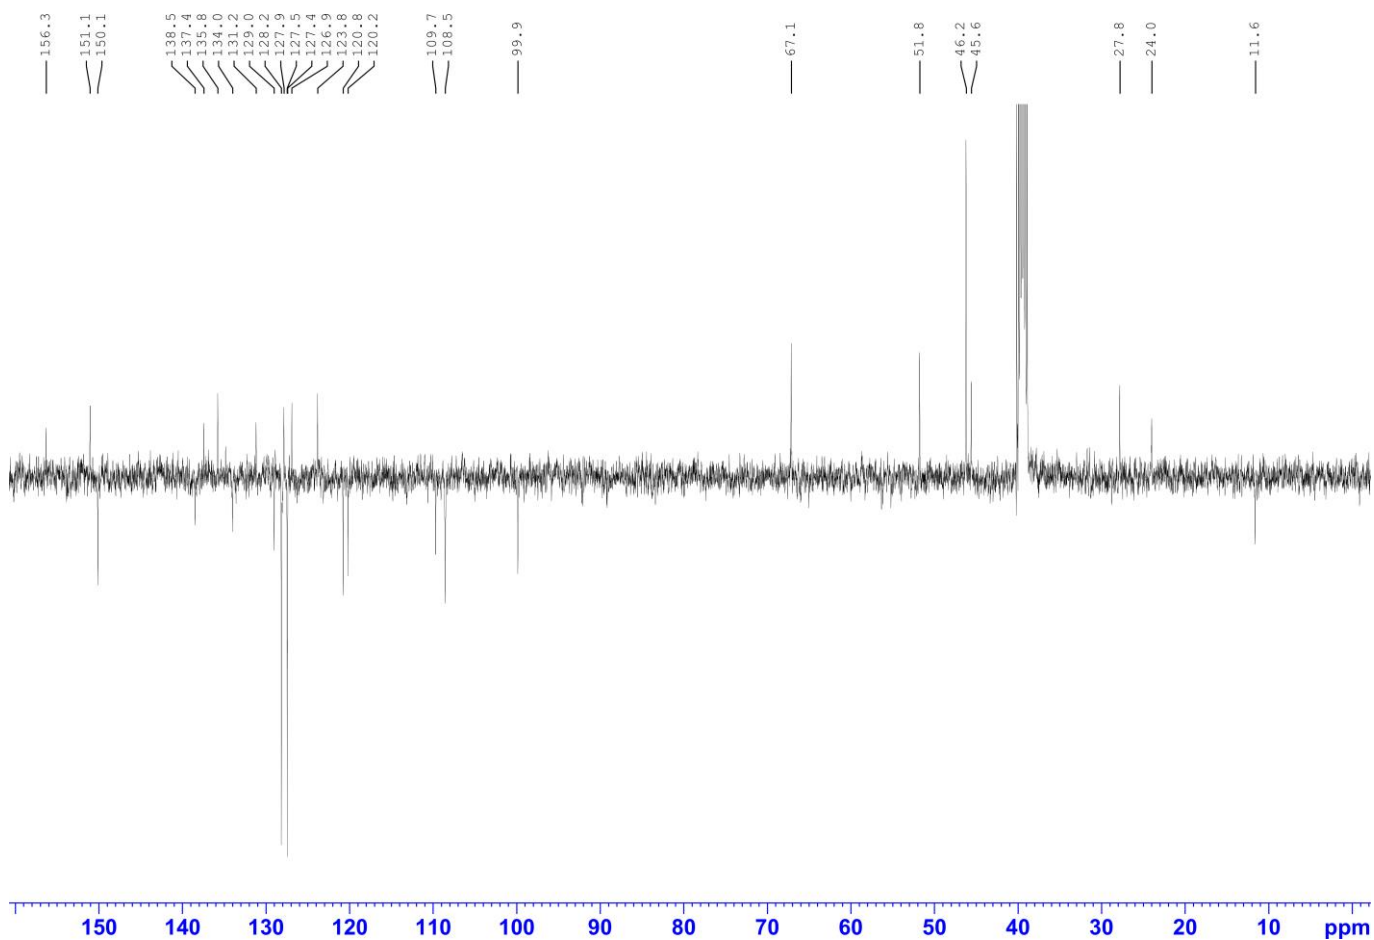

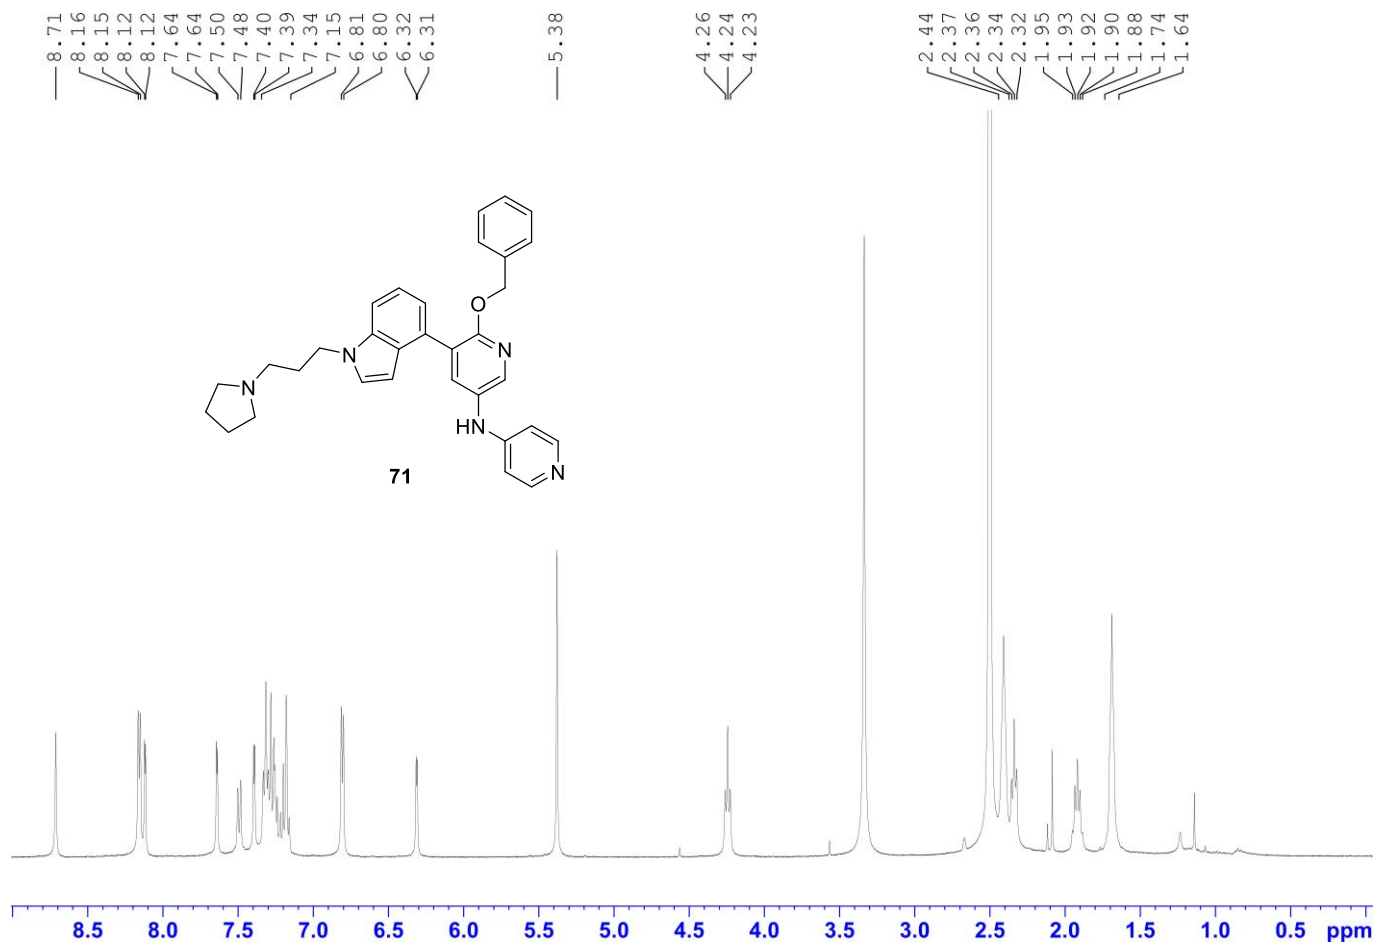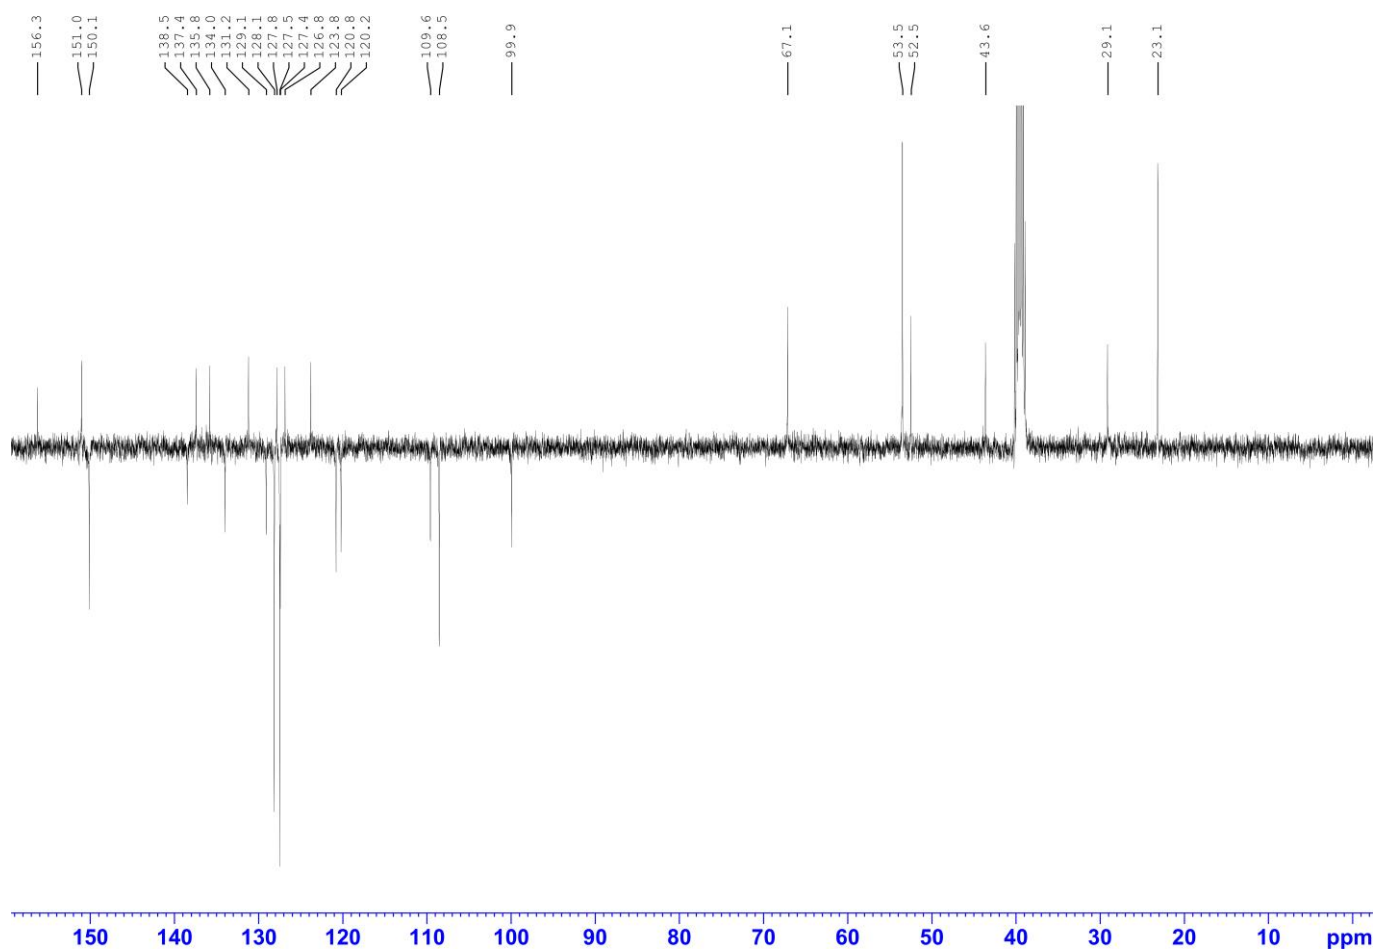

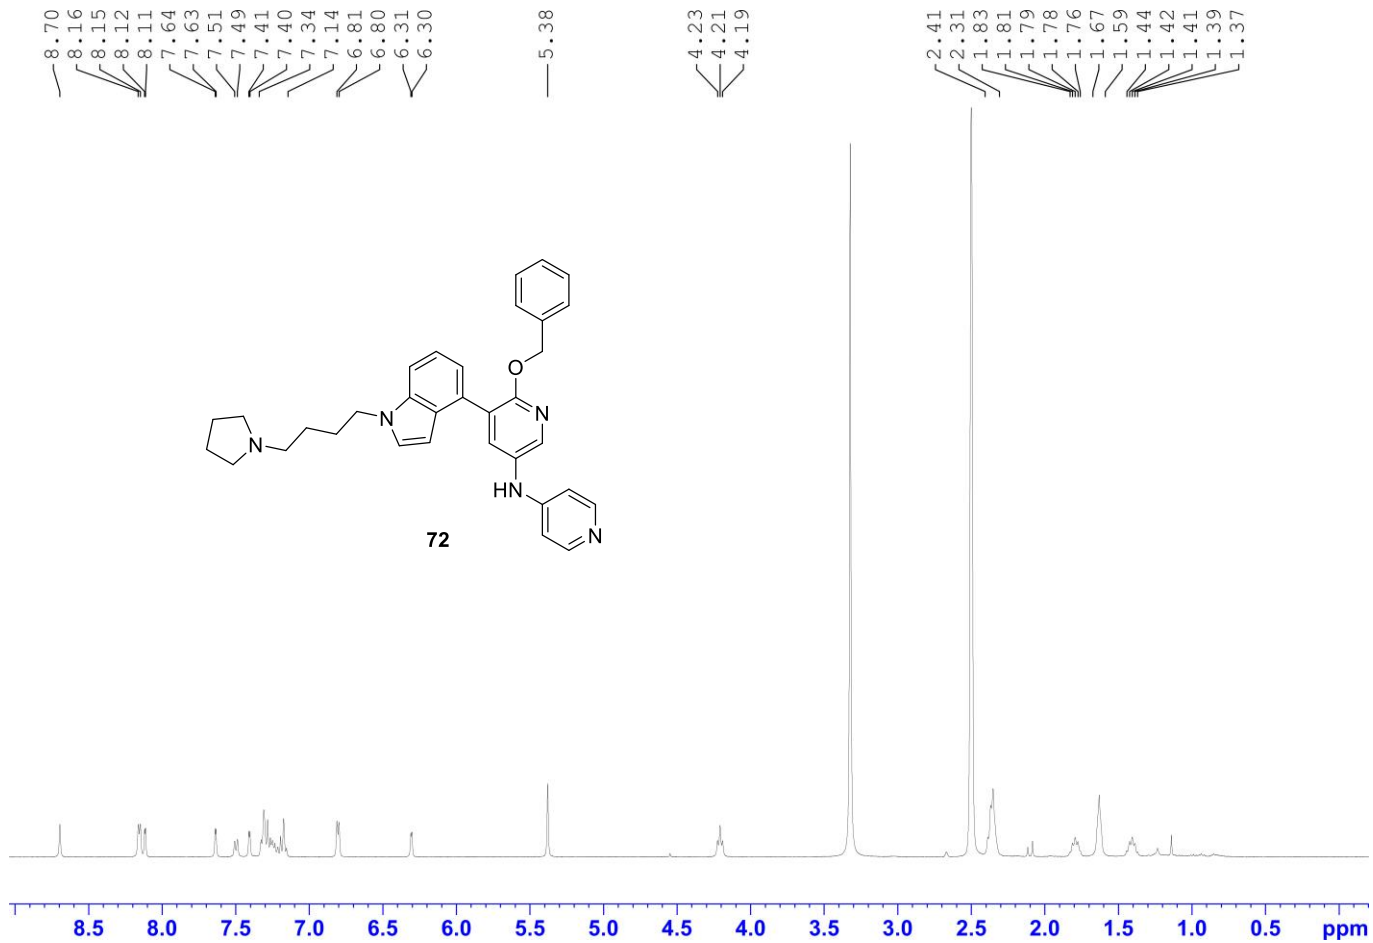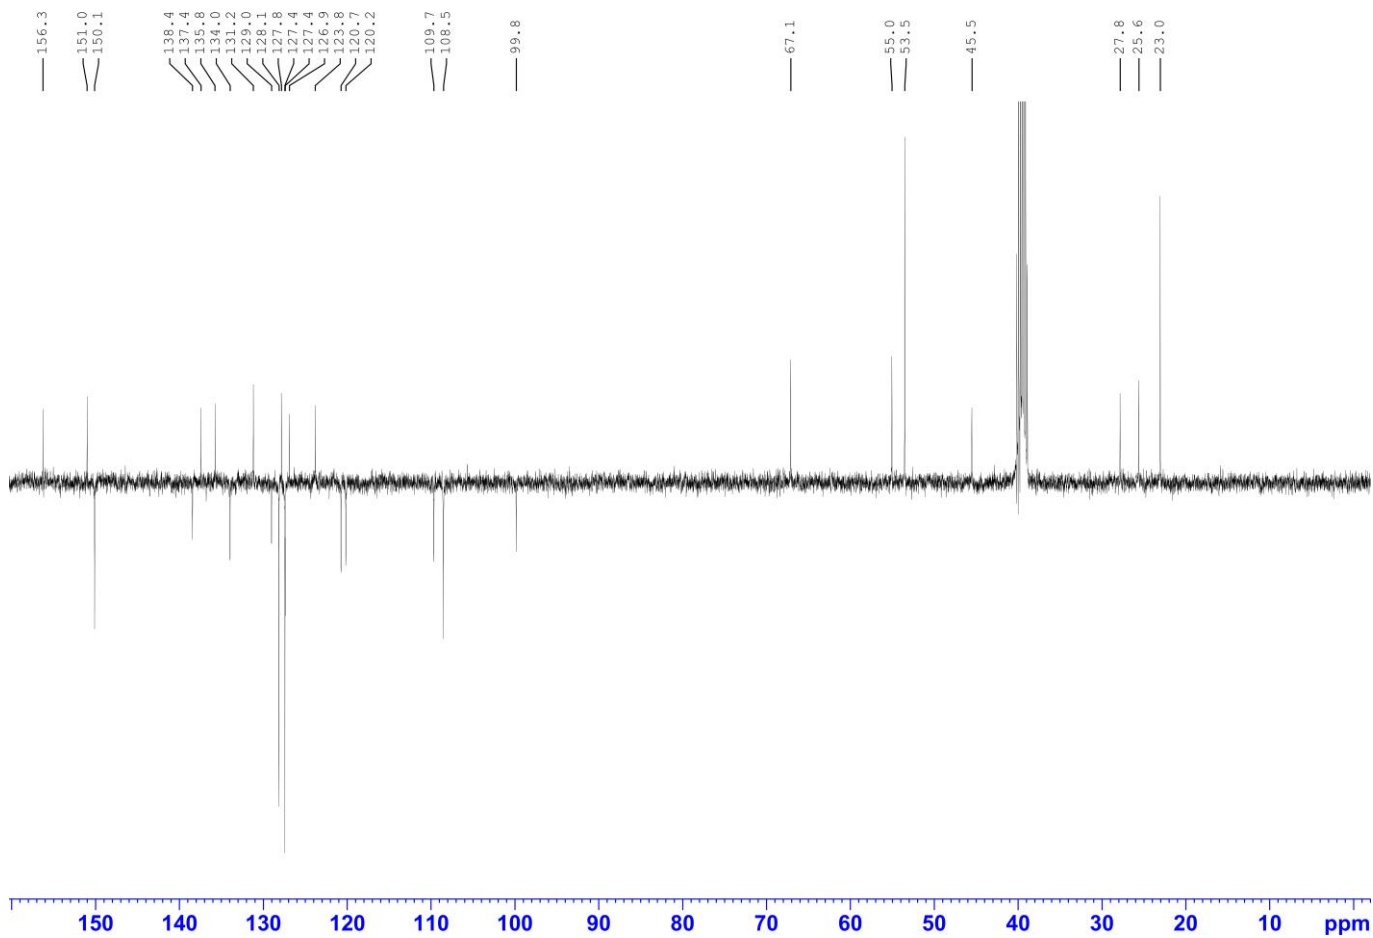

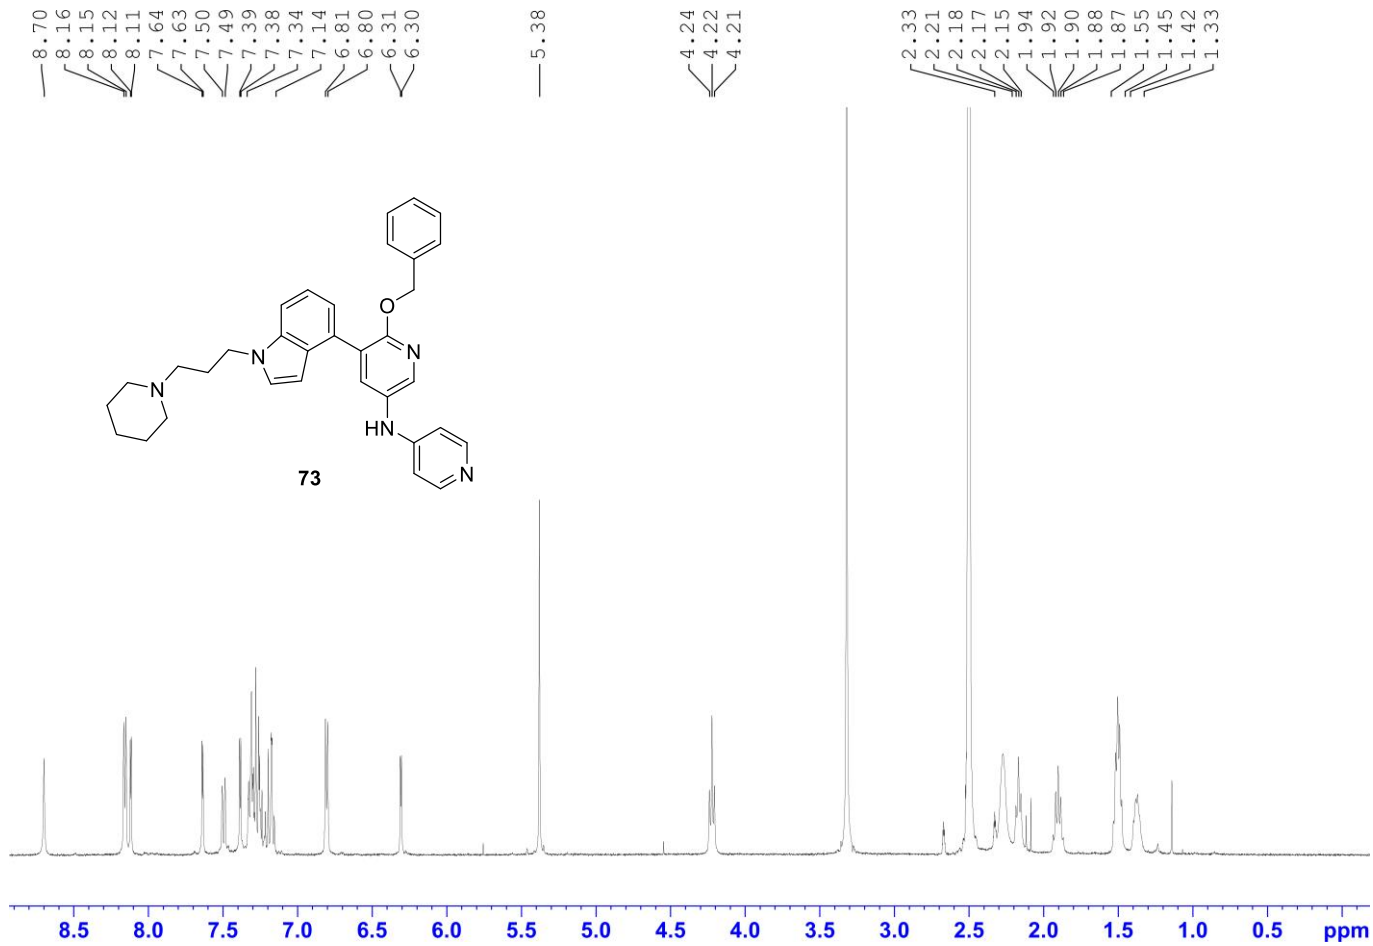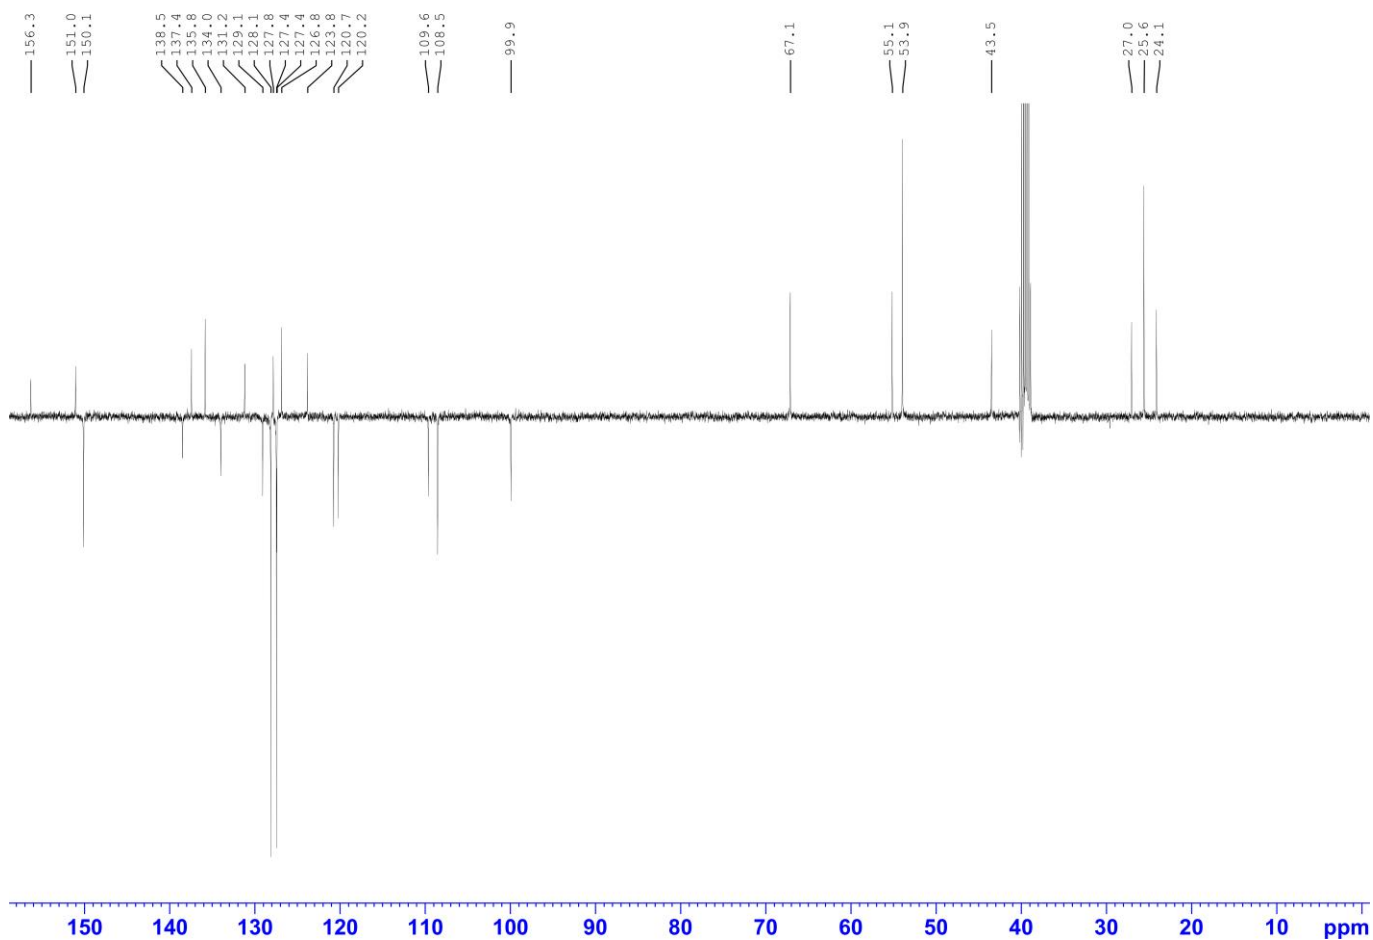

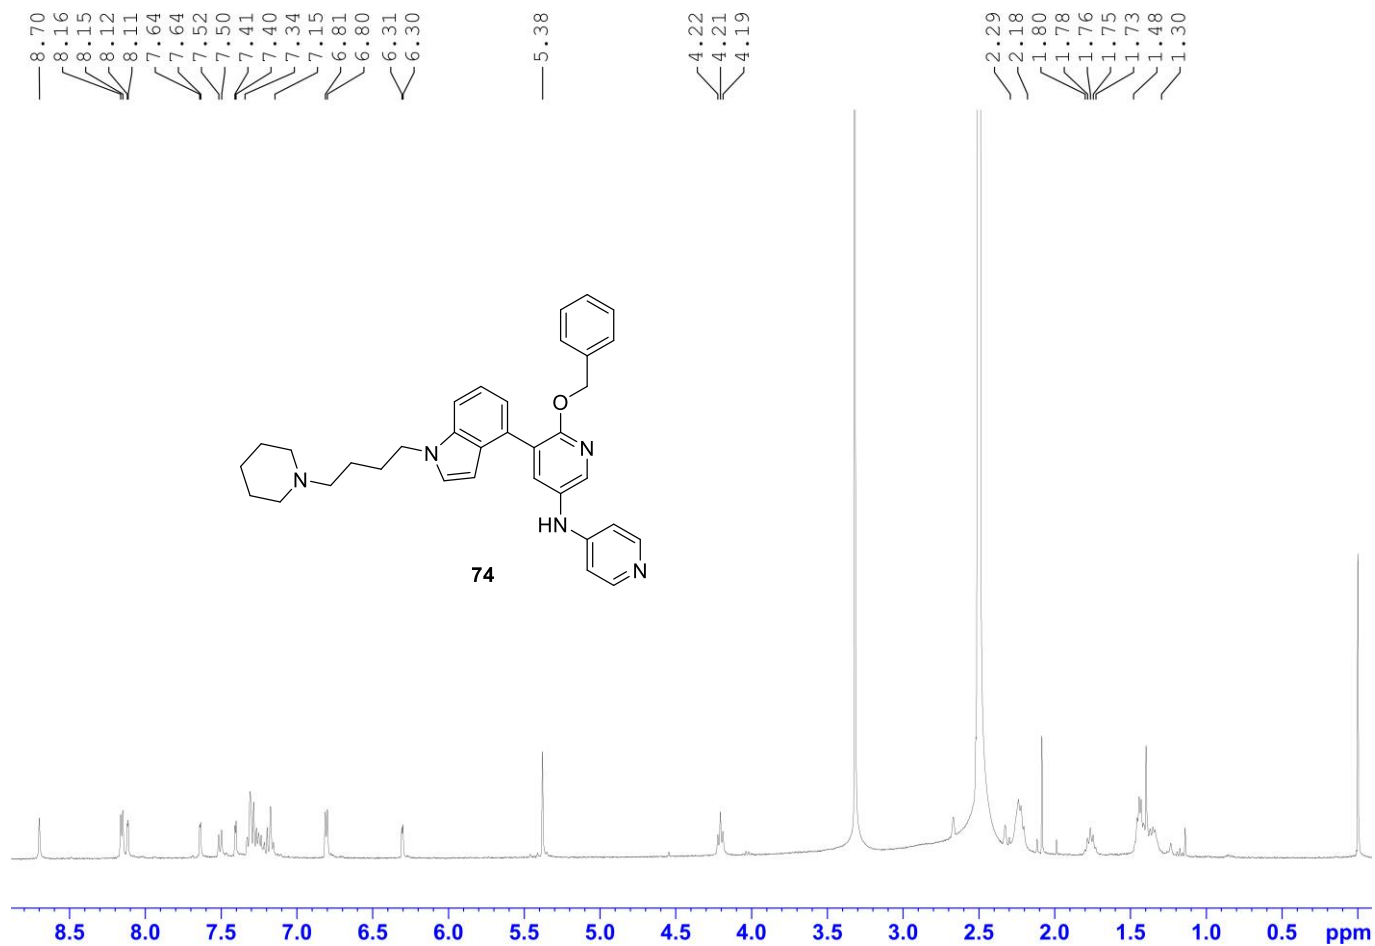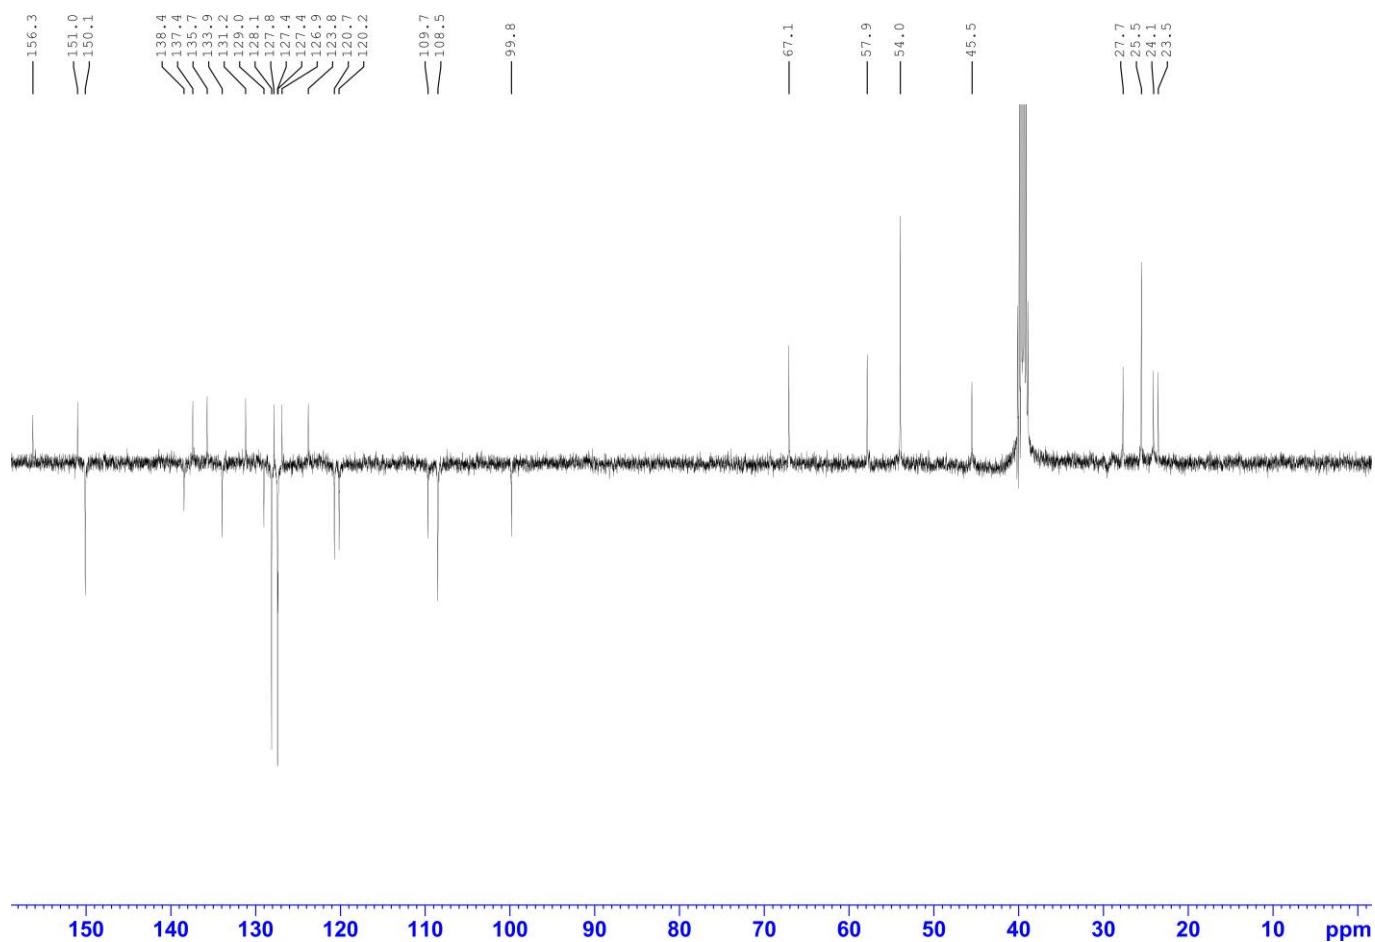

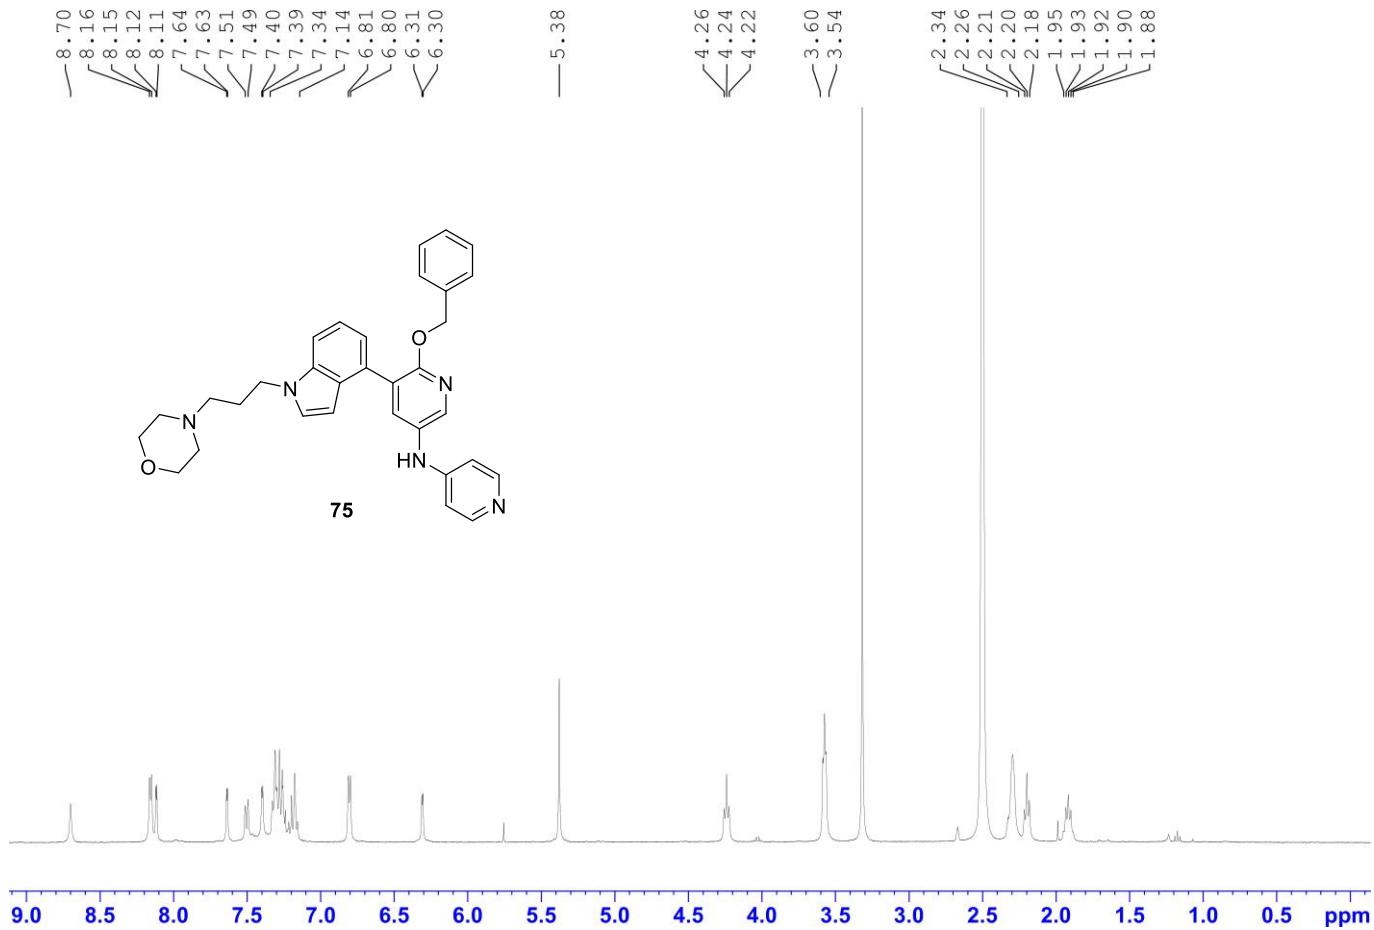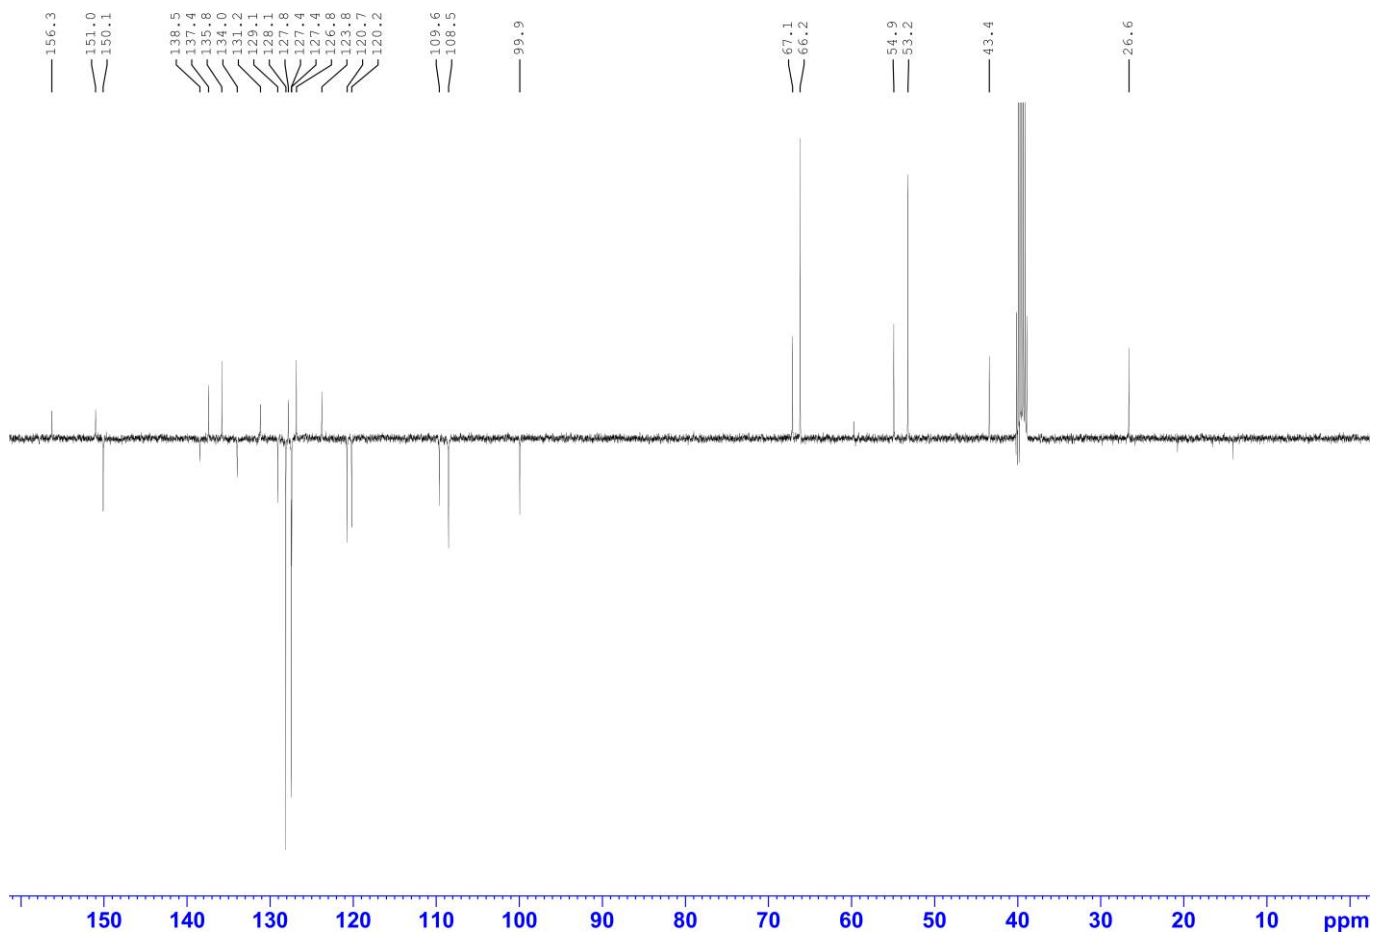

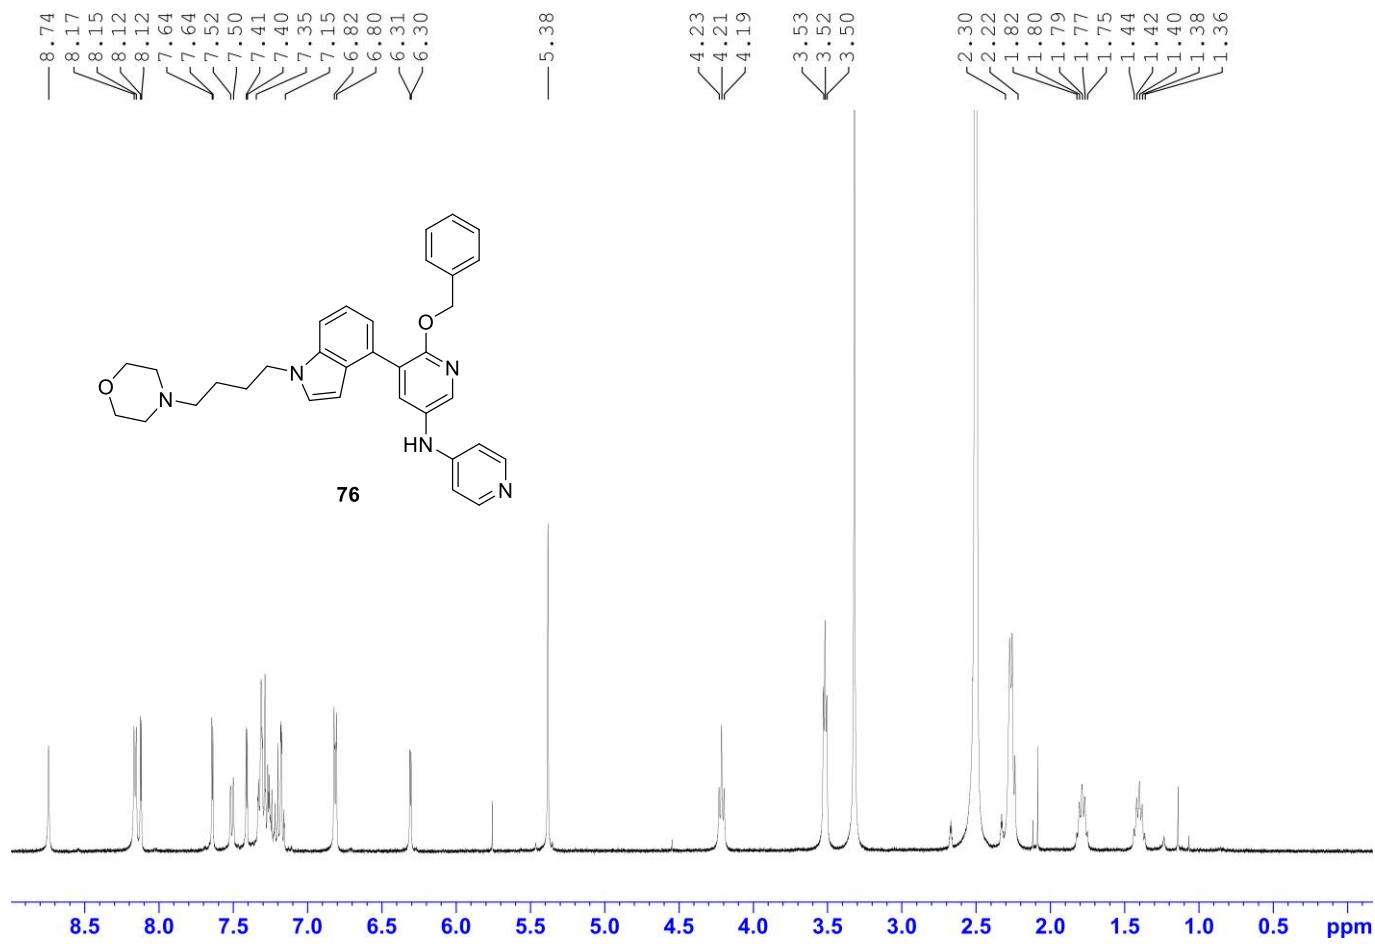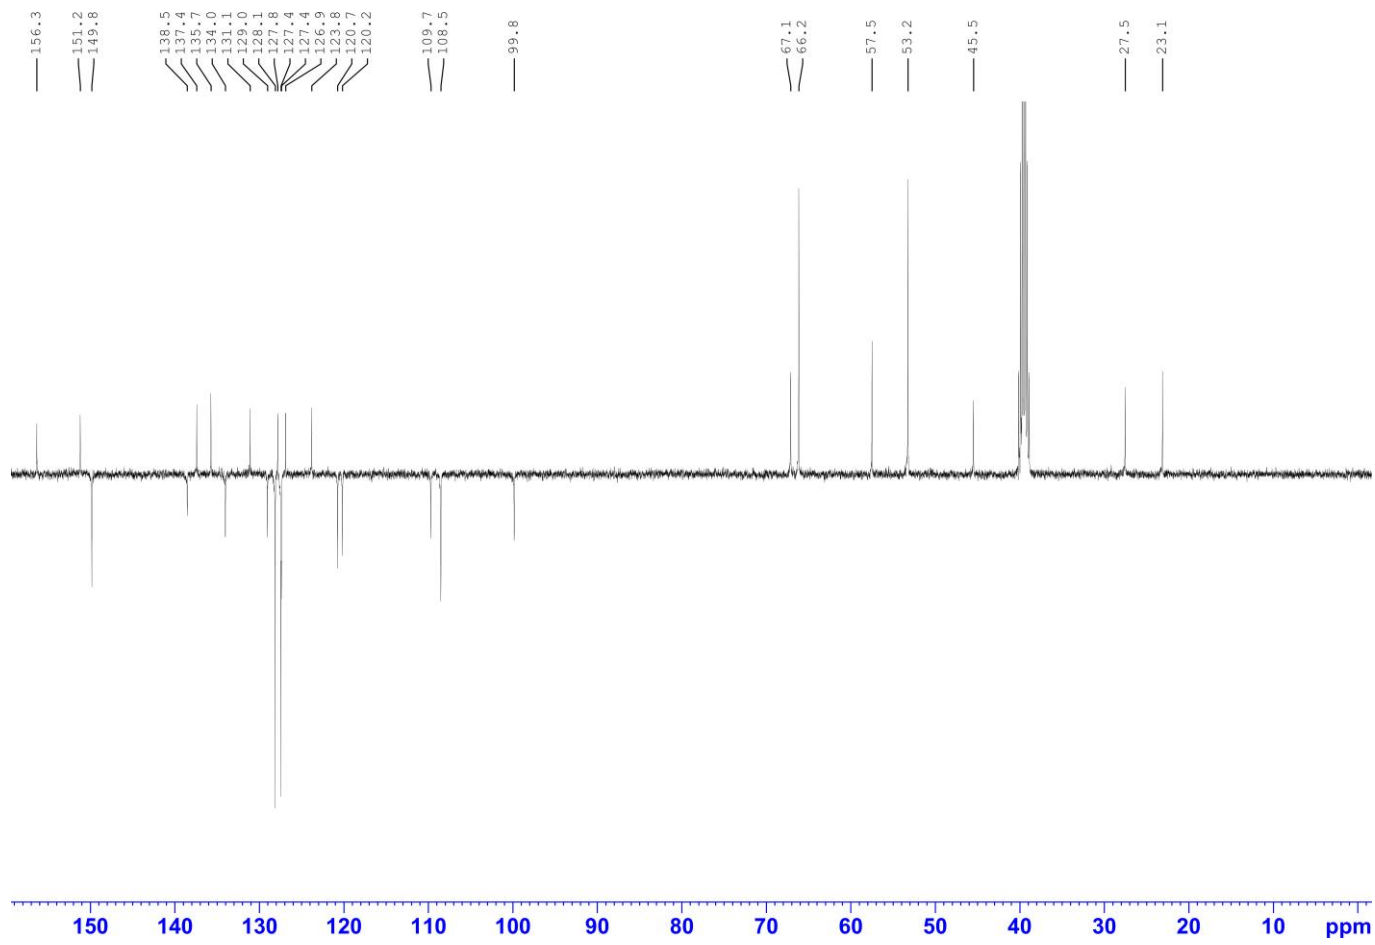



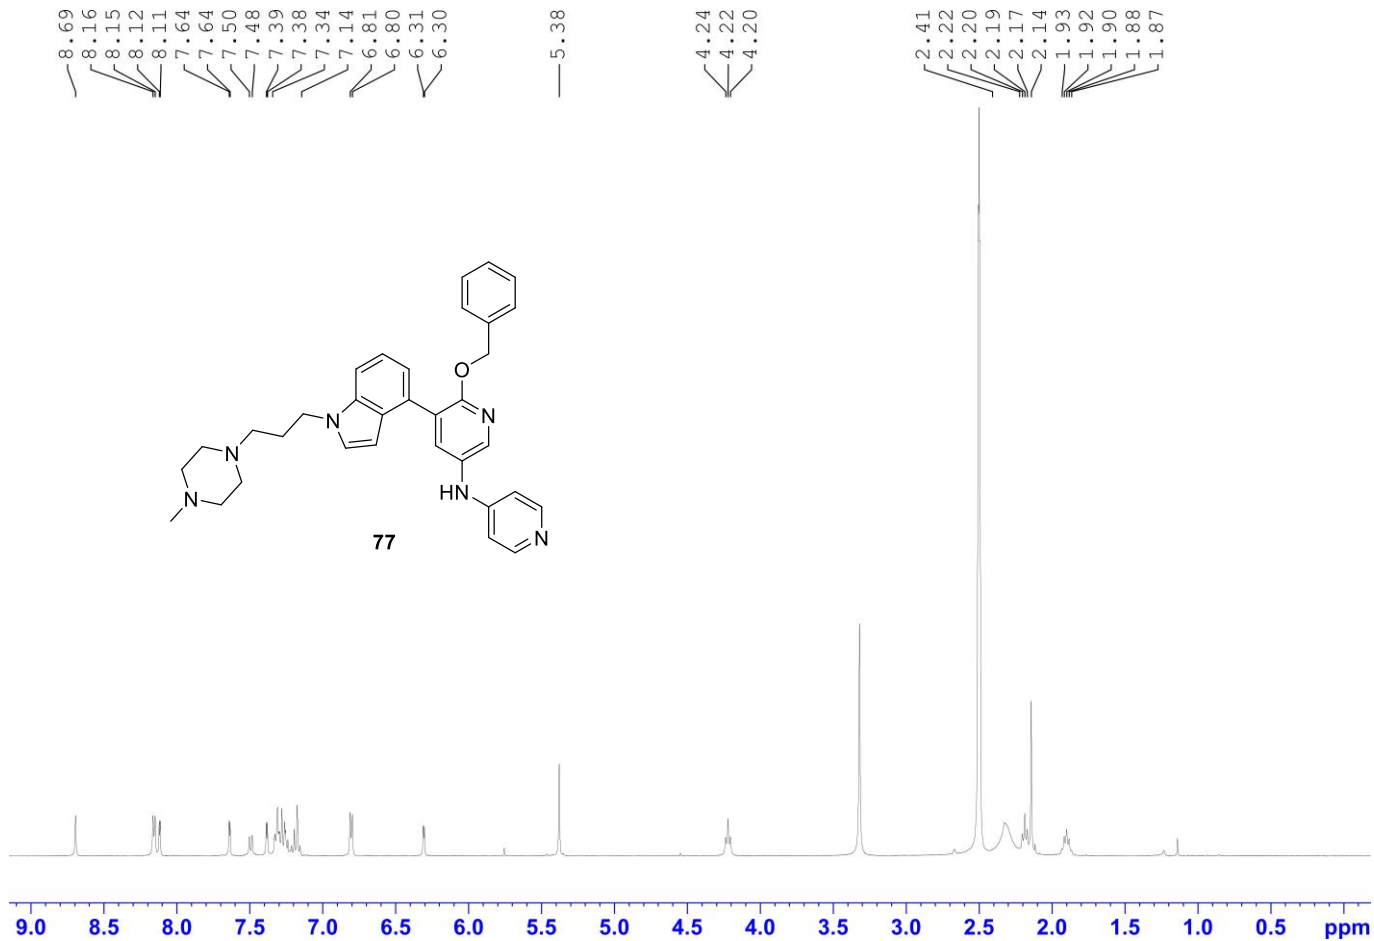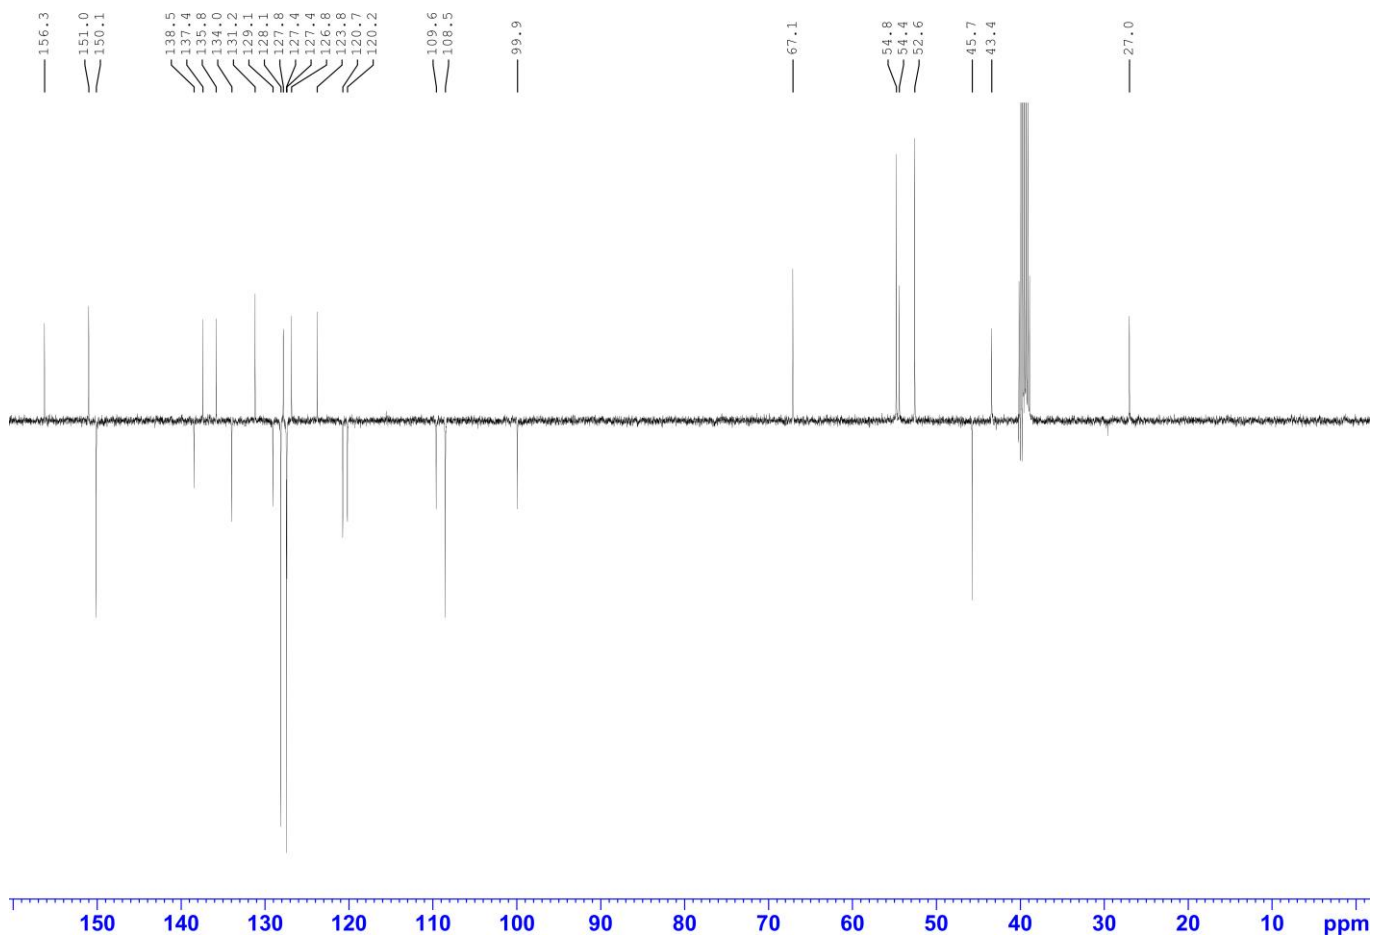

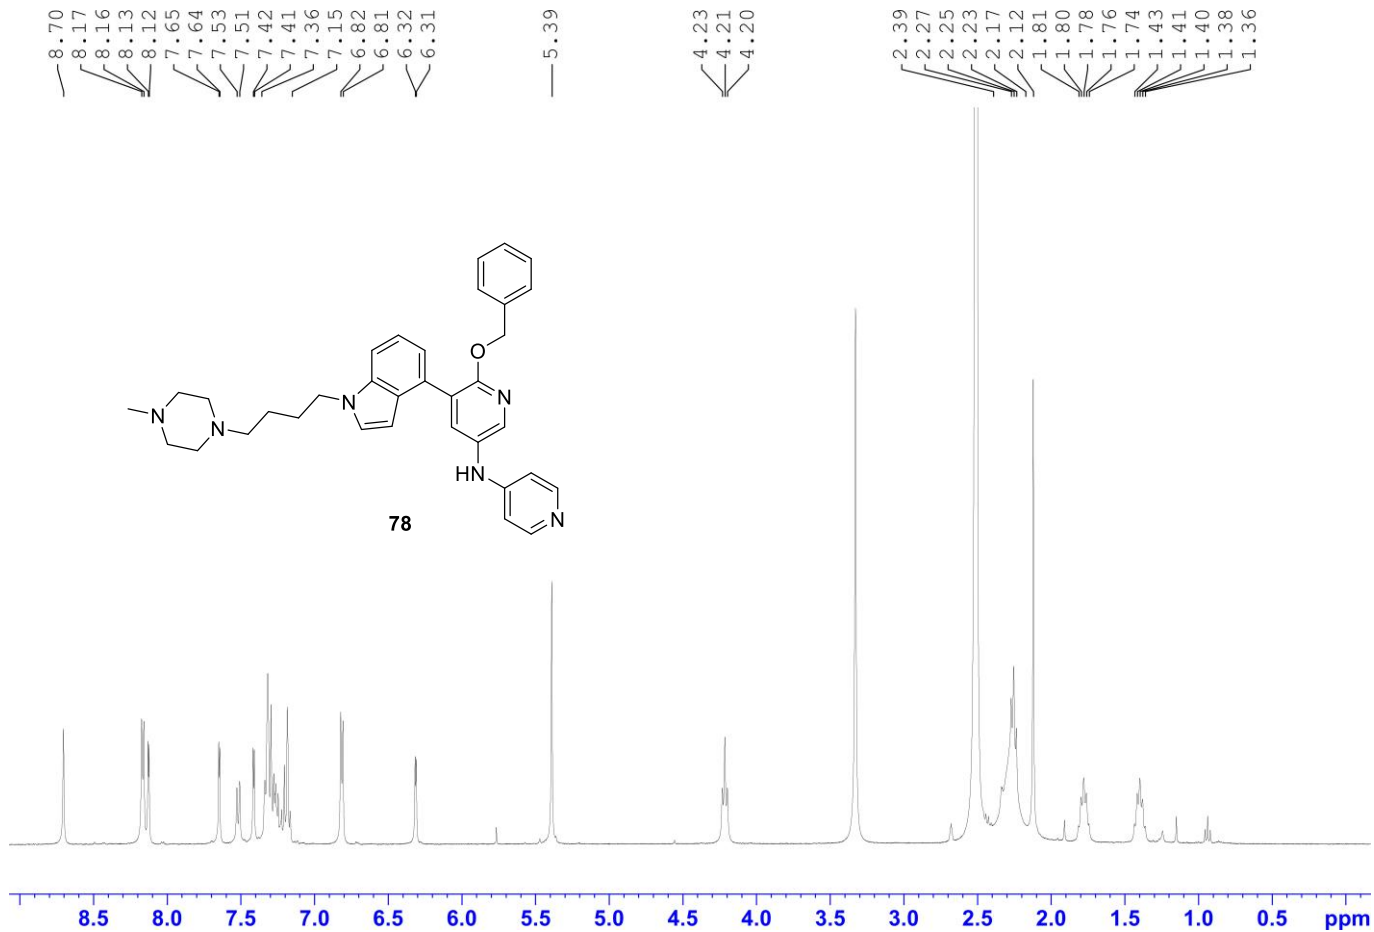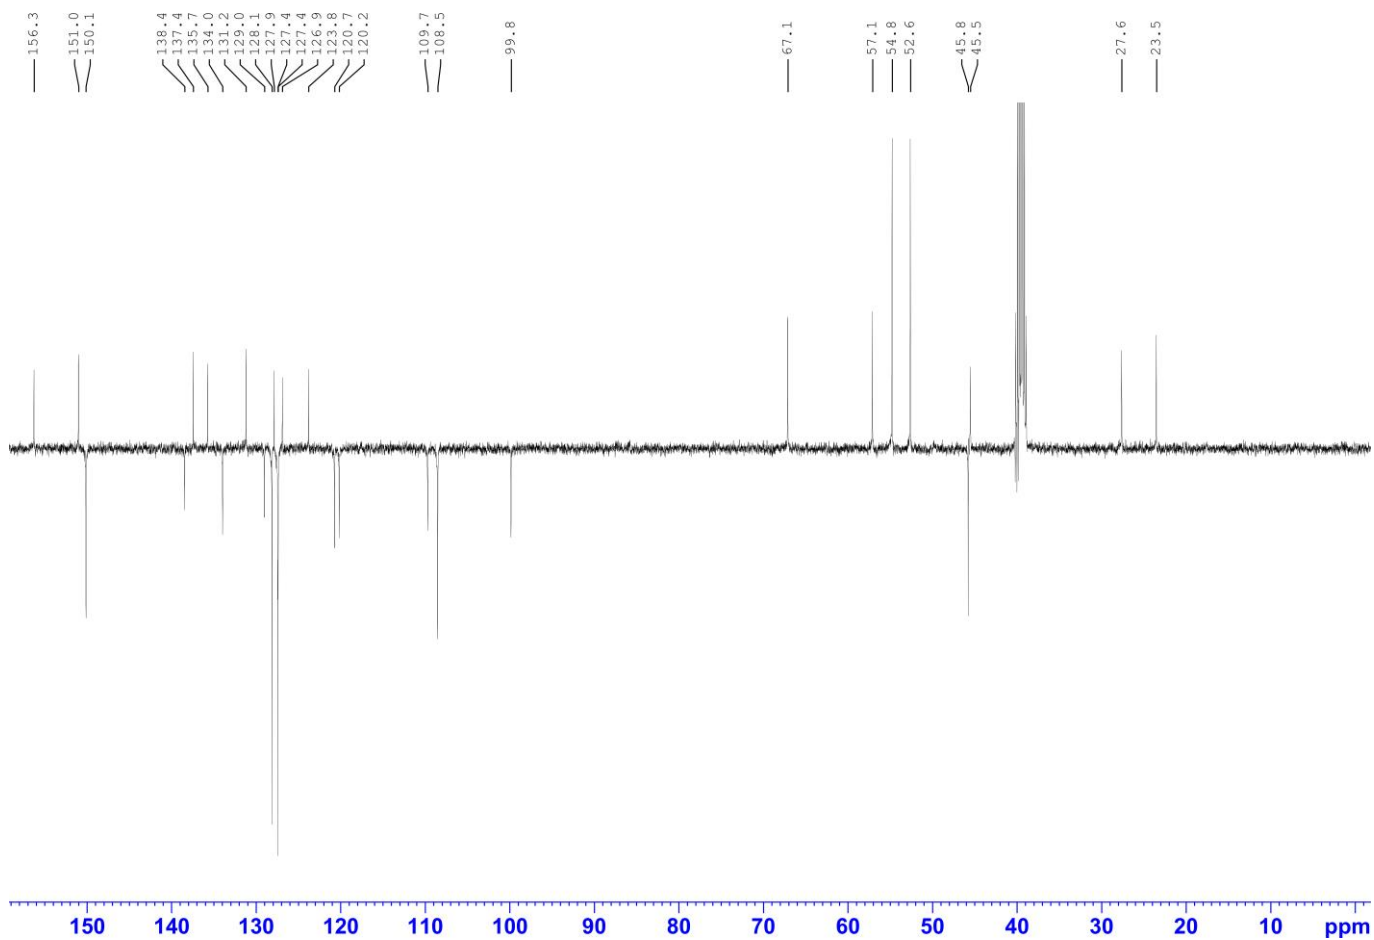

—11.70

8.22  
8.12  
8.12  
8.11  
8.11  
7.49  
7.48  
7.45  
7.43  
7.37  
7.37  
7.34  
7.33  
7.29  
7.27  
7.17  
7.15  
7.13  
6.64  
6.64  
6.63  
6.63  
6.35  
6.35

4.21  
4.20  
4.18

2.46  
2.44  
2.42  
2.40  
2.36  
2.34  
2.32  
1.89  
1.87  
1.86  
1.84  
0.93  
0.92  
0.90

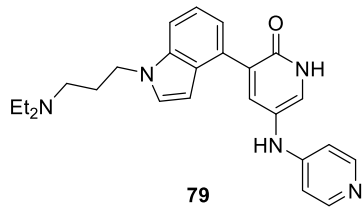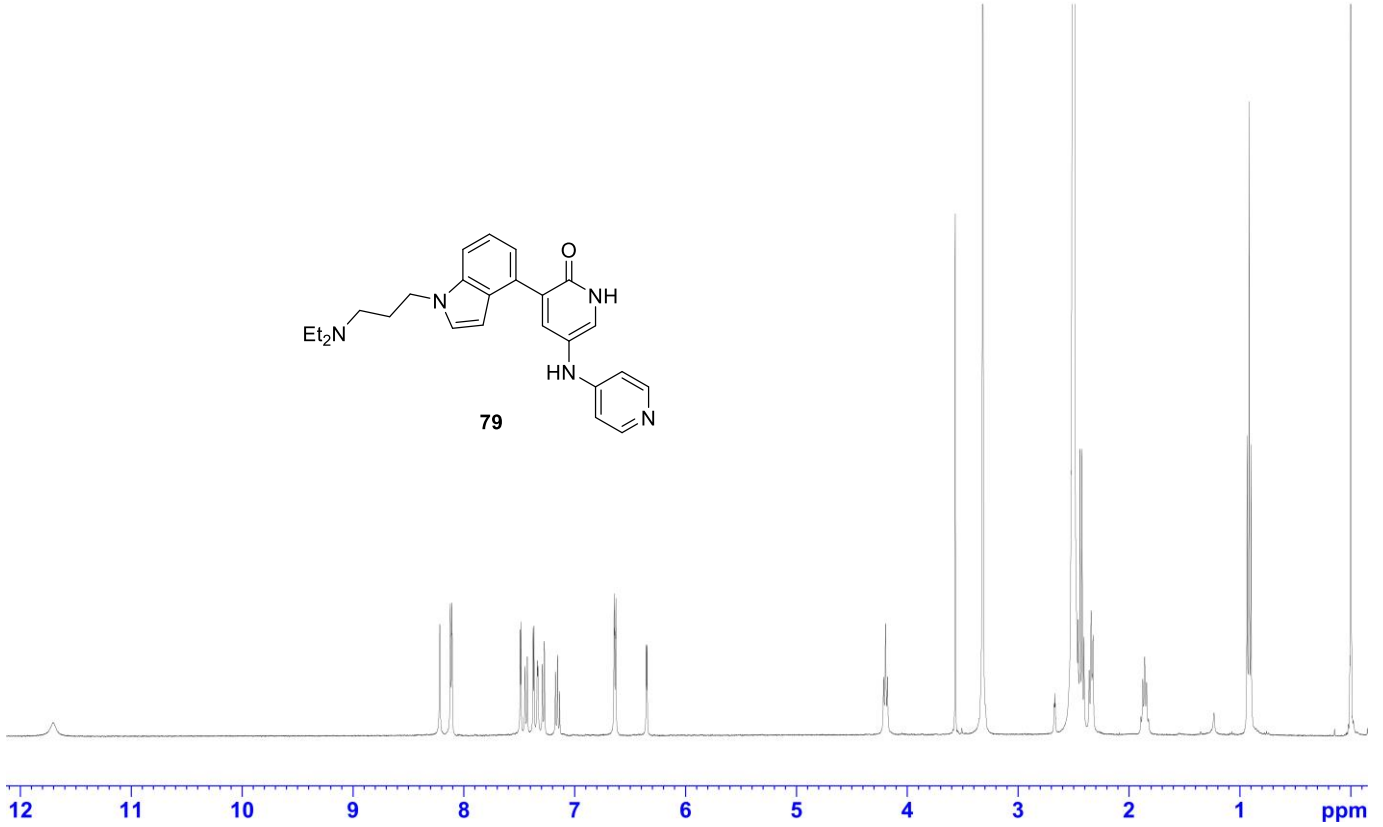

159.9  
152.4  
149.9  
138.7  
135.9  
130.6  
129.5  
128.8  
128.4  
126.5  
120.5  
120.0  
119.5

109.3  
108.1

99.8

49.4  
46.1  
43.7

27.5

11.6

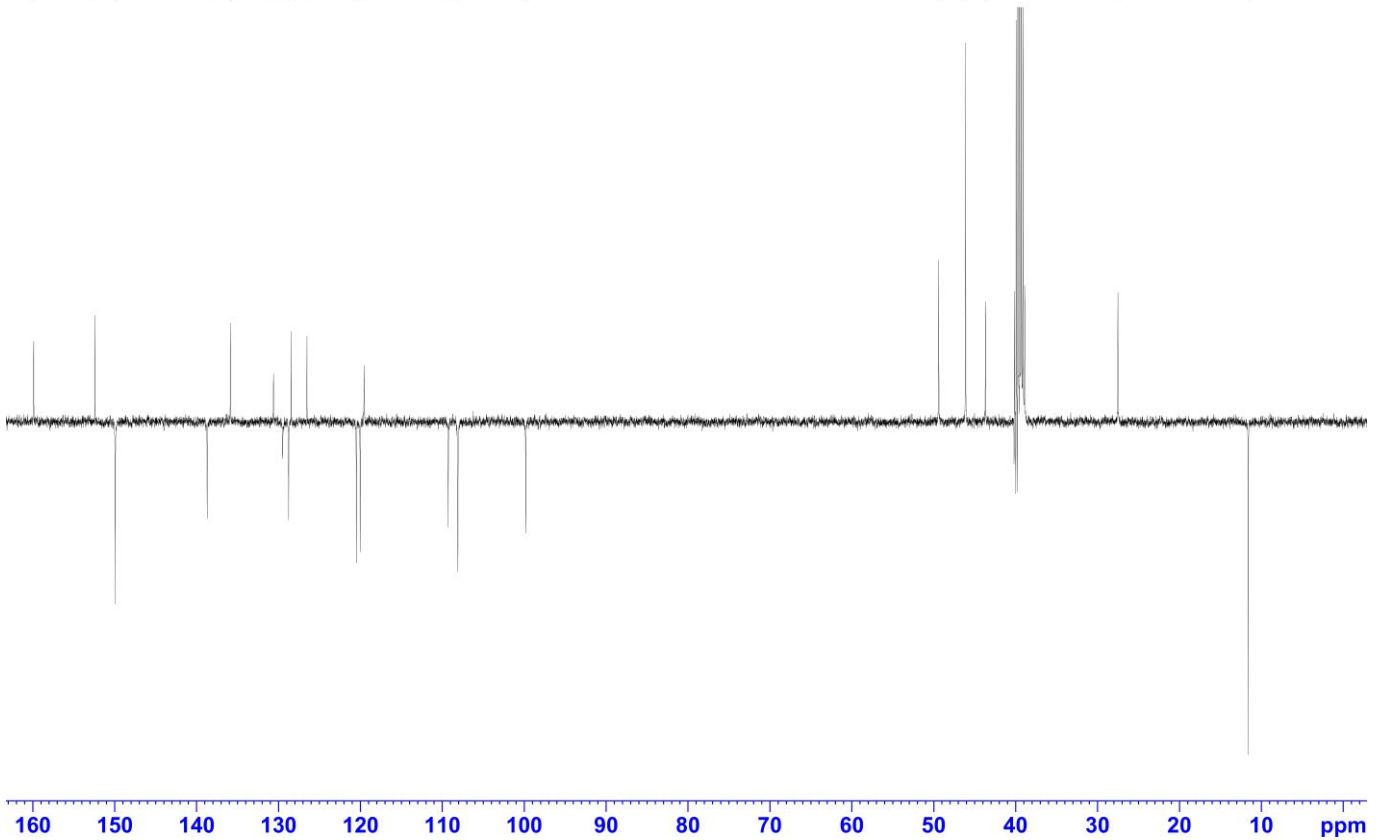

—11.71

8.22  
8.12  
8.11  
7.49  
7.49  
7.47  
7.45  
7.38  
7.37  
7.33  
7.33  
7.29  
7.17  
7.15  
7.13  
6.64  
6.63  
6.35  
6.34

4.20  
4.19  
4.17  
2.41  
2.39  
2.37  
2.36  
2.35  
2.33  
2.31  
1.79  
1.77  
1.75  
1.73  
1.72  
1.39  
1.38  
1.36  
1.34  
1.32  
0.91  
0.90  
0.88

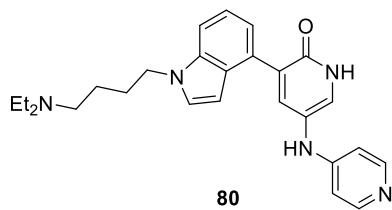

11 10 9 8 7 6 5 4 3 2 1 0 ppm

160.0

152.4

149.9

138.6

135.9

130.5

128.7

128.5

126.5

120.5

120.0

119.5

109.3

108.1

99.8

51.8

46.2

45.5

27.8

24.1

11.7

160 150 140 130 120 110 100 90 80 70 60 50 40 30 20 10 ppm

— 11.69

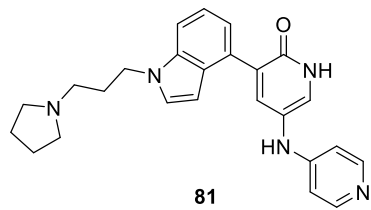

8.24  
8.12  
8.11  
7.50  
7.49  
7.46  
7.44  
7.37  
7.34  
7.33  
7.29  
7.27  
7.17  
7.15  
7.14  
6.65  
6.63  
6.36  
6.35

4.24  
4.23  
4.21

2.44  
2.38  
2.36  
2.35  
1.95  
1.93  
1.92  
1.90  
1.88  
1.69

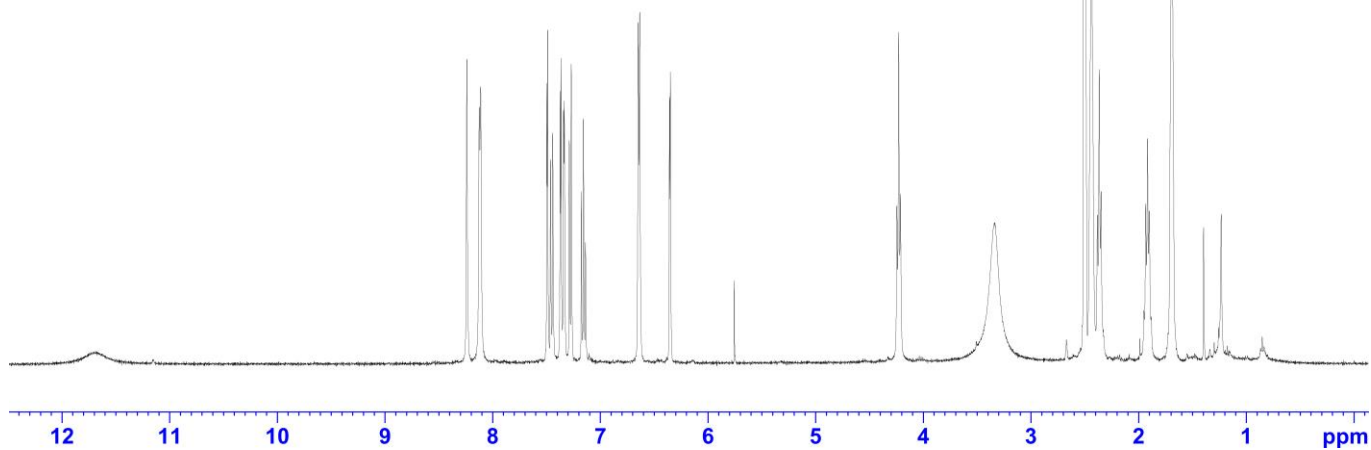

159.9

152.5

149.9

138.7

135.9

130.6

129.5

128.8

128.4

126.5

120.5

120.0

119.5

109.3

108.1

99.9

53.5

52.5

43.6

29.0

23.1

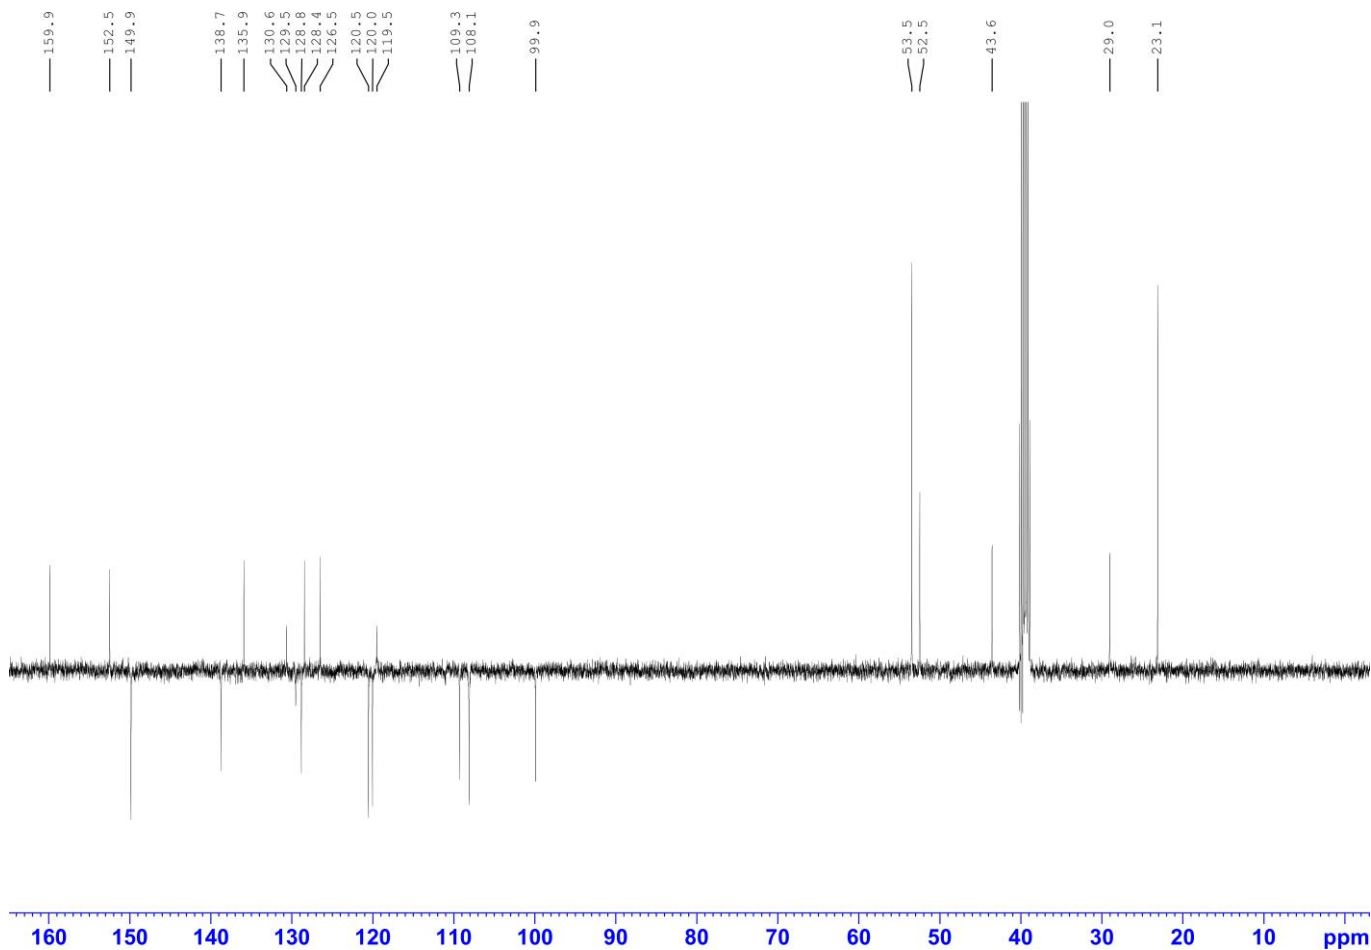

—11.71

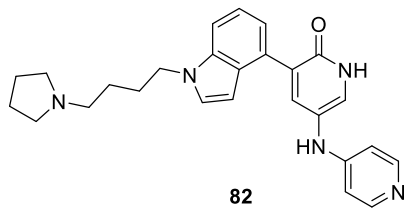

8.22  
8.12  
8.11  
7.49  
7.49  
7.46  
7.44  
7.38  
7.38  
7.33  
7.33  
7.29  
7.27  
7.17  
7.15  
7.13  
6.64  
6.63  
6.63  
6.35  
6.34

4.21  
4.19  
4.17

2.37  
2.35  
2.34  
1.81  
1.80  
1.78  
1.76  
1.74  
1.63  
1.43  
1.41  
1.40  
1.38  
1.36

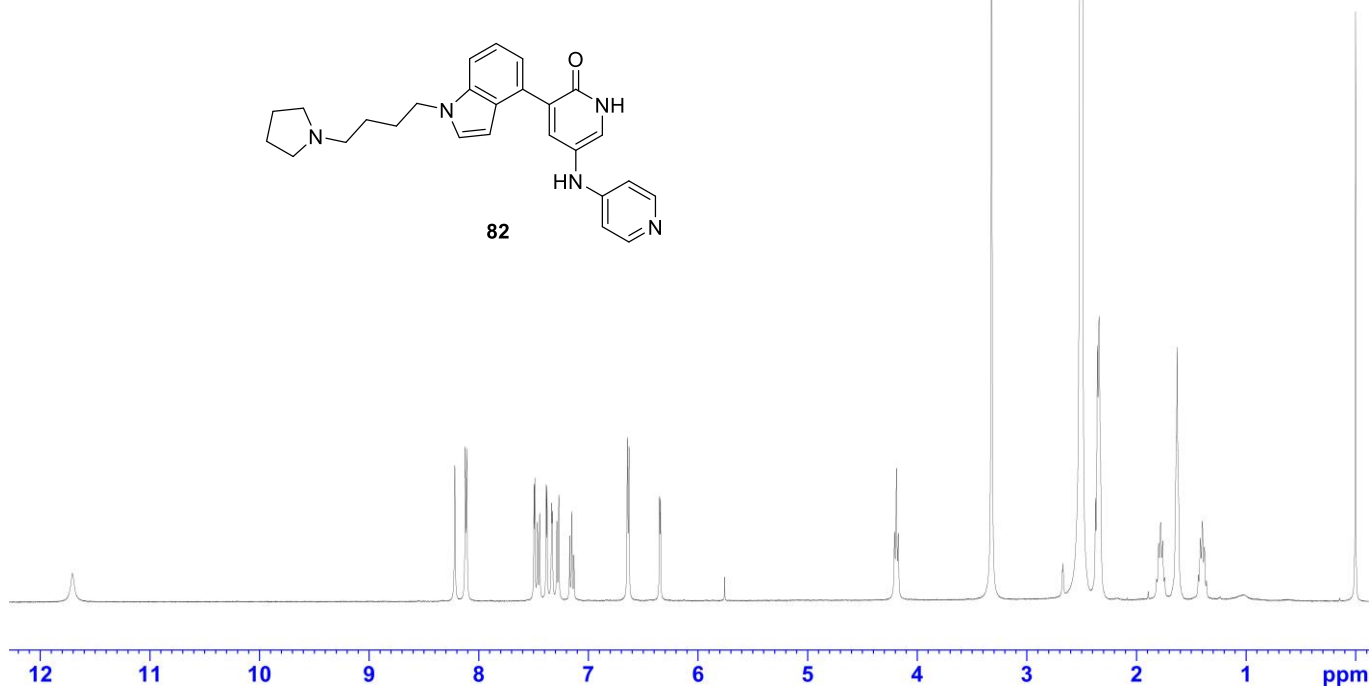

159.9  
152.5  
149.9  
138.7  
135.9  
130.7  
129.5  
128.8  
128.5  
126.5  
120.5  
120.0  
119.6

109.4  
108.1  
99.8

55.0  
53.5  
45.4

27.8  
25.5  
23.0

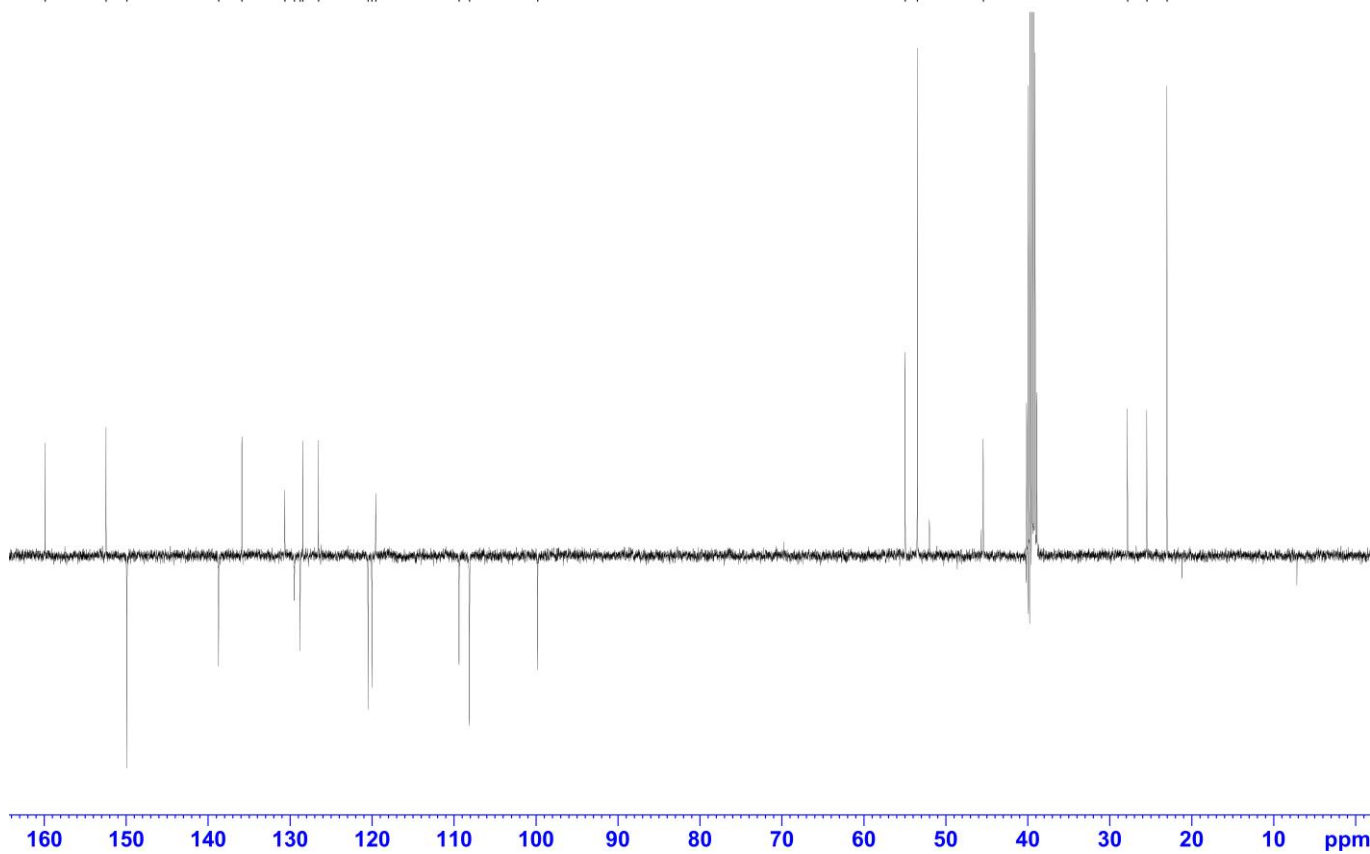

—11.71

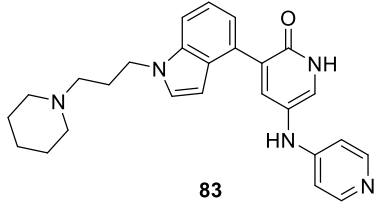

8.22  
8.12  
8.11  
7.49  
7.46  
7.44  
7.37  
7.36  
7.33  
7.29  
7.27  
7.17  
7.15  
7.13  
6.64  
6.63  
6.35  
6.35

4.22  
4.20  
4.19

2.32  
2.21  
2.18  
2.16  
2.14  
1.92  
1.91  
1.89  
1.87  
1.86  
1.54  
1.46  
1.42  
1.33

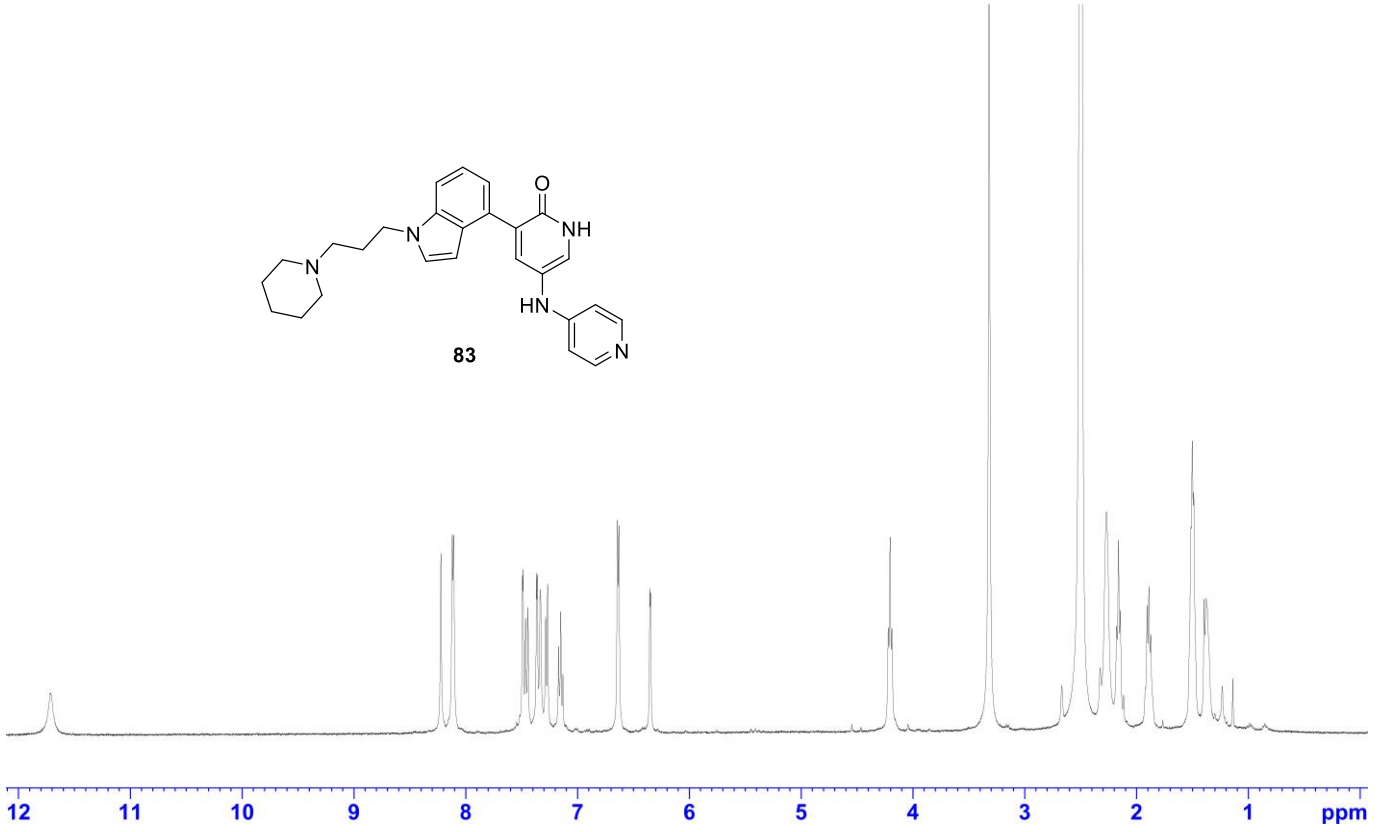

159.9  
152.5  
149.9  
138.7  
135.9  
130.6  
129.5  
128.8  
128.4  
126.5  
120.5  
120.0  
119.5

109.3  
108.1  
99.9

55.2  
53.9

43.5

27.1  
25.6  
24.1

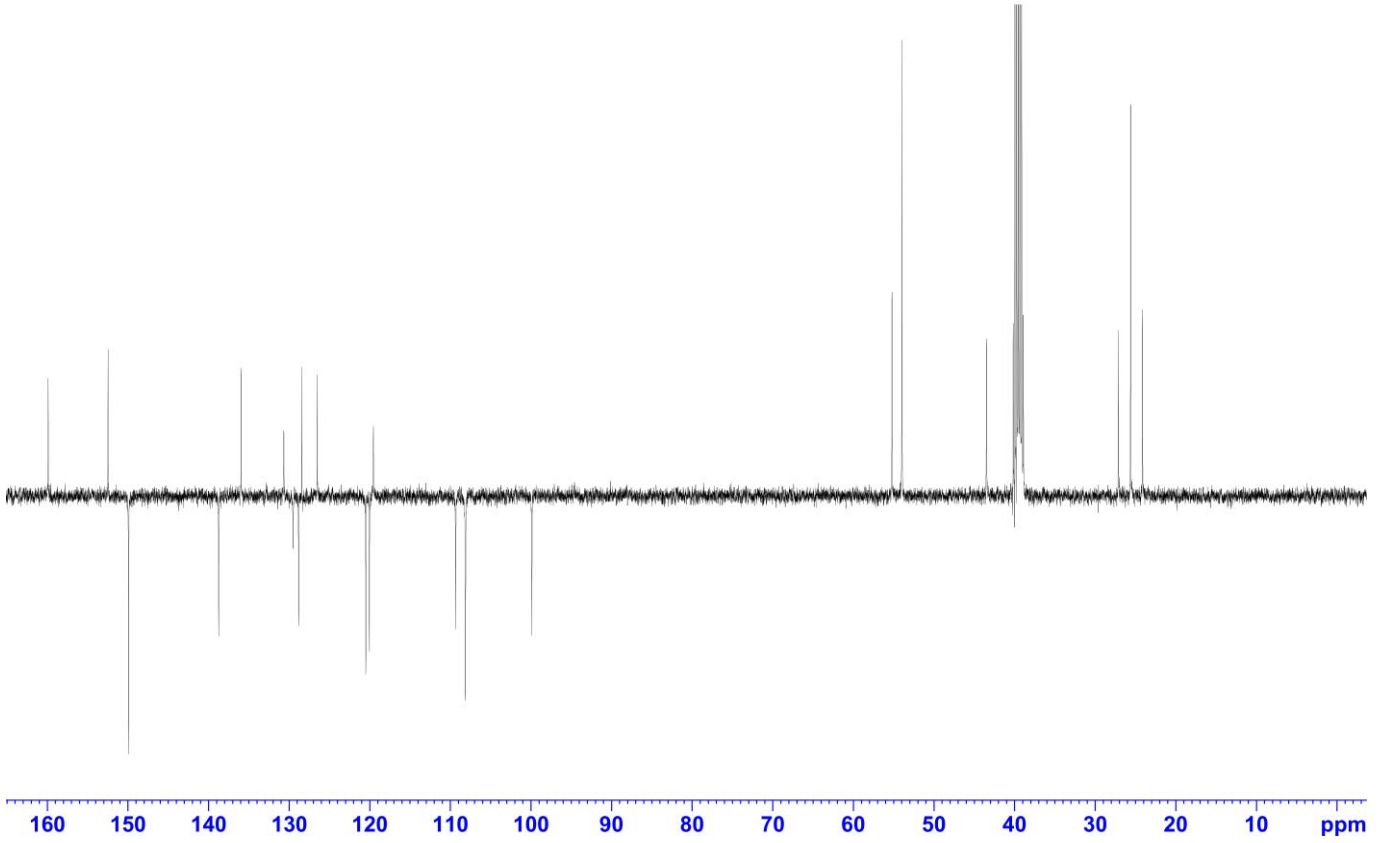

— 11.68

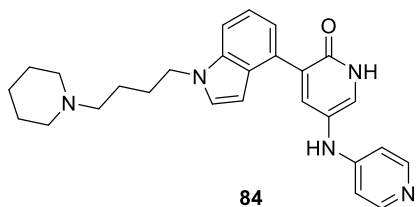

8.21  
8.11  
7.48  
7.47  
7.46  
7.44  
7.37  
7.34  
7.33  
7.29  
7.27  
7.16  
7.15  
7.13  
6.63  
6.35  
6.34

4.20  
4.18  
4.17

2.27  
2.23  
2.22  
2.20  
2.19  
2.19  
1.78  
1.76  
1.75  
1.73  
1.71  
1.48  
1.30

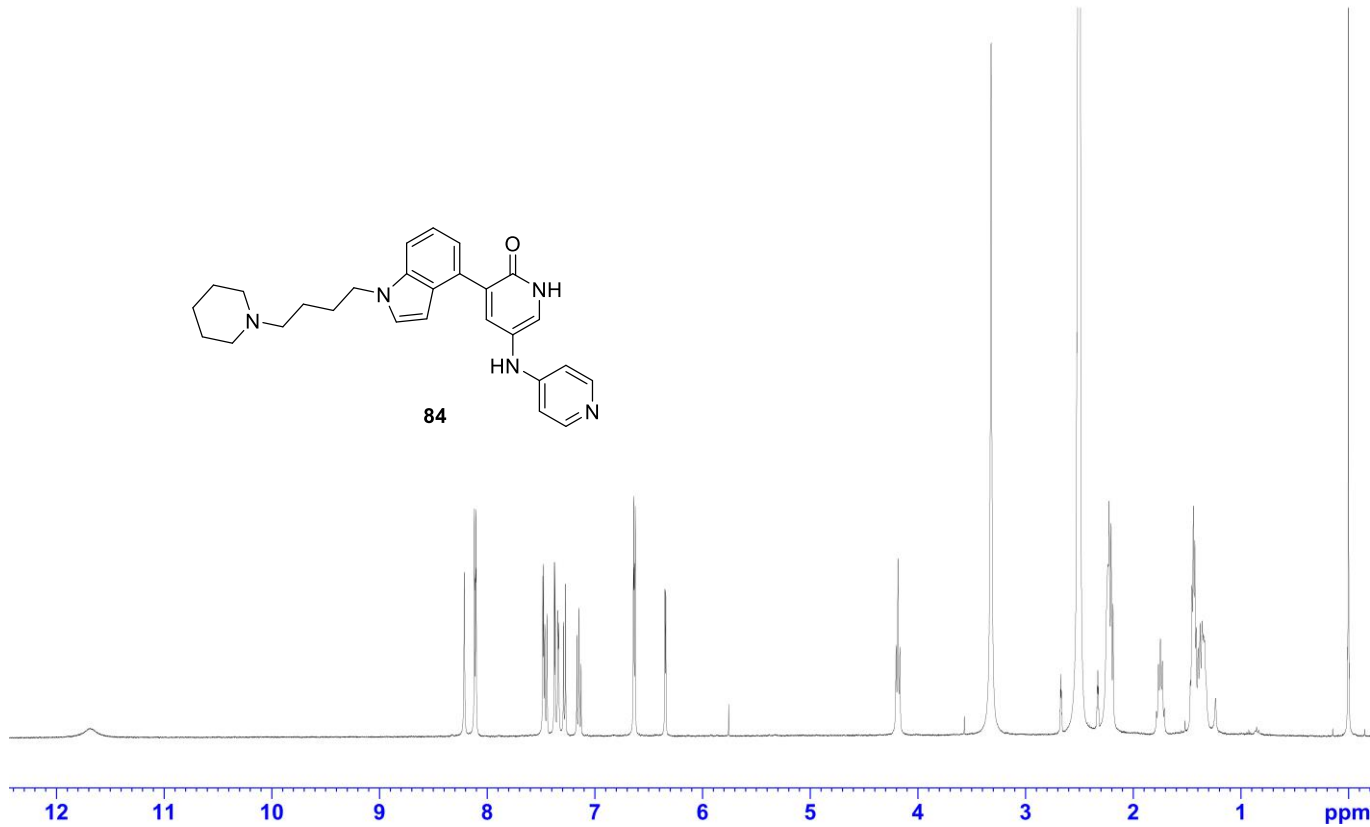

160.1  
152.5  
149.9  
138.6  
135.8  
130.4  
128.9  
128.7  
128.6  
126.5  
120.5  
120.0  
119.5

109.3  
108.1  
99.8

57.9  
54.0

45.5

27.8  
25.6  
24.2  
23.6

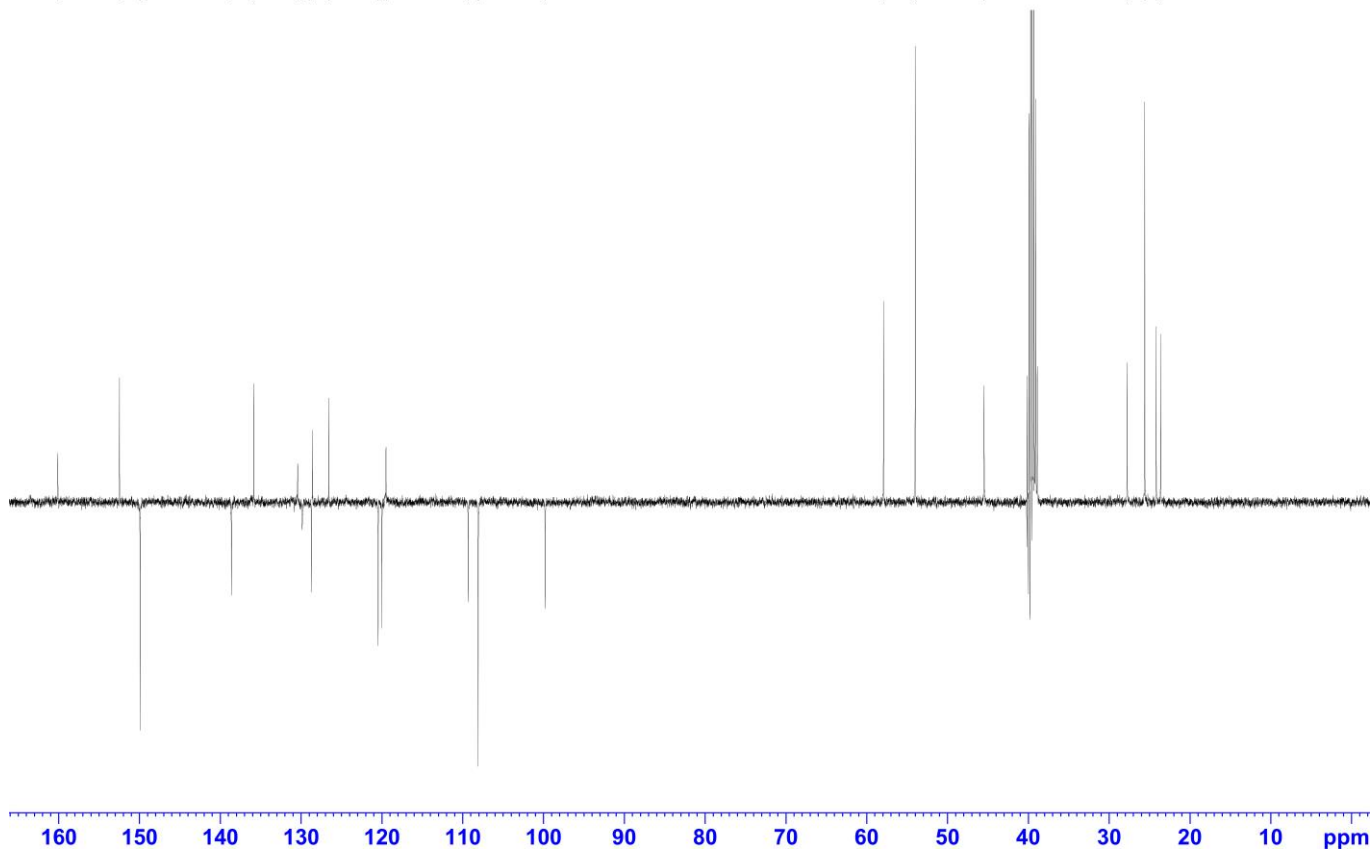



—11.71

8.23  
8.12  
8.11  
7.49  
7.49  
7.47  
7.45  
7.38  
7.37  
7.33  
7.29  
7.27  
7.17  
7.15  
7.13  
6.64  
6.63  
6.35  
6.35

4.24  
4.22  
4.21  
3.60  
3.55

2.34  
2.25  
2.21  
2.20  
2.18  
1.94  
1.92  
1.91  
1.89  
1.87

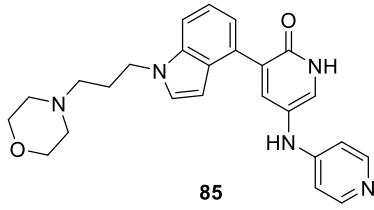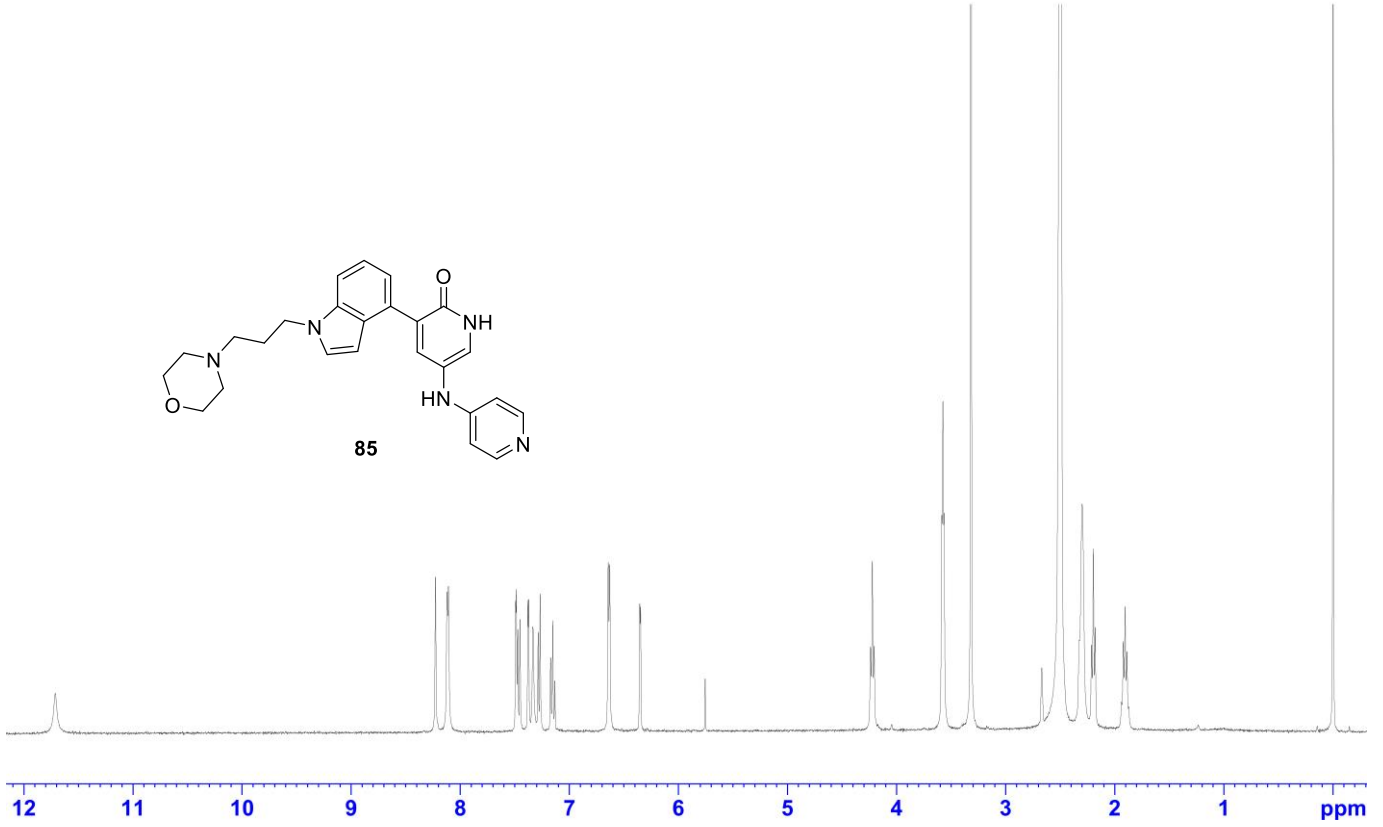

—159.9

—152.5

—149.9

—138.7

—135.9

—130.6

—129.5

—128.6

—126.5

—120.5

—120.0

—119.5

—109.3

—108.1

—99.9

—66.2

—55.0

—53.2

—43.4

—26.7

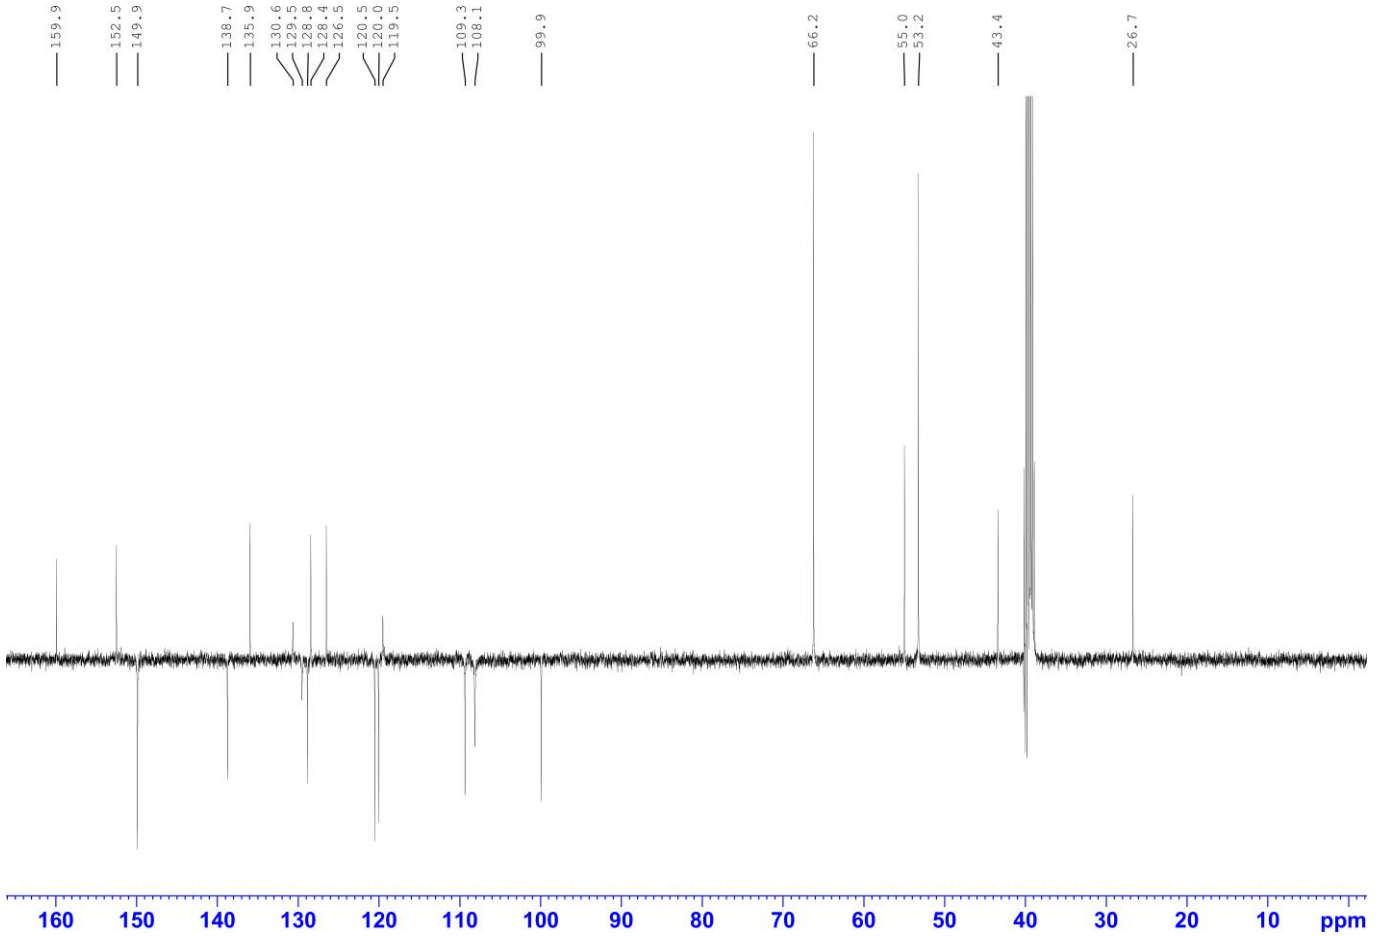

—11.70

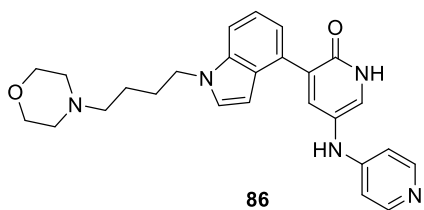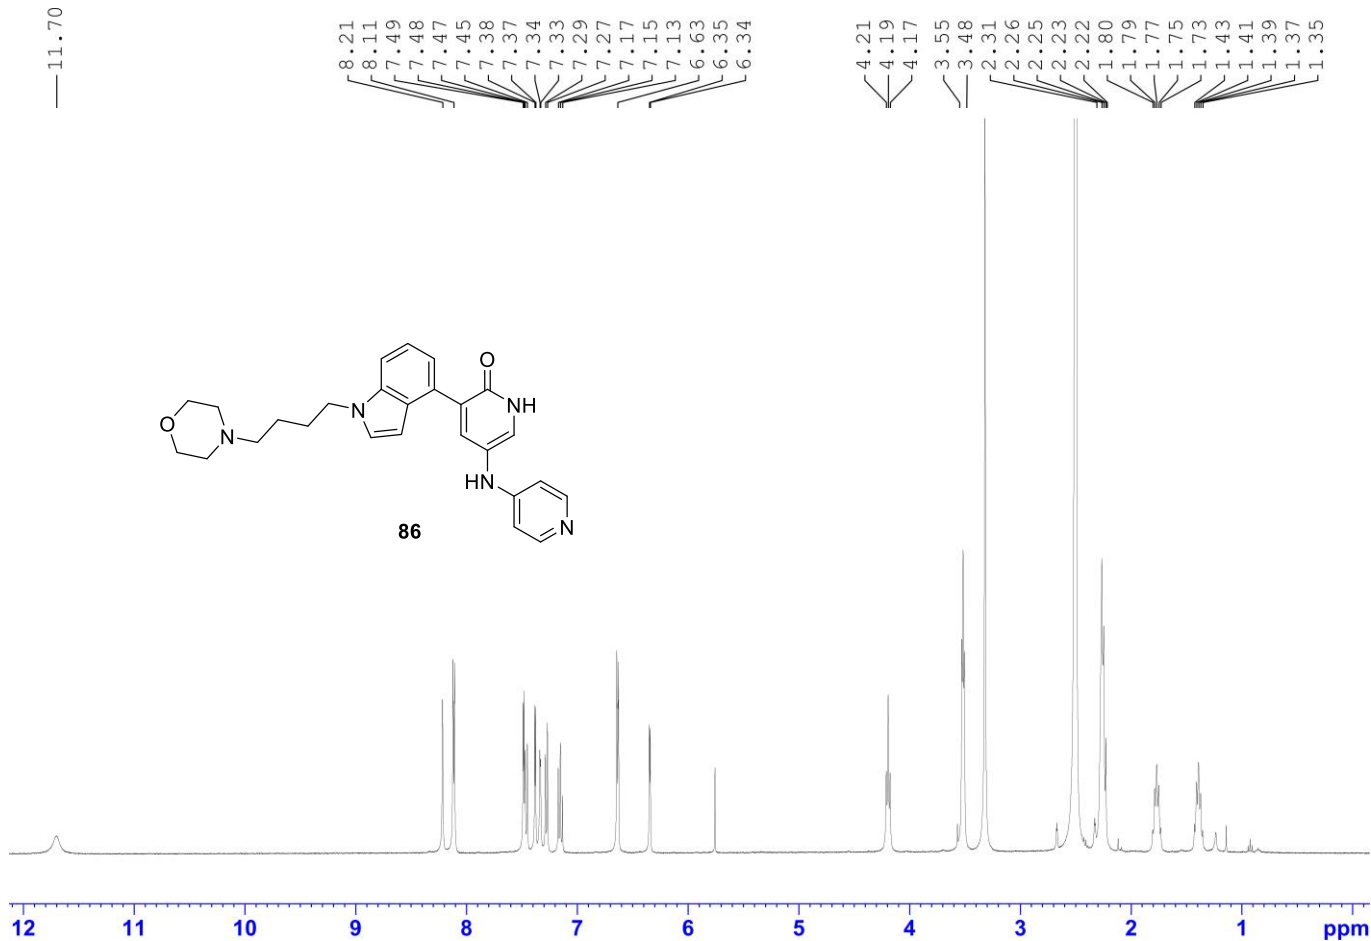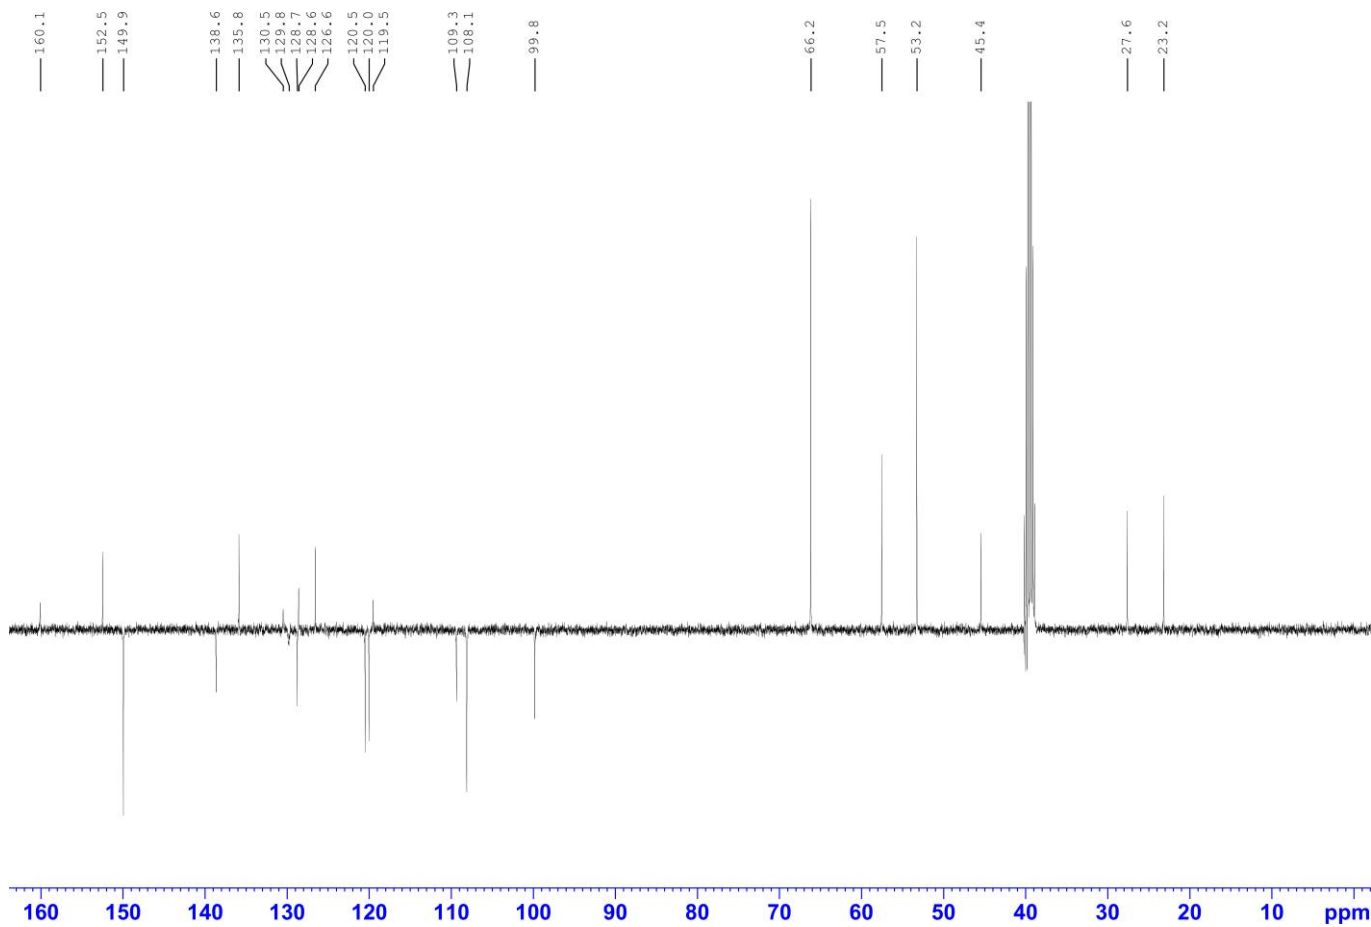

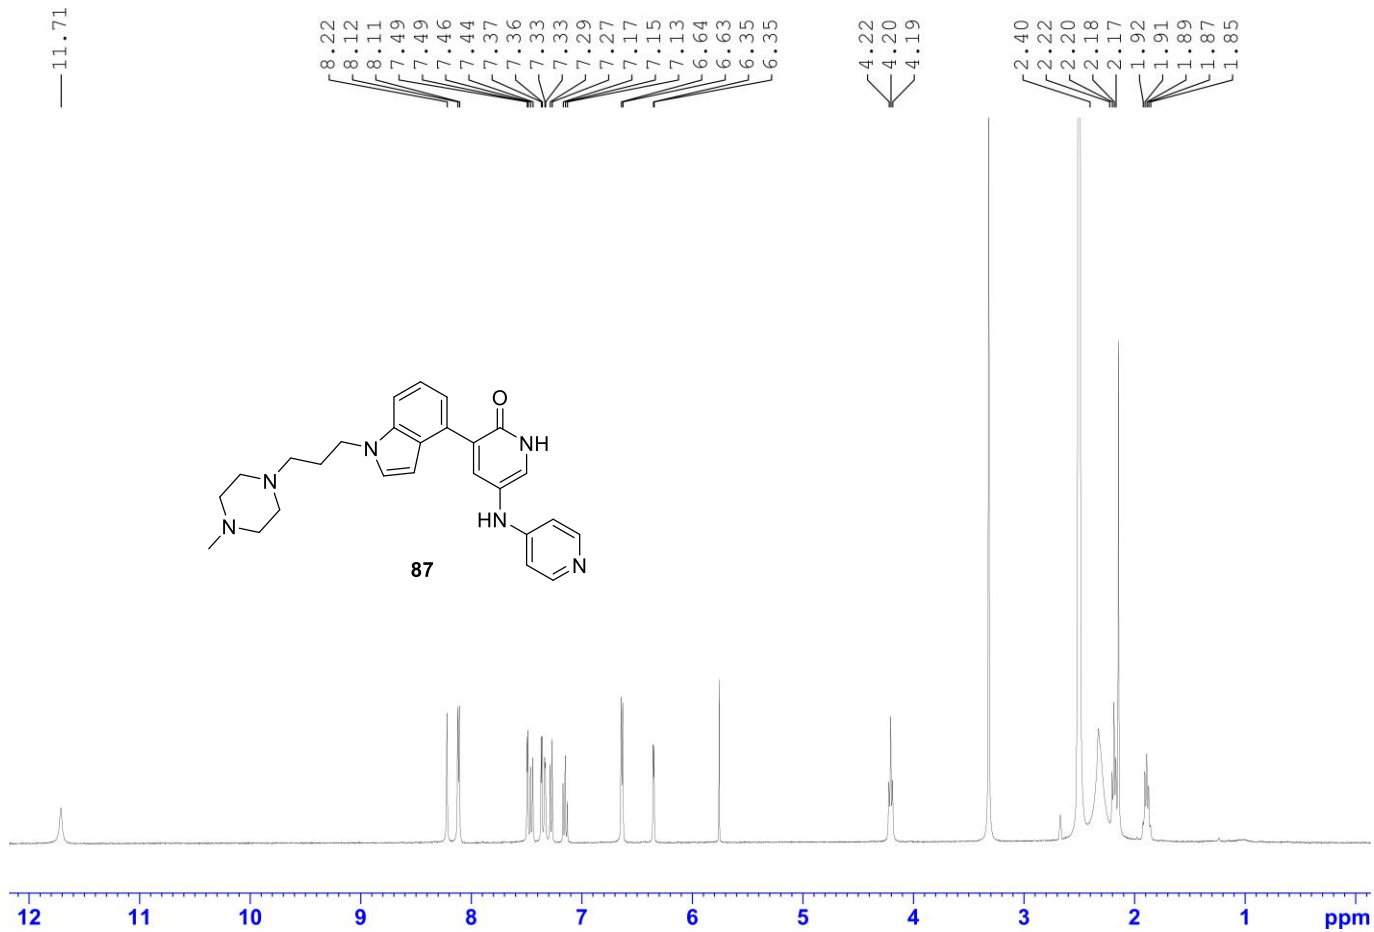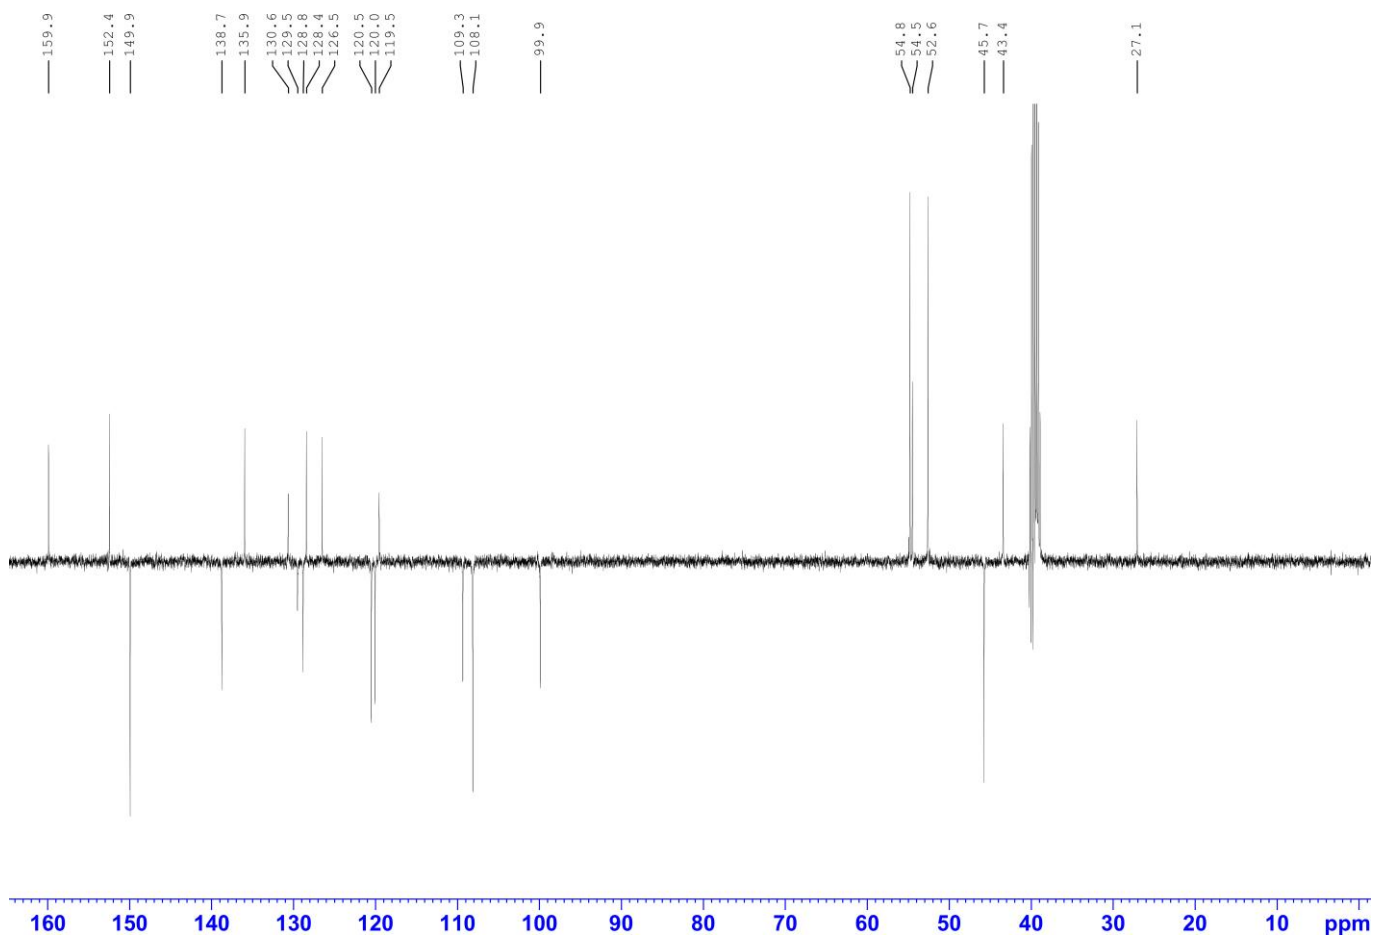

—11.67

8.21  
8.11  
8.10  
7.48  
7.47  
7.44  
7.37  
7.36  
7.34  
7.29  
7.27  
7.16  
7.14  
6.64  
6.62  
6.35  
6.34

4.20  
4.18  
4.16

2.38  
2.25  
2.24  
2.22  
2.16  
2.11  
1.79  
1.77  
1.75  
1.73  
1.72  
1.41  
1.40  
1.38  
1.36

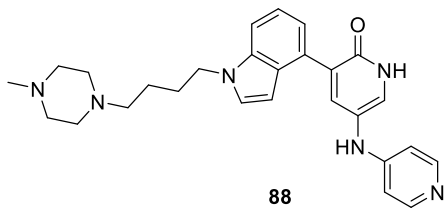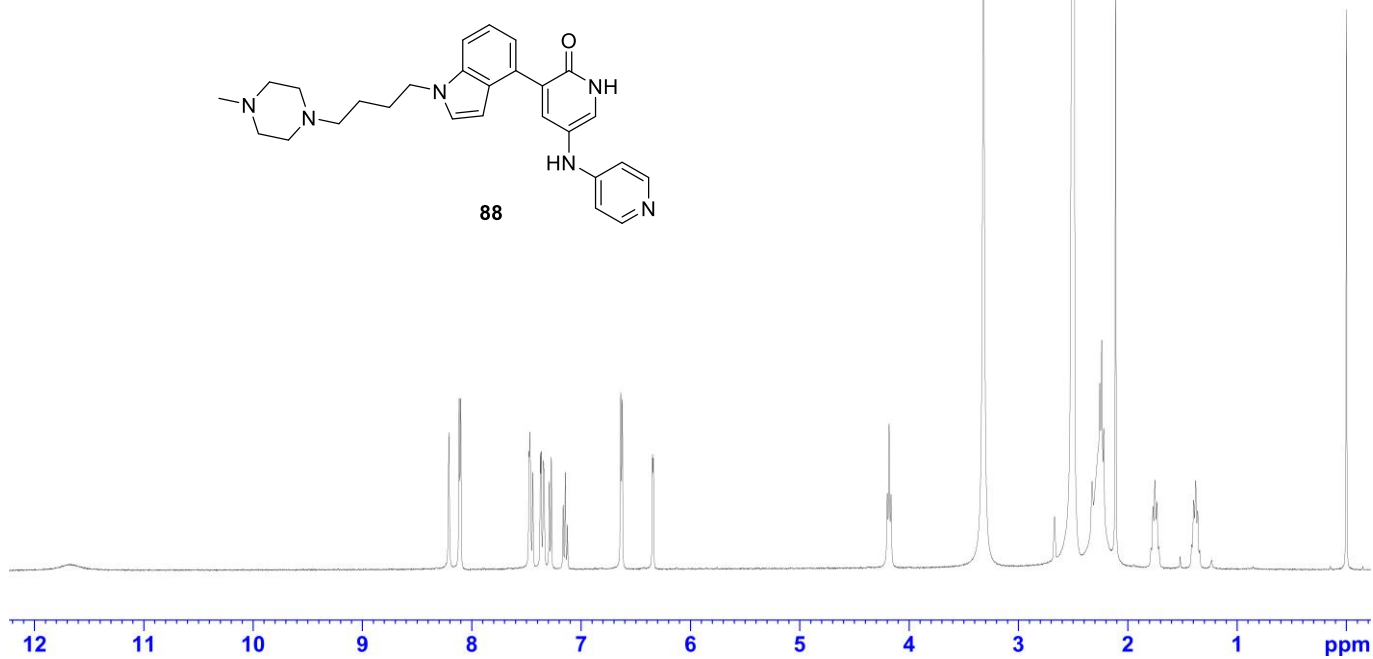

160.0  
152.5  
149.9

138.6  
135.8  
130.5  
129.8  
128.7  
128.6  
126.5

120.5  
120.0  
119.5

109.4  
108.1

99.8

57.1  
54.8  
52.6

45.7  
45.4

27.7  
23.5

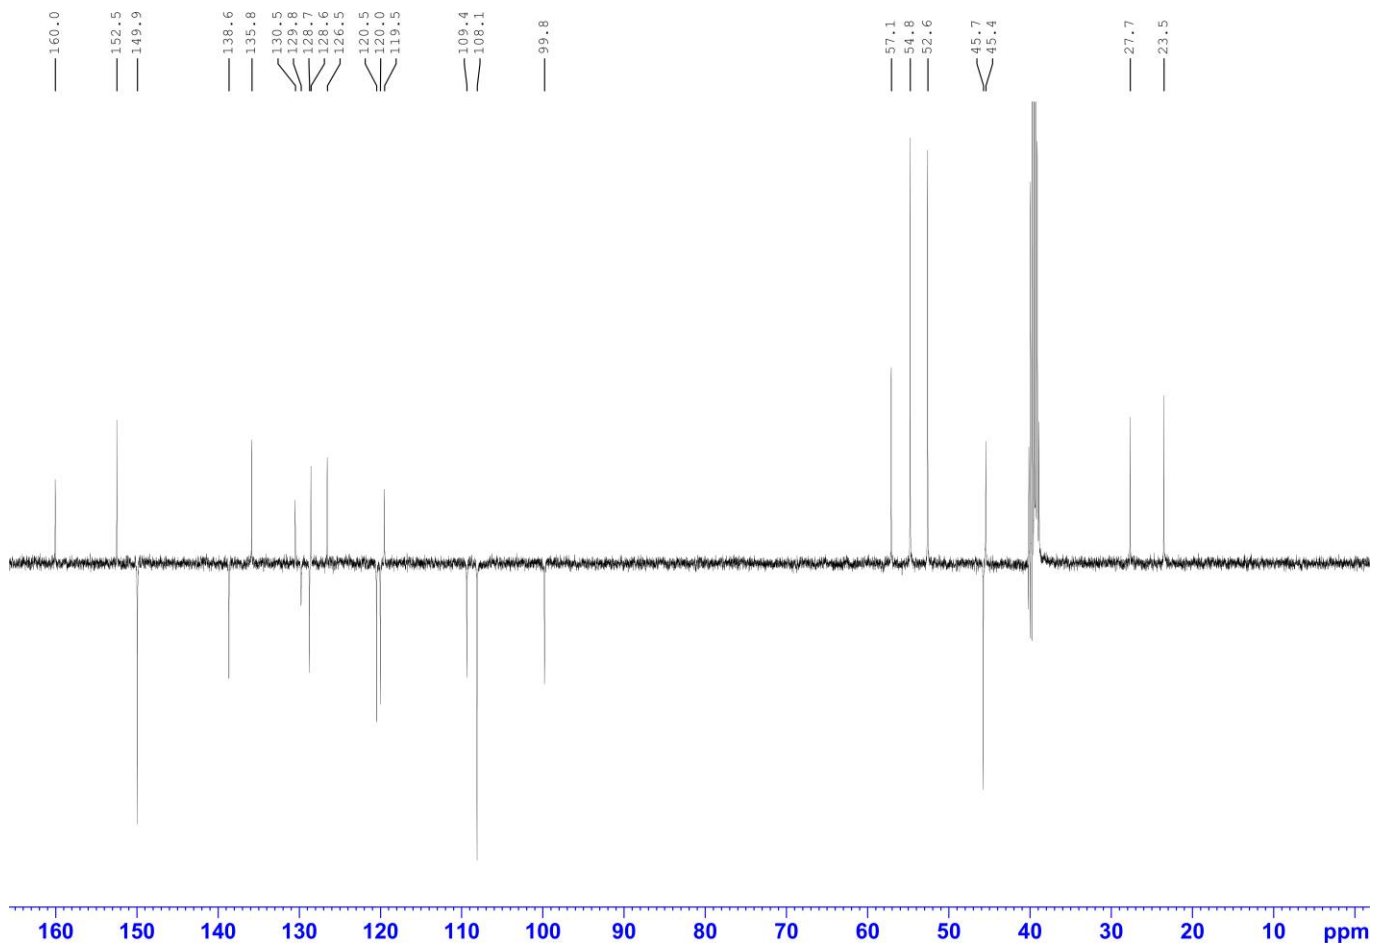

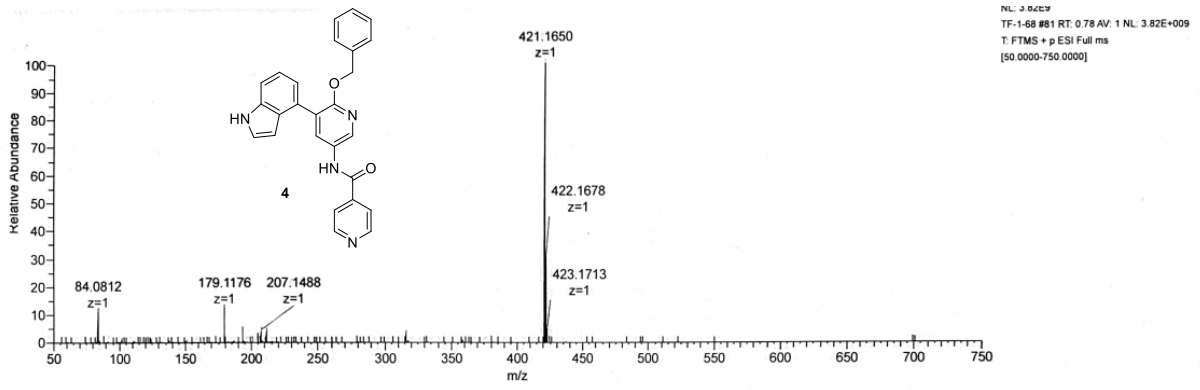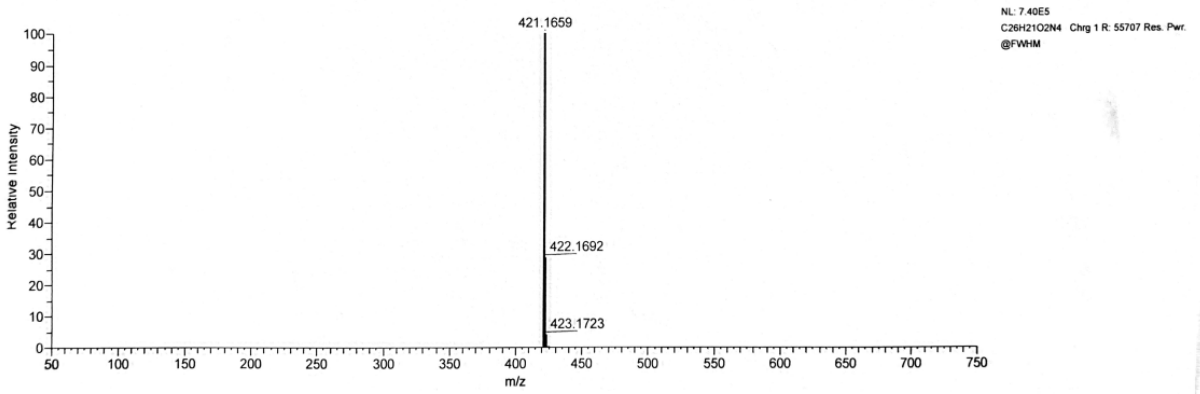

| index | m/z      | Formula                                                       | Score | RDB  | Delta ppm | OriginalFormula | Theo. Mass |
|-------|----------|---------------------------------------------------------------|-------|------|-----------|-----------------|------------|
| 1     | 421.1650 | C <sub>26</sub> H <sub>21</sub> O <sub>2</sub> N <sub>4</sub> | 100   | 18.5 | -2.12     | C26H21O2N4      | 421.16590  |

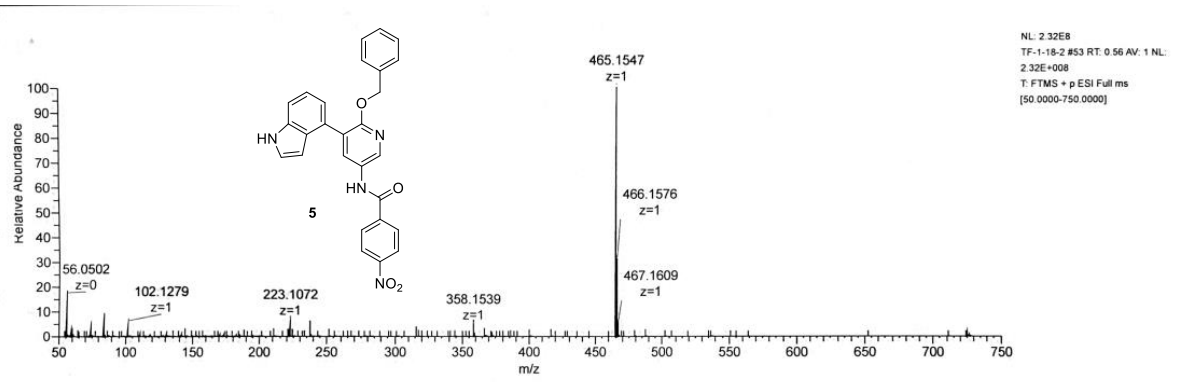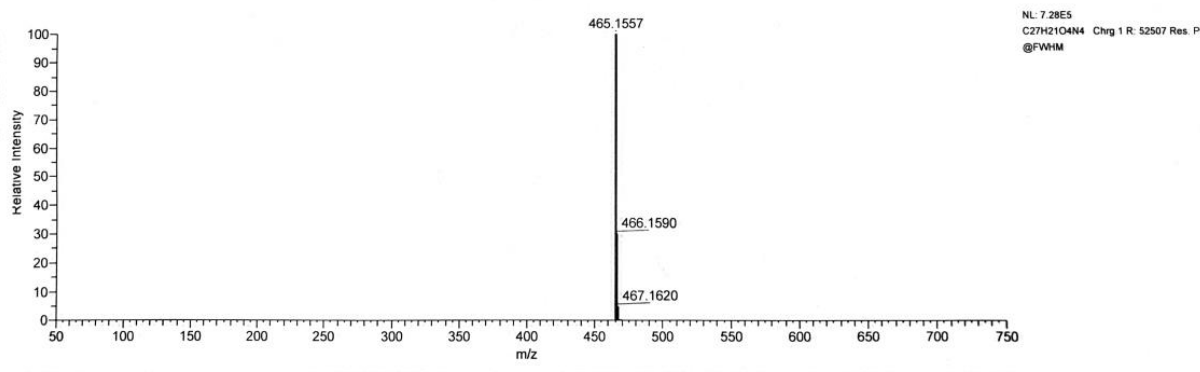

| index | m/z      | Formula                                                       | Score | RDB  | Delta ppm | OriginalFormula | Theo. Mass |
|-------|----------|---------------------------------------------------------------|-------|------|-----------|-----------------|------------|
| 1     | 465.1547 | C <sub>27</sub> H <sub>21</sub> O <sub>4</sub> N <sub>4</sub> | 100   | 19.5 | -2.3      | C27H21O4N4      | 465.15573  |

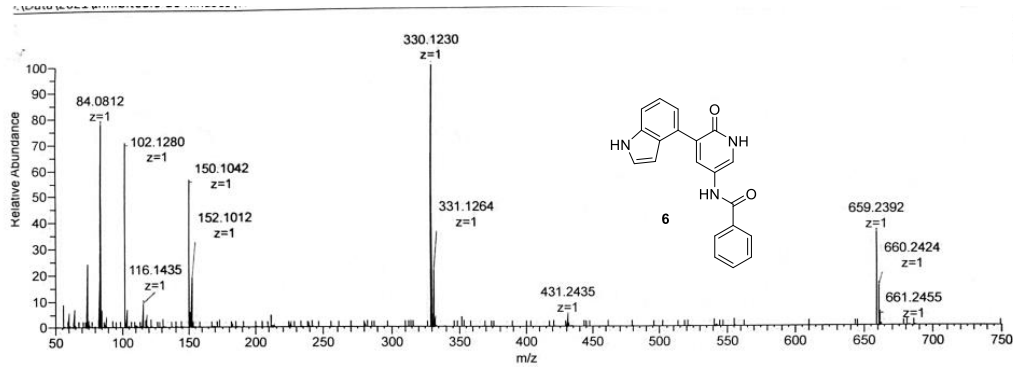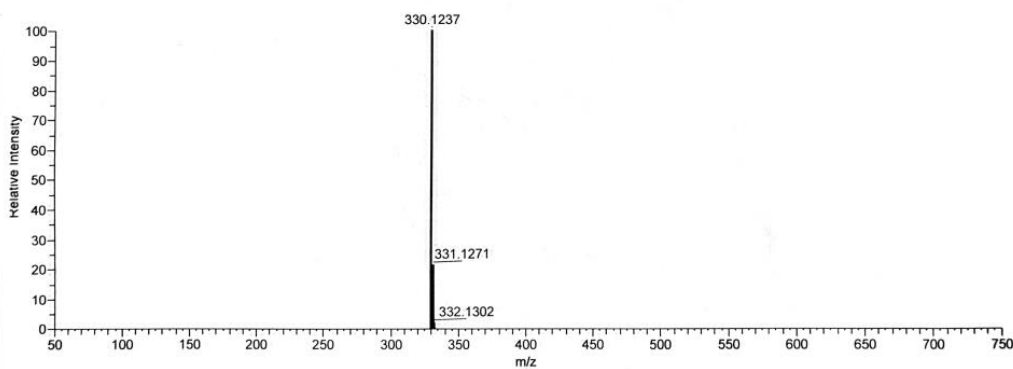

| index | m/z      | Formula                                                       | Score | RDB  | Delta ppm | OriginalFormula | Theo. Mass |
|-------|----------|---------------------------------------------------------------|-------|------|-----------|-----------------|------------|
| 1     | 330.1230 | C <sub>20</sub> H <sub>16</sub> O <sub>2</sub> N <sub>3</sub> | 100   | 14.5 | -2.08     | C20H16O2N3      | 330.12370  |

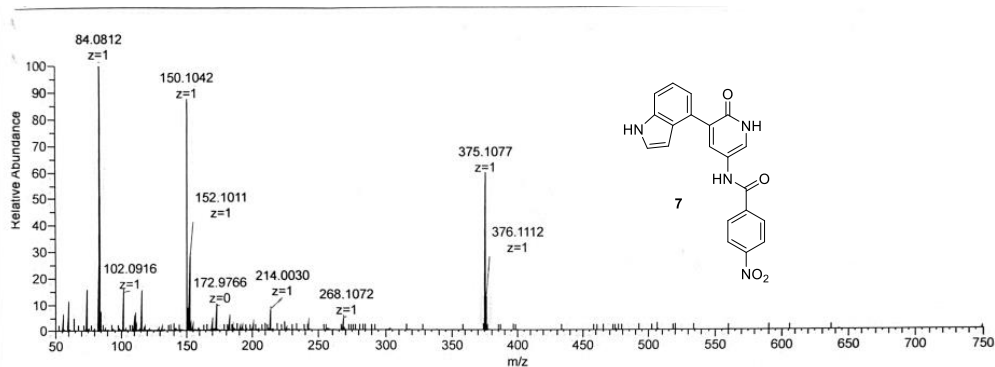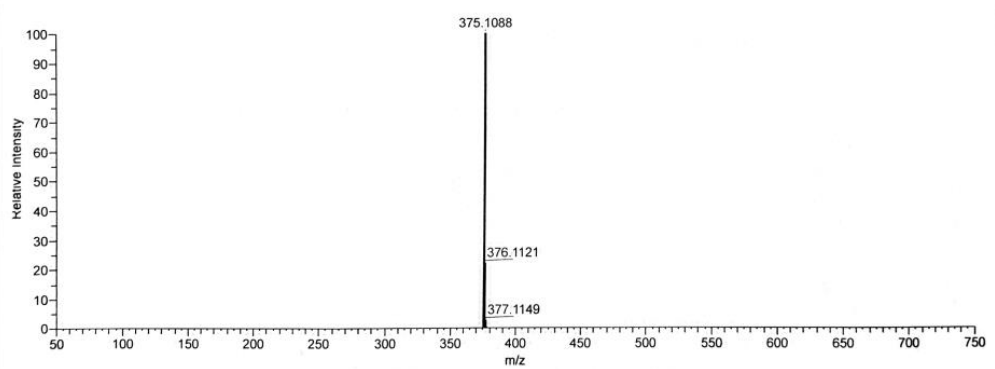

| index | m/z      | Formula                                                       | Score | RDB  | Delta ppm | OriginalFormula | Theo. Mass |
|-------|----------|---------------------------------------------------------------|-------|------|-----------|-----------------|------------|
| 1     | 375.1077 | C <sub>20</sub> H <sub>15</sub> O <sub>4</sub> N <sub>4</sub> | 100   | 15.5 | -2.89     | C20H15O4N4      | 375.10878  |

NL: 5.80E8  
 TF-1 #87 RT: 0.85 AV: 1 NL: 5.80E+008  
 T: FTMS + p ESI Full ms  
 [50 0000-750 0000]

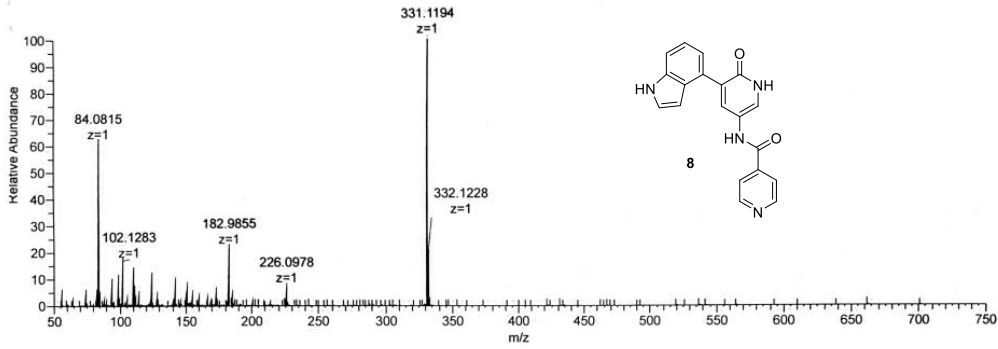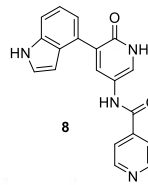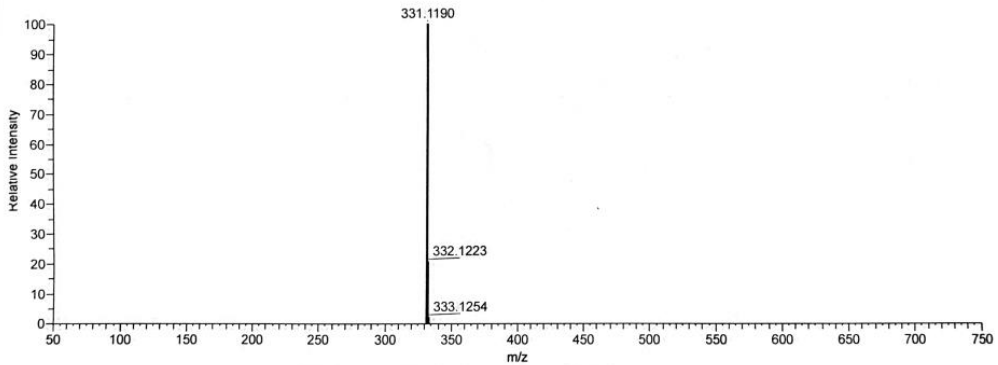

NL: 7.98E5  
 C19H15O2N4 Chrg 1 R: 63007 Res. Pwr:  
 @FWHM

| index | m/z      | Formula                                                       | Score | RDB  | Delta ppm | OriginalFormula | Theo. Mass |
|-------|----------|---------------------------------------------------------------|-------|------|-----------|-----------------|------------|
| 1     | 331.1194 | C <sub>19</sub> H <sub>15</sub> O <sub>2</sub> N <sub>4</sub> | 100   | 14.5 | 1.21      | C19H15O2N4      | 331.11895  |

NL: 7.89E8  
 TF-1-70 #91 RT: 0.88 AV: 1 NL: 7.8  
 T: FTMS + p ESI Full ms  
 [50 0000-750 0000]

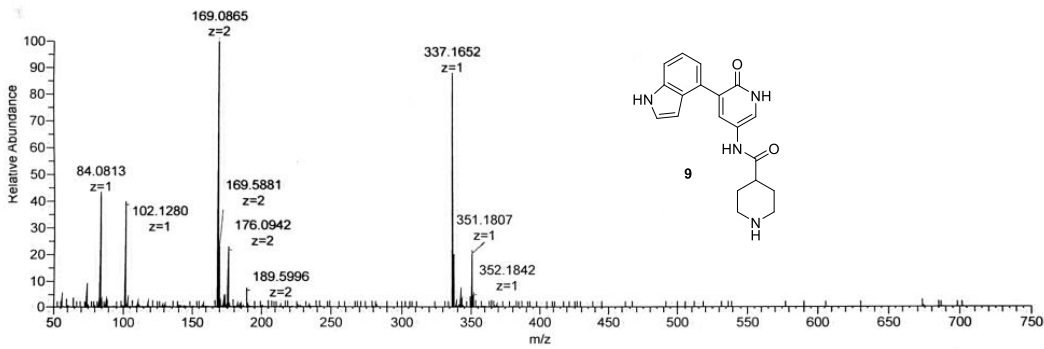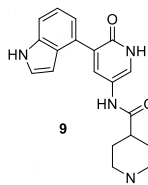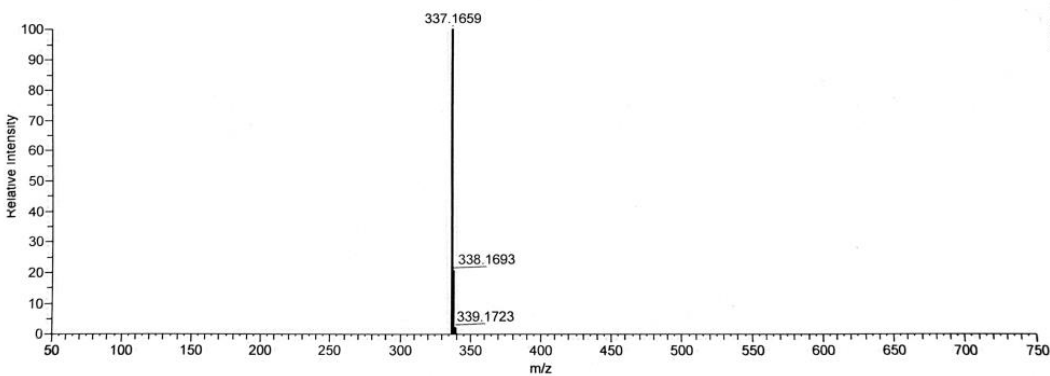

NL: 7.97E5  
 C19H21O2N4 Chrg 1 R: 62307  
 @FWHM

| index | m/z      | Formula                                                       | Score | RDB  | Delta ppm | OriginalFormula | Theo. Mass |
|-------|----------|---------------------------------------------------------------|-------|------|-----------|-----------------|------------|
| 1     | 337.1652 | C <sub>19</sub> H <sub>21</sub> O <sub>2</sub> N <sub>4</sub> | 100   | 11.5 | -2.02     | C19H21O2N4      | 337.16590  |

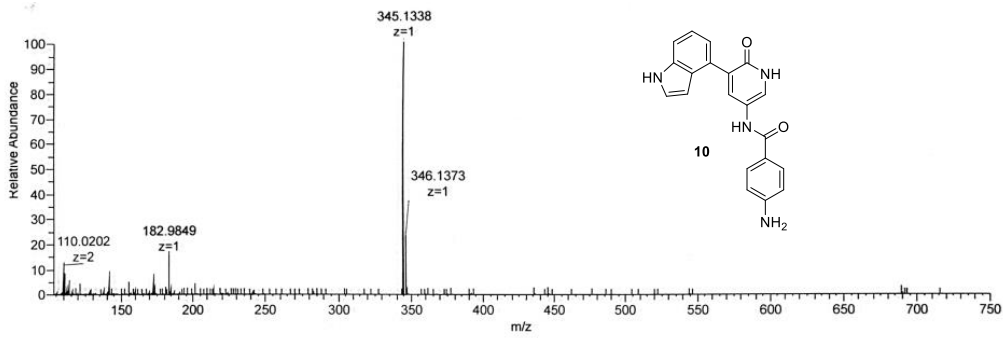

NL: 1.96E8  
 TF-1-46 #191 RT: 1.88 AV: 1 NL:  
 5.37E+008  
 T: FTMS + p ESI Full ms  
 [50.0000-750.0000]

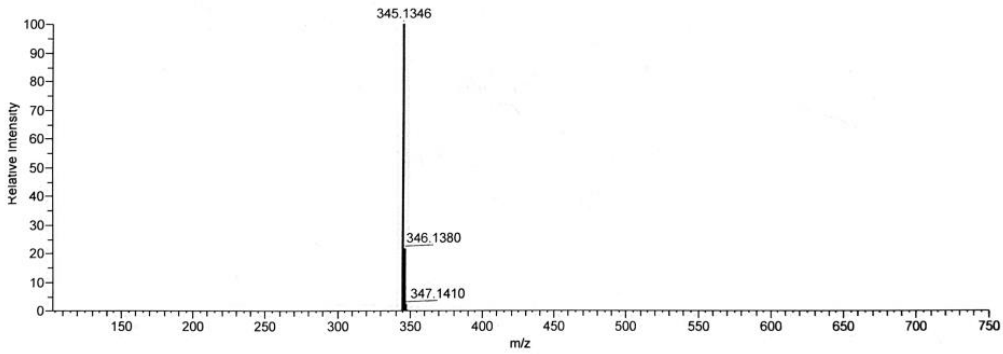

NL: 7.89E5  
 C20H17O2N4 Chrg 1 R: 61807 Res. Pwr.  
 @FWHM

| Index | m/z      | Formula                                                       | Score | RDB  | Delta ppm | OriginalFormula                                               | Theo. Mass |
|-------|----------|---------------------------------------------------------------|-------|------|-----------|---------------------------------------------------------------|------------|
| 1     | 345.1338 | C <sub>20</sub> H <sub>17</sub> O <sub>2</sub> N <sub>4</sub> | 100   | 14.5 | -2.27     | C <sub>20</sub> H <sub>17</sub> O <sub>2</sub> N <sub>4</sub> | 345.13460  |

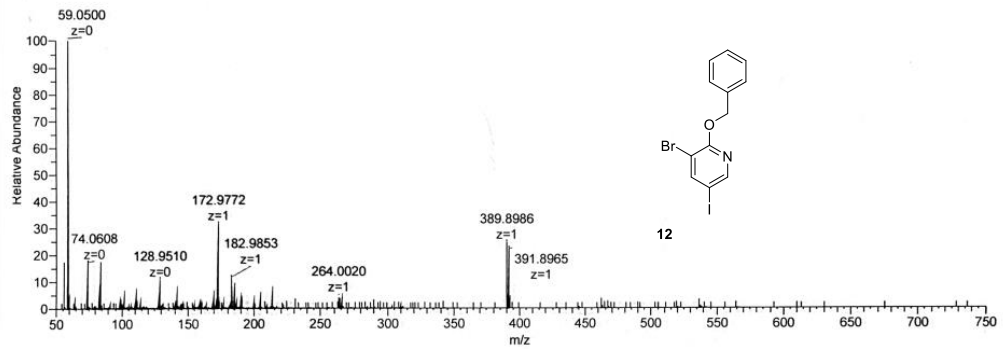

NL: 3.01E8  
 TF-1-60 #97 RT: 0.93 AV: 1 NL: 3.01E+008  
 T: FTMS + p ESI Full ms  
 [50.0000-750.0000]

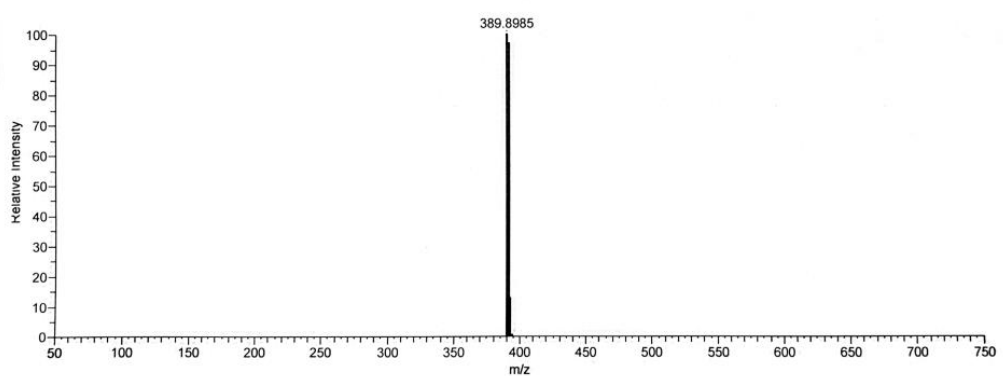

NL: 4.42E5  
 C12H10O1N1Br1I1 Chrg 1 R: 57906 Res.  
 Pwr. @FWHM

| Index | m/z      | Formula                                                              | Score | RDB | Delta ppm | OriginalFormula                                | Theo. Mass |
|-------|----------|----------------------------------------------------------------------|-------|-----|-----------|------------------------------------------------|------------|
| 1     | 389.8986 | C <sub>12</sub> H <sub>10</sub> ON <sup>19</sup> Br <sup>127</sup> I | 100   | 7.5 | 0.24      | C <sub>12</sub> H <sub>10</sub> ON[79]Br[127]I | 389.89850  |



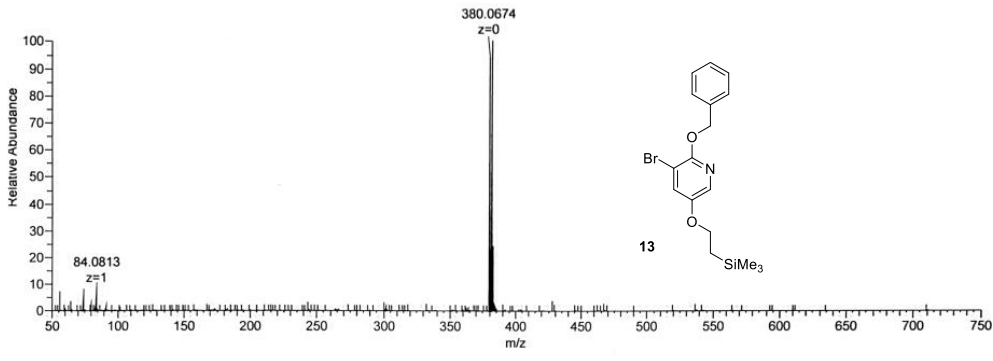

NL: 8.69E8  
 TF-1-110 #93 RT: 0.92 AV: 1 NL:  
 8.69E+008  
 T: FTMS + p ESI Full ms  
 [50.0000-750.0000]

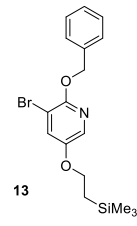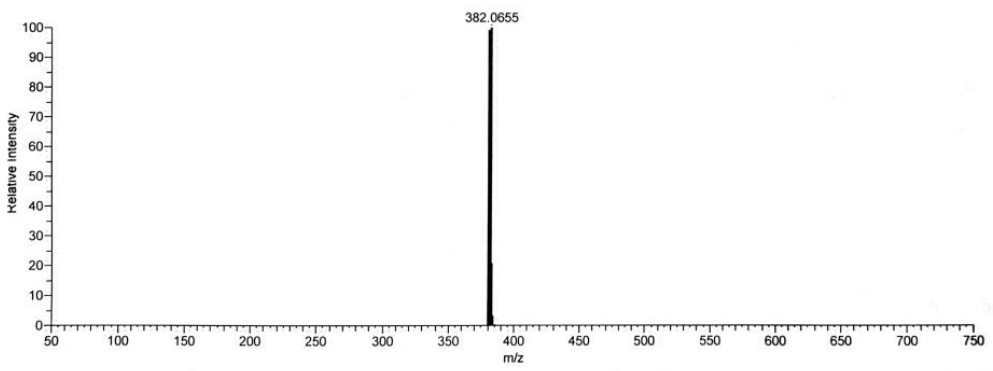

NL: 3.88E5  
 C17H23O2N1Br1Si1 Chrg 1 R: 58502  
 Res. Pwr. @FWHM

| Index | m/z      | Formula                                                                            | Score | RDB | Delta ppm | OriginalFormula       | Theo. Mass |
|-------|----------|------------------------------------------------------------------------------------|-------|-----|-----------|-----------------------|------------|
| 1     | 380.0674 | C <sub>17</sub> H <sub>23</sub> O <sub>2</sub> N <sup>79</sup> Br <sup>78</sup> Si | 100   | 7.5 | -0.56     | C17H23O2N(79)Br[28... | 380.06759  |

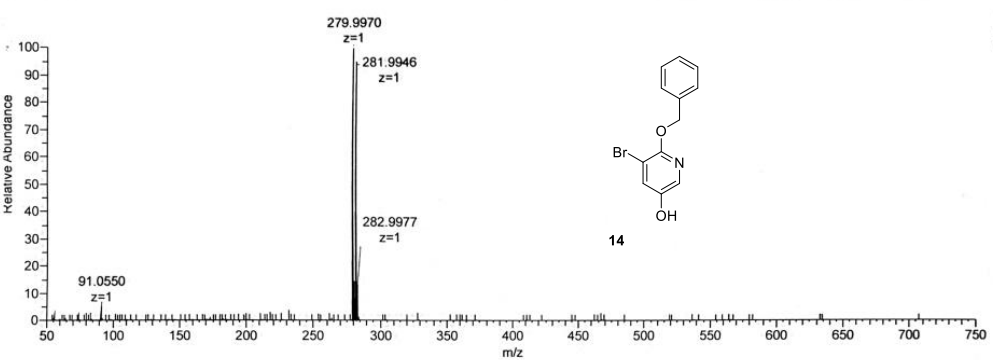

NL: 1.90E9  
 TF-1-111 #93 RT: 0.92 AV: 1 NL: 1.90E+009  
 T: FTMS + p ESI Full ms  
 [50.0000-750.0000]

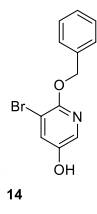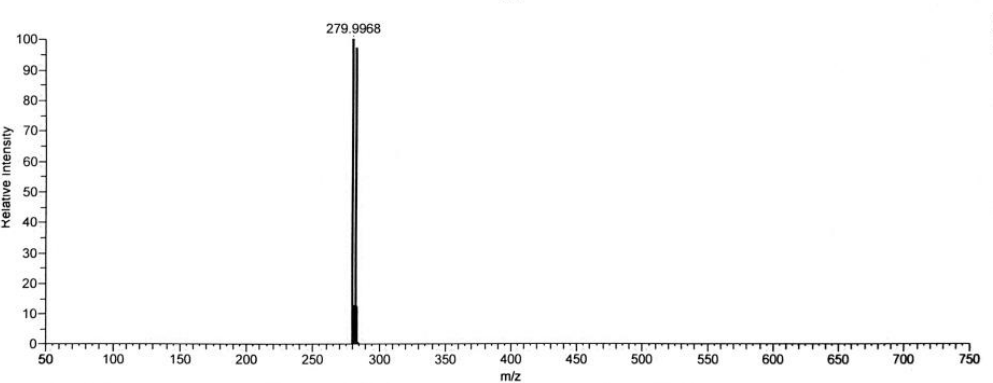

NL: 4.41E5  
 C12H11O2N1Br1 Chrg 1 R: 68306 Res.  
 Pwr. @FWHM

| Index | m/z      | Formula                                                           | Score | RDB | Delta ppm | OriginalFormula | Theo. Mass |
|-------|----------|-------------------------------------------------------------------|-------|-----|-----------|-----------------|------------|
| 1     | 279.9970 | C <sub>12</sub> H <sub>11</sub> O <sub>2</sub> N <sup>79</sup> Br | 100   | 7.5 | 0.97      | C12H11O2N(79)Br | 279.99677  |

NL: 3.62E8  
 TF-1-77 #89 RT: 0.87 AV: 1 NL: 3.6  
 T: FTMS + p ESI Full ms  
 [50.0000-750.0000]

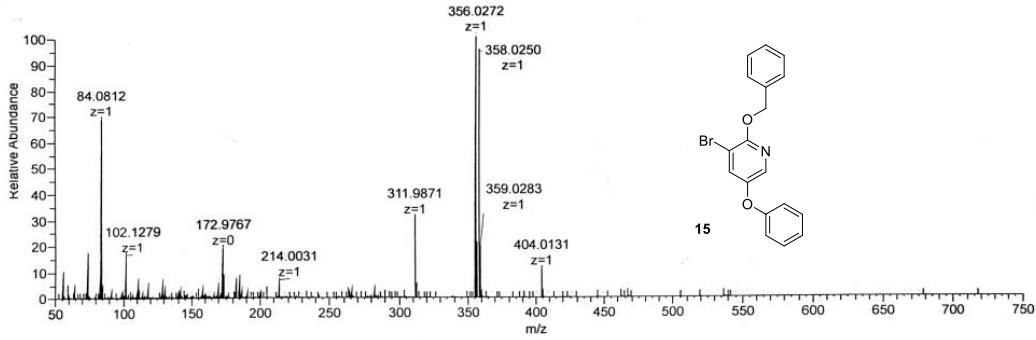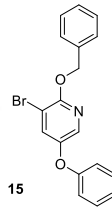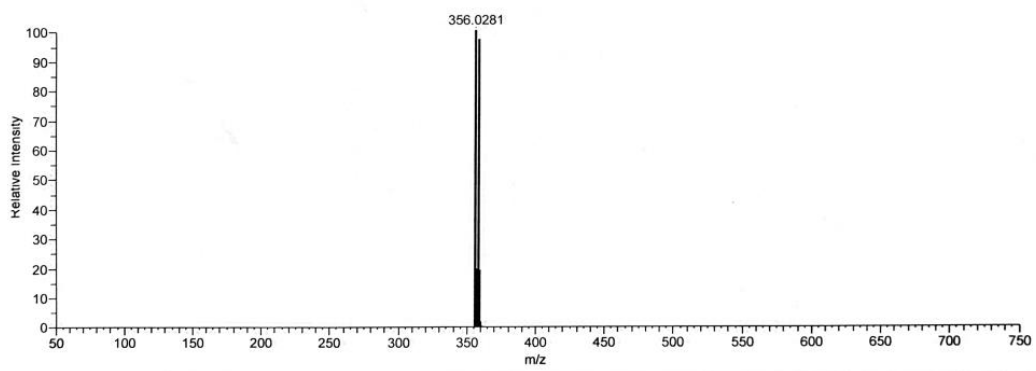

NL: 4.13E5  
 C18H15O2N1Br1 Chrg 1 R: 604  
 Pwr: @FWHM

| Index | m/z      | Formula                                                          | Score | RDB  | Delta ppm | OriginalFormula | Theo. Mass |
|-------|----------|------------------------------------------------------------------|-------|------|-----------|-----------------|------------|
| 1     | 356.0272 | C <sub>18</sub> H <sub>15</sub> O <sub>2</sub> N <sup>1</sup> Br | 100   | 11.5 | -2.46     | C18H15O2N[79]Br | 356.02807  |

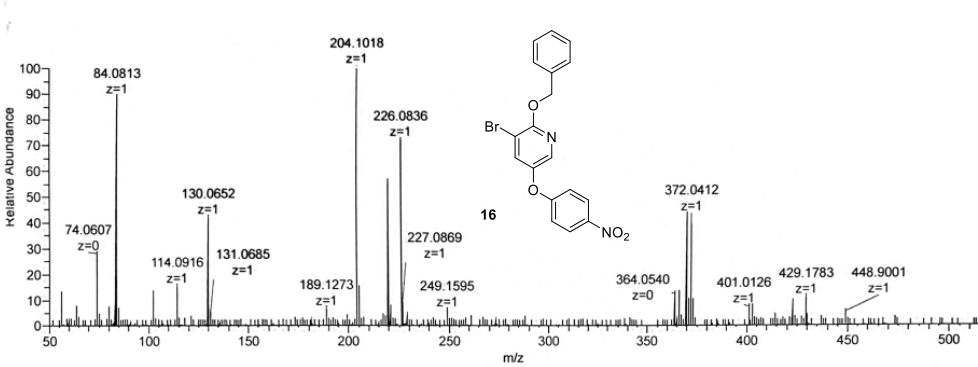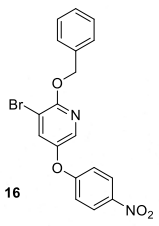

NL: 3.34E8  
 TF-1-117-40 #91 RT: 0.92 AV: 1 NL:  
 3.34E+008  
 T: FTMS + p ESI Full ms  
 [50.0000-750.0000]

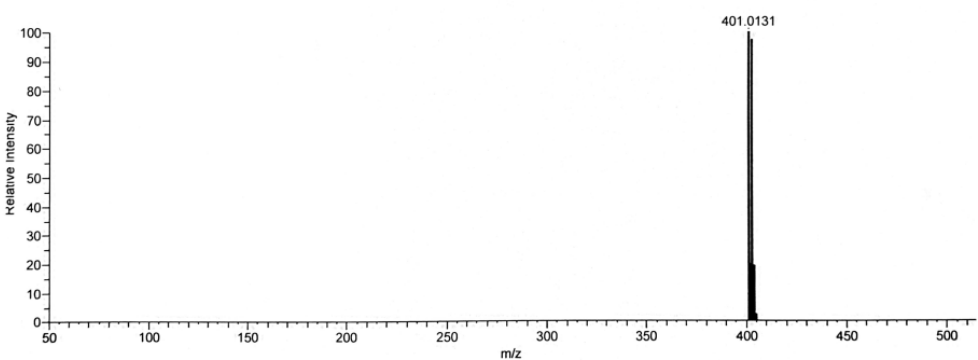

NL: 4.10E5  
 C18H14O4N21Br1 Chrg 1 R: 55406 Res.  
 Pwr: @FWHM

| Index | m/z      | Formula                                                                       | Score | RDB  | Delta ppm | OriginalFormula  | Theo. Mass |
|-------|----------|-------------------------------------------------------------------------------|-------|------|-----------|------------------|------------|
| 1     | 401.0126 | C <sub>18</sub> H <sub>14</sub> O <sub>4</sub> N <sub>2</sub> <sup>1</sup> Br | 100   | 12.5 | -1.28     | C18H14O4N2[79]Br | 401.01315  |

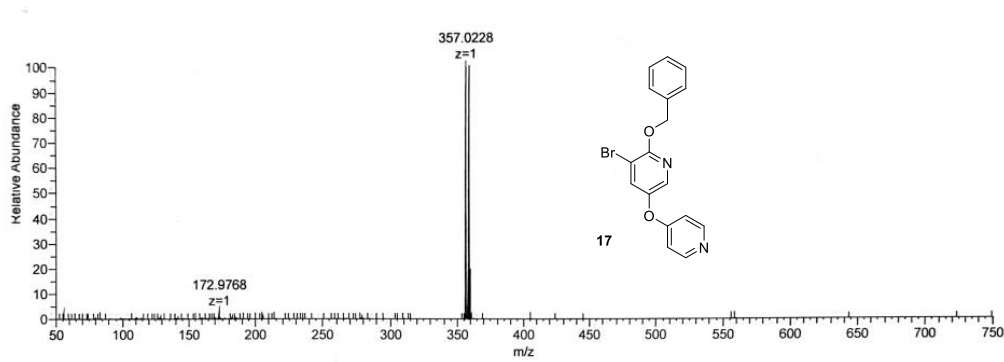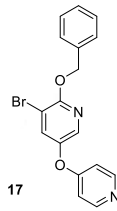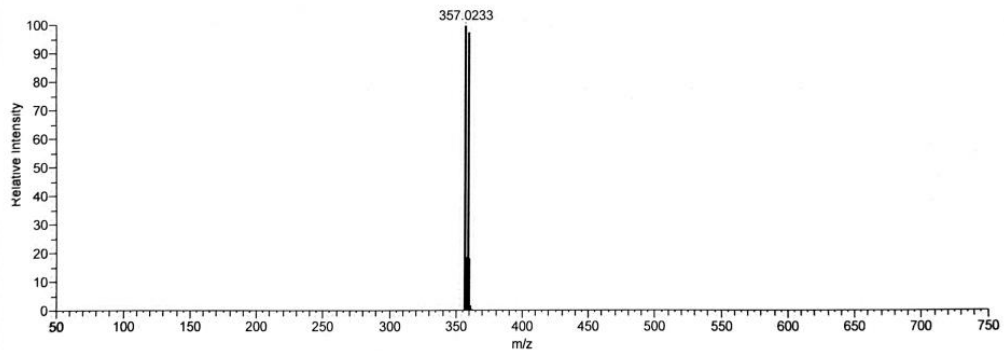

| Index | m/z      | Formula                                                                        | Score | RDB  | Delta ppm | OriginalFormula  | Theo. Mass |
|-------|----------|--------------------------------------------------------------------------------|-------|------|-----------|------------------|------------|
| 1     | 357.0228 | C <sub>17</sub> H <sub>14</sub> O <sub>2</sub> N <sub>2</sub> <sup>79</sup> Br | 100   | 11.5 | -1.46     | C17H14O2N2[79]Br | 357.02332  |

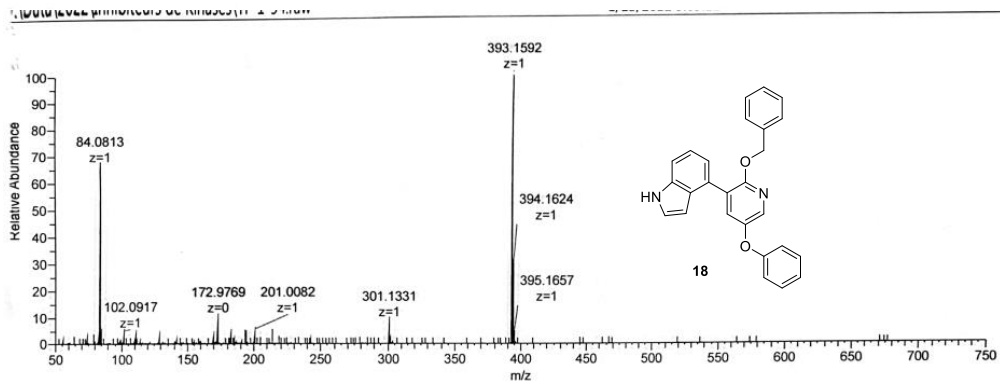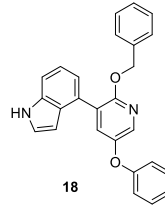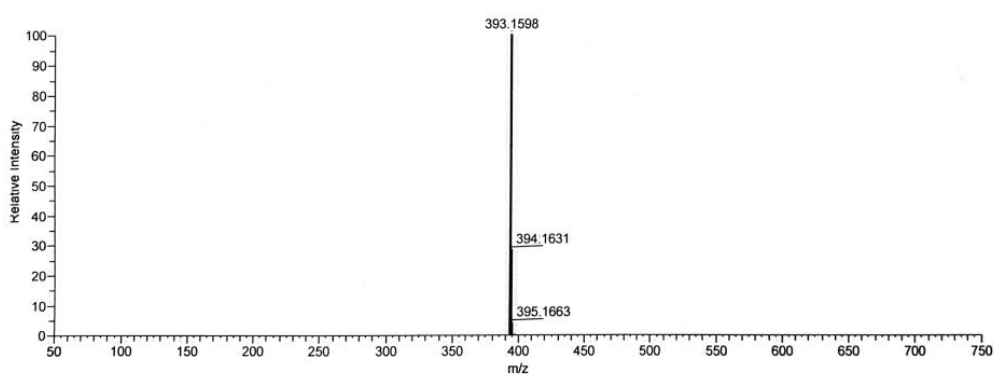

| Index | m/z      | Formula                                                       | Score | RDB  | Delta ppm | OriginalFormula | Theo. Mass |
|-------|----------|---------------------------------------------------------------|-------|------|-----------|-----------------|------------|
| 1     | 393.1592 | C <sub>26</sub> H <sub>21</sub> O <sub>2</sub> N <sub>2</sub> | 100   | 17.5 | -1.31     | C26H21O2N2      | 393.15975  |

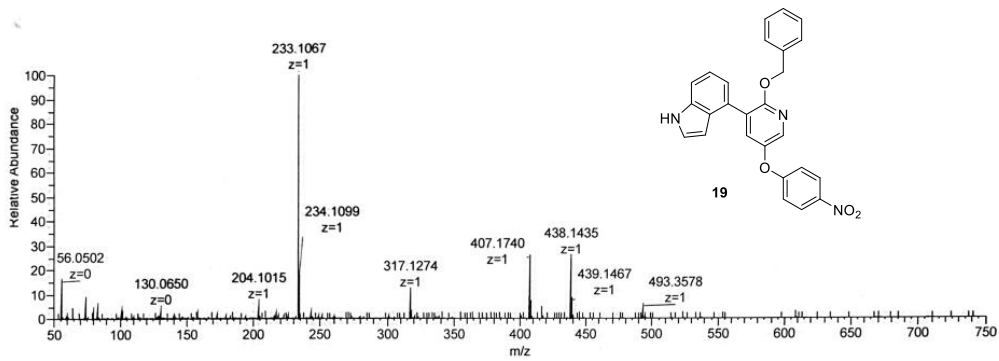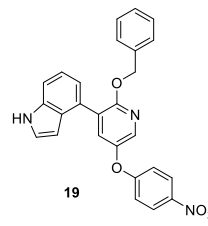

NL: 3.48E8  
 TF-1-12S #95 RT: 0.95 AV: 1 NL:  
 3.48E+008  
 T: FTMS + p ESI Full ms  
 [50.0000-750.0000]

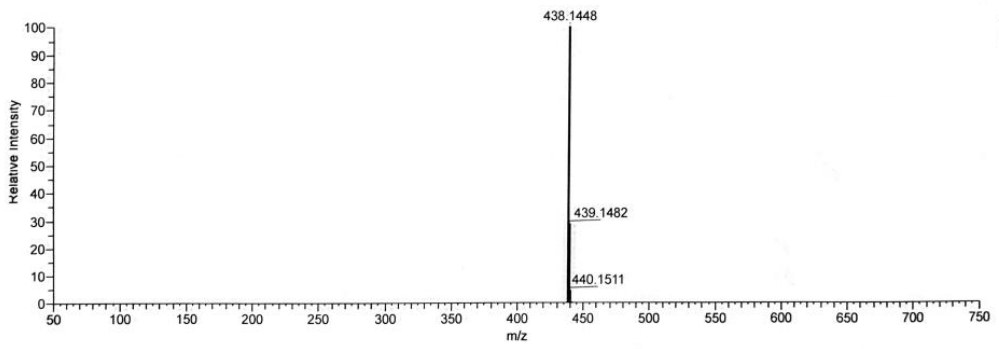

NL: 7.39E5  
 C26H20O4N3 Chrg 1 R: 54107 Res. Pwr.  
 @FWHM

| index | m/z      | Formula                                                       | Score            | RDB  | Delta ppm | OriginalFormula | Theo. Mass |
|-------|----------|---------------------------------------------------------------|------------------|------|-----------|-----------------|------------|
| 1     | 438.1435 | C <sub>26</sub> H <sub>20</sub> O <sub>4</sub> N <sub>3</sub> | 92.0940585297288 | 18.5 | -3.13     | C26H20O4N3      | 438.14483  |

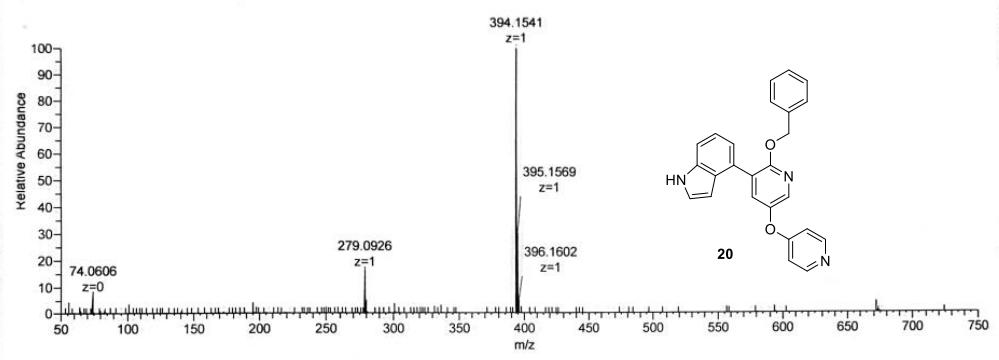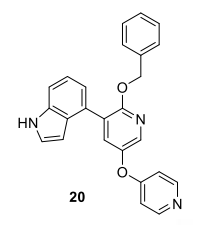

NL: 2.48E9  
 TF-1-131 #105 RT: 1.04 AV: 1 NL:  
 2.48E+009  
 T: FTMS + p ESI Full ms  
 [50.0000-750.0000]

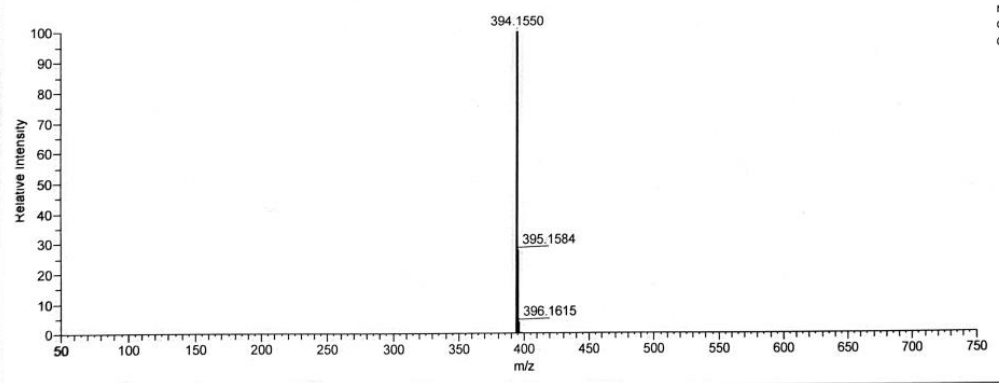

NL: 7.50E5  
 C25H20O2N3 Chrg 1 R: 57707 Res. Pwr.  
 @FWHM

| index | m/z      | Formula                                                       | Score | RDB  | Delta ppm | OriginalFormula | Theo. Mass |
|-------|----------|---------------------------------------------------------------|-------|------|-----------|-----------------|------------|
| 1     | 394.1541 | C <sub>25</sub> H <sub>20</sub> O <sub>2</sub> N <sub>3</sub> | 100   | 17.5 | -2.41     | C25H20O2N3      | 394.15500  |

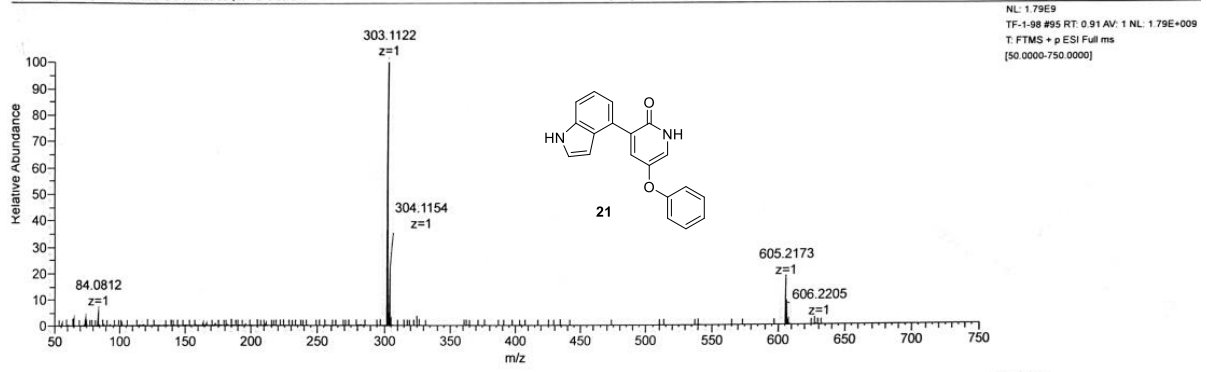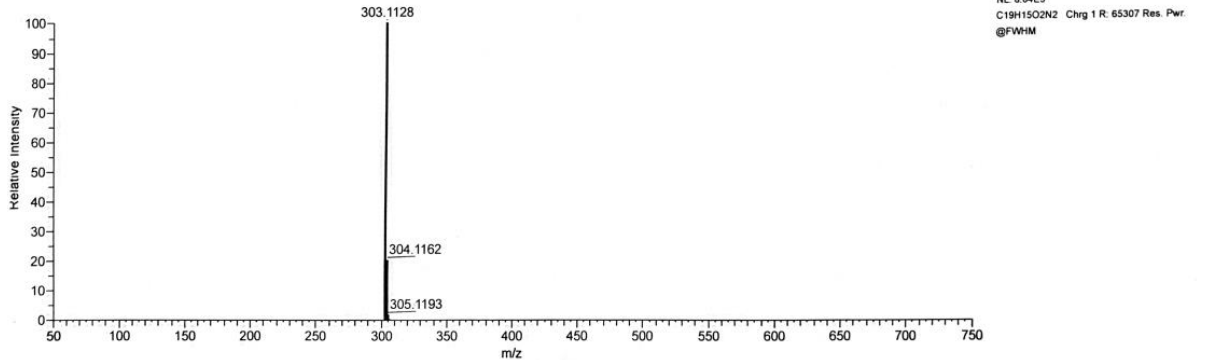

| Index | m/z      | Formula                                                       | Score | RDB  | Delta ppm | OriginalFormula | Theo. Mass |
|-------|----------|---------------------------------------------------------------|-------|------|-----------|-----------------|------------|
| 1     | 303.1122 | C <sub>19</sub> H <sub>15</sub> O <sub>2</sub> N <sub>2</sub> | 100   | 13.5 | -2.05     | C19H15O2N2      | 303.11280  |

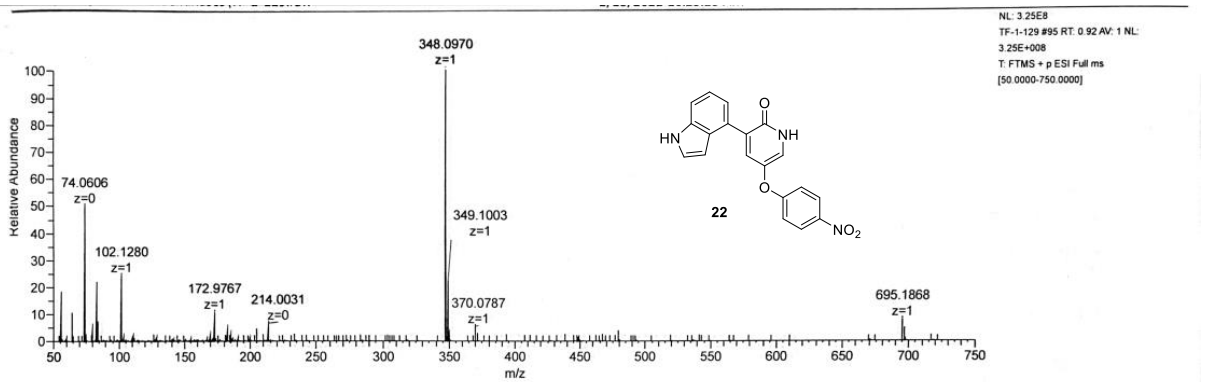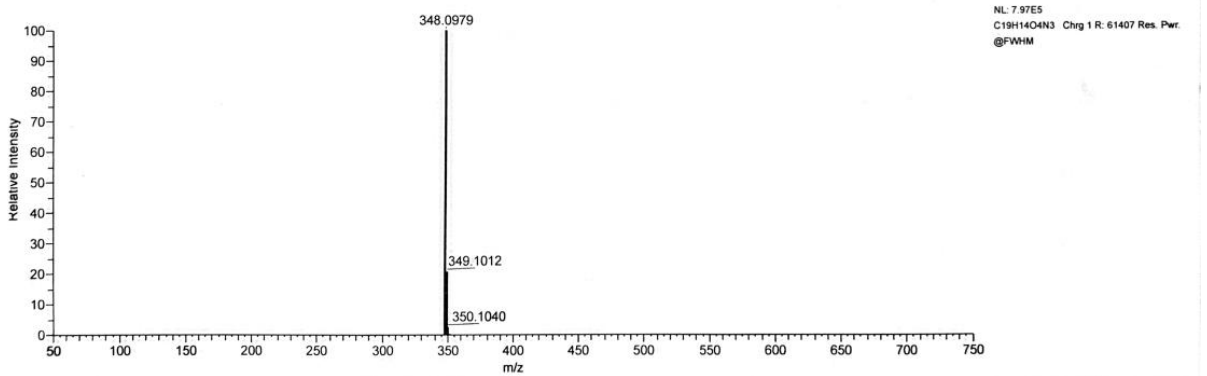

| Index | m/z      | Formula                                                       | Score | RDB  | Delta ppm | OriginalFormula | Theo. Mass |
|-------|----------|---------------------------------------------------------------|-------|------|-----------|-----------------|------------|
| 1     | 348.0970 | C <sub>19</sub> H <sub>14</sub> O <sub>4</sub> N <sub>3</sub> | 100   | 14.5 | -2.49     | C19H14O4N3      | 348.09788  |

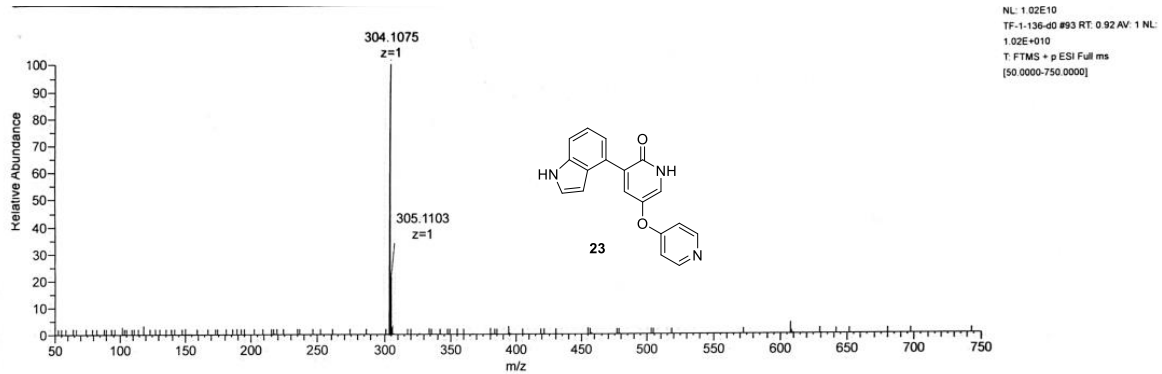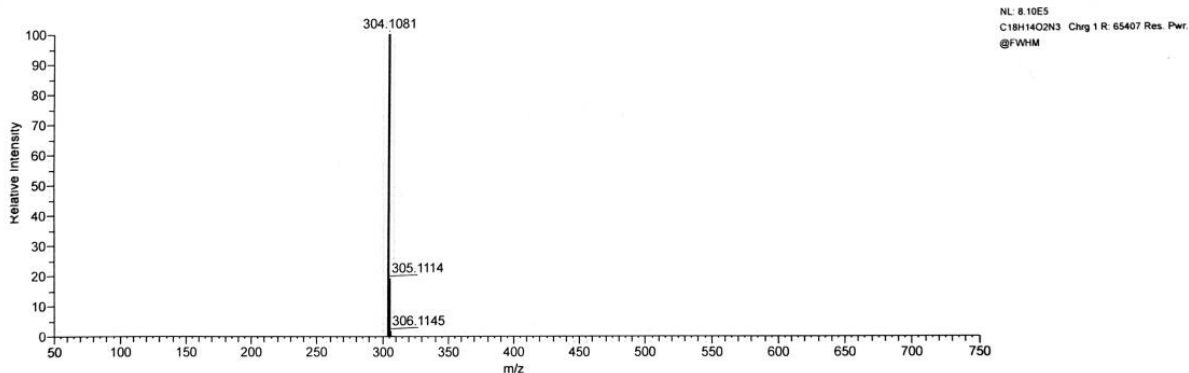

| Index | m/z      | Formula                                                       | Score | RDB  | Delta ppm | OriginalFormula | Theo. Mass |
|-------|----------|---------------------------------------------------------------|-------|------|-----------|-----------------|------------|
| 1     | 304.1075 | C <sub>18</sub> H <sub>14</sub> O <sub>2</sub> N <sub>3</sub> | 100   | 13.5 | -1.98     | C18H14O2N3      | 304.10805  |

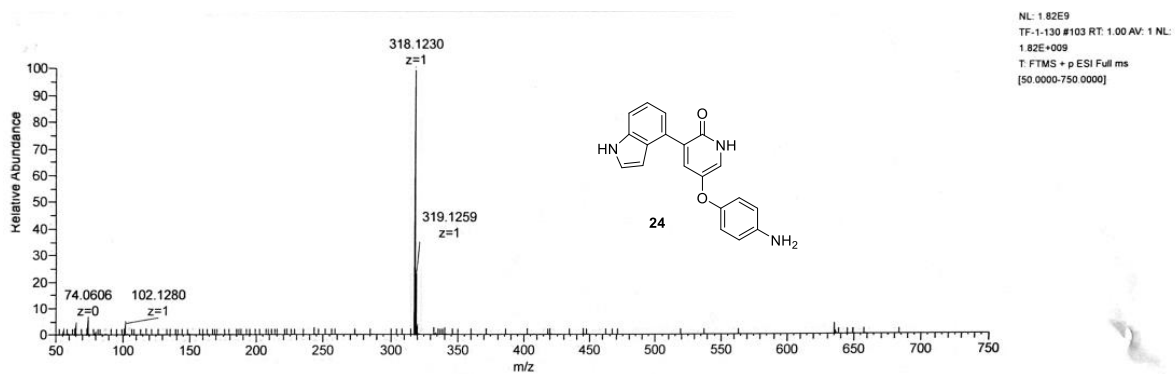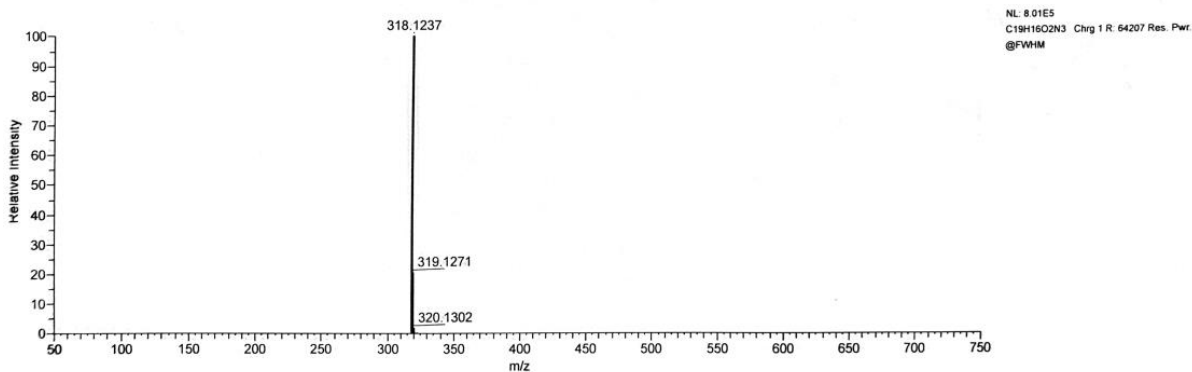

| Index | m/z      | Formula                                                       | Score | RDB  | Delta ppm | OriginalFormula | Theo. Mass |
|-------|----------|---------------------------------------------------------------|-------|------|-----------|-----------------|------------|
| 1     | 318.1230 | C <sub>19</sub> H <sub>16</sub> O <sub>2</sub> N <sub>3</sub> | 100   | 13.5 | -2.16     | C19H16O2N3      | 318.12370  |

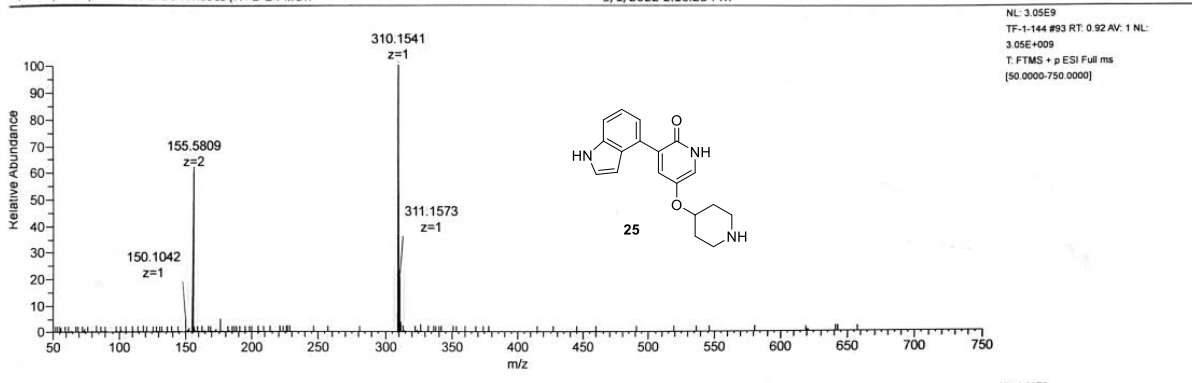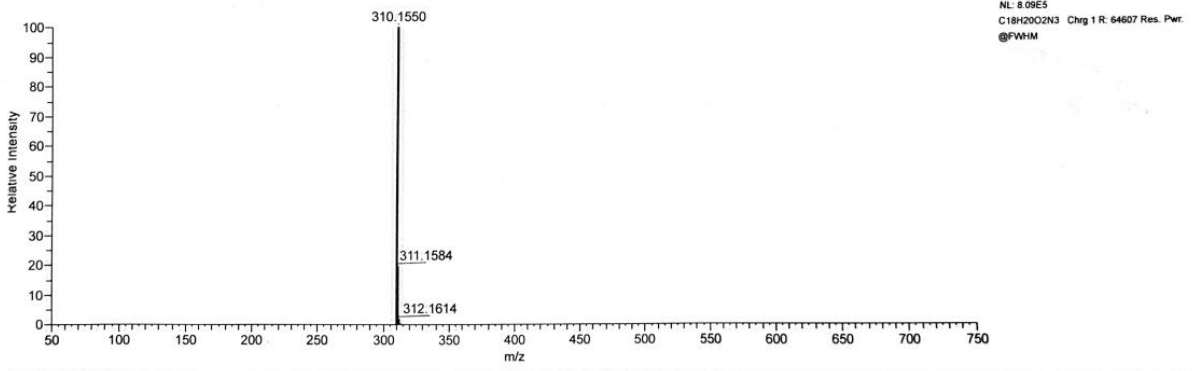

| Index | m/z      | Formula                                                       | Score            | RDB  | Delta ppm | OriginalFormula | Theo. Mass |
|-------|----------|---------------------------------------------------------------|------------------|------|-----------|-----------------|------------|
| 1     | 310.1541 | C <sub>18</sub> H <sub>20</sub> O <sub>2</sub> N <sub>3</sub> | 92.4016783285469 | 10.5 | -3.07     | C18H20O2N3      | 310.15500  |

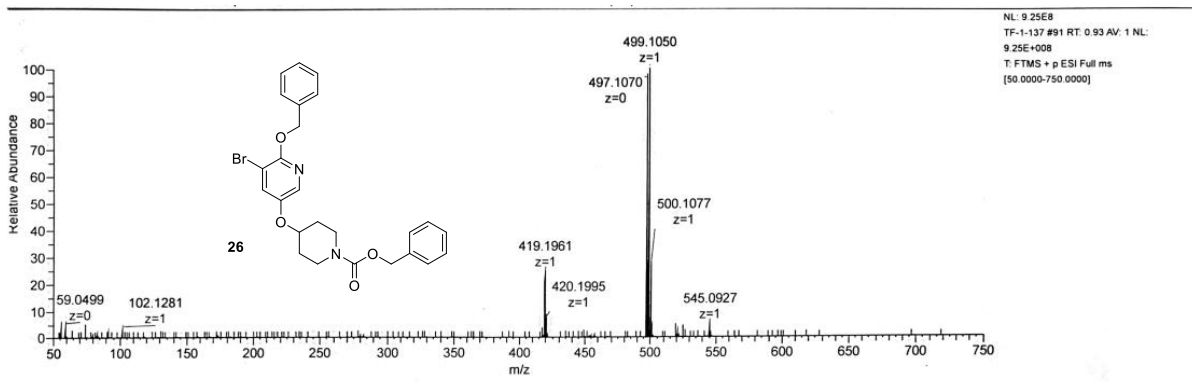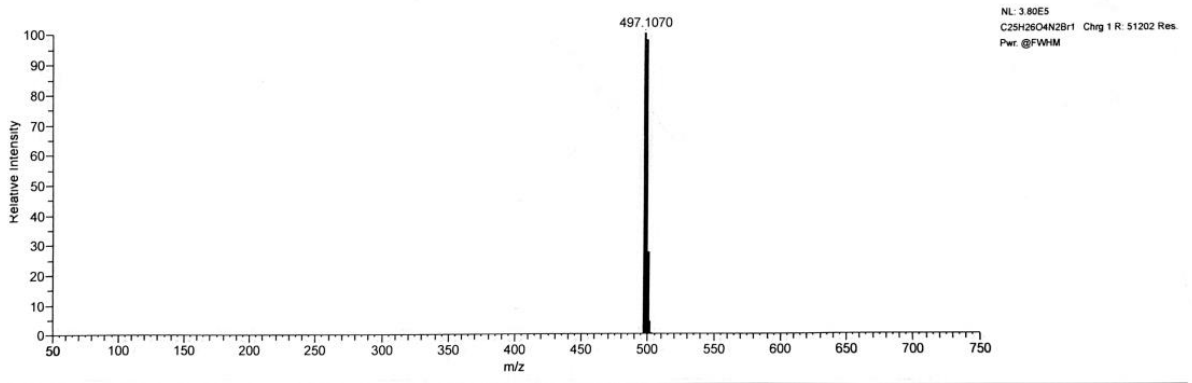

| Index | m/z      | Formula                                                                        | Score | RDB  | Delta ppm | OriginalFormula  | Theo. Mass |
|-------|----------|--------------------------------------------------------------------------------|-------|------|-----------|------------------|------------|
| 1     | 497.1070 | C <sub>25</sub> H <sub>26</sub> O <sub>4</sub> N <sub>2</sub> <sup>79</sup> Br | 100   | 13.5 | -0.17     | C25H26O4N2[79]Br | 497.10705  |

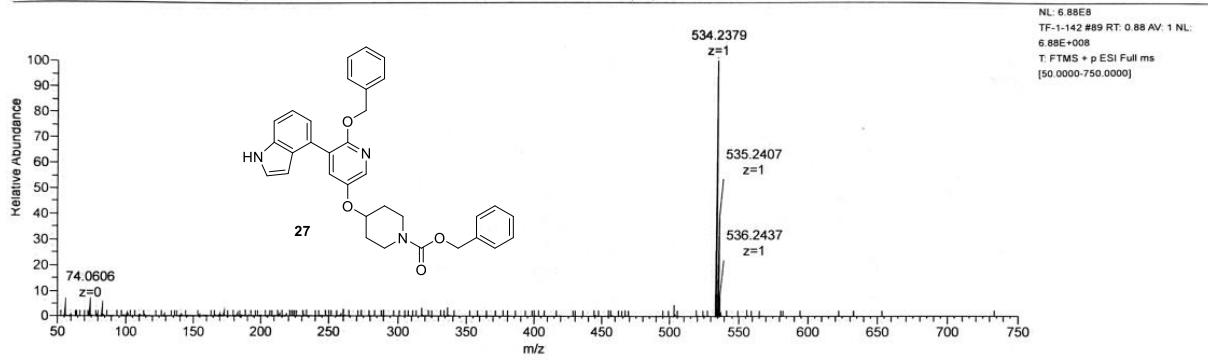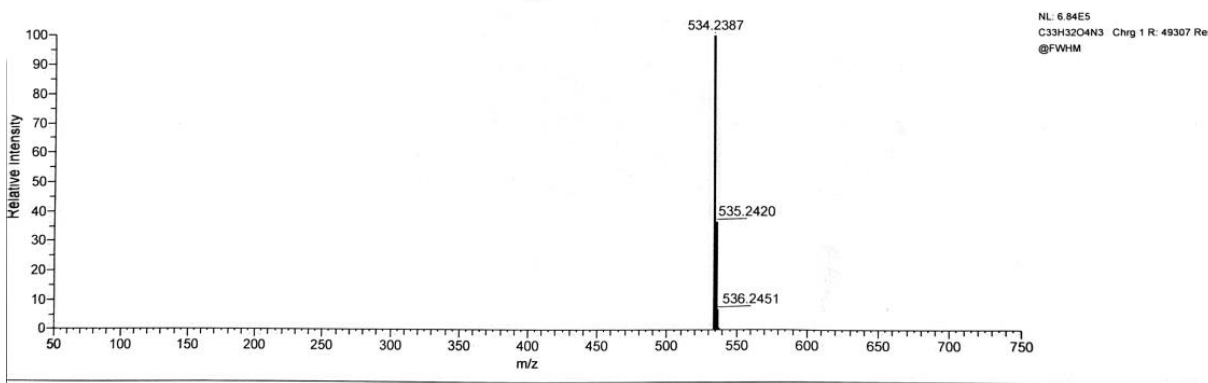

| Index | m/z      | Formula                                                       | Score | RDB  | Delta ppm | OriginalFormula | Theo. Mass |
|-------|----------|---------------------------------------------------------------|-------|------|-----------|-----------------|------------|
| 1     | 534.2379 | C <sub>33</sub> H <sub>32</sub> O <sub>4</sub> N <sub>3</sub> | 100   | 19.5 | -1.65     | C33H32O4N3      | 534.23873  |

NC-016 #89 RT: 0.88 AV: 1 NL: 2.89E9  
T: FTMS + p ESI Full ms [50.0000-750.0000]

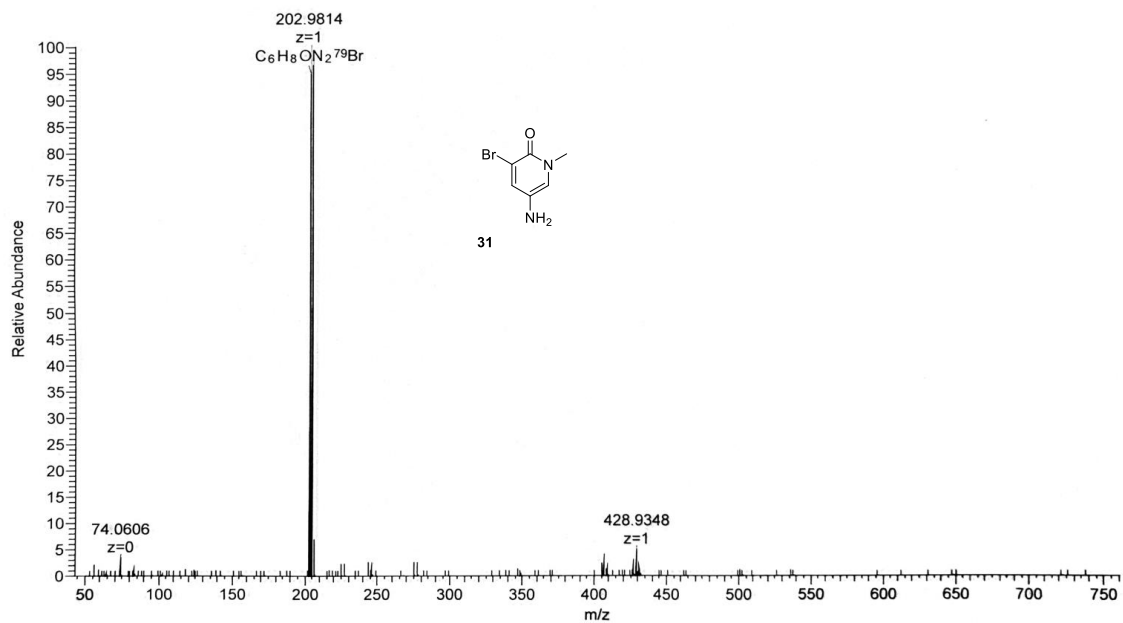

| Peak Mass | Display Formula                                                | Delta [ppm] | Theo. mass | Combined Score | Pattern Cov. [%] | MSMS Matched Fragments |
|-----------|----------------------------------------------------------------|-------------|------------|----------------|------------------|------------------------|
| 202.9814  | C <sub>6</sub> H <sub>8</sub> ON <sub>2</sub> <sup>79</sup> Br | -0.48       | 202.98145  | 96.54          | 99.7             | (Collection)           |



NC-023 #131 RT: 1.32 AV: 1 NL: 3.24E9  
T: FTMS + p ESI Full ms [50.0000-750.0000]

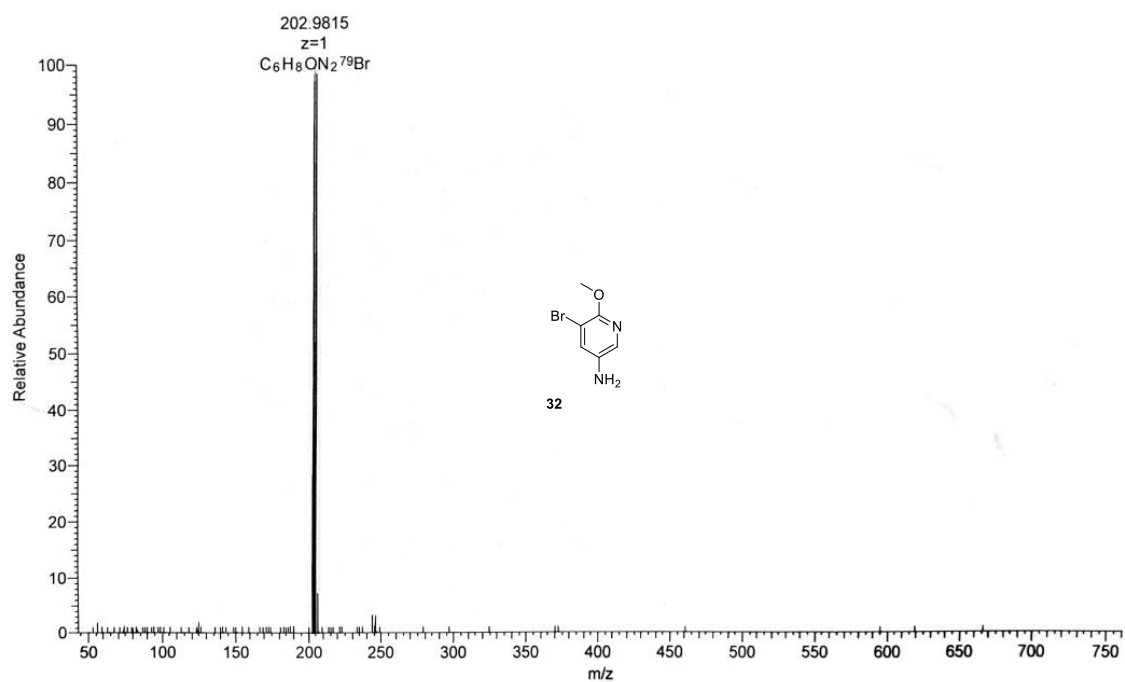

| Peak Mass | Display Formula                                                | Delta [ppm] | Theo. mass | Combined Score | Pattern Cov. [%] | MSMS Matched Fragments (Collection) |
|-----------|----------------------------------------------------------------|-------------|------------|----------------|------------------|-------------------------------------|
| 202.9815  | C <sub>6</sub> H <sub>8</sub> ON <sub>2</sub> <sup>79</sup> Br | 0.12        | 202.98145  | 96.11          | 99.61            |                                     |

NC-020 #89 RT: 0.87 AV: 1 NL: 3.19E9  
T: FTMS + p ESI Full ms [50.0000-750.0000]

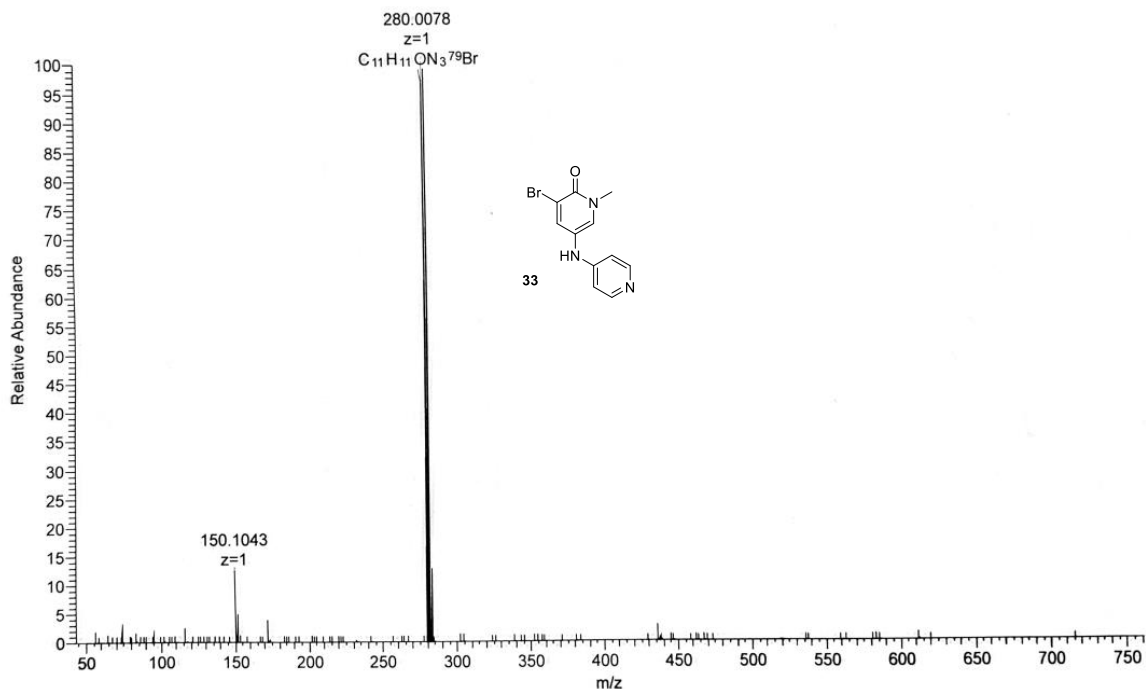

| Peak Mass | Display Formula                                                  | Delta [ppm] | Theo. mass | Combined Score | Pattern Cov. [%] | MSMS Matched Fragment |
|-----------|------------------------------------------------------------------|-------------|------------|----------------|------------------|-----------------------|
| 280.0078  | C <sub>11</sub> H <sub>11</sub> ON <sub>3</sub> <sup>79</sup> Br | -0.56       | 280.00800  | 96.15          | 98.68            | (Collection)          |

NC-024 #175 RT: 1.73 AV: 1 NL: 2.05E9  
 T: FTMS + p ESI Full ms [50.0000-750.0000]

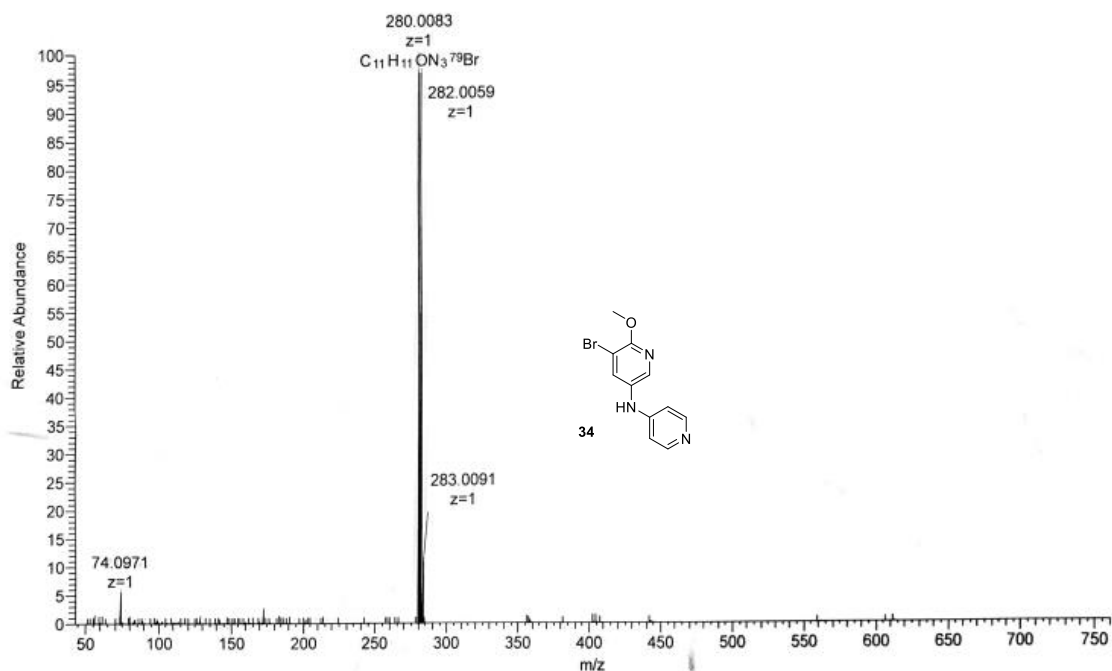

| Peak Mass | Display Formula                                                  | Delta (ppm) | Theo. mass | Combined Score | Pattern Cov. (%) | MSMS Matched Fragments (Collection) |
|-----------|------------------------------------------------------------------|-------------|------------|----------------|------------------|-------------------------------------|
| 280.0083  | C <sub>11</sub> H <sub>11</sub> ON <sub>3</sub> <sup>79</sup> Br | 1.07        | 280.00800  | 96.57          | 98.68            |                                     |

NC-021 #93 RT: 0.92 AV: 1 NL: 4.25E9  
 T: FTMS + p ESI Full ms [50.0000-750.0000]

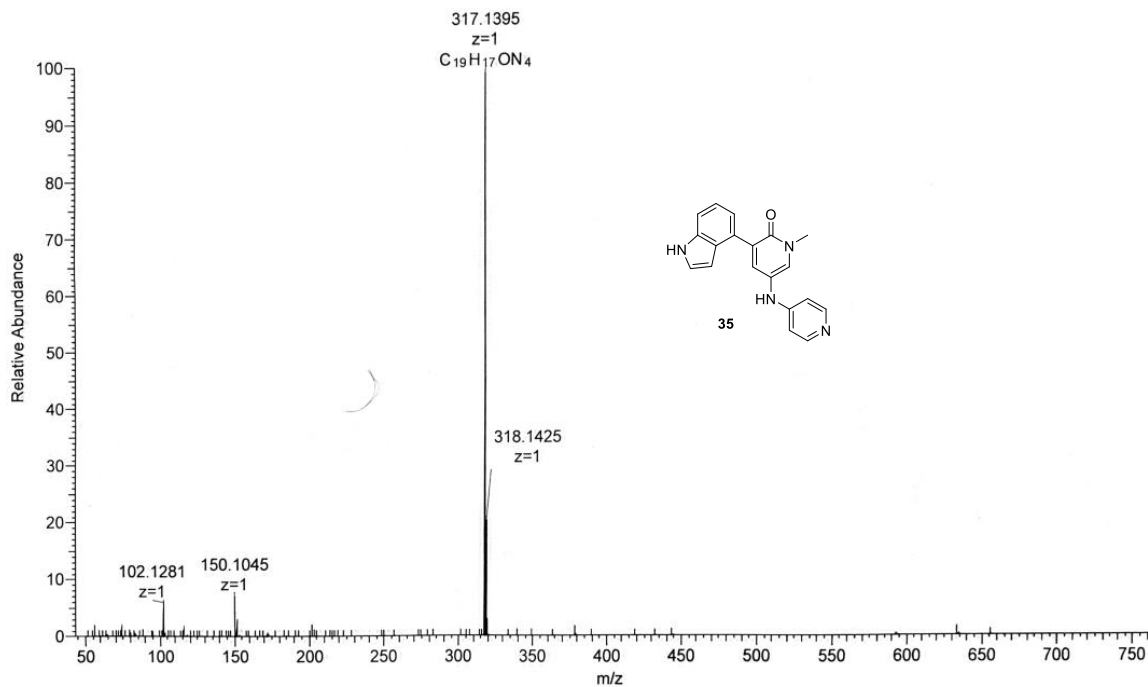

| Peak Mass | Display Formula                                 | Delta (ppm) | Theo. mass | Combined Score | Pattern Cov. (%) | MSMS Matched Fragments (Collection) |
|-----------|-------------------------------------------------|-------------|------------|----------------|------------------|-------------------------------------|
| 317.1395  | C <sub>19</sub> H <sub>17</sub> ON <sub>4</sub> | -0.51       | 317.13969  | 98.37          | 100              |                                     |

NC-027 #93 RT: 0.91 AV: 1 NL: 5.37E9  
 T: FTMS + p ESI Full ms [50.0000-750.0000]

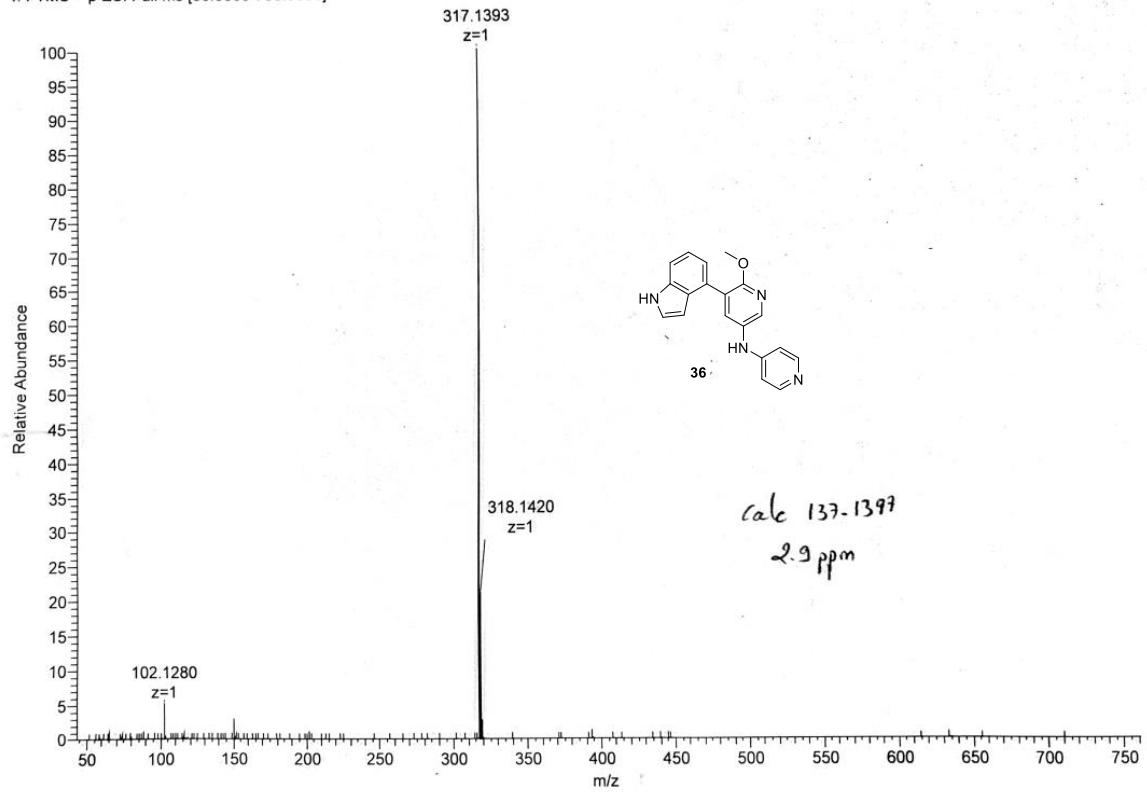

TF-2-202 #93 RT: 0.91 AV: 1 NL: 4.14E9  
 T: FTMS + p ESI Full ms [50.0000-750.0000]

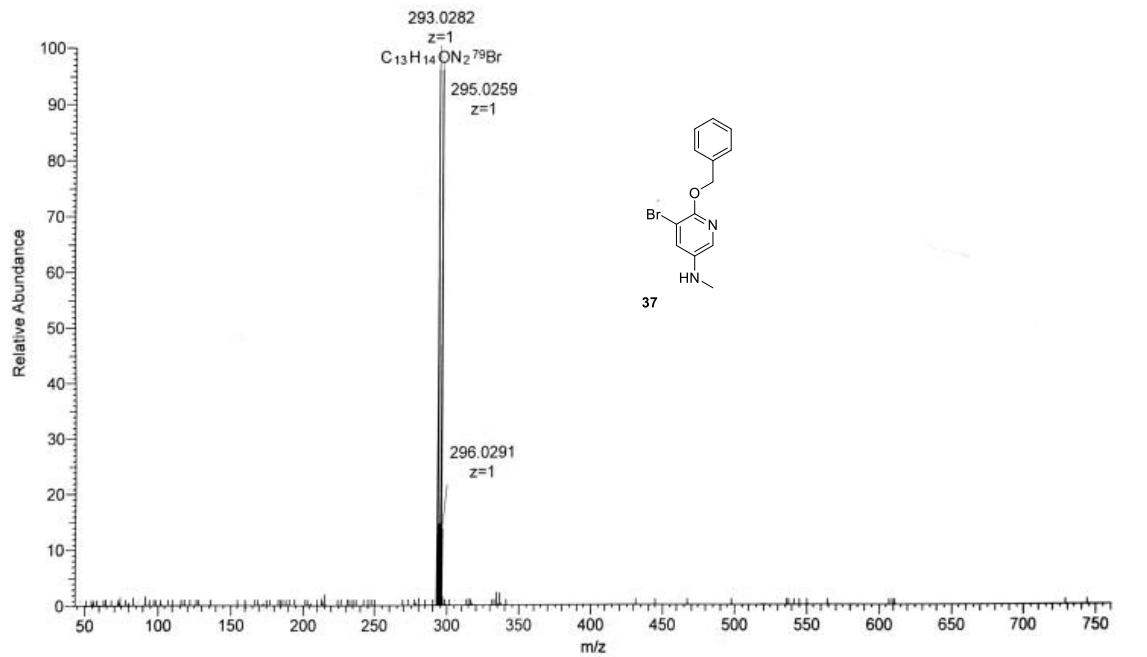

| Peak Mass | Display Formula                                                  | Delta [ppm] | Theo. mass | Combined Score | Pattern Cov. [%] | MSMS Matched Fragments |
|-----------|------------------------------------------------------------------|-------------|------------|----------------|------------------|------------------------|
| 293.0282  | C <sub>13</sub> H <sub>14</sub> ON <sub>2</sub> <sup>79</sup> Br | -0.59       | 293.02840  | 97.49          | 99.55            | (Collection)           |

TF-2-204 #91 RT: 0.90 AV: 1 NL: 6.30E9  
 T: FTMS + p ESI Full ms [50.0000-750.0000]

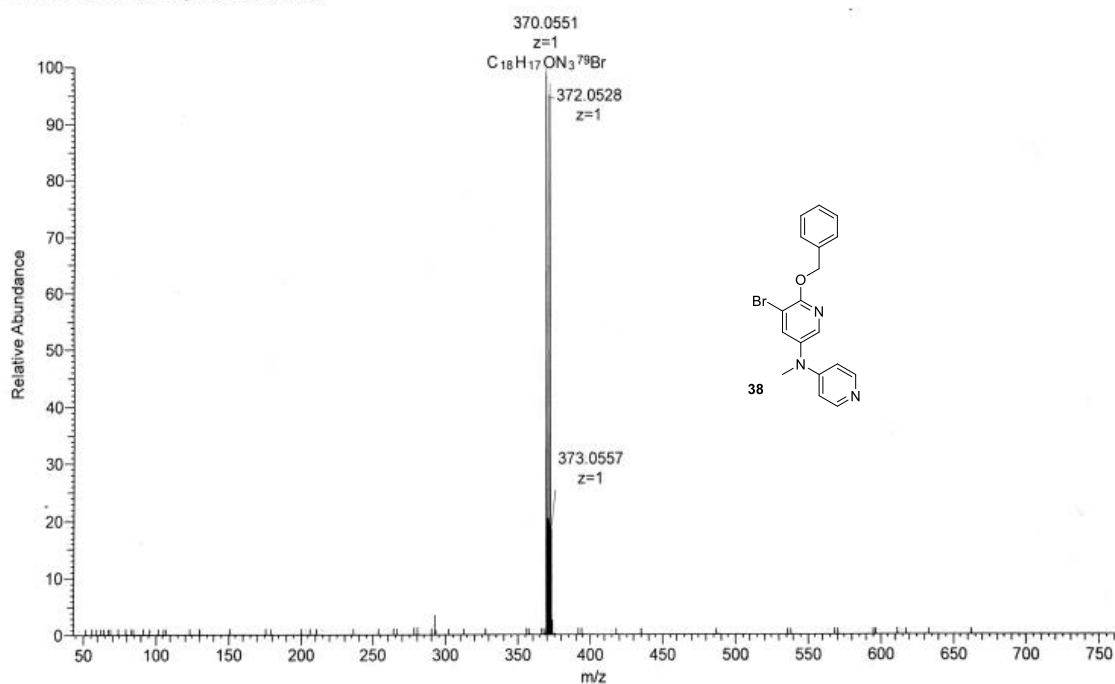

| Peak Mass | Display Formula                                                  | Delta [ppm] | Theo. mass | Combined Score | Pattern Cov. [%] | MSMS Matched Fragments (Collection) |
|-----------|------------------------------------------------------------------|-------------|------------|----------------|------------------|-------------------------------------|
| 370.0551  | C <sub>18</sub> H <sub>17</sub> ON <sub>3</sub> <sup>79</sup> Br | 0.28        | 370.05495  | 98.81          | 100              |                                     |

TF-2-205 #199 RT: 1.97 AV: 1 NL: 8.45E8  
 T: FTMS + p ESI Full ms [50.0000-750.0000]

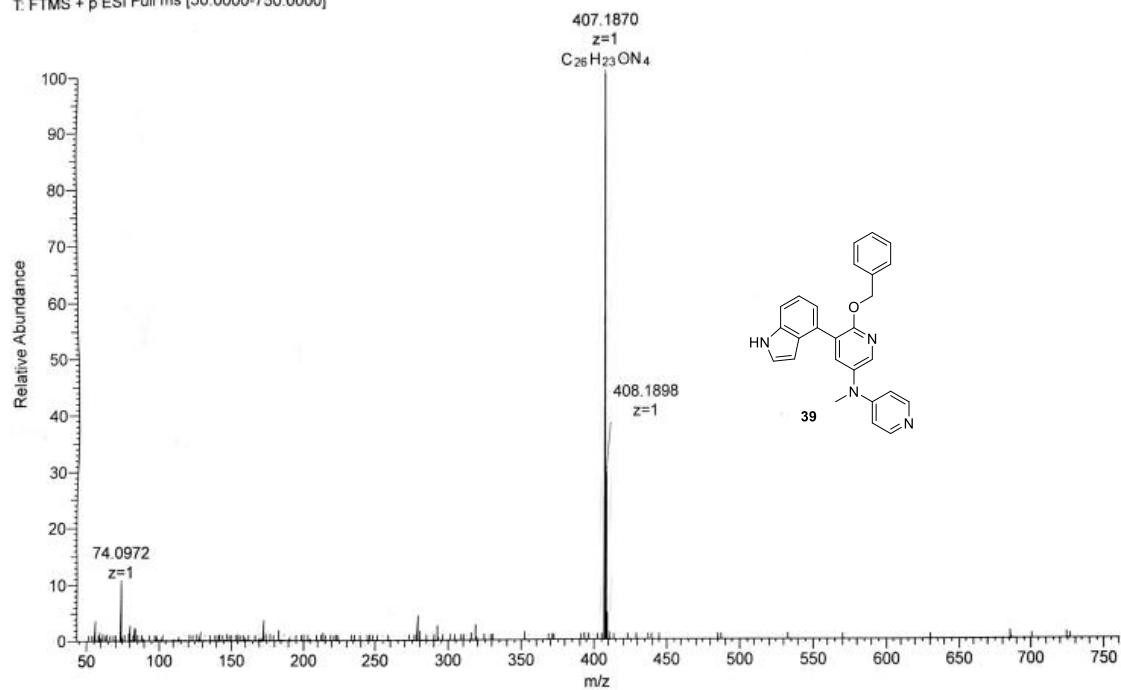

| Peak Mass | Display Formula                                 | Delta [ppm] | Theo. mass | Combined Score | Pattern Cov. [%] | MSMS Matched Fragments (Collection) |
|-----------|-------------------------------------------------|-------------|------------|----------------|------------------|-------------------------------------|
| 407.1870  | C <sub>26</sub> H <sub>23</sub> ON <sub>4</sub> | 0.92        | 407.18664  | 98.41          | 100              |                                     |

NC-026 #93 RT: 0.91 AV: 1 NL: 1.91E9  
 T: FTMS + p ESI Full ms [50.0000-750.0000]

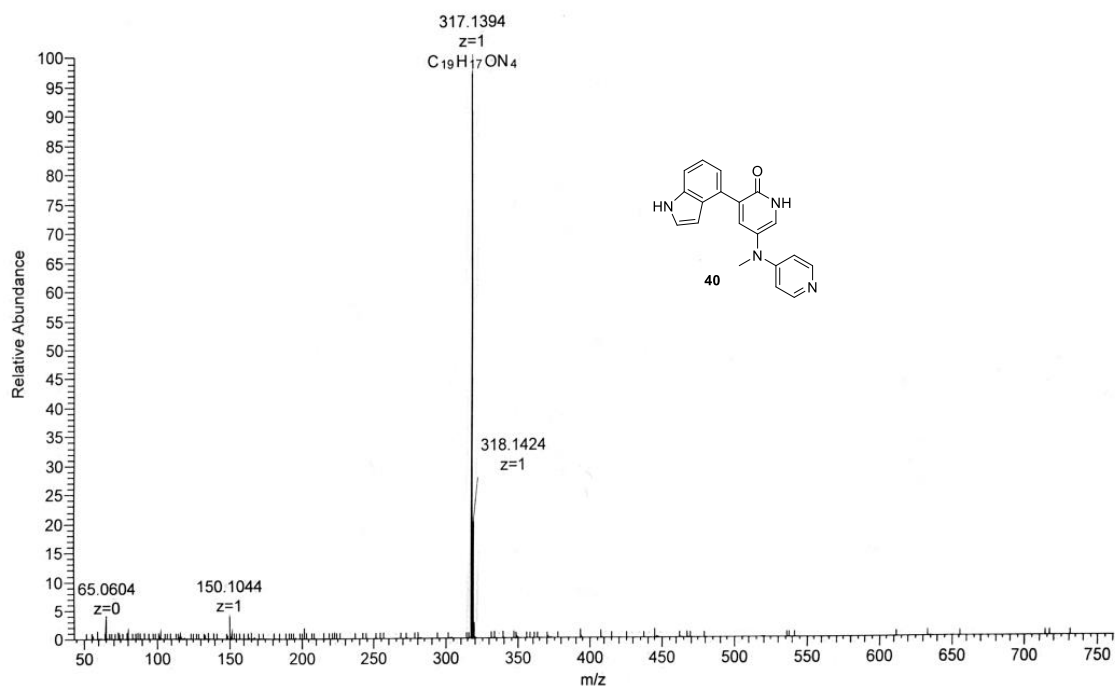

| Peak Mass | Display Formula                                 | Delta [ppm] | Theo. mass | Combined Score | Pattern Cov. [%] | MSMS Matched Fragments (Collection) |
|-----------|-------------------------------------------------|-------------|------------|----------------|------------------|-------------------------------------|
| 317.1394  | C <sub>19</sub> H <sub>17</sub> ON <sub>4</sub> | -0.89       | 317.13969  | 98.68          | 100              |                                     |

2

AB-1-158 #93 RT: 0.90 AV: 1 NL: 2.19E9  
 T: FTMS + p ESI Full ms [50.0000-750.0000]

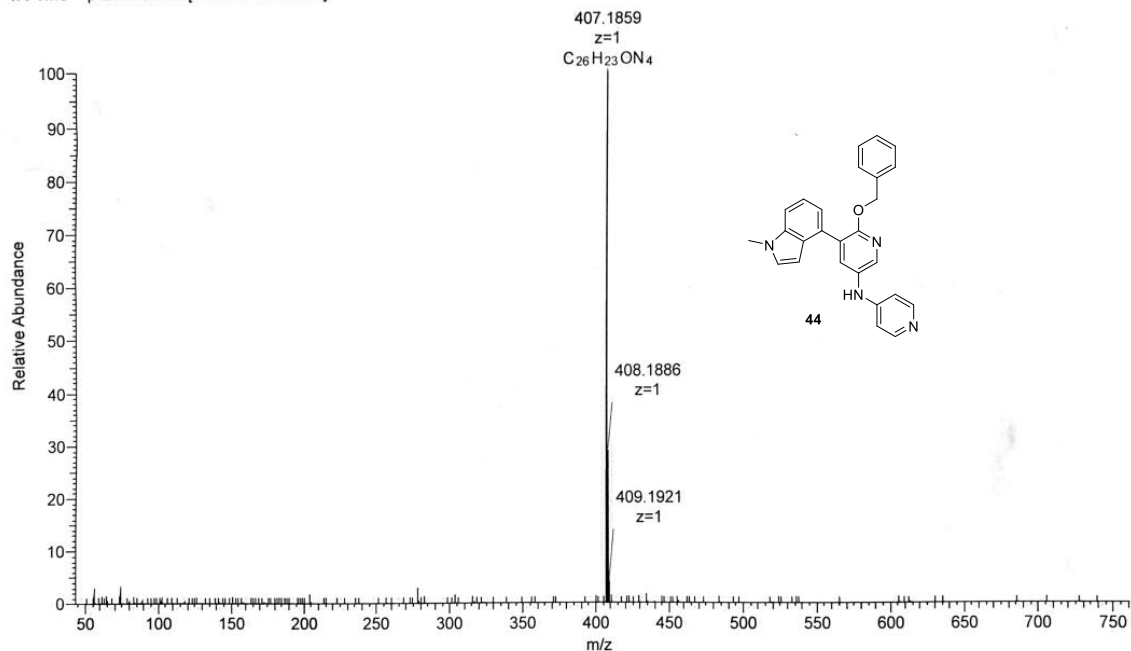

| Rank | Peak Mass | Display Formula                                 | RDB   | Combined Score | Delta [ppm] | Theo. mass | MSMS Matched Fragm... |
|------|-----------|-------------------------------------------------|-------|----------------|-------------|------------|-----------------------|
| 1    | 407.1859  | C <sub>26</sub> H <sub>23</sub> ON <sub>4</sub> | 17.50 | 98.07          | -1.93       | 407.18664  | (Collection)          |

TF-1-184 #95 RT: 0.92 AV: 1 NL: 1.70E9  
 T: FTMS + p ESI Full ms [50.0000-750.0000]

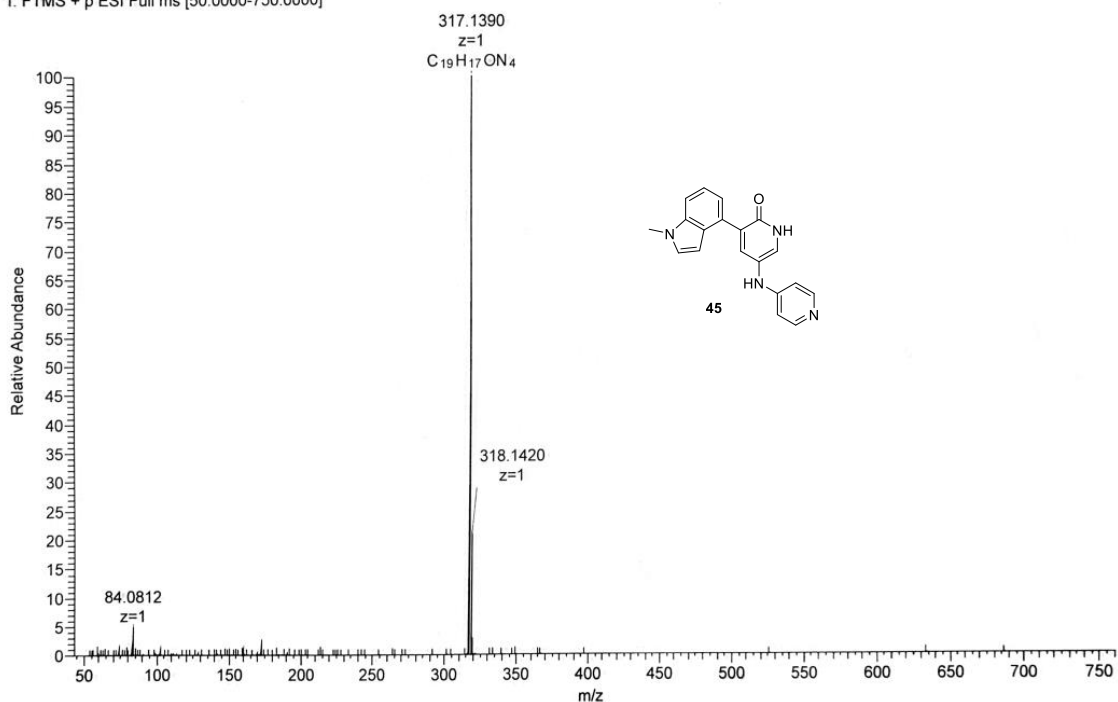

| Peak Mass | Display Formula                                 | Delta [ppm] | Theo. mass | Combined Score | Pattern Cov. [%] | MSMS Matched Fragments (Collection) |
|-----------|-------------------------------------------------|-------------|------------|----------------|------------------|-------------------------------------|
| 317.1390  | C <sub>19</sub> H <sub>17</sub> ON <sub>4</sub> | -2.24       | 317.13969  | 97.53          | 100              |                                     |

TF-1-161 #85 RT: 0.83 AV: 1 NL: 7.37E7  
 T: FTMS + p ESI Full ms [50.0000-750.0000]

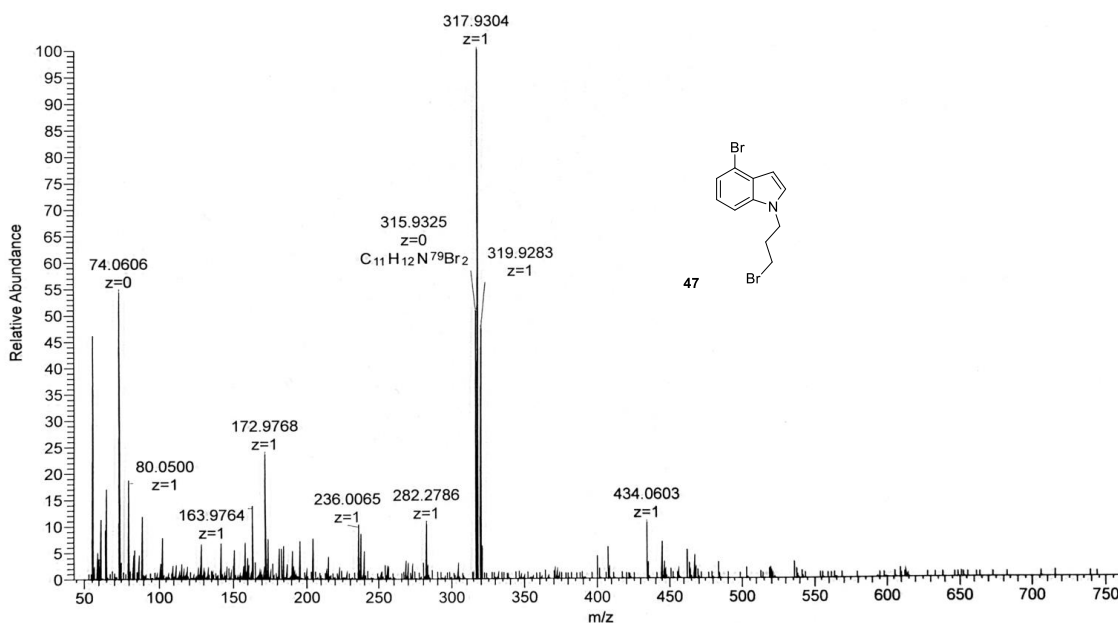

| Rank | Peak Mass | Display Formula                                                 | RDB  | Combined Score | Delta [ppm] | Theo. mass | MSMS Matched Fragments (Collection) |
|------|-----------|-----------------------------------------------------------------|------|----------------|-------------|------------|-------------------------------------|
| 1    | 315.9325  | C <sub>11</sub> H <sub>12</sub> N <sup>79</sup> Br <sub>2</sub> | 5.50 | 95.53          | -1.92       | 315.93310  |                                     |

TF-1-179 #91 RT: 0.88 AV: 1 NL: 2.76E8  
 T: FTMS + p ESI Full ms [50.0000-750.0000]

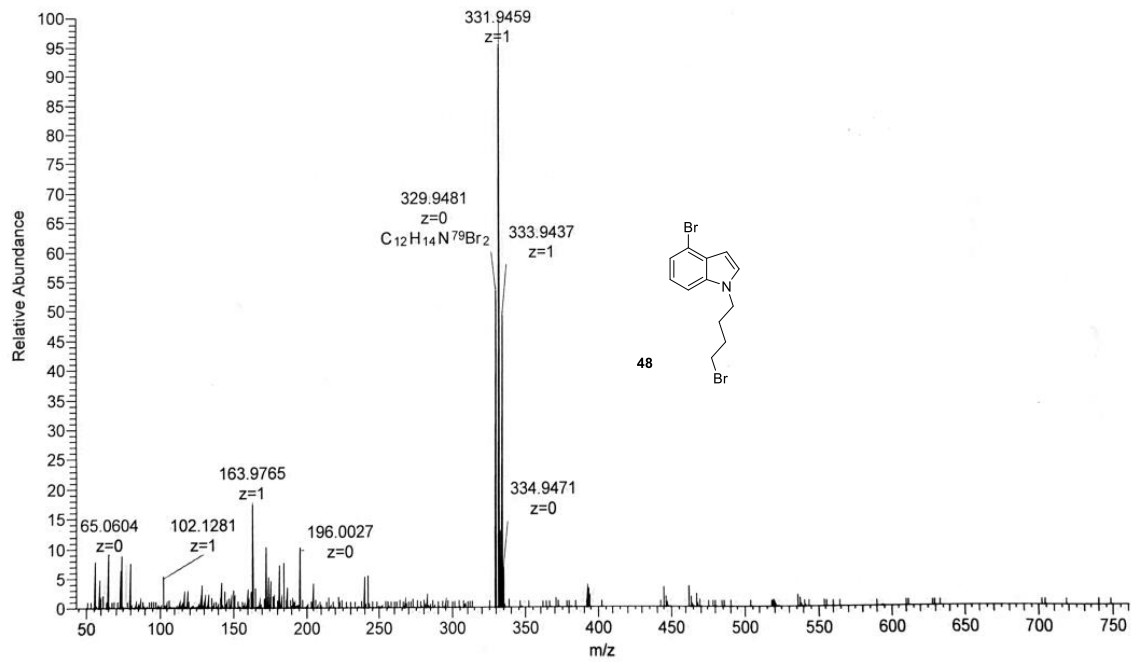

| Peak Mass | Display Formula                                                 | Delta [ppm] | Theo. mass | Combined Score | Pattern Cov. [%] | MSMS Matched Fragments (Collection) |
|-----------|-----------------------------------------------------------------|-------------|------------|----------------|------------------|-------------------------------------|
| 329.9481  | C <sub>12</sub> H <sub>14</sub> N <sup>79</sup> Br <sub>2</sub> | -2.01       | 329.94875  | 96.33          | 100              |                                     |

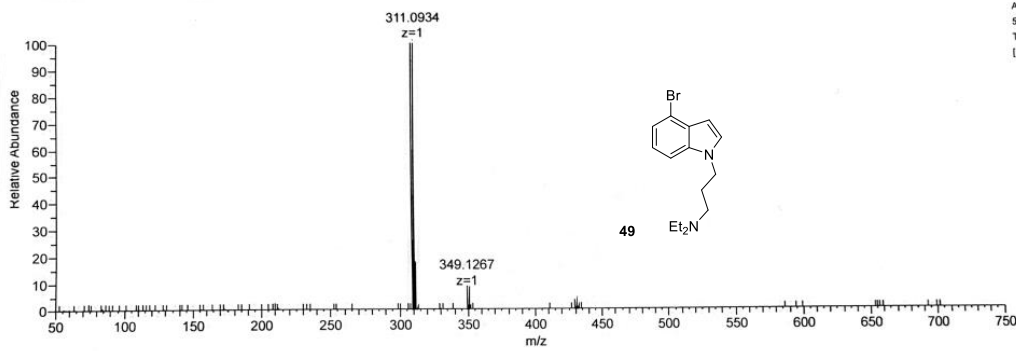

NL: 5.20E9  
 AB-1-112 #55 RT: 0.57 AV: 1 NL:  
 5.20E+009  
 T: FTMS + p ESI Full ms  
 [50.0000-750.0000]

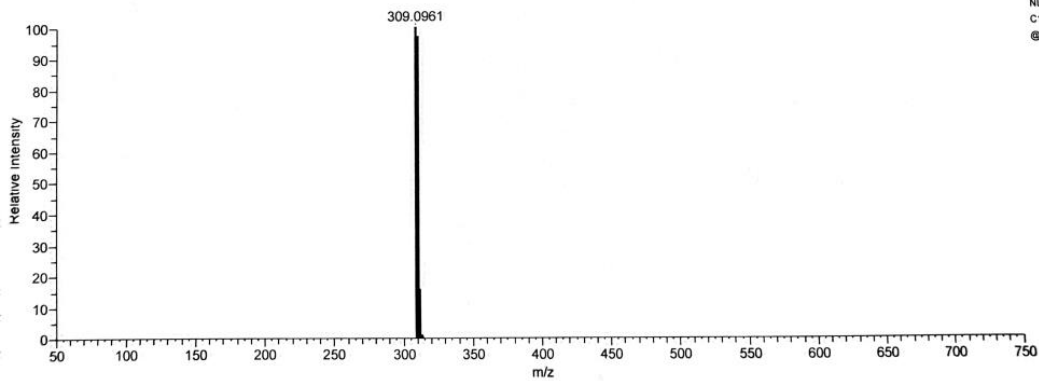

NL: 4.27E5  
 C15H22N2Br1 Chrg 1 R: 65206 Res. P1  
 @FWHM

| index | m/z      | Formula                                                         | Score | RDB | Delta ppm | OriginalFormula | Theo. Mass |
|-------|----------|-----------------------------------------------------------------|-------|-----|-----------|-----------------|------------|
| 1     | 309.0958 | C <sub>15</sub> H <sub>22</sub> N <sub>2</sub> <sup>79</sup> Br | 100   | 5.5 | -0.85     | C15H22N2[79]Br  | 309.09609  |

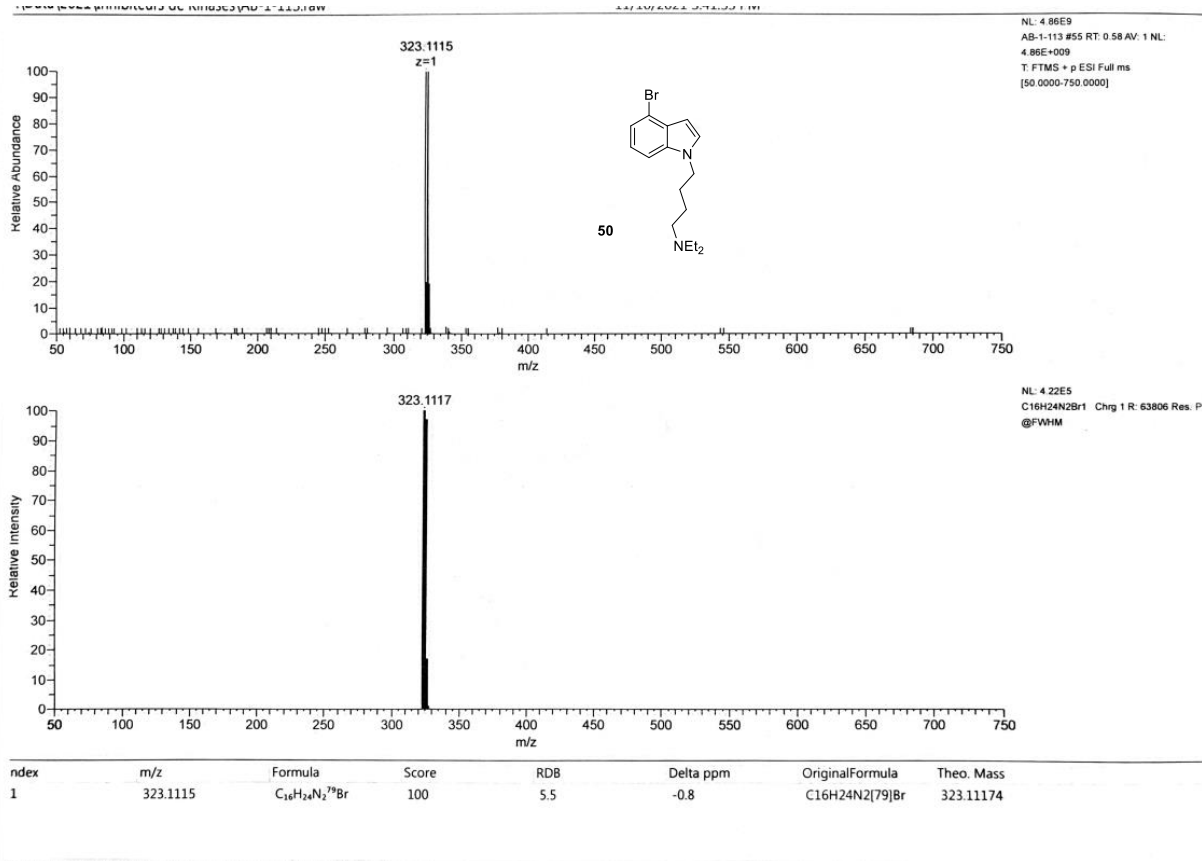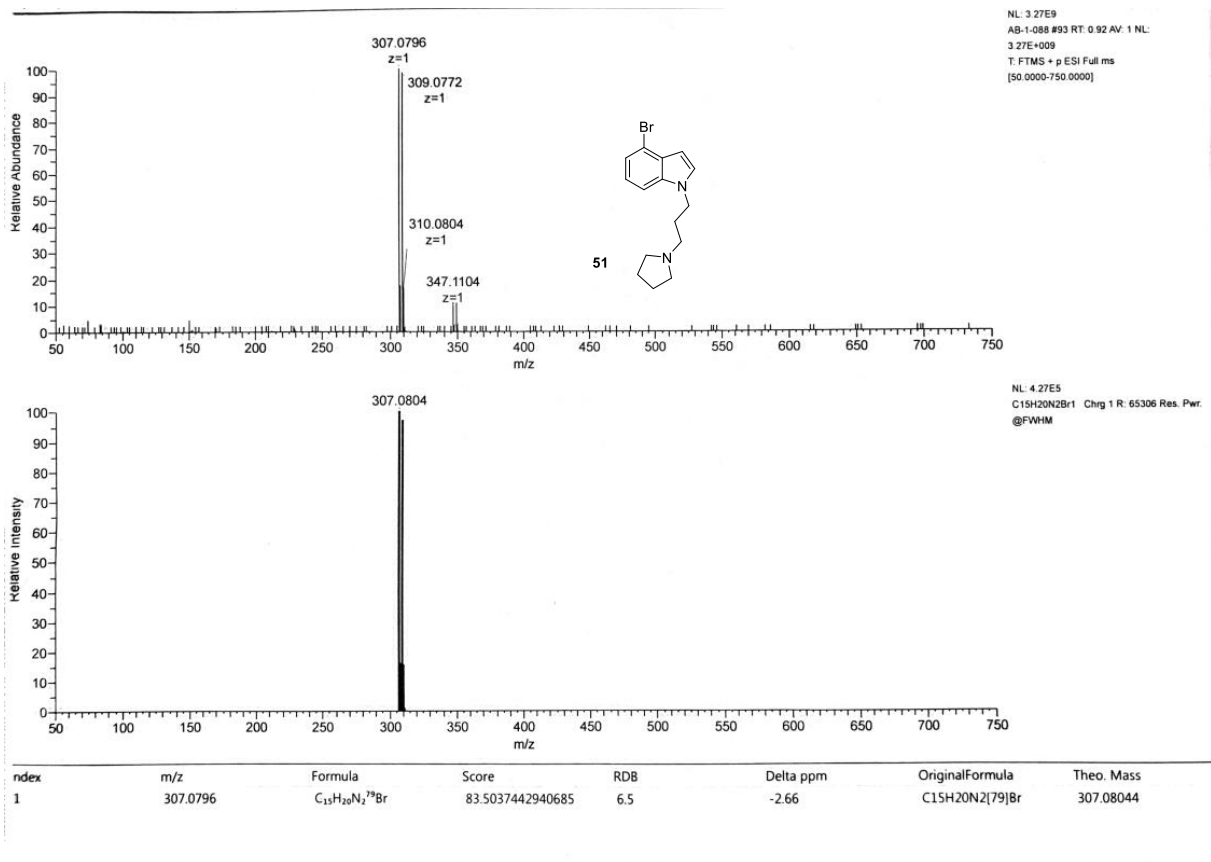



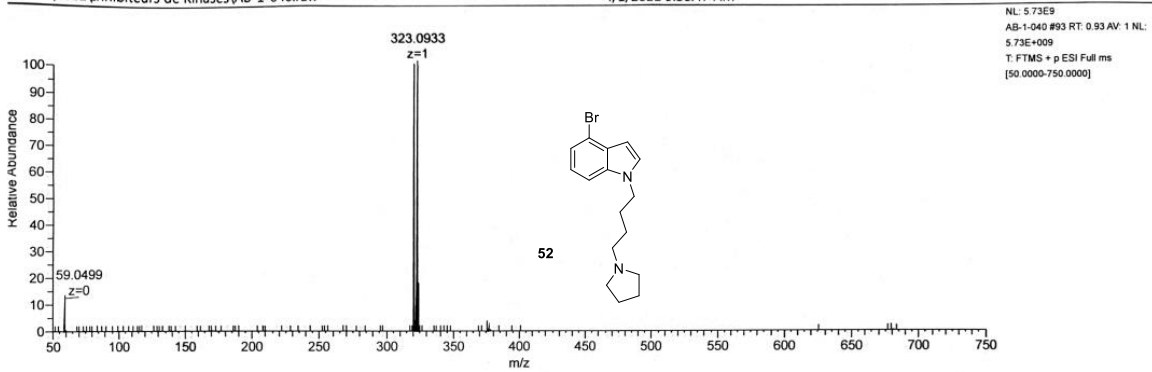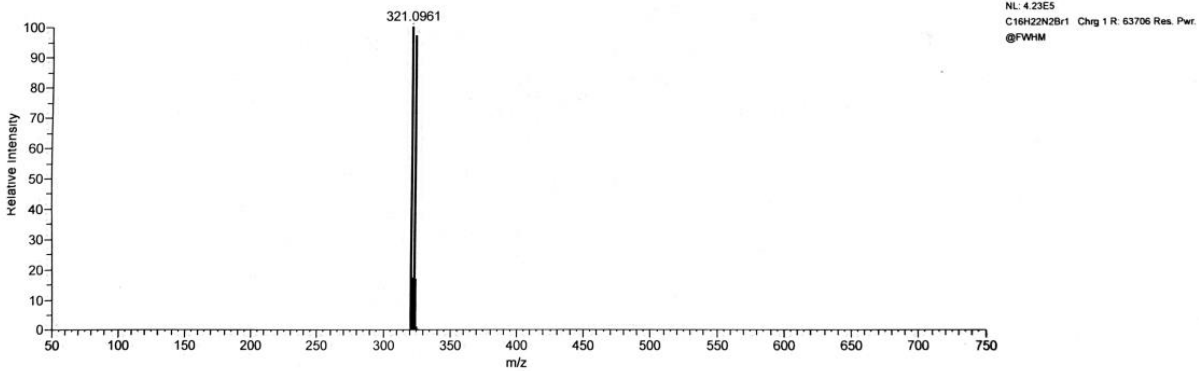

| index | m/z      | Formula                                                         | Score | RDB | Delta ppm | OriginalFormula                                       | Theo. Mass |
|-------|----------|-----------------------------------------------------------------|-------|-----|-----------|-------------------------------------------------------|------------|
| 1     | 321.0957 | C <sub>16</sub> H <sub>22</sub> N <sub>2</sub> <sup>79</sup> Br | 100   | 6.5 | -1.29     | C <sub>16</sub> H <sub>22</sub> N <sub>2</sub> [79]Br | 321.09609  |

TF-1-162 #91 RT: 0.91 AV: 1 NL: 2.13E9  
 T: FTMS + p ESI Full ms [50.0000-750.0000]

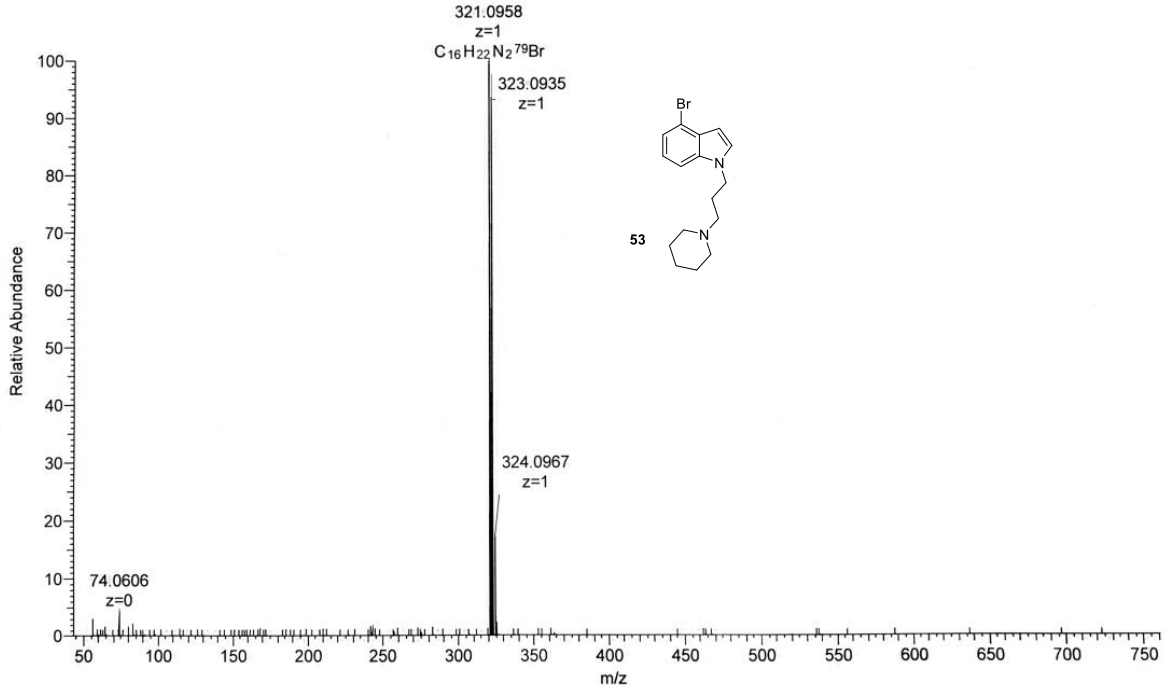

| Rank | Peak Mass | Display Formula                                                 | RDB  | Combined Score | Delta [ppm] | Theo. mass             | MSMS Matched Fr |
|------|-----------|-----------------------------------------------------------------|------|----------------|-------------|------------------------|-----------------|
| 1    | 321.0958  | C <sub>16</sub> H <sub>22</sub> N <sub>2</sub> <sup>79</sup> Br | 6.50 | 97.52          | -0.82       | 321.09609 (Collection) |                 |

AB-1-180 #93 RT: 0.91 AV: 1 NL: 3.39E9  
 T: FTMS + p ESI Full ms [50.0000-750.0000]

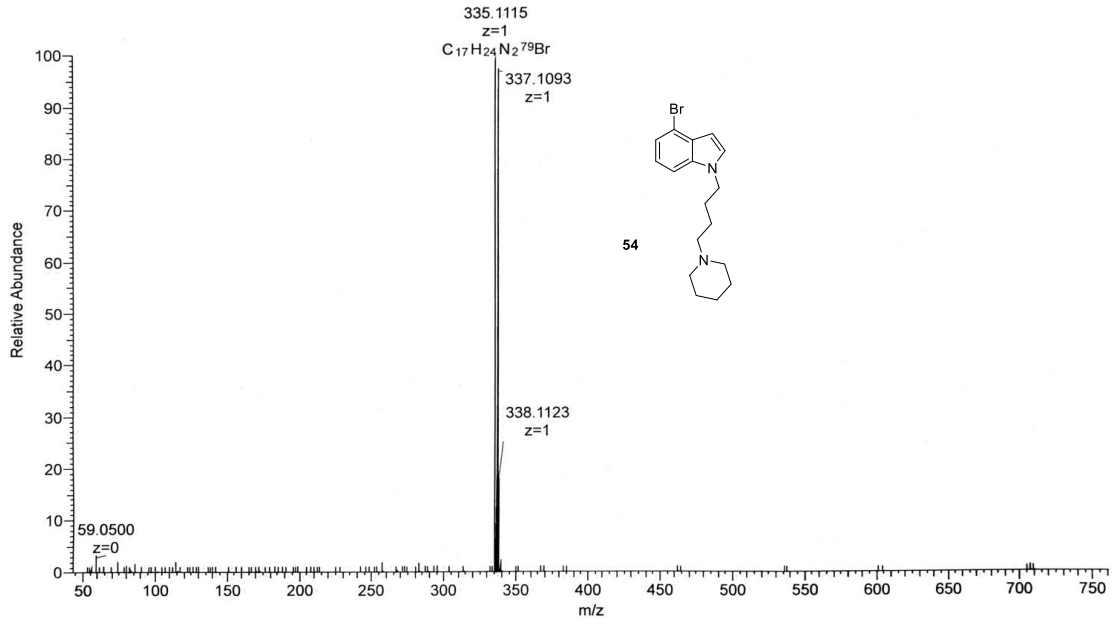

| Peak Mass | Display Formula                                                 | Delta [ppm] | Theo. mass | Combined Score | Pattern Cov. [%] | MSMS Matched Fragments |
|-----------|-----------------------------------------------------------------|-------------|------------|----------------|------------------|------------------------|
| 335.1115  | C <sub>17</sub> H <sub>24</sub> N <sub>2</sub> <sup>79</sup> Br | -0.59       | 335.11174  | 98.5           | 100              | (Collection)           |

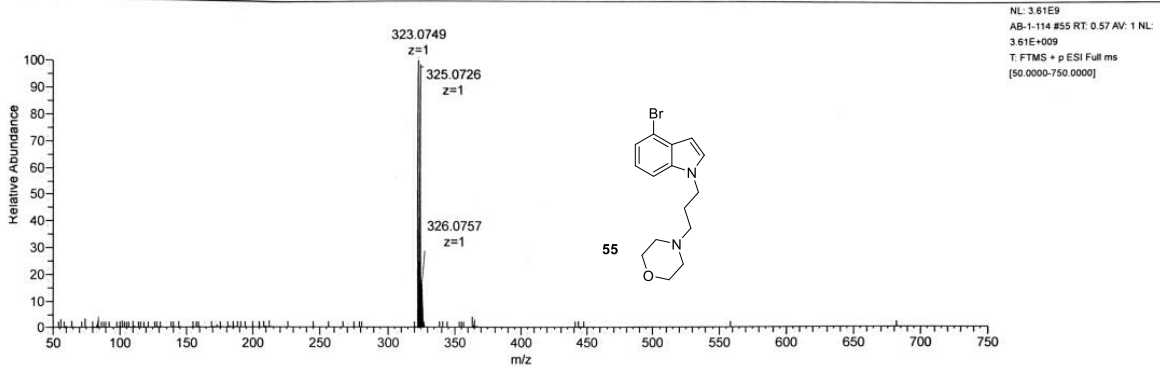

NL: 3.61E9  
 AB-1-114 #55 RT: 0.57 AV: 1 NL:  
 3.61E+009  
 T: FTMS + p ESI Full ms  
 [50.0000-750.0000]

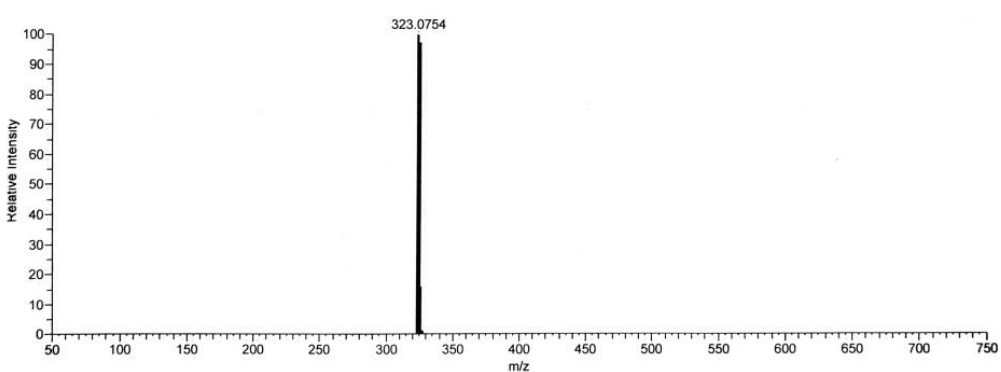

NL: 4.26E5  
 C15H20O1N2Br1 Chrg 1 R: 63606 Res.  
 Pwr. @FWHM

| ndex | m/z      | Formula                                                          | Score | RDB | Delta ppm | OriginalFormula | Theo. Mass |
|------|----------|------------------------------------------------------------------|-------|-----|-----------|-----------------|------------|
| 1    | 323.0749 | C <sub>15</sub> H <sub>20</sub> ON <sub>2</sub> <sup>79</sup> Br | 100   | 6.5 | -1.34     | C15H20ON2[79]Br | 323.07535  |

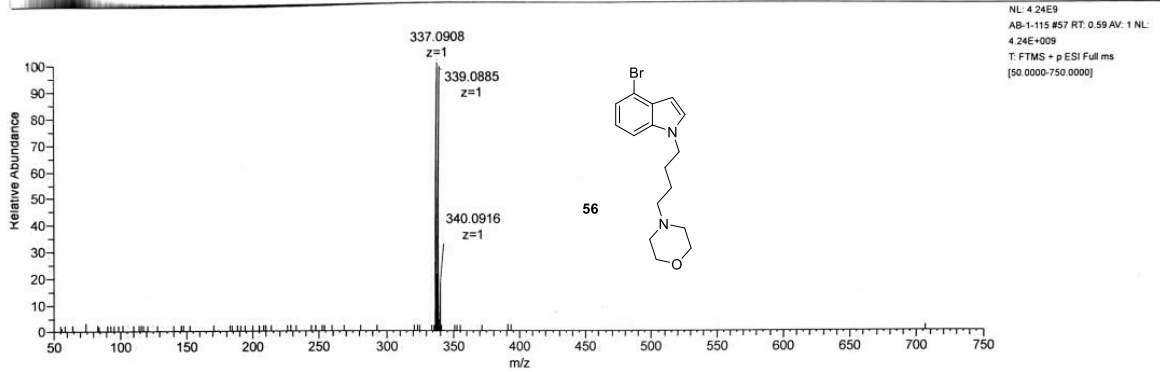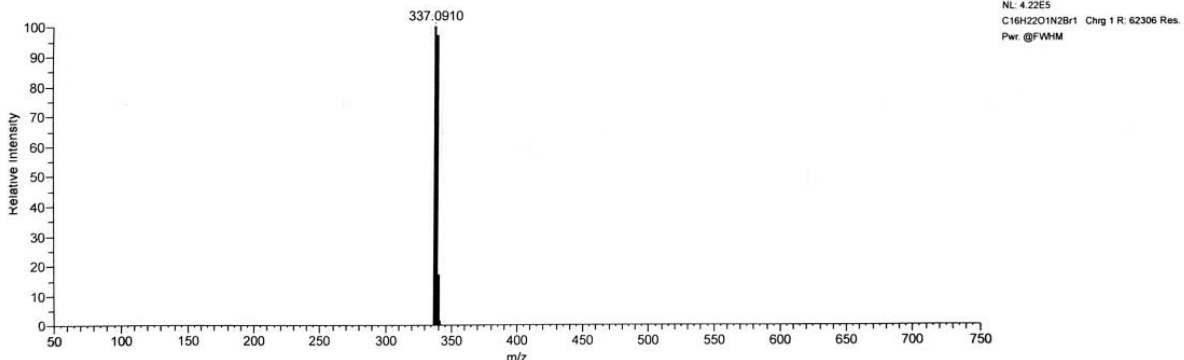

| Index | m/z      | Formula                                                          | Score | RDB | Delta ppm | OriginalFormula | Theo. Mass |
|-------|----------|------------------------------------------------------------------|-------|-----|-----------|-----------------|------------|
| 1     | 337.0908 | C <sub>16</sub> H <sub>22</sub> ON <sub>2</sub> <sup>79</sup> Br | 100   | 6.5 | -0.72     | C16H22ON2[79]Br | 337.09100  |

TF-1-163 #91 RT: 0.91 AV: 1 NL: 2.29E9  
 T: FTMS + p ESI Full ms [50.0000-750.0000]

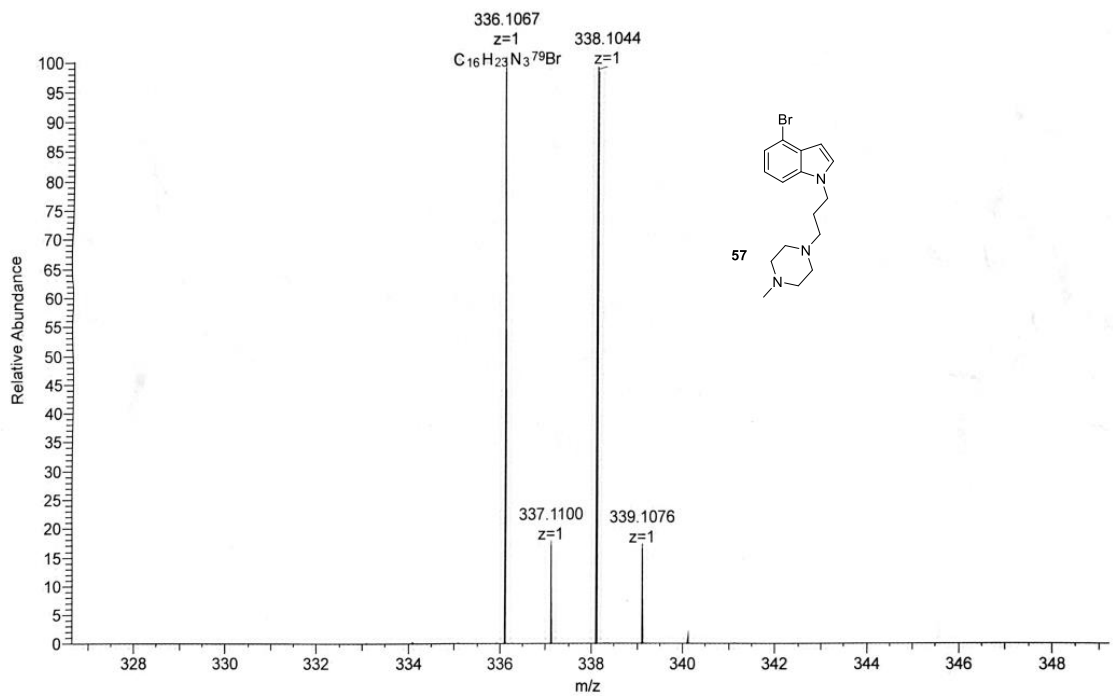

| Rank | Peak Mass | Display Formula                                                 | RDB  | Combined Score | Delta [ppm] | Theo. mass | MSMS Matched Fragm... |
|------|-----------|-----------------------------------------------------------------|------|----------------|-------------|------------|-----------------------|
| 1    | 336.1067  | C <sub>16</sub> H <sub>23</sub> N <sub>3</sub> <sup>79</sup> Br | 6.50 | 98.63          | -0.79       | 336.10699  | (Collection)          |

TF-1-181 #95 RT: 0.97 AV: 1 NL: 1.99E9  
 T: FTMS + p ESI Full ms [50.0000-750.0000]

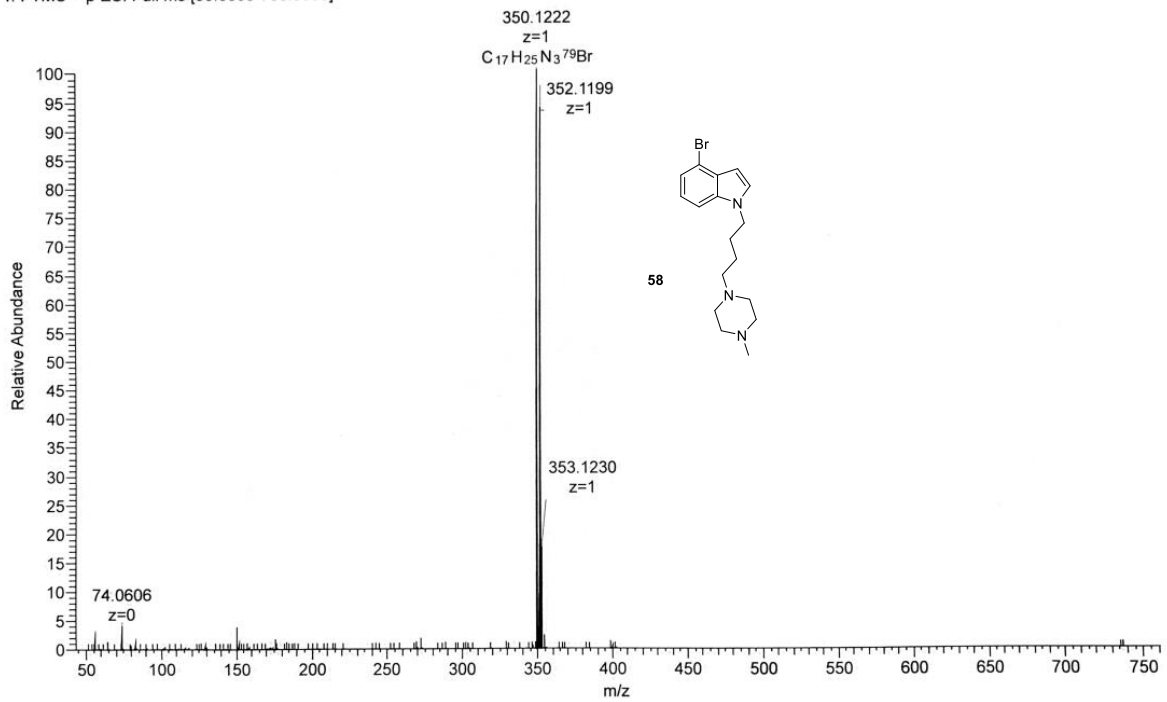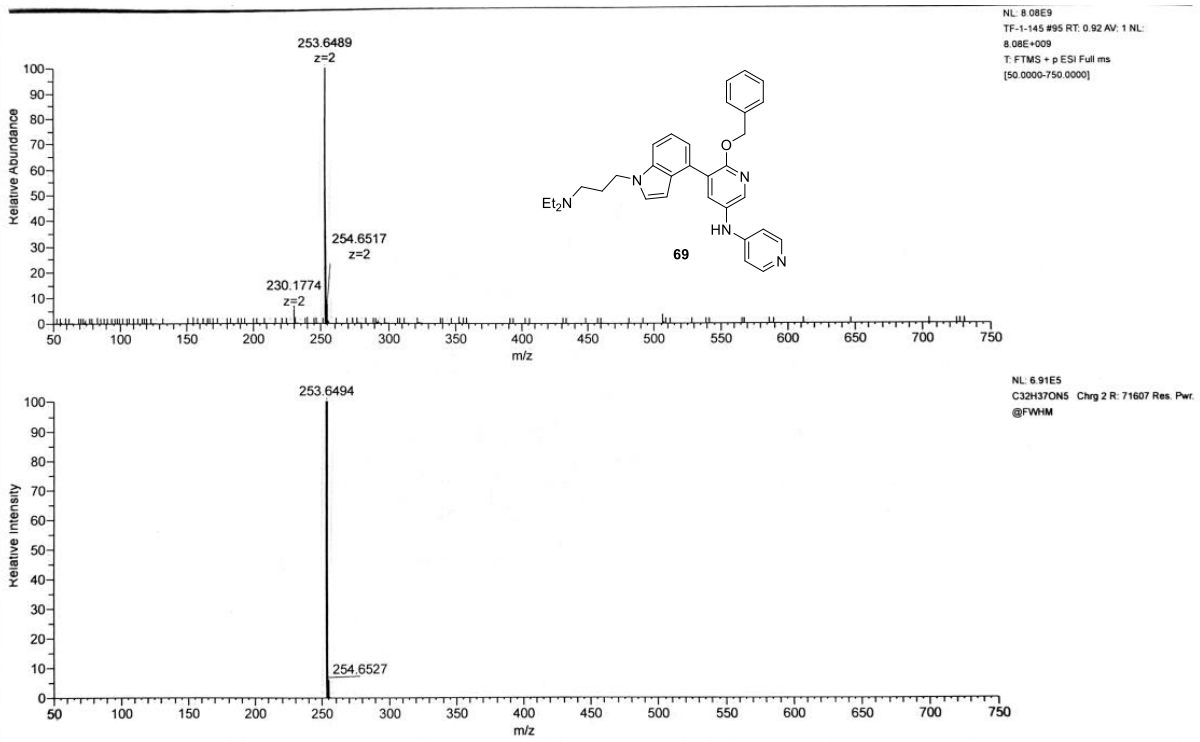

| Index | m/z      | Formula                                         | Score | RDB | Delta ppm | OriginalFormula | Theo. Mass |
|-------|----------|-------------------------------------------------|-------|-----|-----------|-----------------|------------|
| 1     | 253.6489 | C <sub>32</sub> H <sub>37</sub> ON <sub>5</sub> | 100   | 17  | -1.64     | C32H37ON5       | 253.64936  |

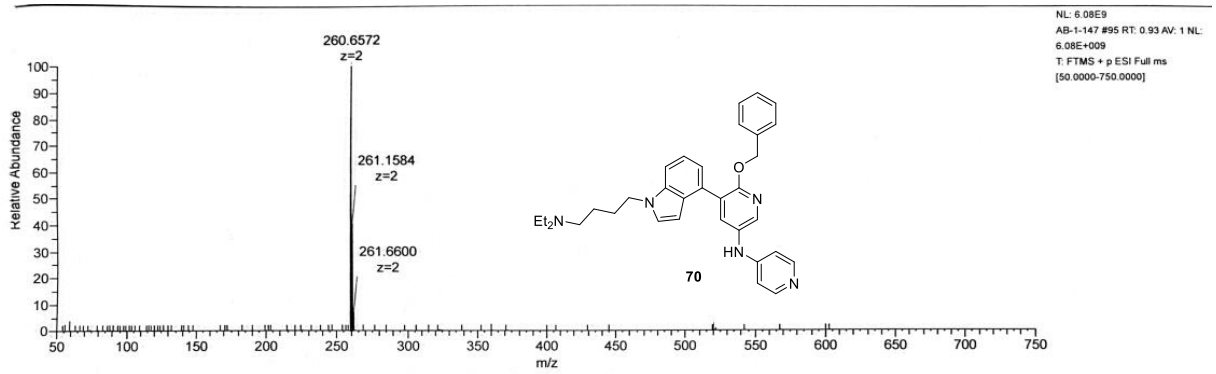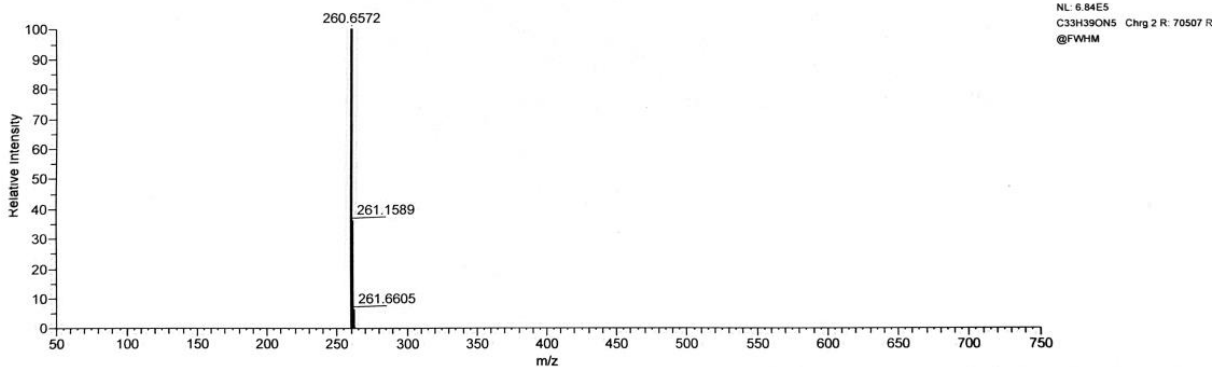

| ndex | m/z      | Formula                                         | Score | RDB | Delta ppm | OriginalFormula | Theo. Mass |
|------|----------|-------------------------------------------------|-------|-----|-----------|-----------------|------------|
| 1    | 260.6572 | C <sub>33</sub> H <sub>39</sub> ON <sub>5</sub> | 100   | 17  | -0.06     | C33H39ON5       | 260.65718  |

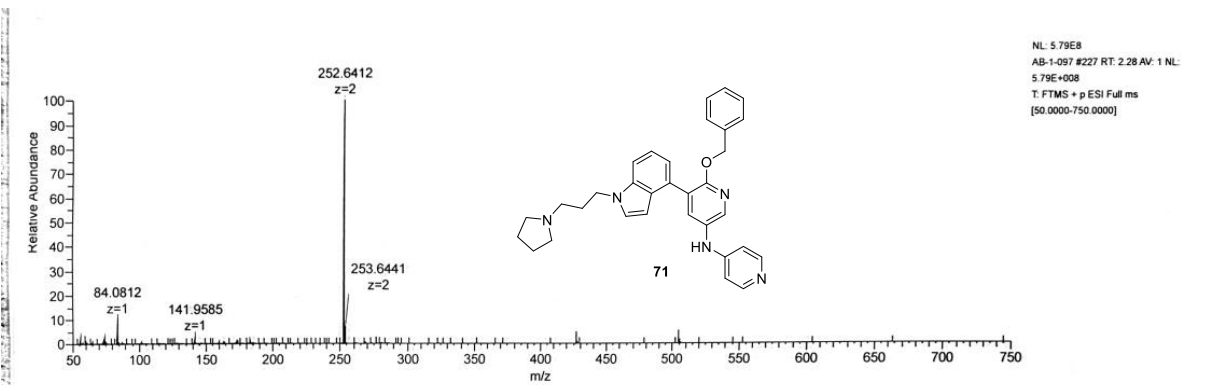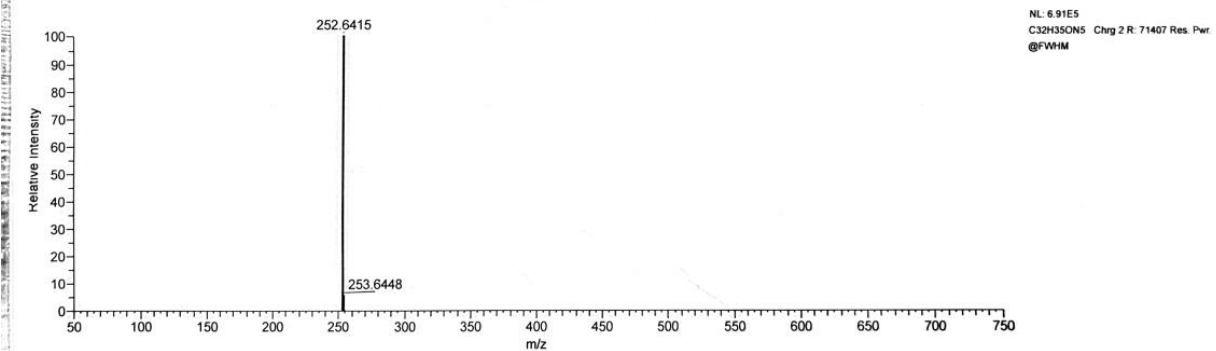

| ndex | m/z      | Formula                                         | Score | RDB | Delta ppm | OriginalFormula | Theo. Mass |
|------|----------|-------------------------------------------------|-------|-----|-----------|-----------------|------------|
| 1    | 252.6412 | C <sub>32</sub> H <sub>35</sub> ON <sub>5</sub> | 100   | 18  | -1.42     | C32H35ON5       | 252.64153  |

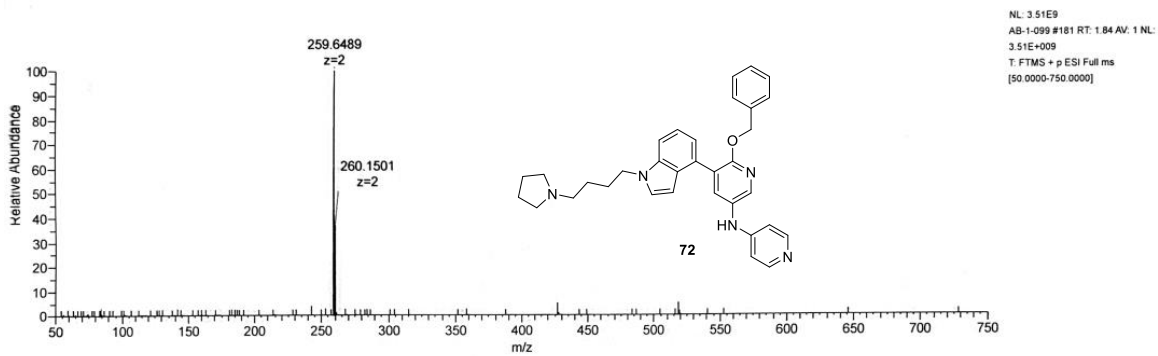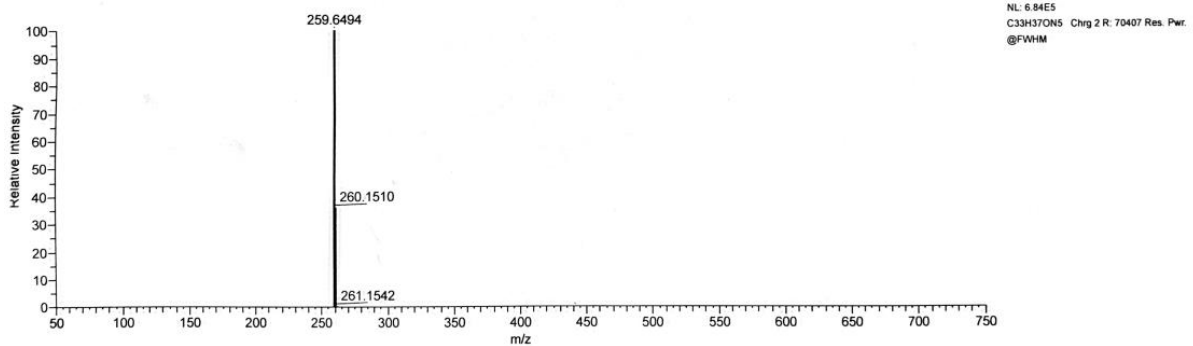

| Index | m/z      | Formula                                         | Score | RDB | Delta ppm | OriginalFormula | Theo. Mass |
|-------|----------|-------------------------------------------------|-------|-----|-----------|-----------------|------------|
| 1     | 259.6489 | C <sub>33</sub> H <sub>37</sub> ON <sub>5</sub> | 100   | 18  | -1.9      | C33H37ON5       | 259.64936  |

TF-1-173 #93 RT: 0.90 AV: 1 NL: 7.71E9  
 T: FTMS + p ESI Full ms [50.0000-750.0000]

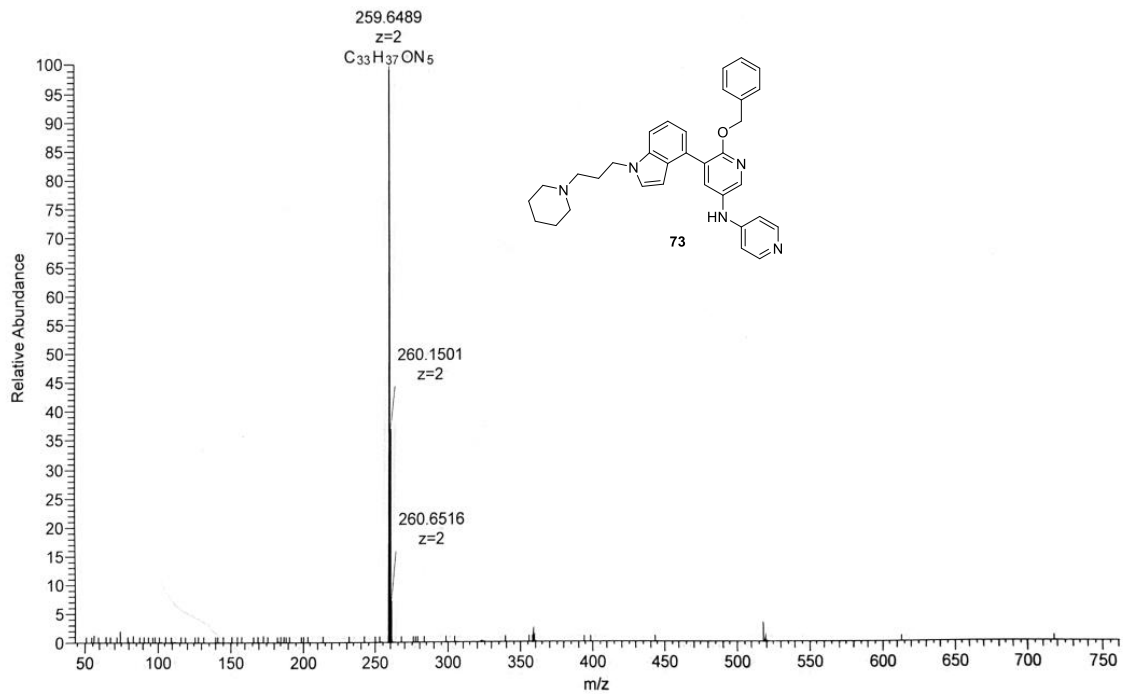

| Rank | Peak Mass | Display Formula                                 | RDB   | Combined Score | Delta [ppm] | Theo. mass | MSMS Matched Fragm... |
|------|-----------|-------------------------------------------------|-------|----------------|-------------|------------|-----------------------|
| 1    | 259.6489  | C <sub>33</sub> H <sub>37</sub> ON <sub>5</sub> | 18.00 | 97.19          | -1.90       | 259.64936  | (Collection)          |

NC-006 #99 RT: 0.99 AV: 1 NL: 8.63E9  
 T: FTMS + p ESI Full ms [50.0000-750.0000]

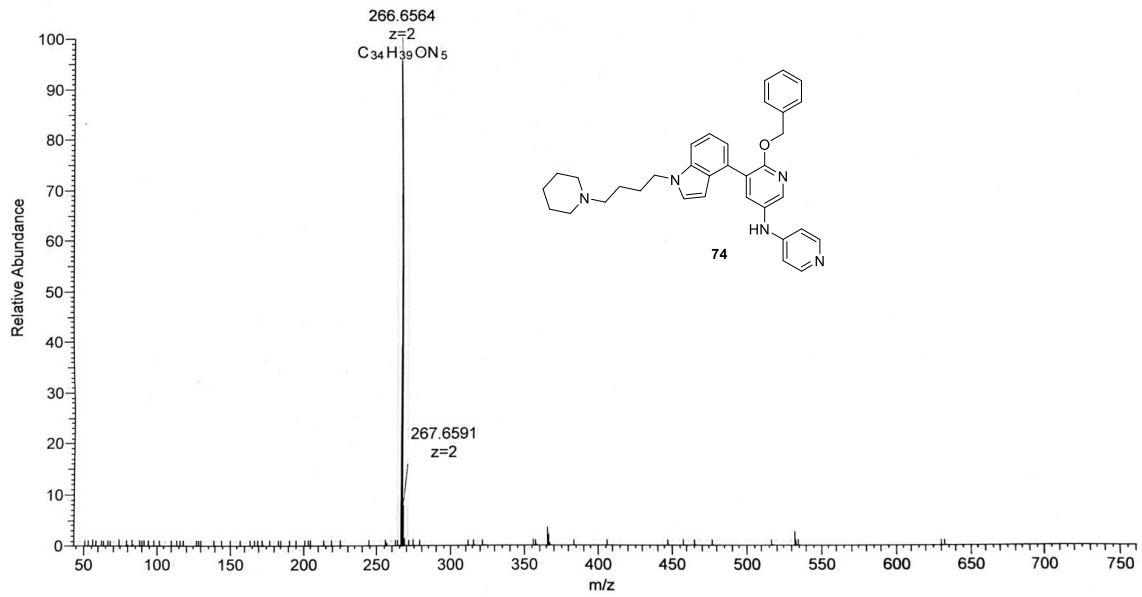

| Peak Mass | Display Formula                                 | Delta [ppm] | Theo. mass | Combined Score | Pattern Cov. [%] | MSMS Matched Fragments (Collection) |
|-----------|-------------------------------------------------|-------------|------------|----------------|------------------|-------------------------------------|
| 266.6564  | C <sub>34</sub> H <sub>39</sub> ON <sub>5</sub> | -2.81       | 266.65718  | 91.66          | 95.22            |                                     |

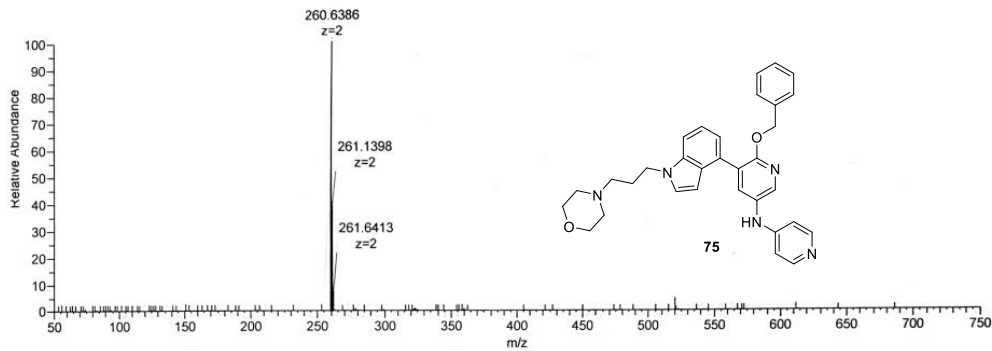

NL: 6.90E5  
 TF-1-149 #95 RT: 0.92 AV: 1 NL:  
 8.55E+009  
 T: FTMS + p ESI Full ms  
 [50.0000-750.0000]

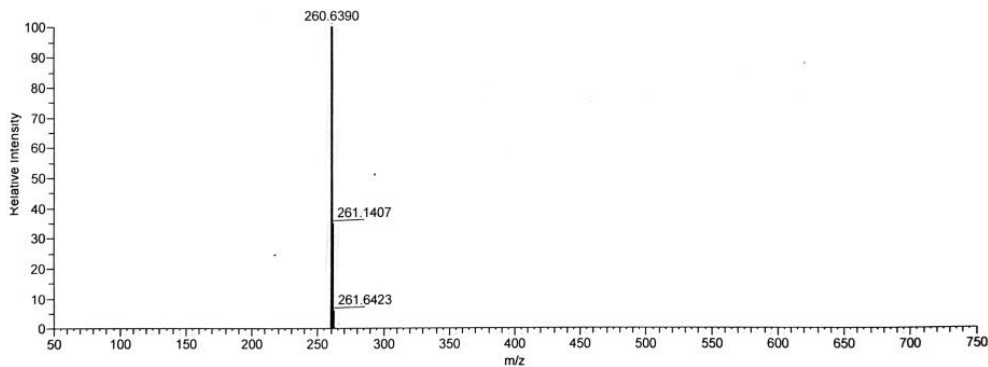

NL: 6.90E5  
 C32H35O2N5 Chrg 2 R: 70707 Res. Pwr:  
 @FWHM

| Index | m/z      | Formula                                                       | Score | RDB | Delta ppm | Original Formula | Theo. Mass |
|-------|----------|---------------------------------------------------------------|-------|-----|-----------|------------------|------------|
| 1     | 260.6386 | C <sub>32</sub> H <sub>35</sub> O <sub>2</sub> N <sub>5</sub> | 100   | 18  | -1.57     | C32H35O2N5       | 260.63899  |

S-1-169 #93 RT: 0.92 AV: 1 NL: 7.56E9  
T: FTMS + p ESI Full ms [50.0000-750.0000]

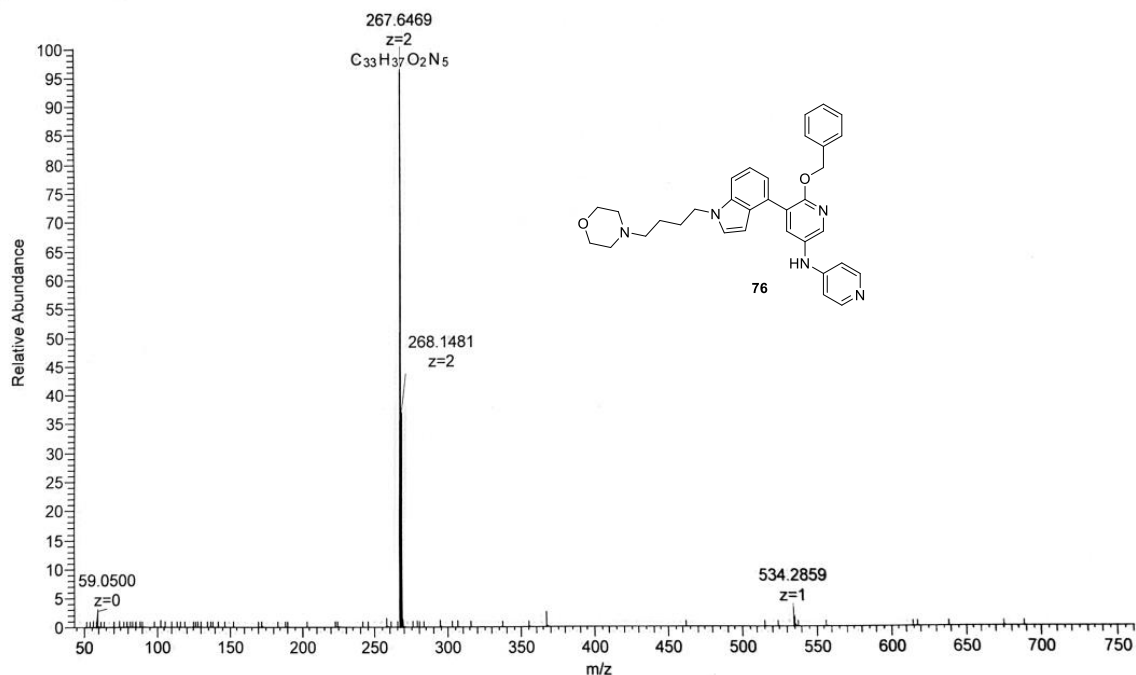

| Peak Mass | Display Formula                                               | Delta [ppm] | Theo. mass | Combined Score | Pattern Cov. [%] | MSMS Matched Fragments (Collection) |
|-----------|---------------------------------------------------------------|-------------|------------|----------------|------------------|-------------------------------------|
| 267.6469  | C <sub>33</sub> H <sub>37</sub> O <sub>2</sub> N <sub>5</sub> | 0.25        | 267.64681  | 98.81          | 100              |                                     |

TF-1-174 #89 RT: 0.90 AV: 1 NL: 7.37E9  
T: FTMS + p ESI Full ms [50.0000-750.0000]

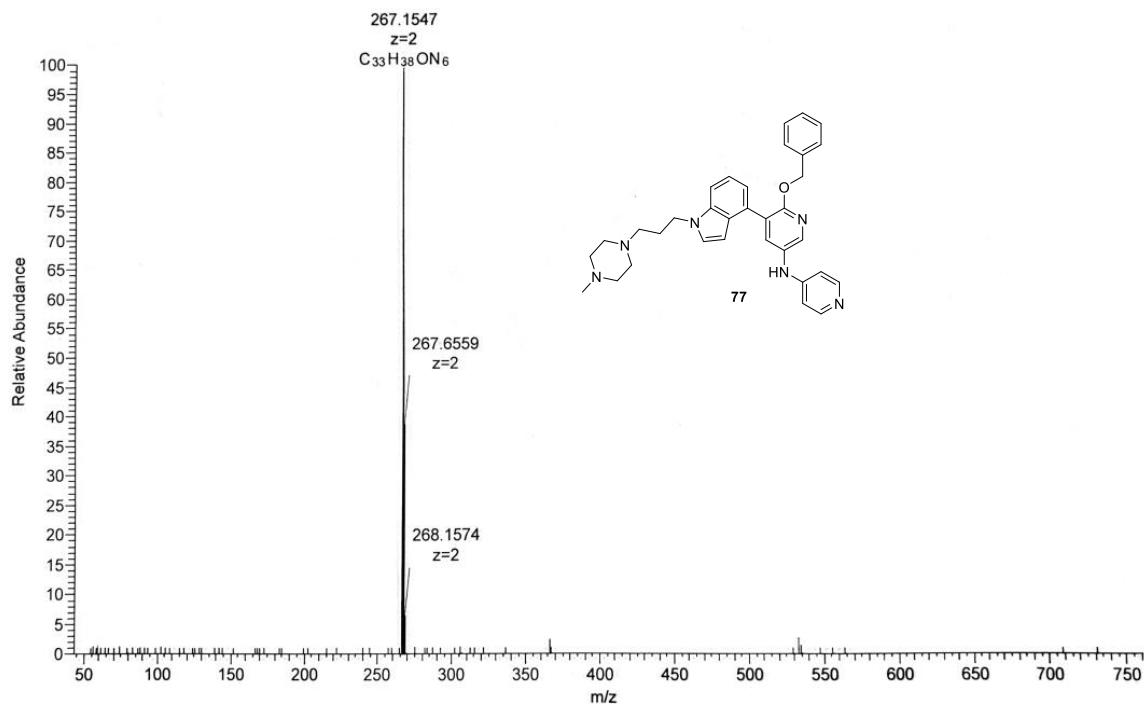

| Peak Mass | Display Formula                                 | Delta [ppm] | Theo. mass | Combined Score | Pattern Cov. [%] | MSMS Matched Fragment (Collection) |
|-----------|-------------------------------------------------|-------------|------------|----------------|------------------|------------------------------------|
| 267.1547  | C <sub>33</sub> H <sub>38</sub> ON <sub>6</sub> | -0.54       | 267.15481  | 98.49          | 100              |                                    |



TF-1-192 #95 RT: 0.93 AV: 1 NL: 6.58E9  
 T: FTMS + p ESI Full ms [50.0000-750.0000]

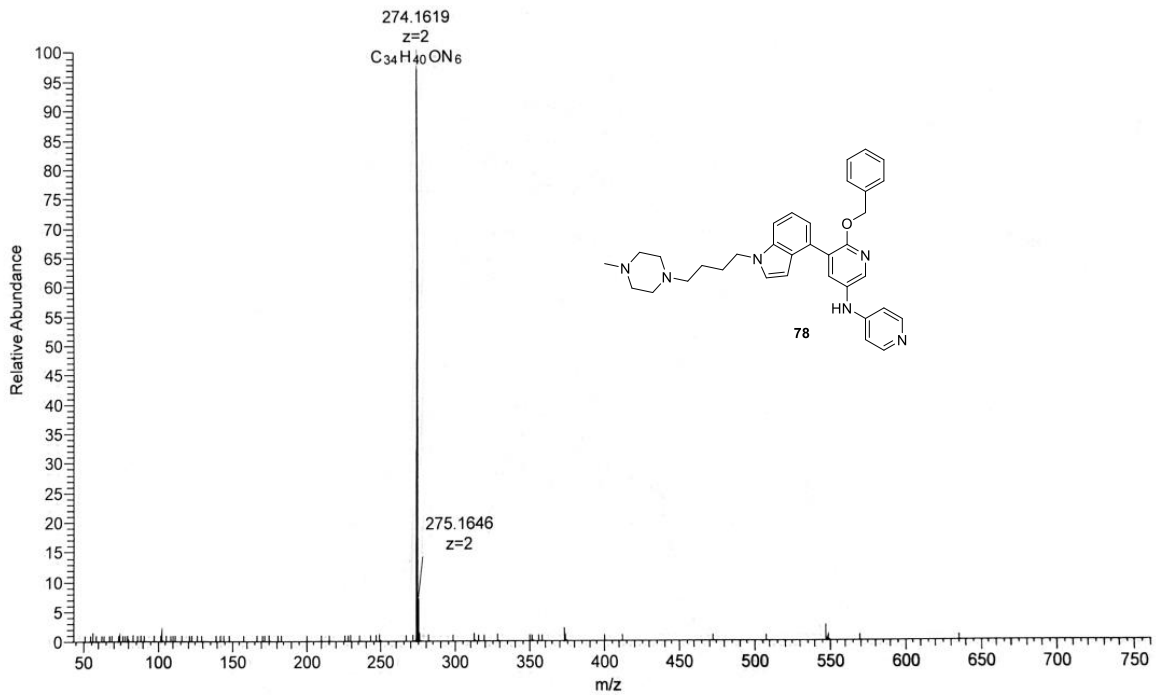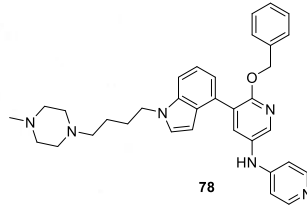

| Peak Mass | Display Formula                                 | Delta [ppm] | Theo. mass | Combined Score | Pattern Cov. [%] | MSMS Matched Fragme |
|-----------|-------------------------------------------------|-------------|------------|----------------|------------------|---------------------|
| 274.1619  | C <sub>34</sub> H <sub>40</sub> ON <sub>6</sub> | -2.79       | 274.16263  | 96.92          | 100              | (Collection)        |

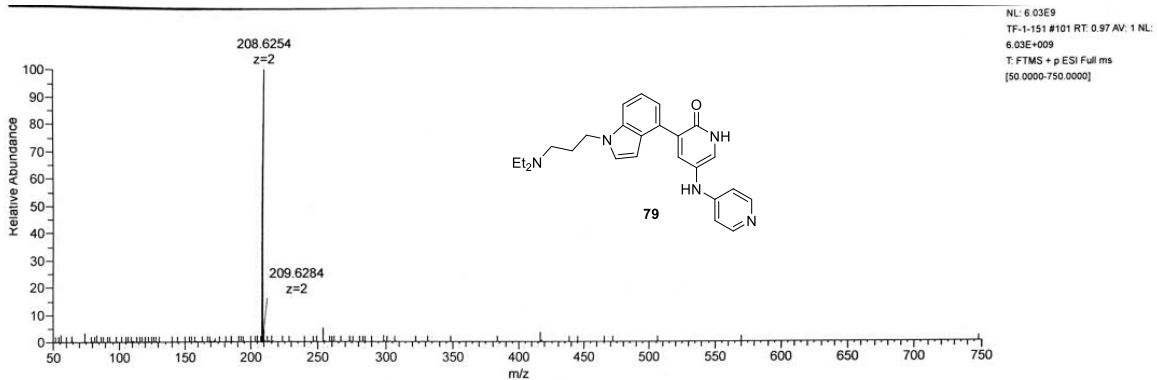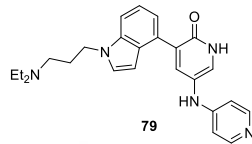

NL: 6.03E9  
 TF-1-151 #101 RT: 0.97 AV: 1 NL:  
 6.03E+009  
 T: FTMS + p ESI Full ms  
 [50.0000-750.0000]

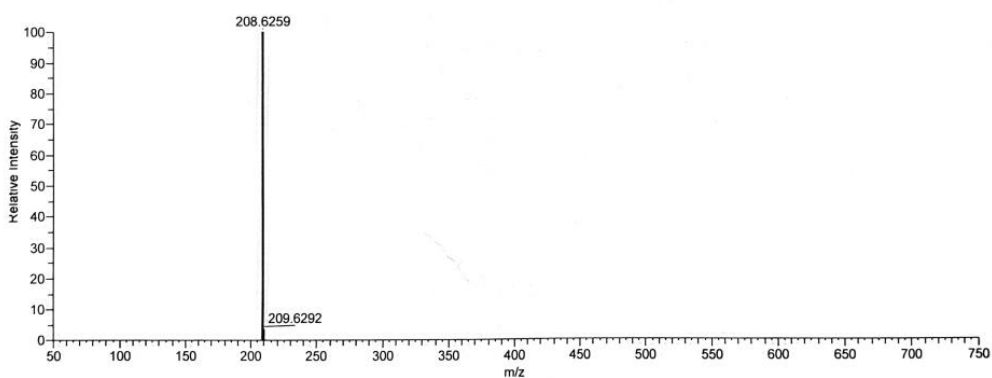

NL: 7.46E5  
 C25H31ON5 Chrg 2 R: 79407 Res. Pwr.  
 @FWHM

| index | m/z      | Formula                                         | Score            | RDB | Delta ppm | OriginalFormula | Theo. Mass |
|-------|----------|-------------------------------------------------|------------------|-----|-----------|-----------------|------------|
| 1     | 208.6254 | C <sub>25</sub> H <sub>31</sub> ON <sub>5</sub> | 93.9020117547757 | 13  | -2.33     | C25H31ON5       | 208.62588  |

TF-1-198 #95 RT: 0.92 AV: 1 NL: 7.58E9  
T: FTMS + p ESI Full ms [50.0000-750.0000]

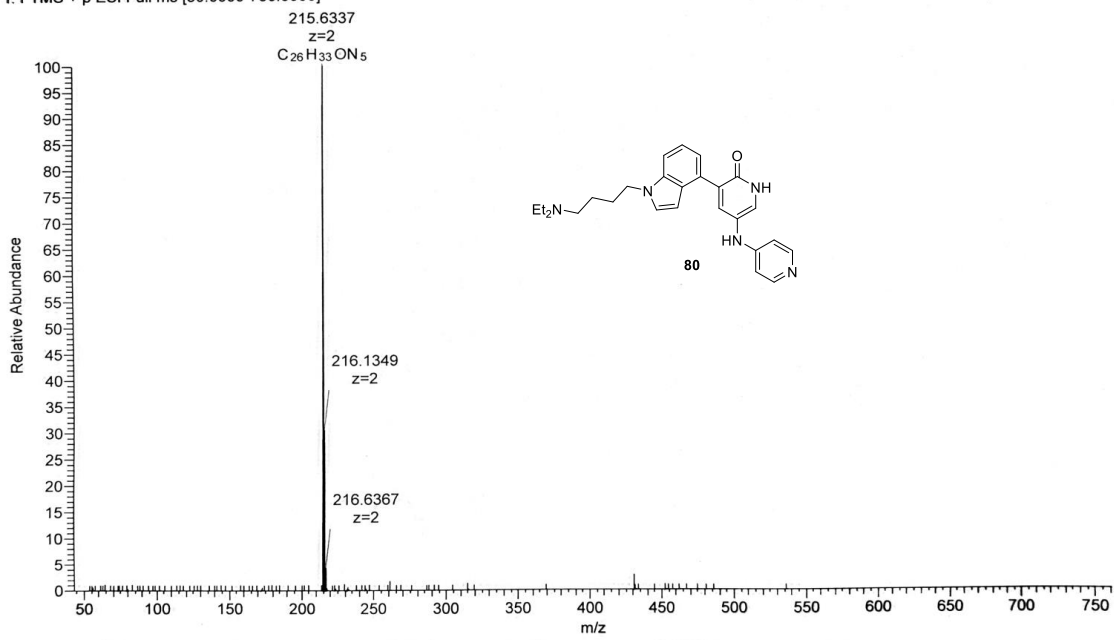

| Peak Mass | Display Formula                                 | Delta [ppm] | Theo. mass | Combined Score | Pattern Cov. [%] | MSMS Matched Fragments (Collection) |
|-----------|-------------------------------------------------|-------------|------------|----------------|------------------|-------------------------------------|
| 215.6337  | C <sub>26</sub> H <sub>33</sub> ON <sub>5</sub> | -0.04       | 215.63371  | 96.88          | 99.72            |                                     |

U:\ddid\ZZZZ\MMIDREURS DE KINASES\AB-1-U90.fidw

AB-1-098 #93 RT: 0.90 AV: 1 NL: 4.01E9  
T: FTMS + p ESI Full ms [50.0000-750.0000]

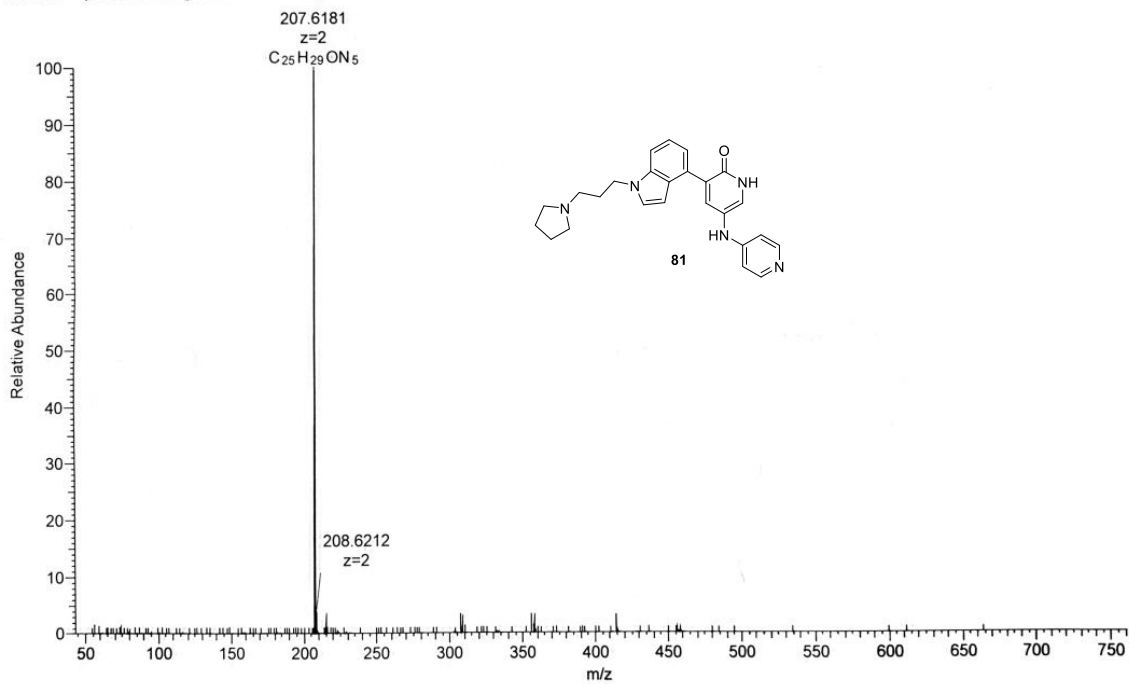

| Peak Mass | Display Formula                                 | Delta [ppm] | Theo. mass | Combined Score | Pattern Cov. [%] | MSMS Matched Fragments (Collection) |
|-----------|-------------------------------------------------|-------------|------------|----------------|------------------|-------------------------------------|
| 207.6181  | C <sub>25</sub> H <sub>29</sub> ON <sub>5</sub> | 0.22        | 207.61806  | 98.04          | 100              |                                     |

TF-1-200 #95 RT: 0.93 AV: 1 NL: 8.02E9  
T: FTMS + p ESI Full ms [50.0000-750.0000]

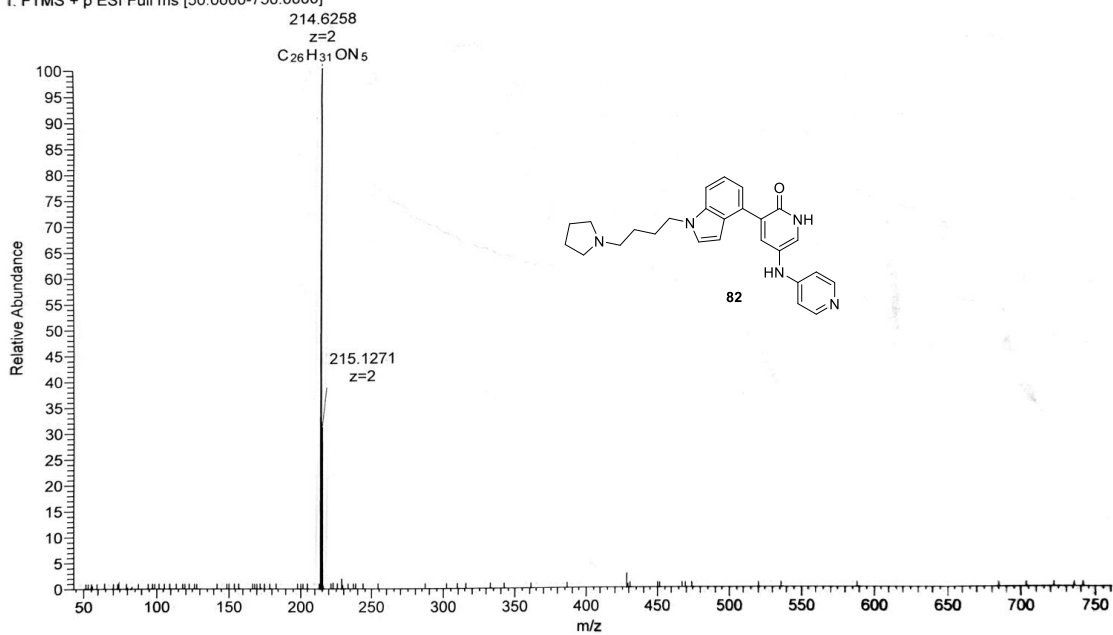

| Peak Mass | Display Formula                                 | Delta [ppm] | Theo. mass | Combined Score | Pattern Cov. [%] | MSMS Matched Fragments |
|-----------|-------------------------------------------------|-------------|------------|----------------|------------------|------------------------|
| 214.6258  | C <sub>26</sub> H <sub>31</sub> ON <sub>5</sub> | -0.27       | 214.62588  | 98.54          | 100              | (Collection)           |

TF-1-177 #91 RT: 0.92 AV: 1 NL: 6.68E9  
T: FTMS + p ESI Full ms [50.0000-750.0000]

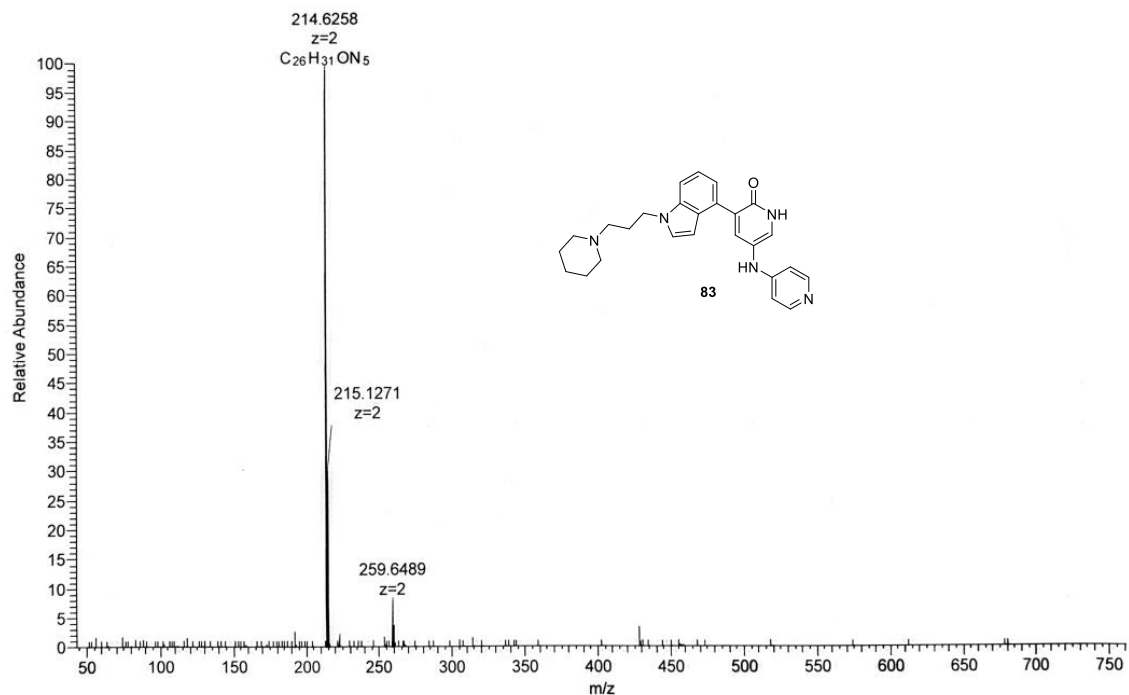

| Peak Mass | Display Formula                                 | Delta [ppm] | Theo. mass | Combined Score | Pattern Cov. [%] | MSMS Matched Fragments |
|-----------|-------------------------------------------------|-------------|------------|----------------|------------------|------------------------|
| 214.6258  | C <sub>26</sub> H <sub>31</sub> ON <sub>5</sub> | -0.27       | 214.62588  | 98.63          | 100              | (Collection)           |

TF-1-193 #101 RT: 1.00 AV: 1 NL: 4.31E9  
 T: FTMS + p ESI Full ms [50.0000-750.0000]

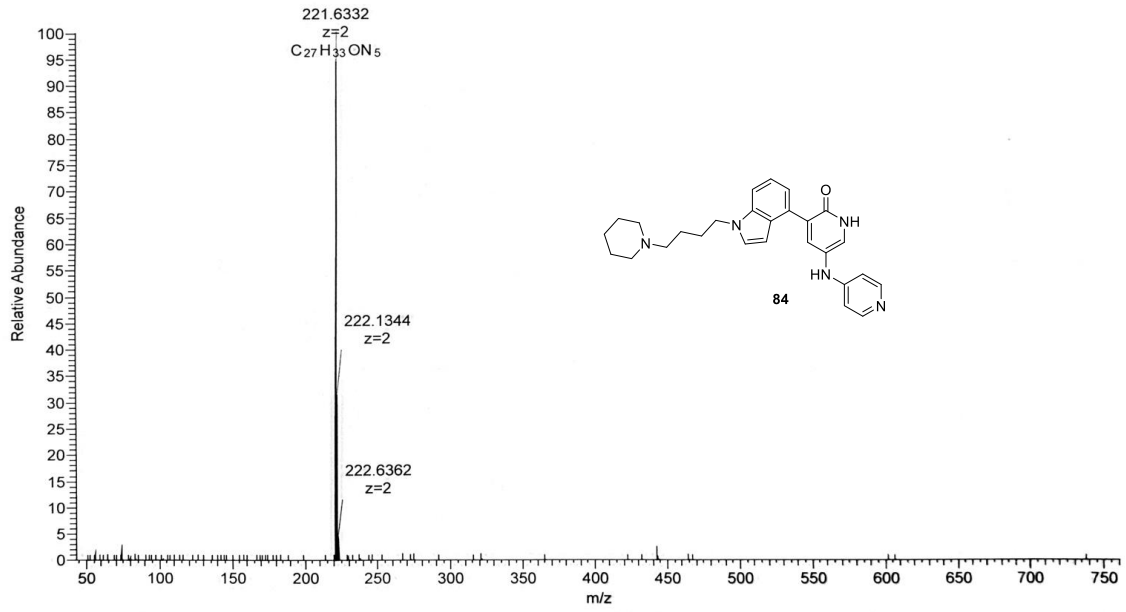

| Peak Mass | Display Formula                                 | Delta [ppm] | Theo. mass | Combined Score | Pattern Cov. [%] | MSMS Matched Fragments |
|-----------|-------------------------------------------------|-------------|------------|----------------|------------------|------------------------|
| 221.6332  | C <sub>27</sub> H <sub>33</sub> ON <sub>5</sub> | -2.25       | 221.63371  | 97.16          | 100              | (Collection)           |

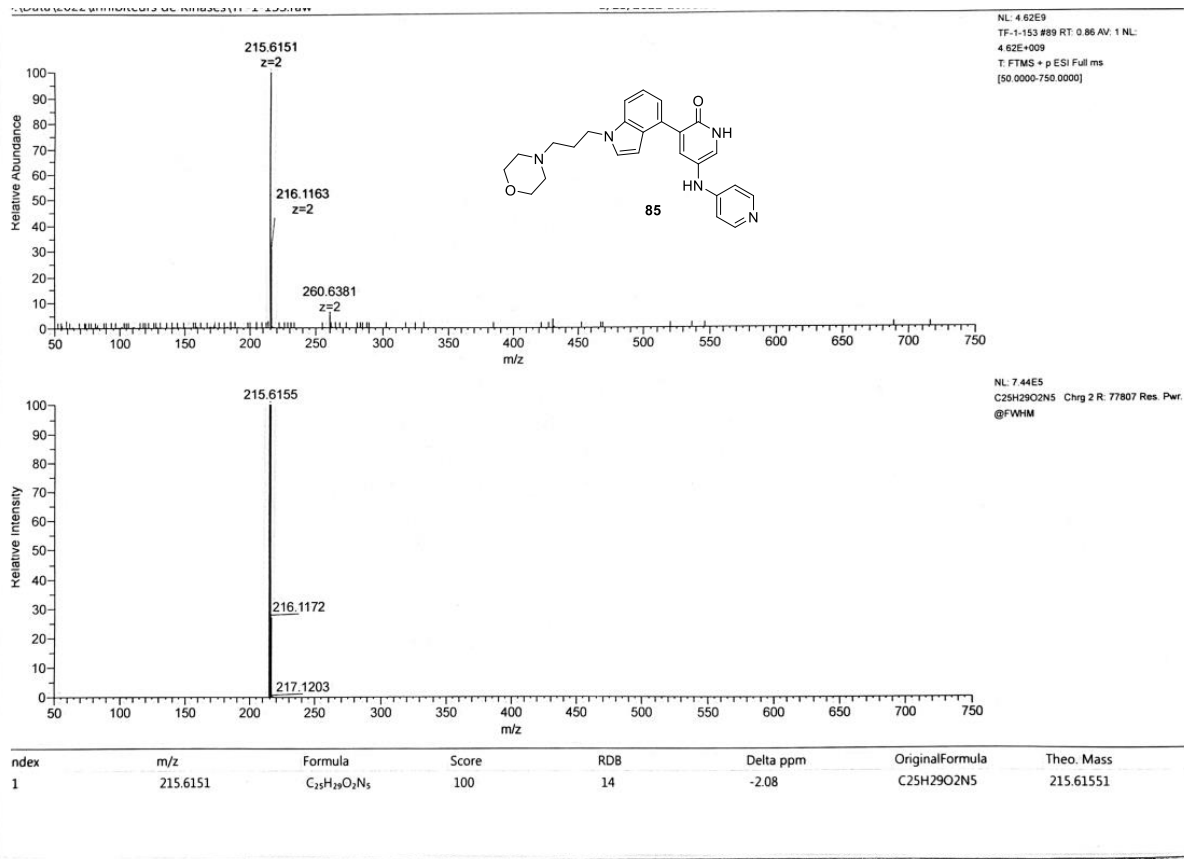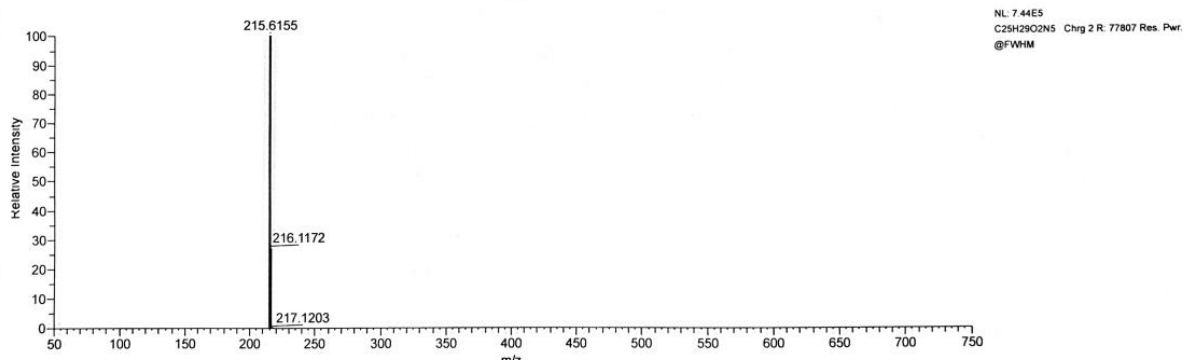

| Index | m/z      | Formula                                                       | Score | RDB | Delta ppm | Original Formula                                              | Theo. Mass |
|-------|----------|---------------------------------------------------------------|-------|-----|-----------|---------------------------------------------------------------|------------|
| 1     | 215.6151 | C <sub>25</sub> H <sub>29</sub> O <sub>2</sub> N <sub>5</sub> | 100   | 14  | -2.08     | C <sub>25</sub> H <sub>29</sub> O <sub>2</sub> N <sub>5</sub> | 215.61551  |

TF-1-187 #89 RT: 0.91 AV: 1 NL: 5.69E9  
T: FTMS + p ESI Full ms [50.0000-750.0000]

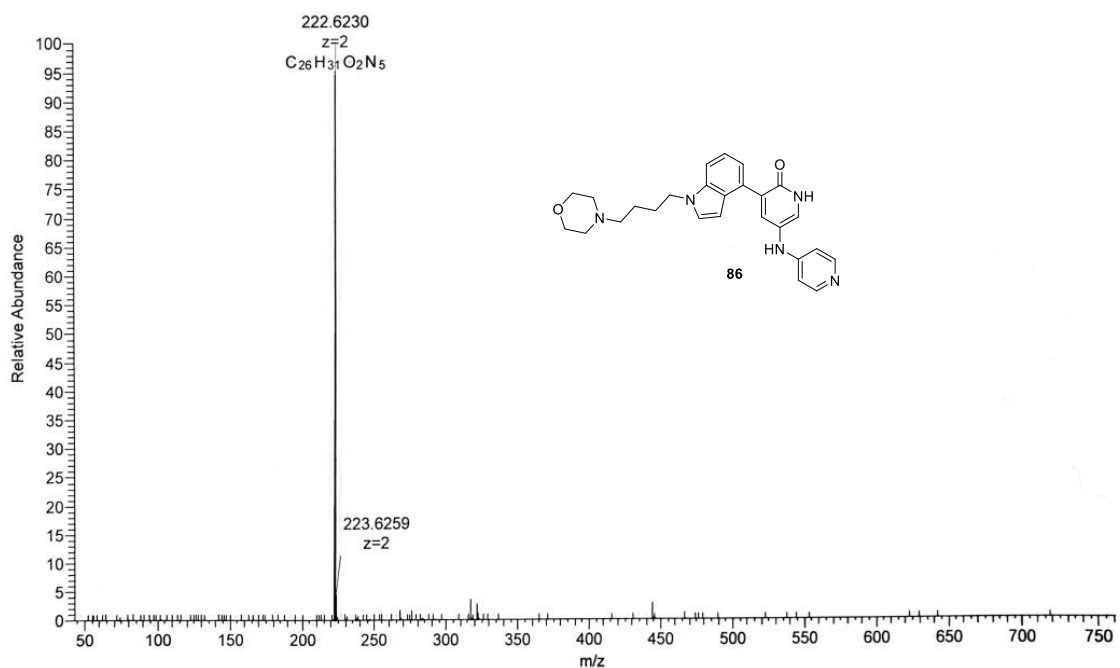

| Peak Mass | Display Formula                                               | Delta [ppm] | Theo. mass | Combined Score | Pattern Cov. [%] | MSMS Matched Fragments (Collection) |
|-----------|---------------------------------------------------------------|-------------|------------|----------------|------------------|-------------------------------------|
| 222.6230  | C <sub>26</sub> H <sub>31</sub> O <sub>2</sub> N <sub>5</sub> | -1.52       | 222.62334  | 97.64          | 100              |                                     |

TF-1-188 #91 RT: 0.89 AV: 1 NL: 4.84E9  
T: FTMS + p ESI Full ms [50.0000-750.0000]

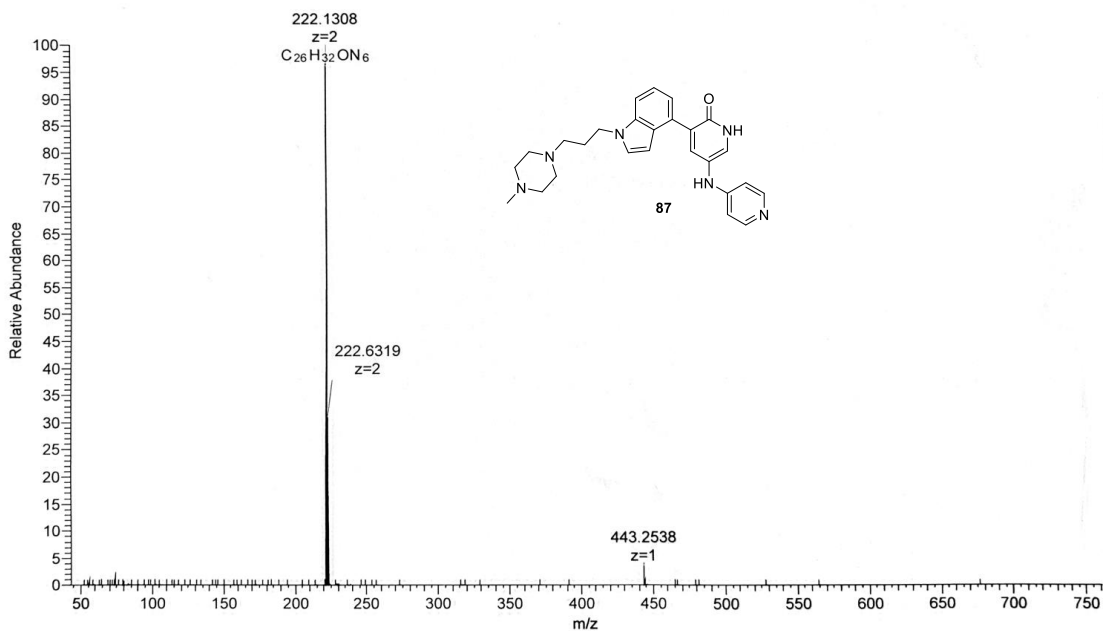

| Peak Mass | Display Formula                                 | Delta [ppm] | Theo. mass | Combined Score | Pattern Cov. [%] | MSMS Matched Fragments (Collection) |
|-----------|-------------------------------------------------|-------------|------------|----------------|------------------|-------------------------------------|
| 222.1308  | C <sub>26</sub> H <sub>32</sub> ON <sub>6</sub> | -2.47       | 222.13133  | 73.74          | 78.32            |                                     |

TF-1-194 #95 RT: 0.92 AV: 1 NL: 6.53E9  
T: FTMS + p ESI Full ms [50.0000-750.0000]

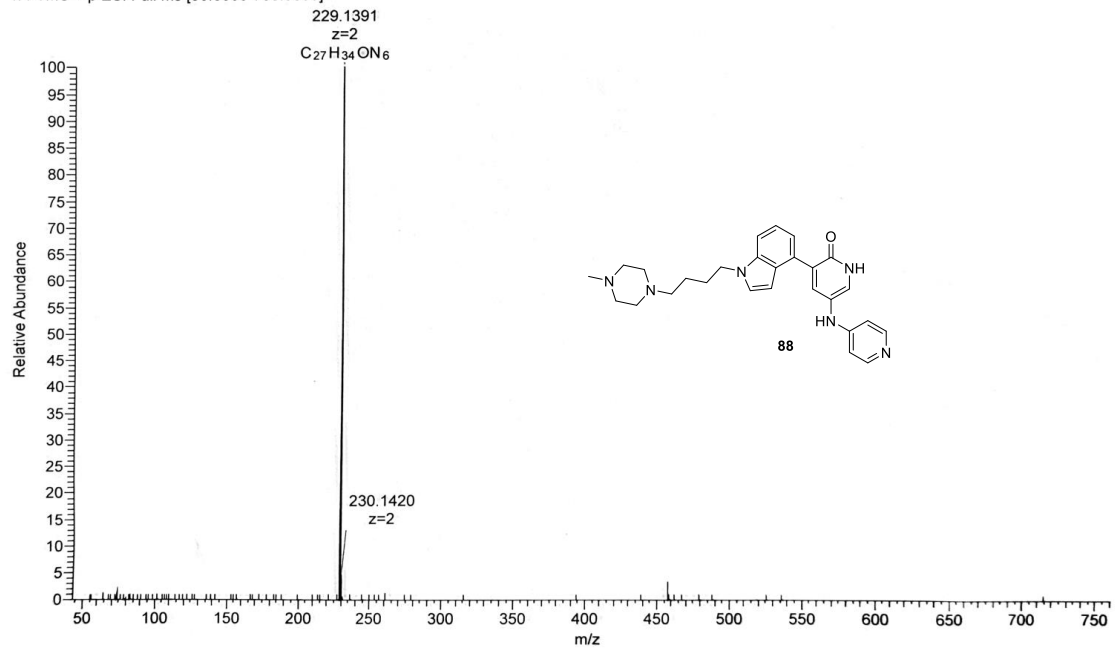

| Peak Mass | Display Formula                                 | Delta (ppm) | Theo. mass | Combined Score | Pattern Cov. (%) | MSMS Matched Fragments (Collection) |
|-----------|-------------------------------------------------|-------------|------------|----------------|------------------|-------------------------------------|
| 229.1391  | C <sub>27</sub> H <sub>34</sub> ON <sub>6</sub> | -0.45       | 229.13916  | 98.63          | 100              |                                     |
